# Supplementary material for: Genome-Wide Approach to Identify Quantitative Trait Loci for Drought Tolerance in Tetraploid Potato (Solanum tuberosum L.)
Source: MDPI journal article supplement (doi:10.3390/ijms22116123), 2021-06-07
Supplement: s1 [file s1]

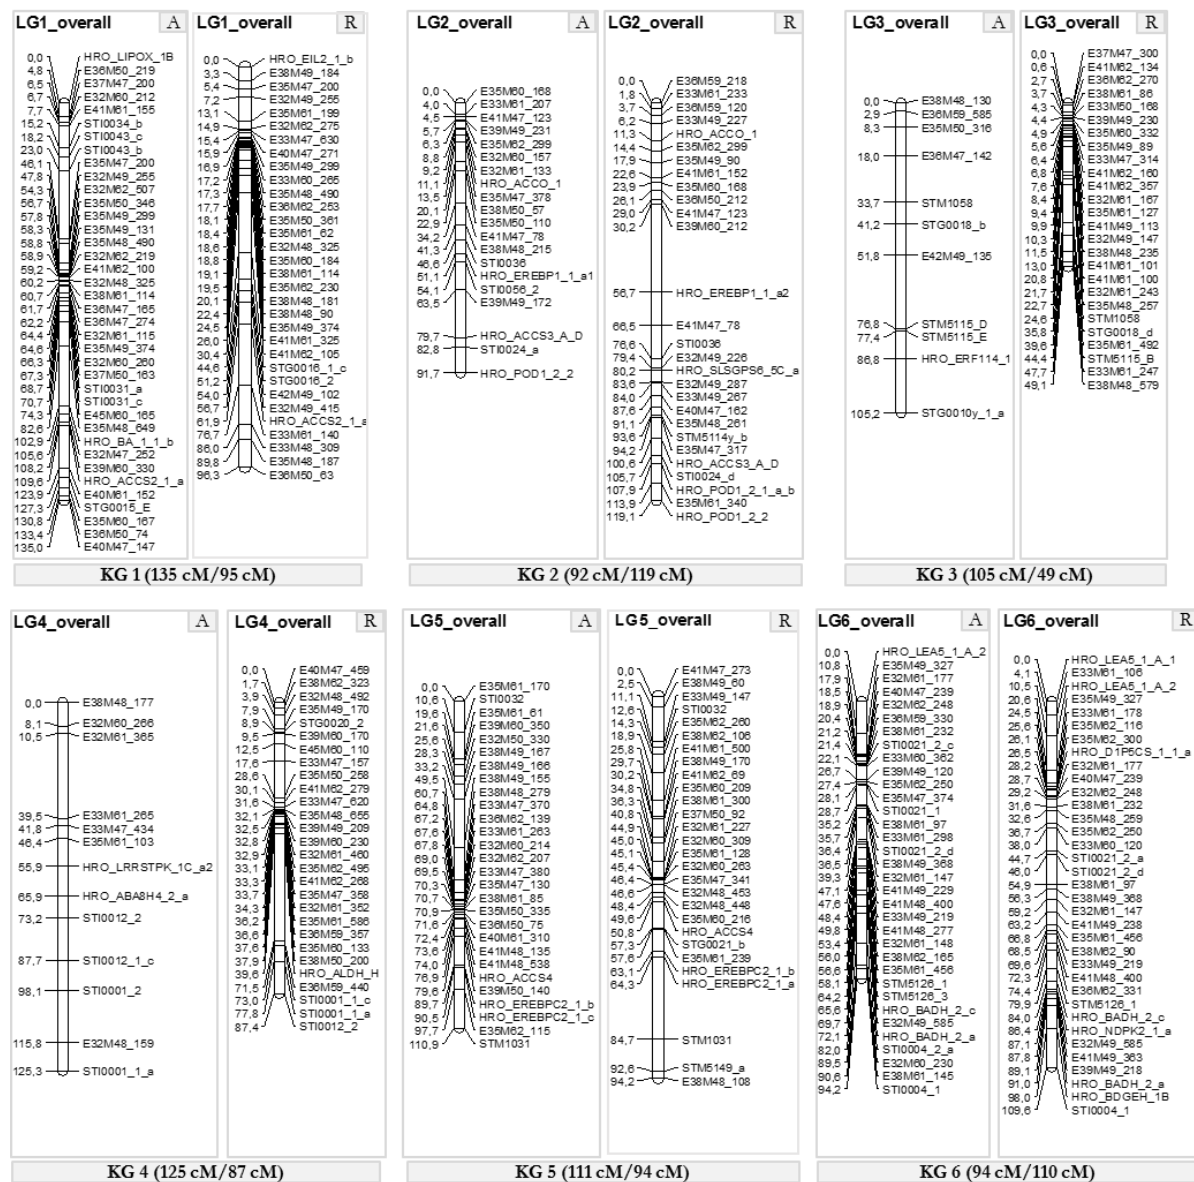

Figure S1: Overall genetic maps for Albatros (A drought tolerant) and Ramses (R drought sensitive). Informative linkage group specific SSR-markers (STM, STI, STG, reviewed in Ghislain *et al.* [33]). Drought tolerance candidate gene specific SSR-markers (HRO\_ [34] and AFLP-markers (E) were mapped in the  $F_1$  A×R. Parent Albatros (A) left, parent Ramses (R) right for all linkage groups LG1-12.

Figure S1 continued

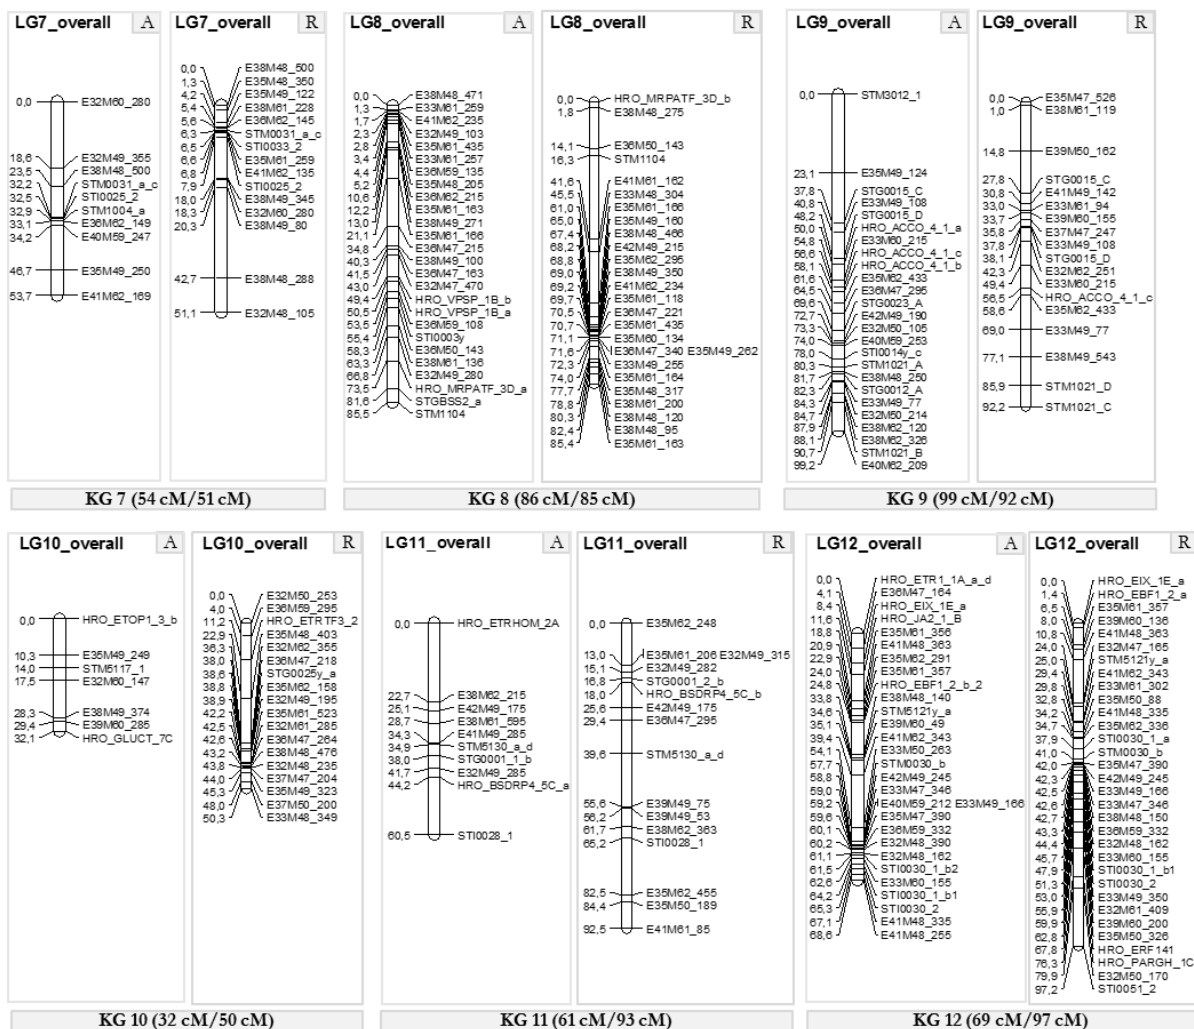

# Distribution of SSR and AFLP markers on the homoeologous chromosomes in the F1-population A×R

A×R – Albatros:

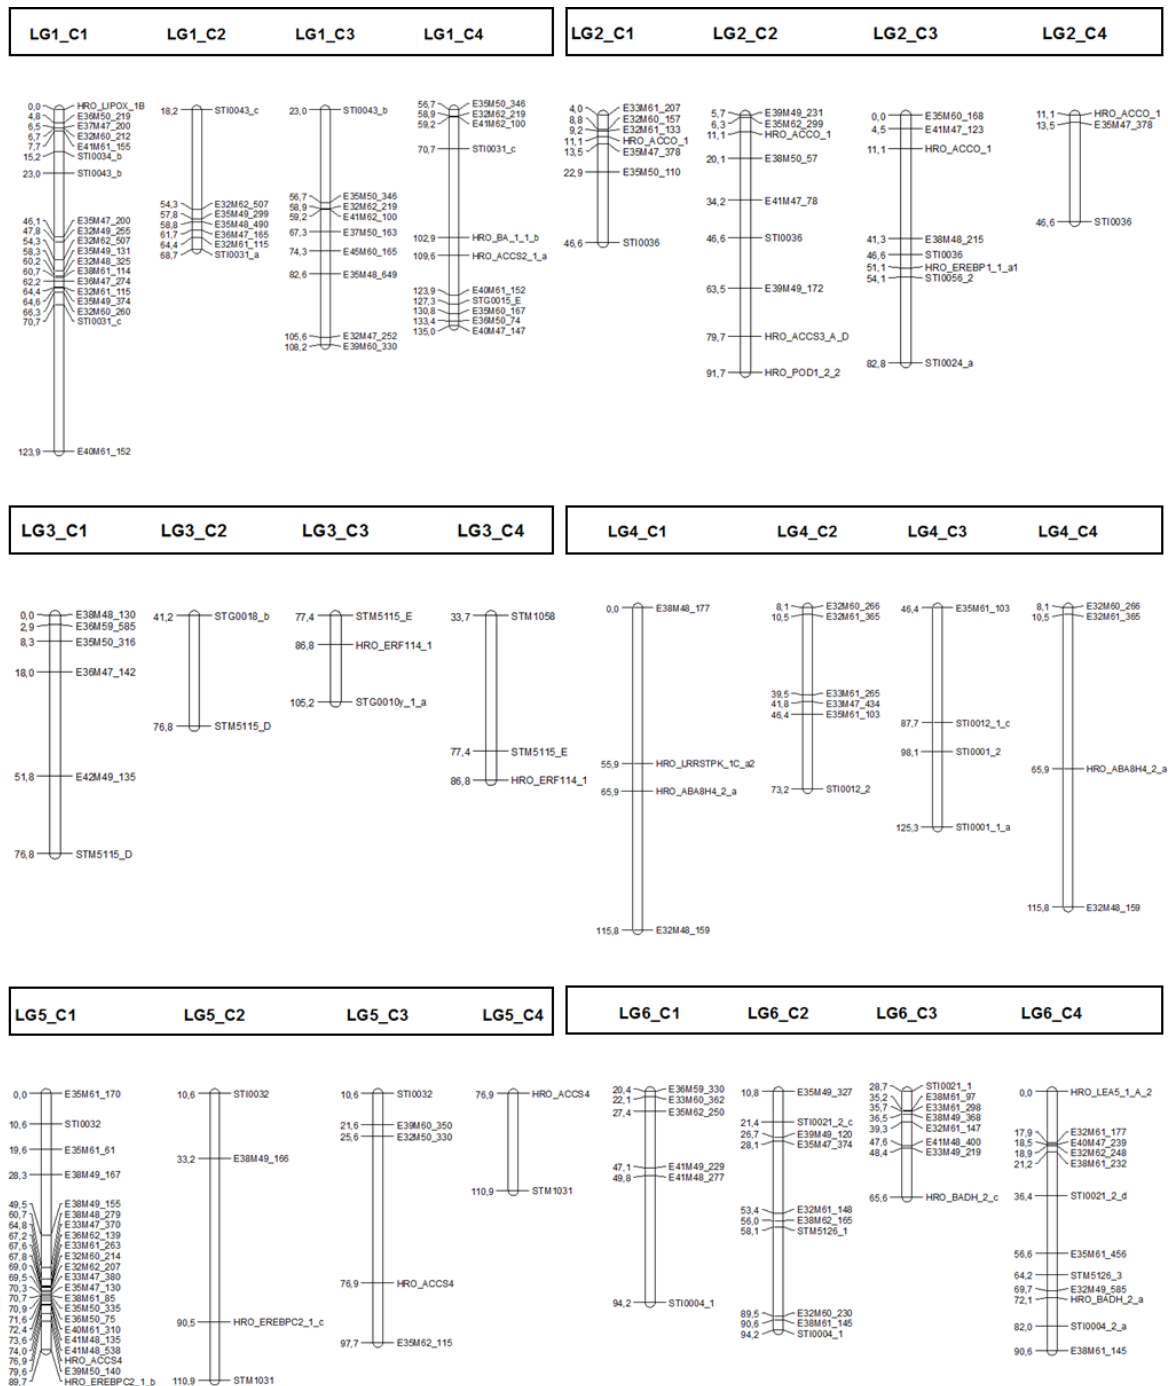

**Figure S2:** Distribution of SSR and AFLP markers on the homoeologous chromosomes of Albatros (A×R, LG 1-6)

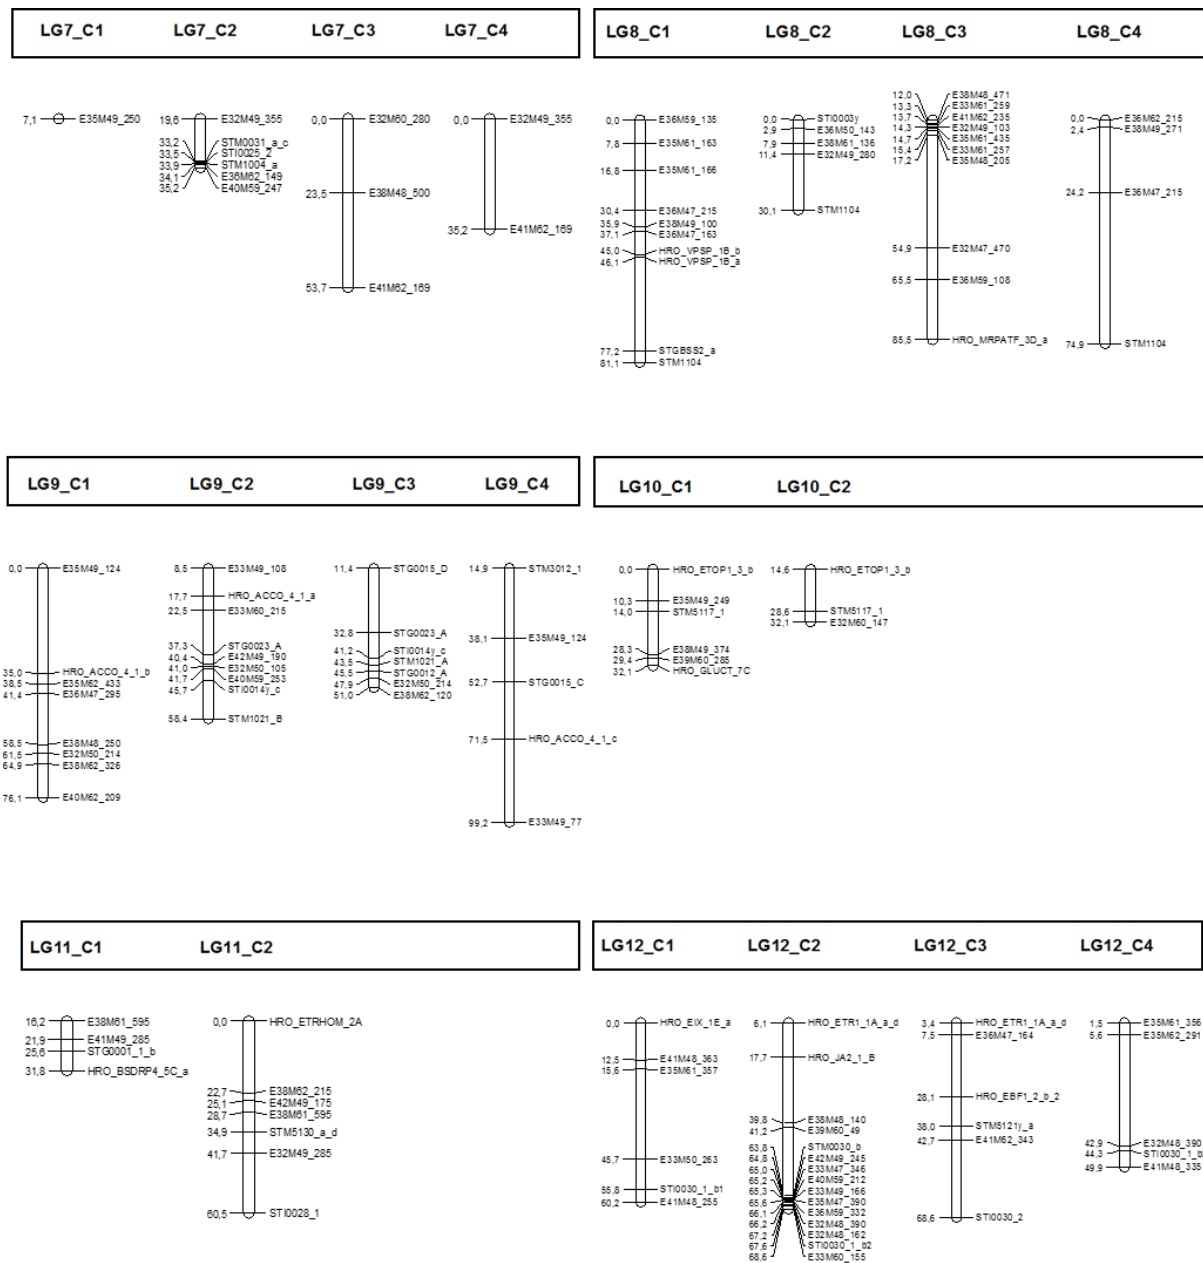

**Figure S3:** Distribution of SSR and AFLP markers on the homoeologous chromosomes of Albatros (A×R, LG 7-12)

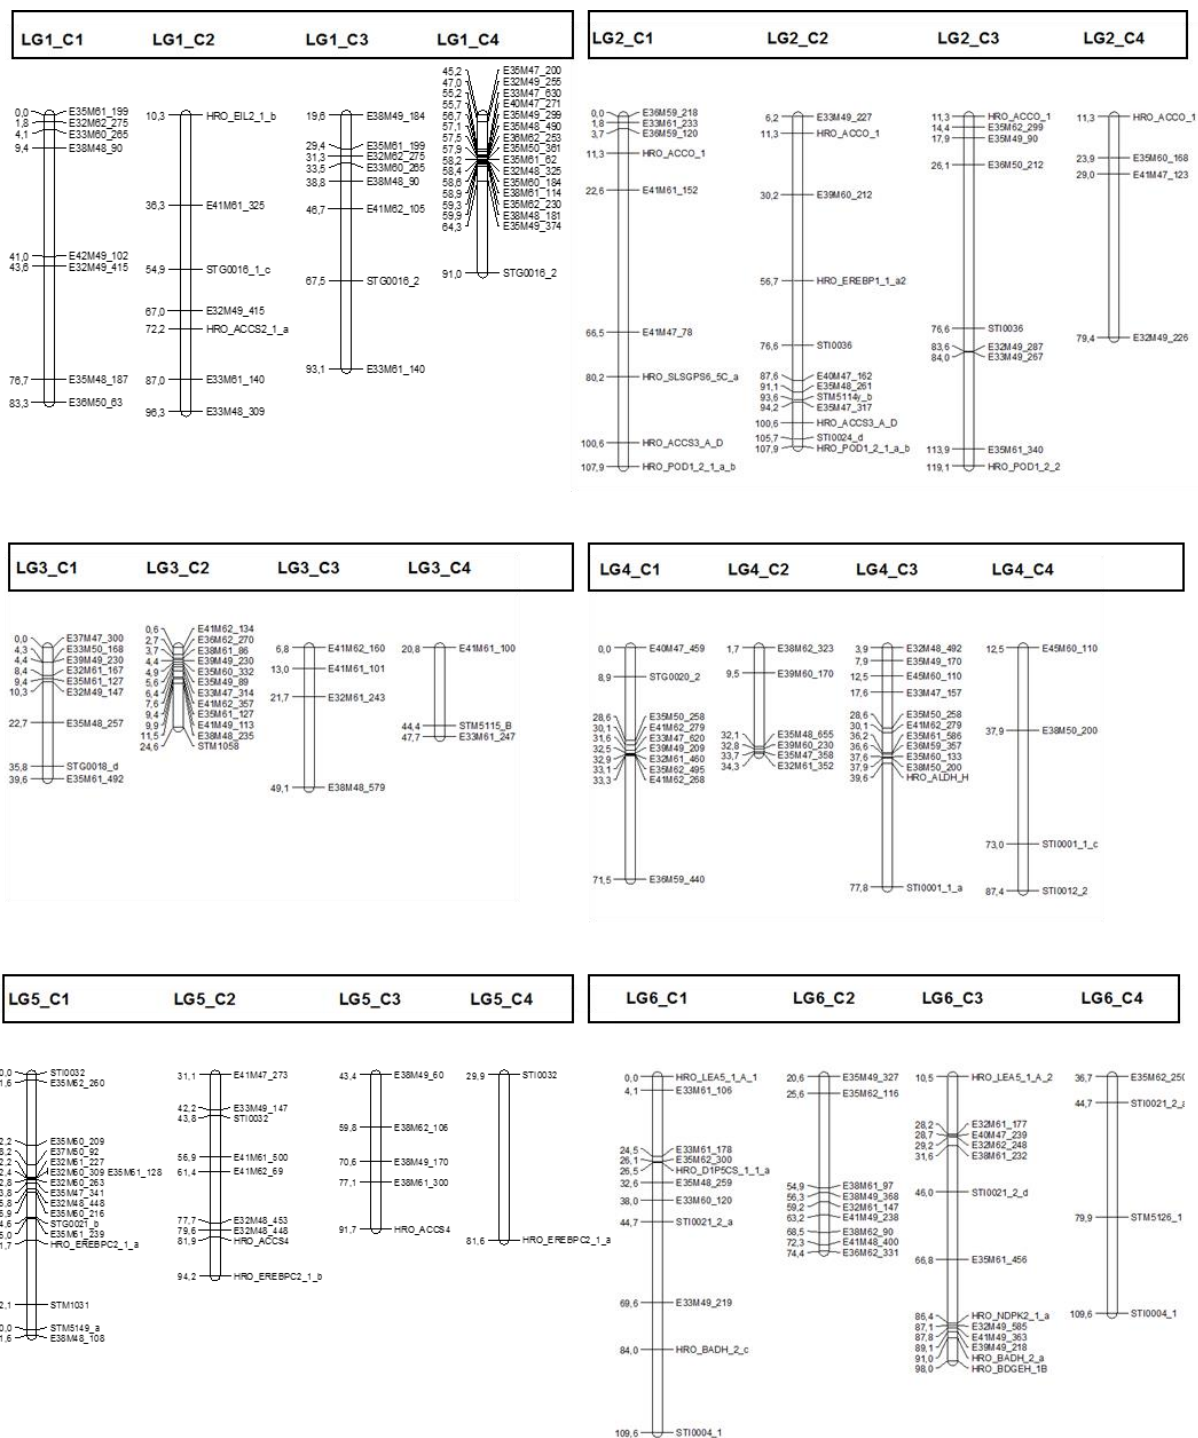

**Figure S4:** Distribution of SSR and AFLP markers on the homoeologous chromosomes of Ramses (A×R, LG 1-6)

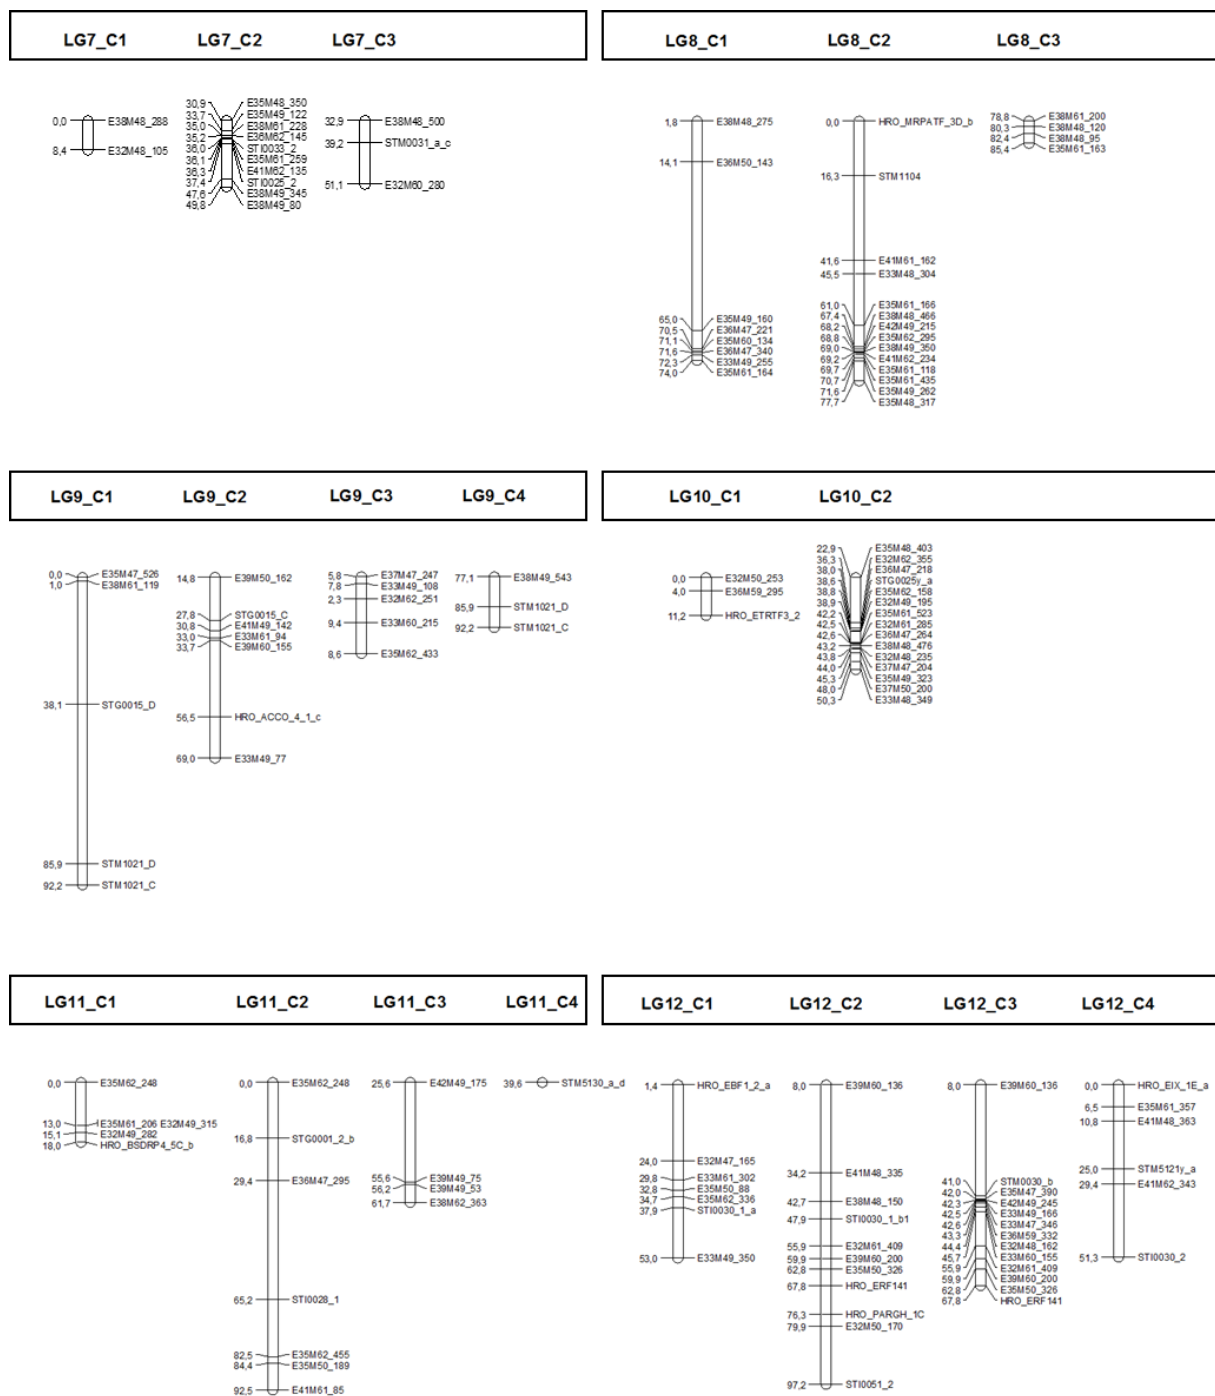

**Figure S5:** Distribution of SSR and AFLP markers on the homoeologous chromosomes of Ramses (A×R, LG 7-12)





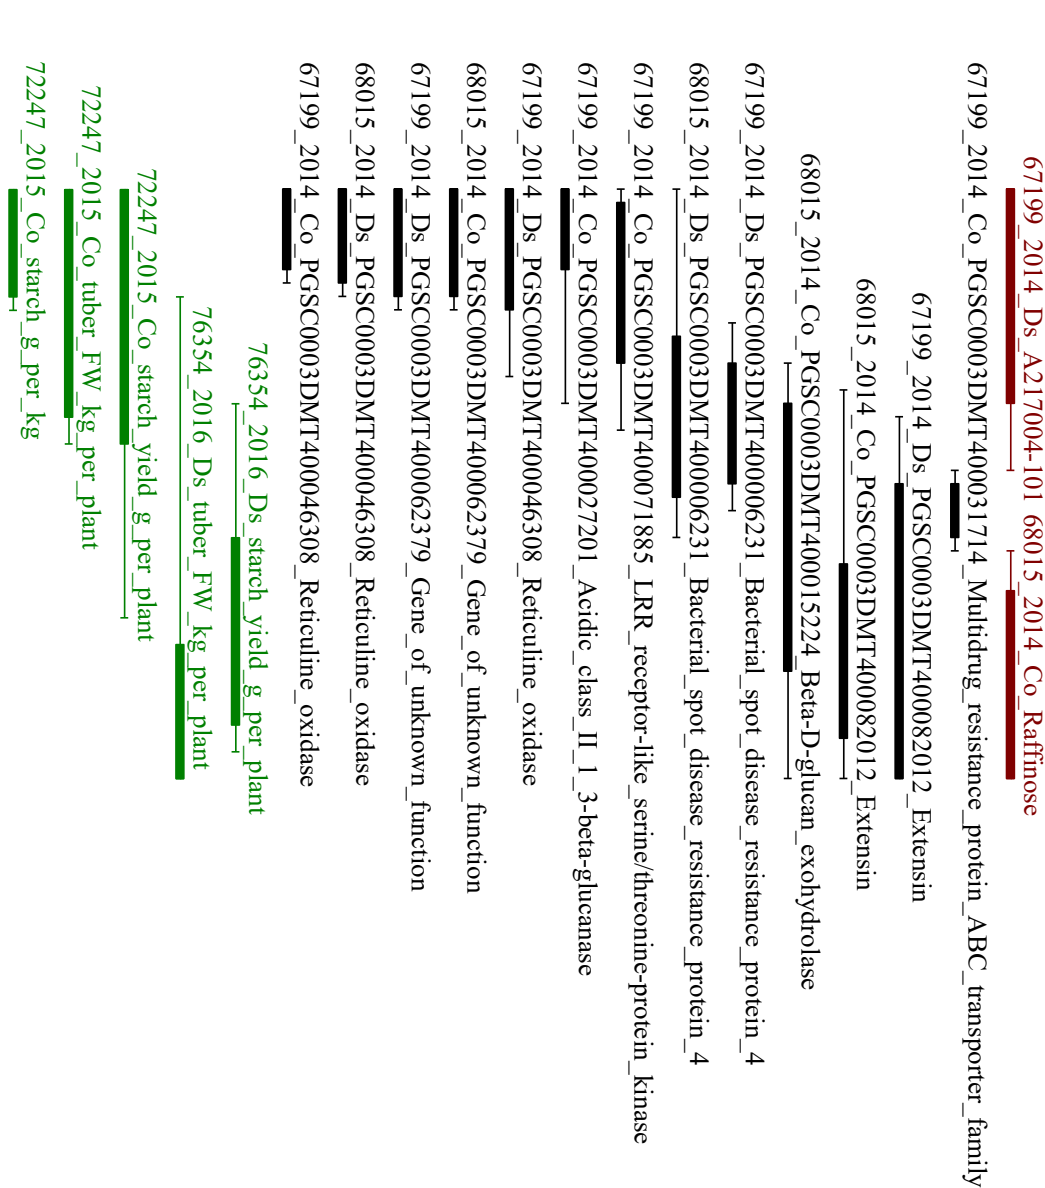

LG2 A

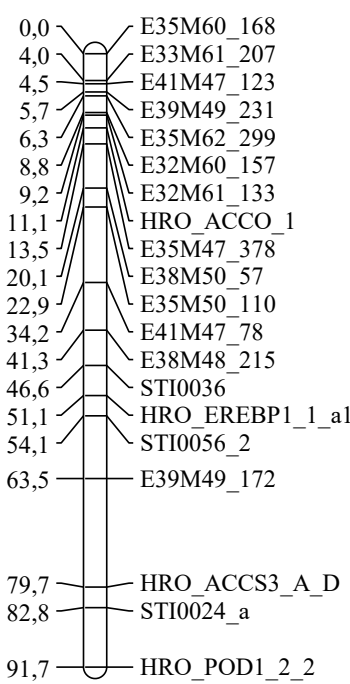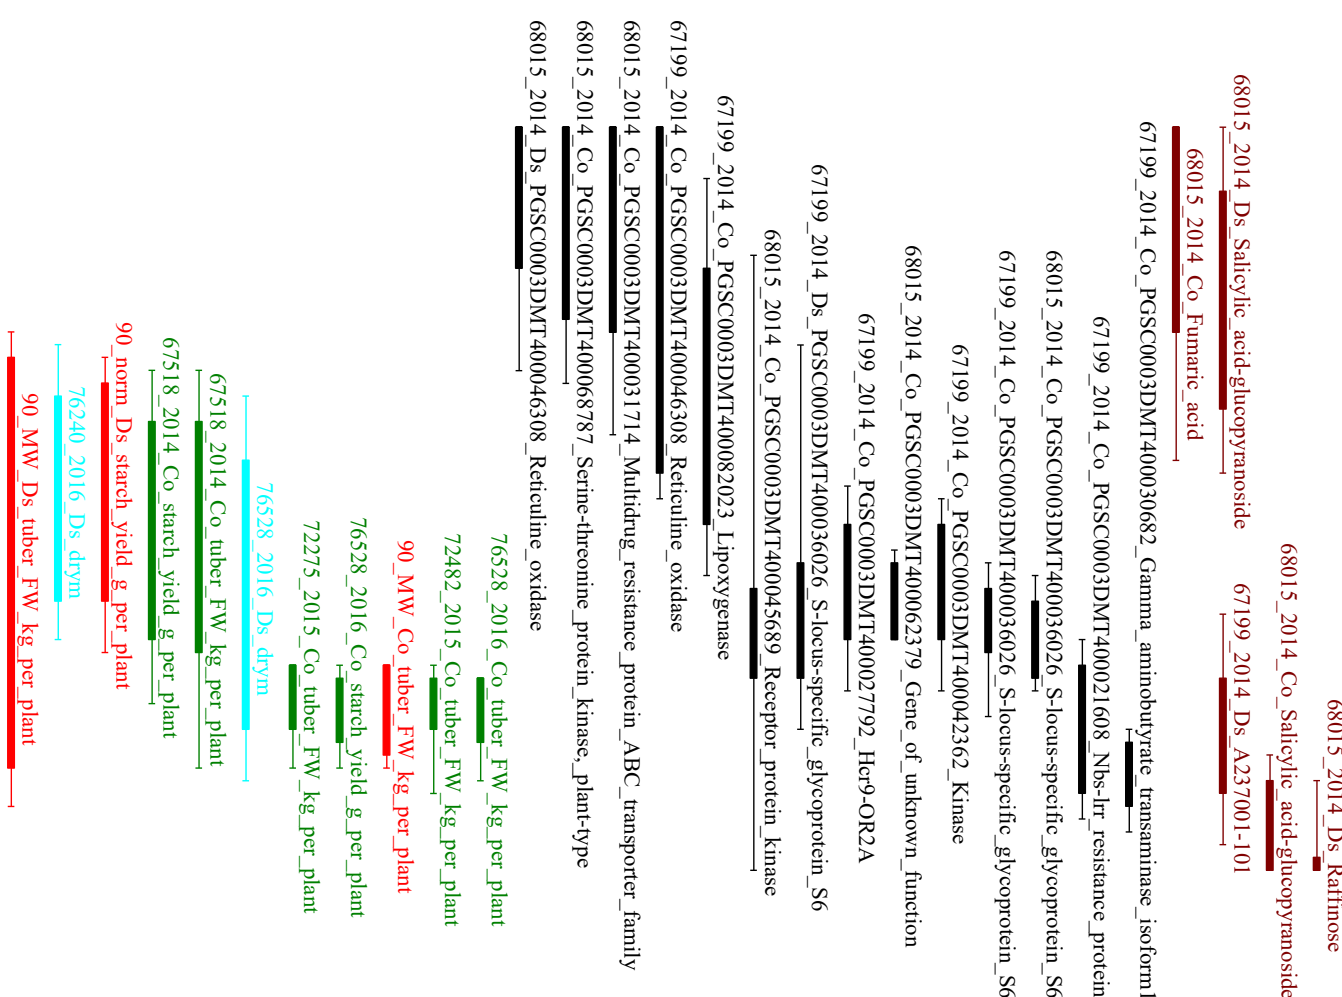

LG2 R

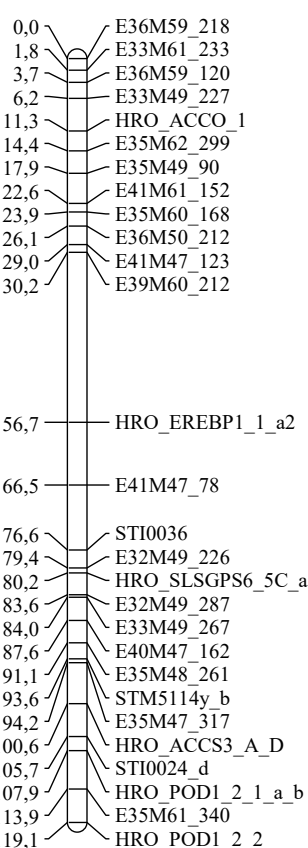



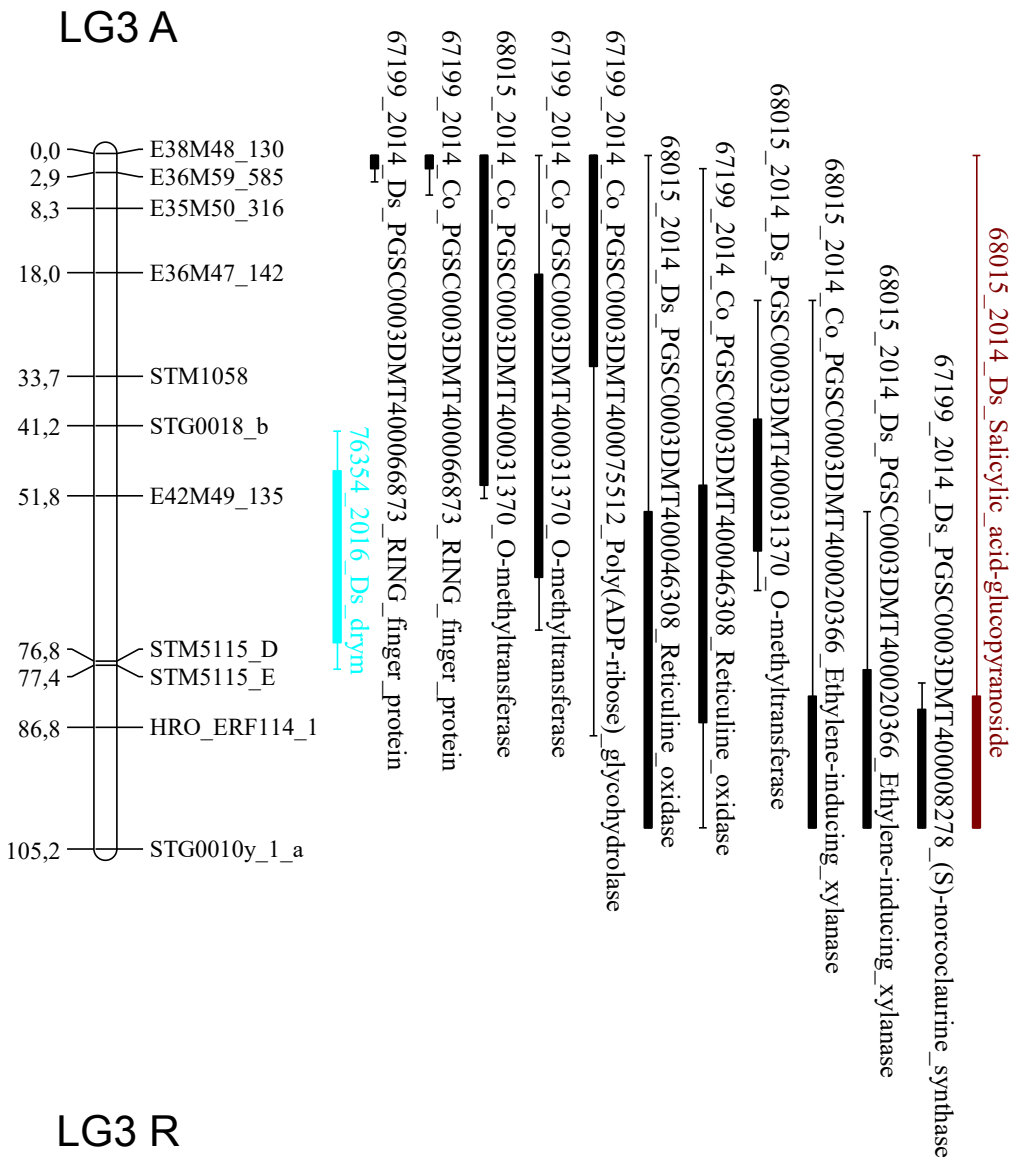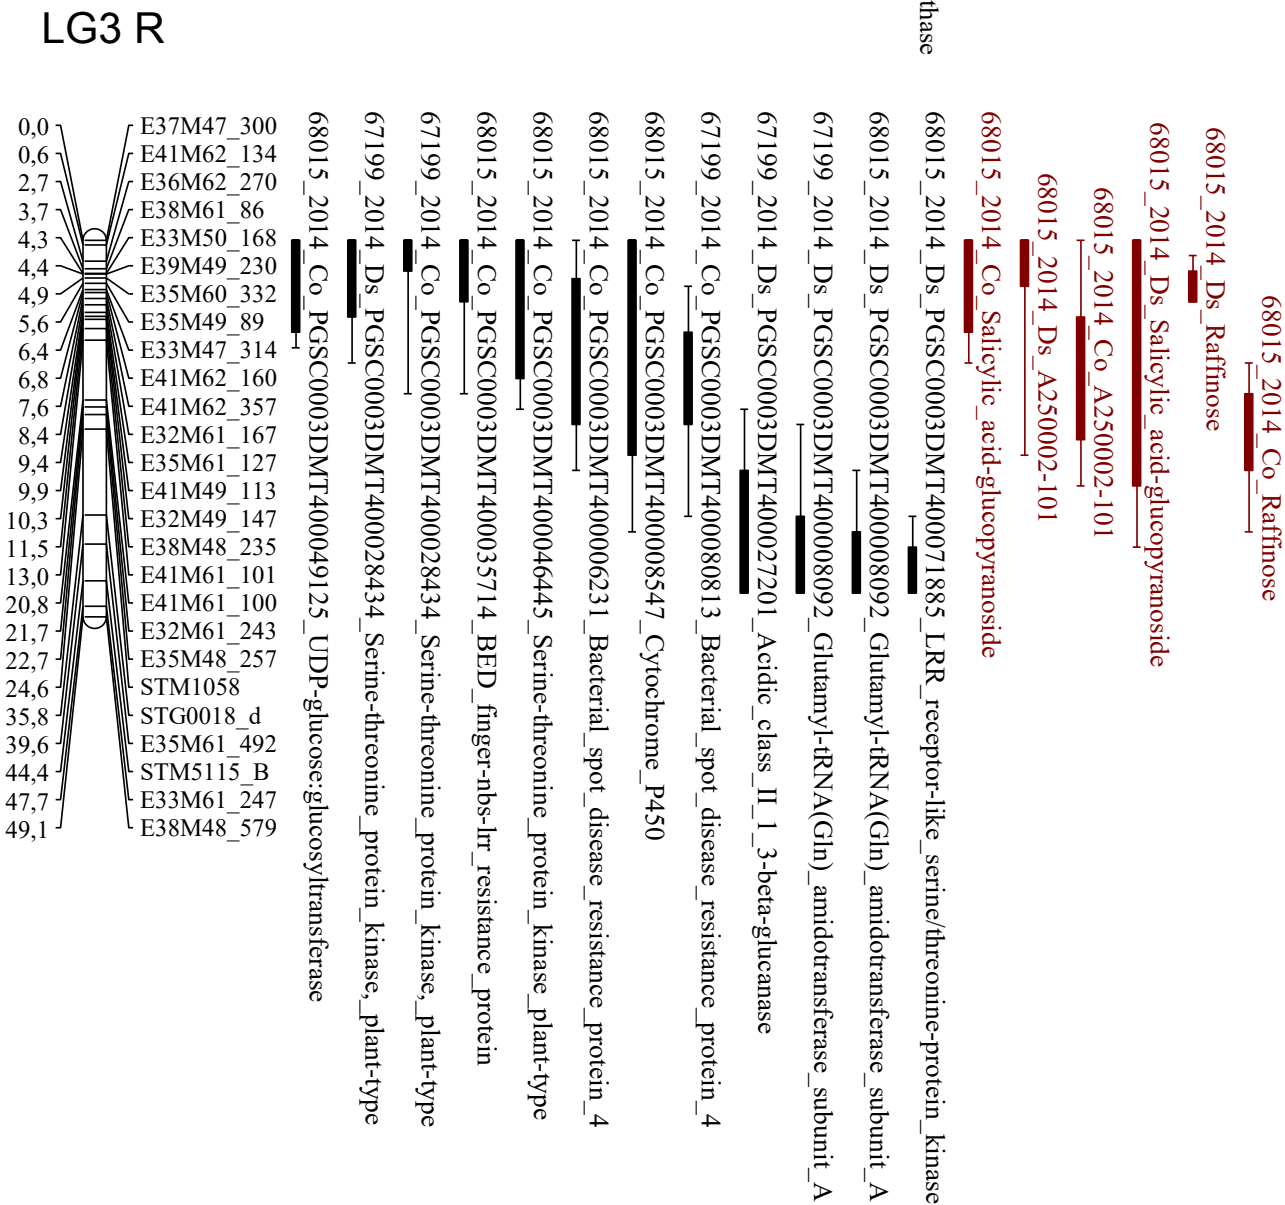

LG4 A

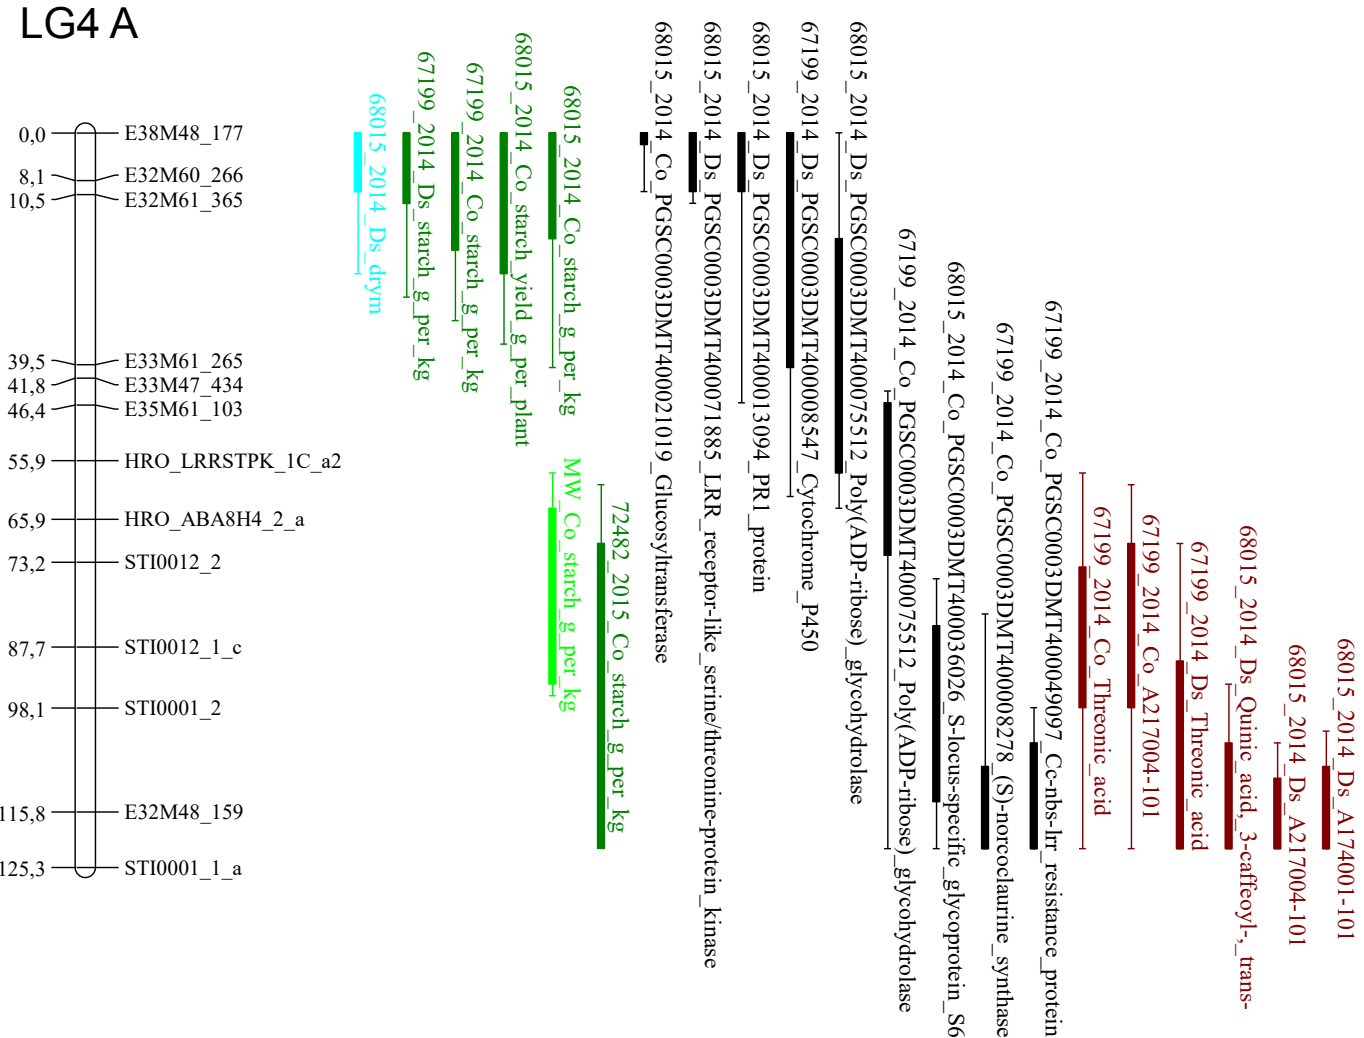

LG4 R

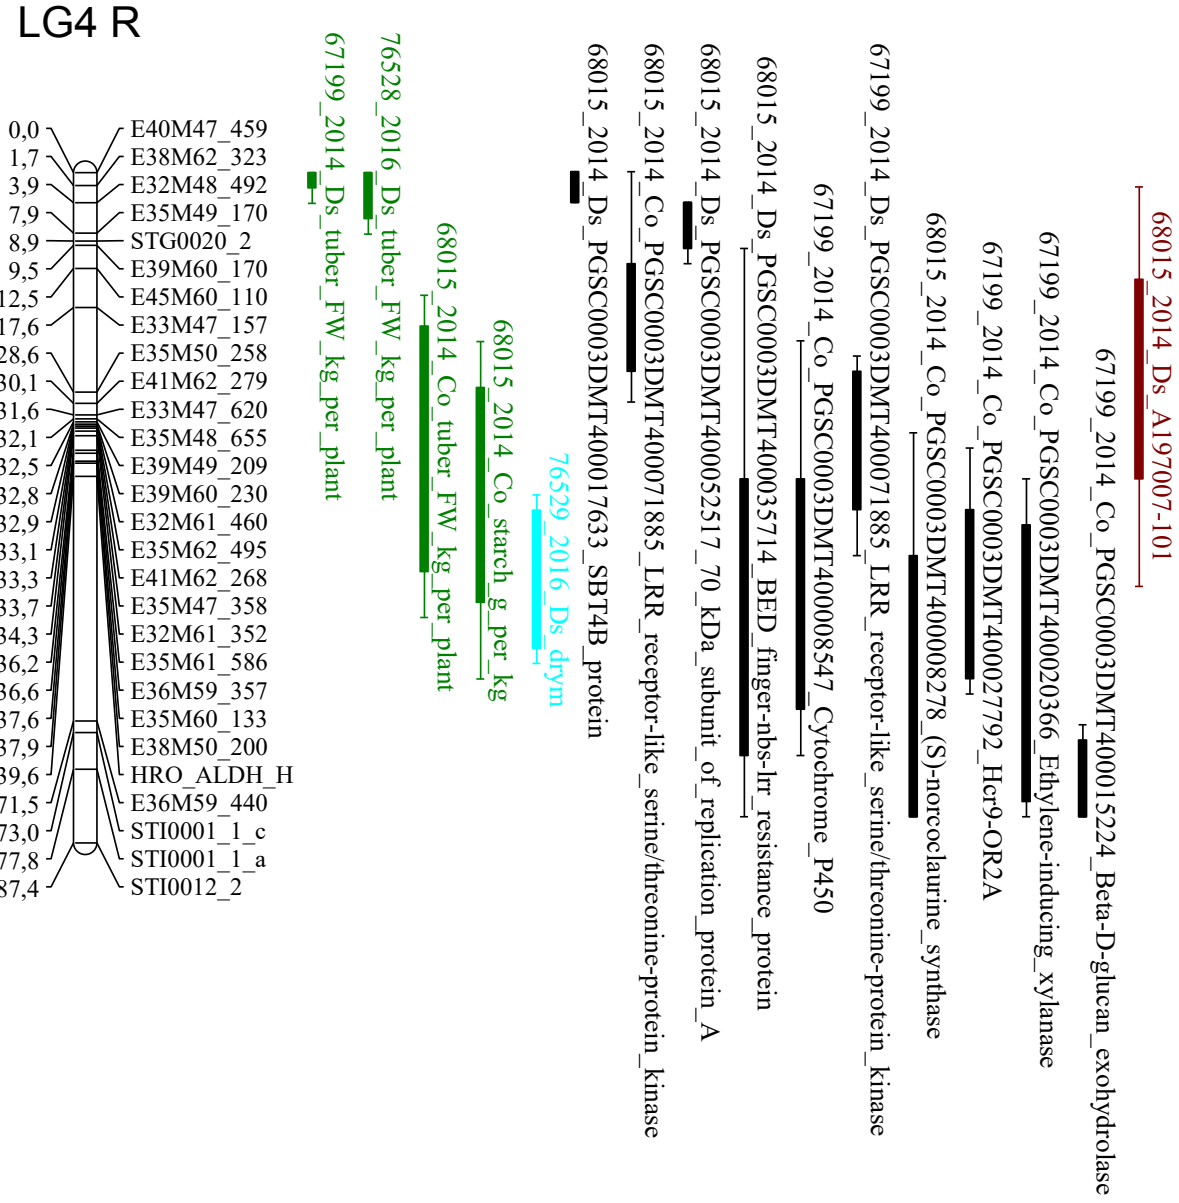

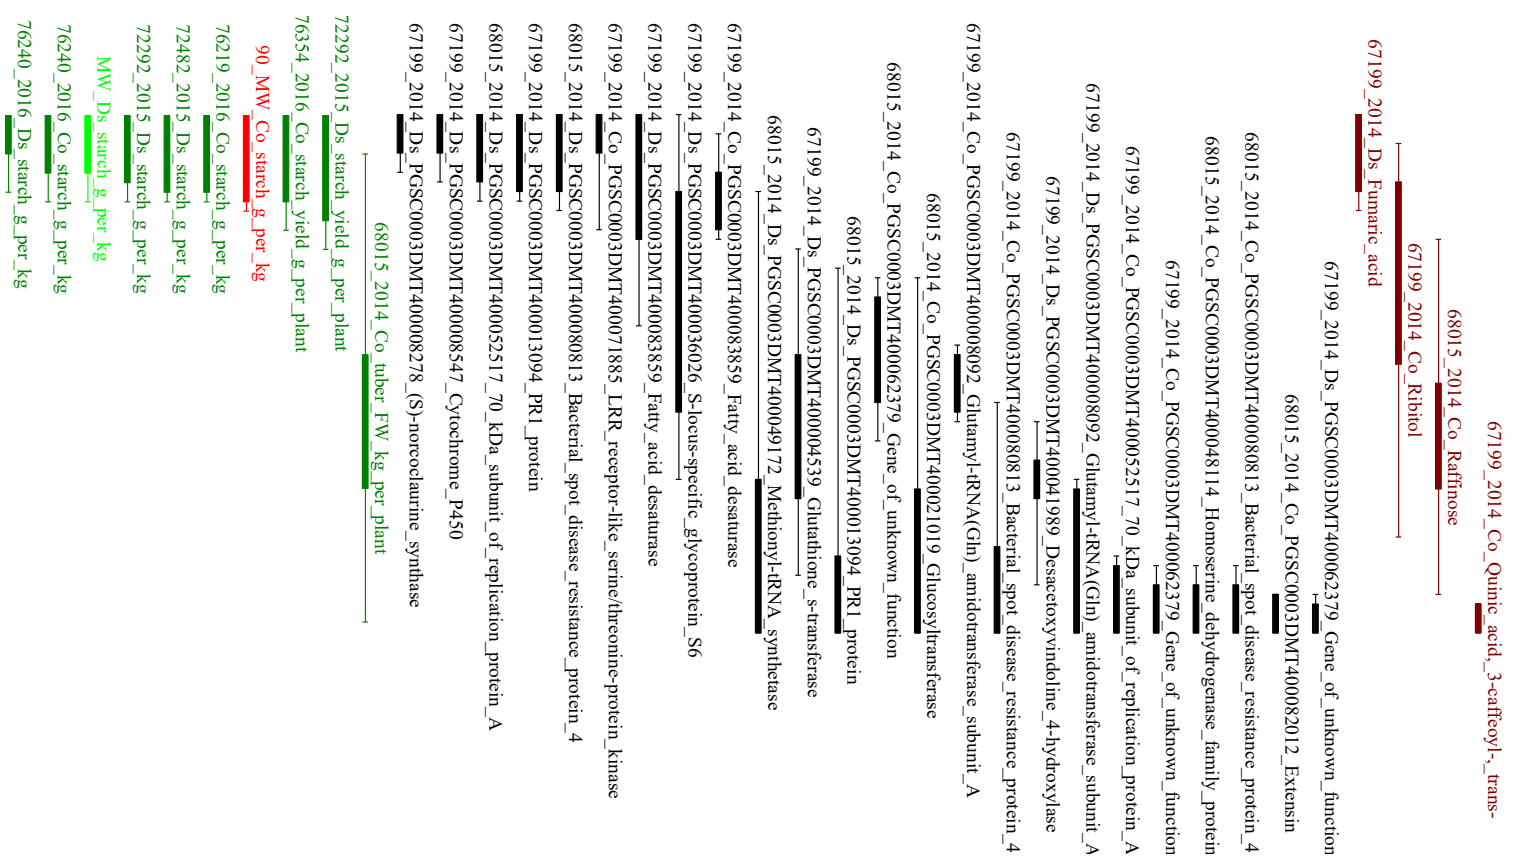

LG5 A

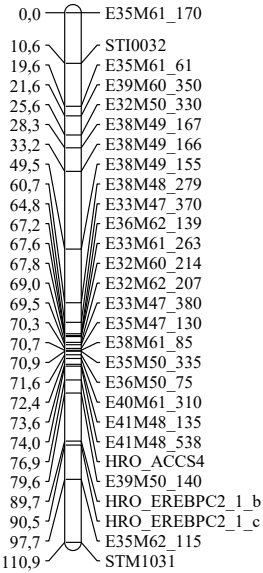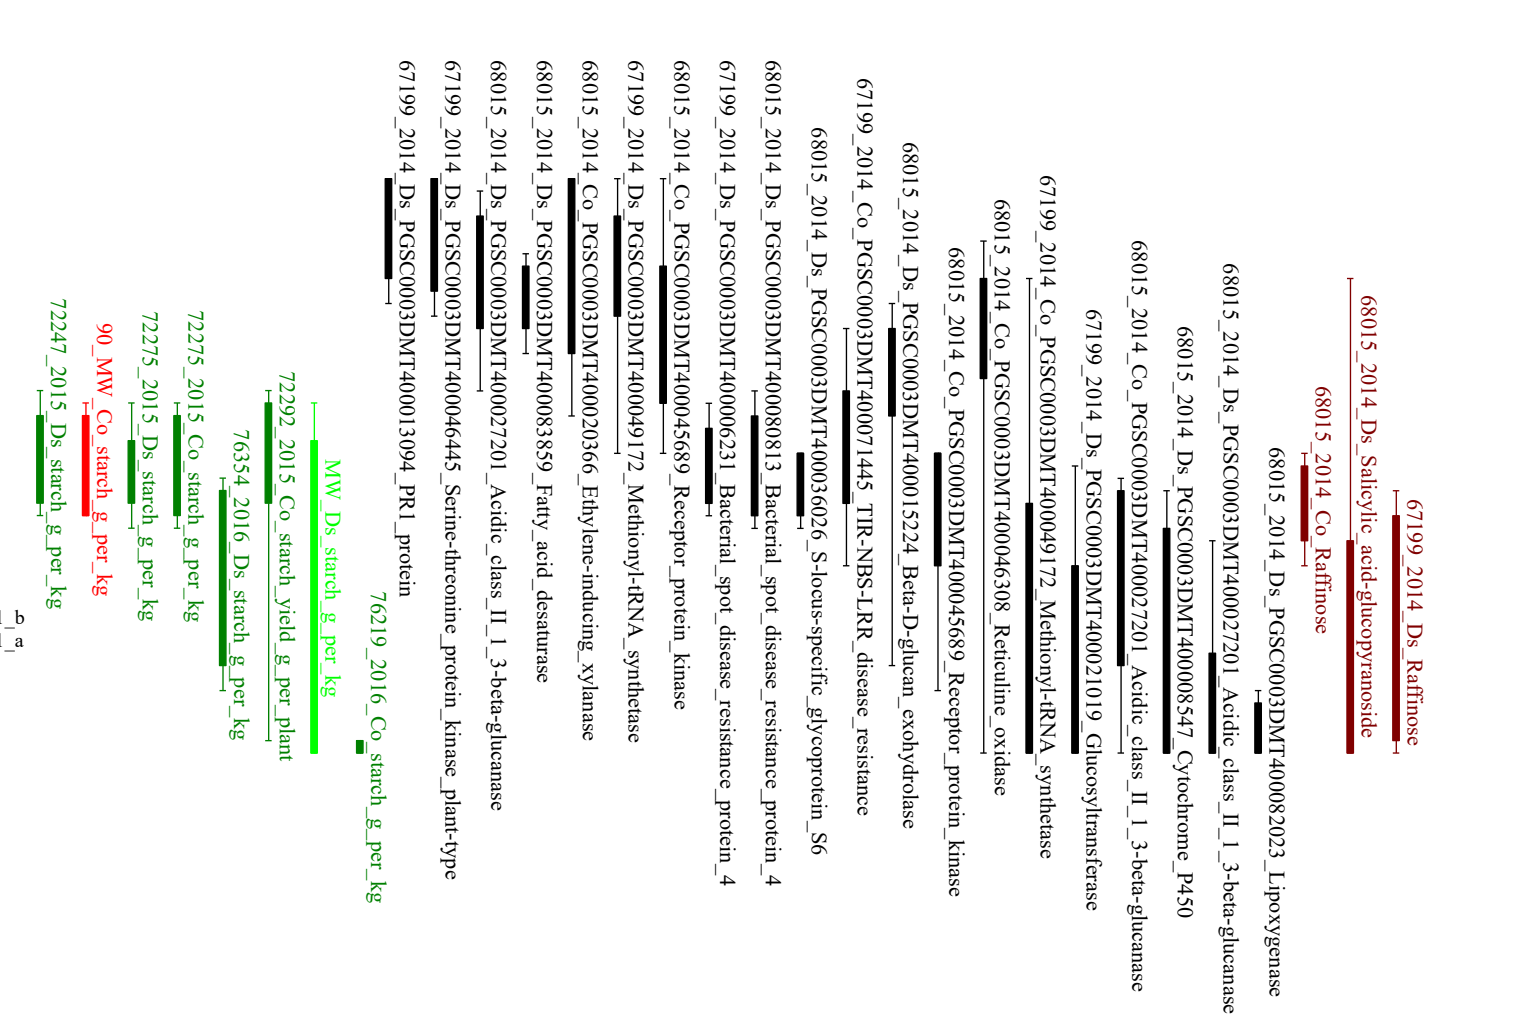

LG5 R

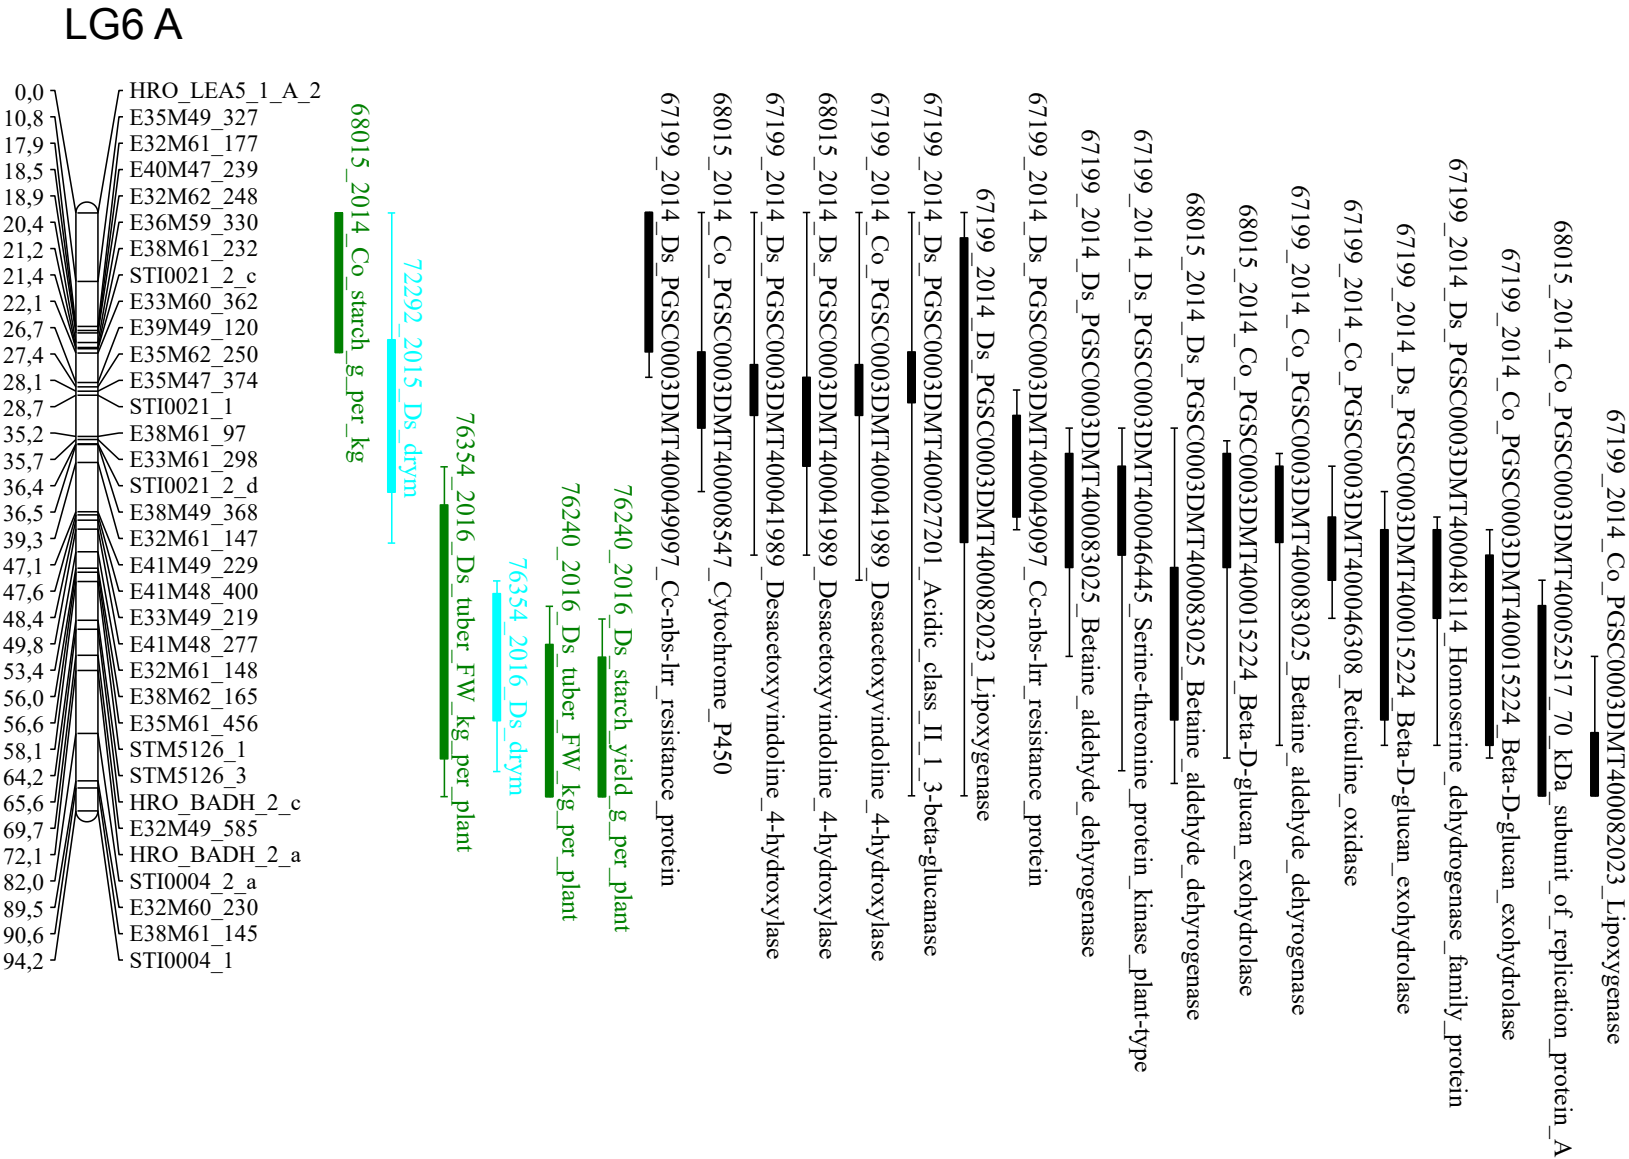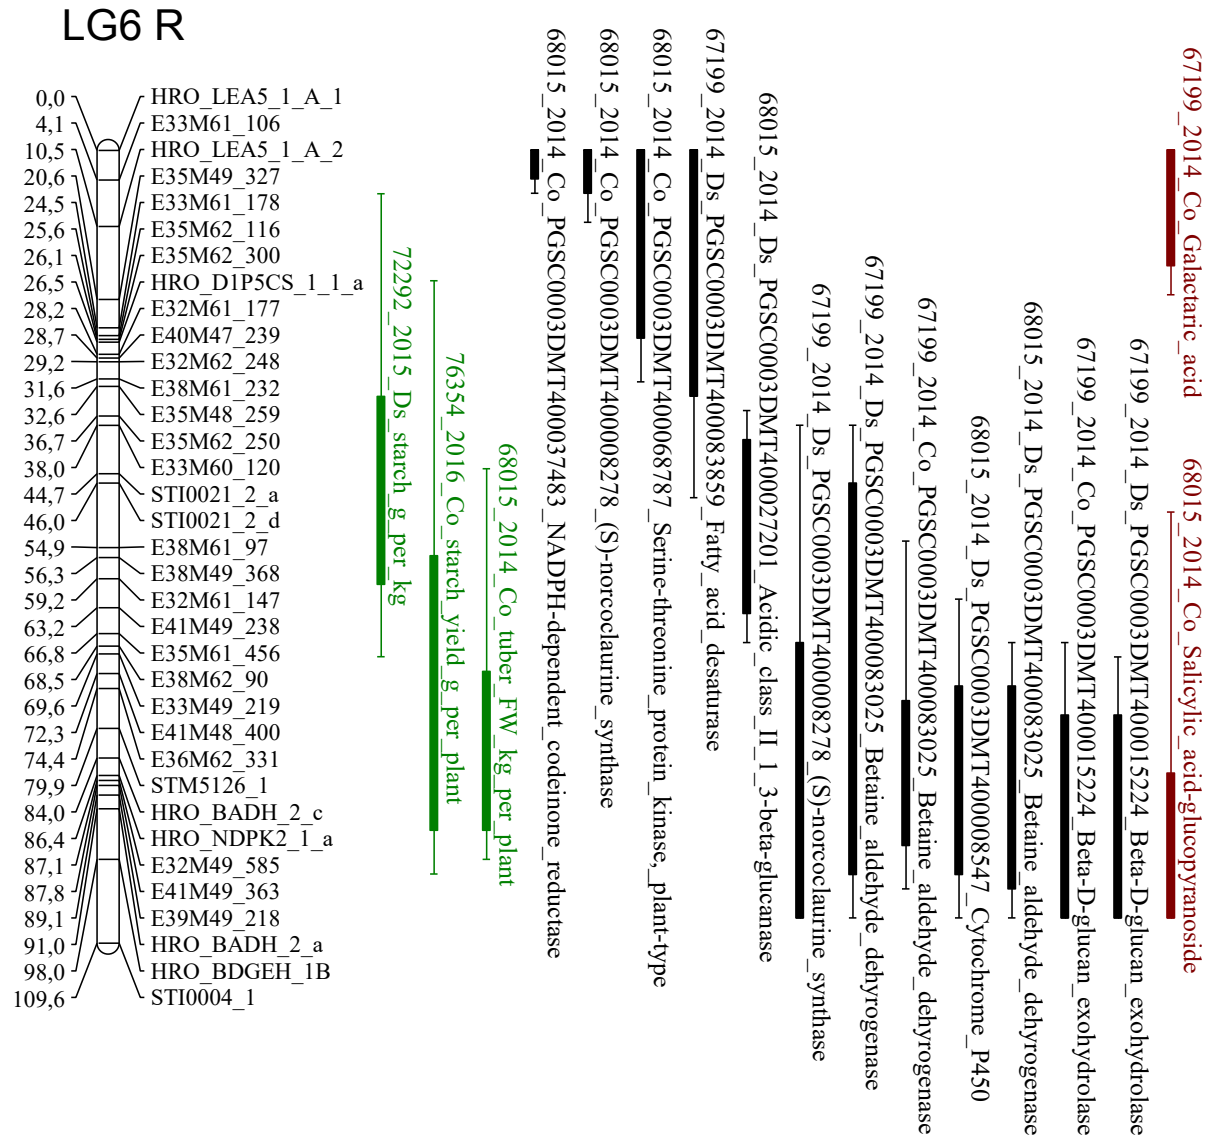



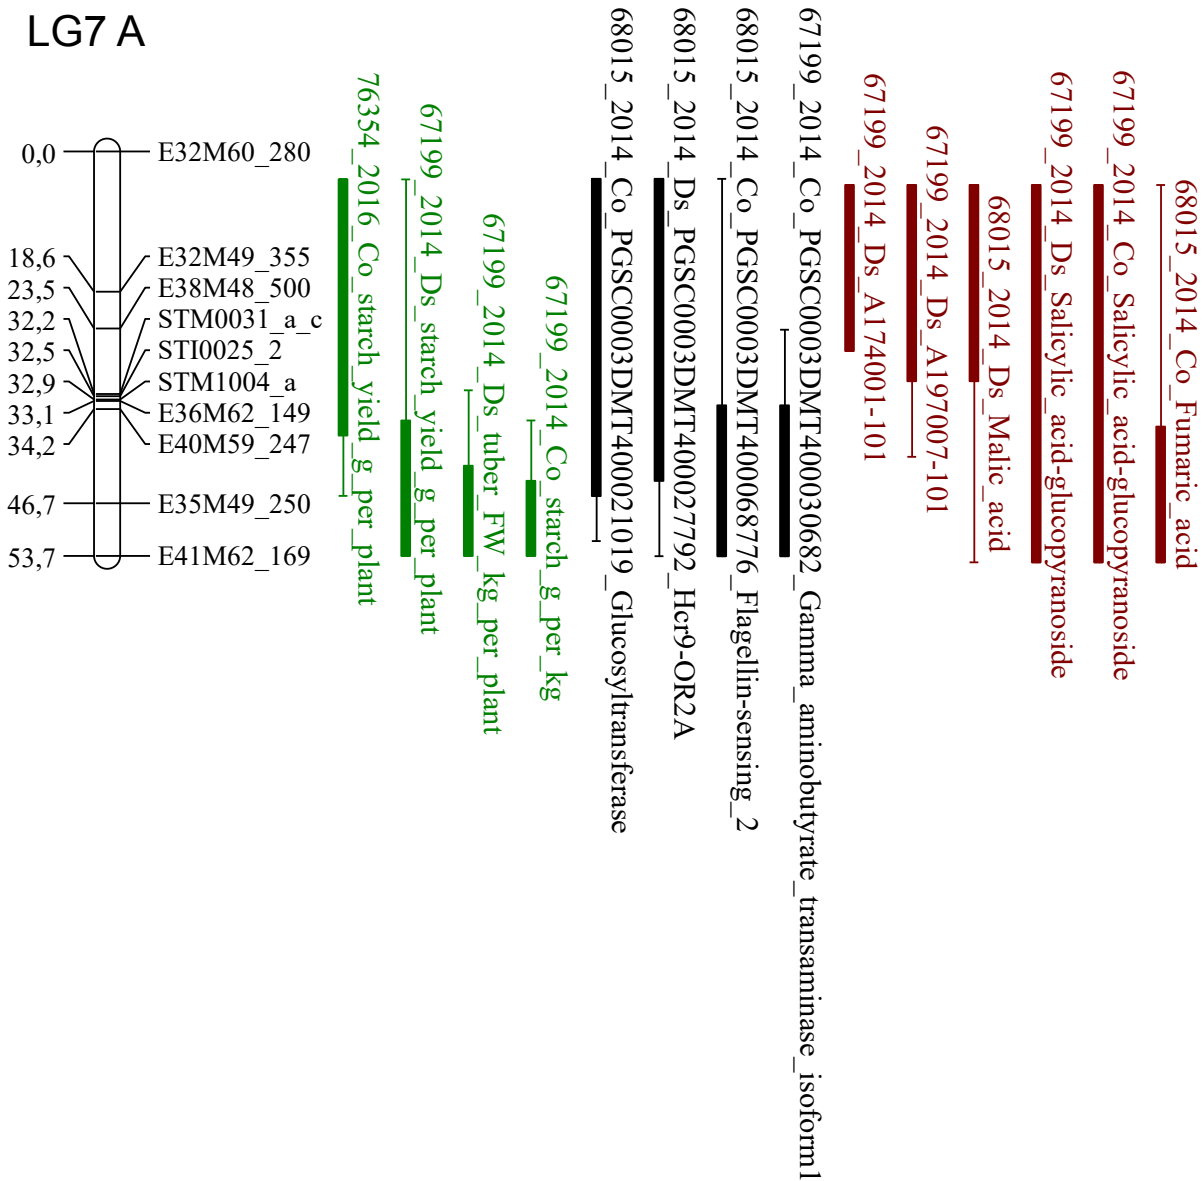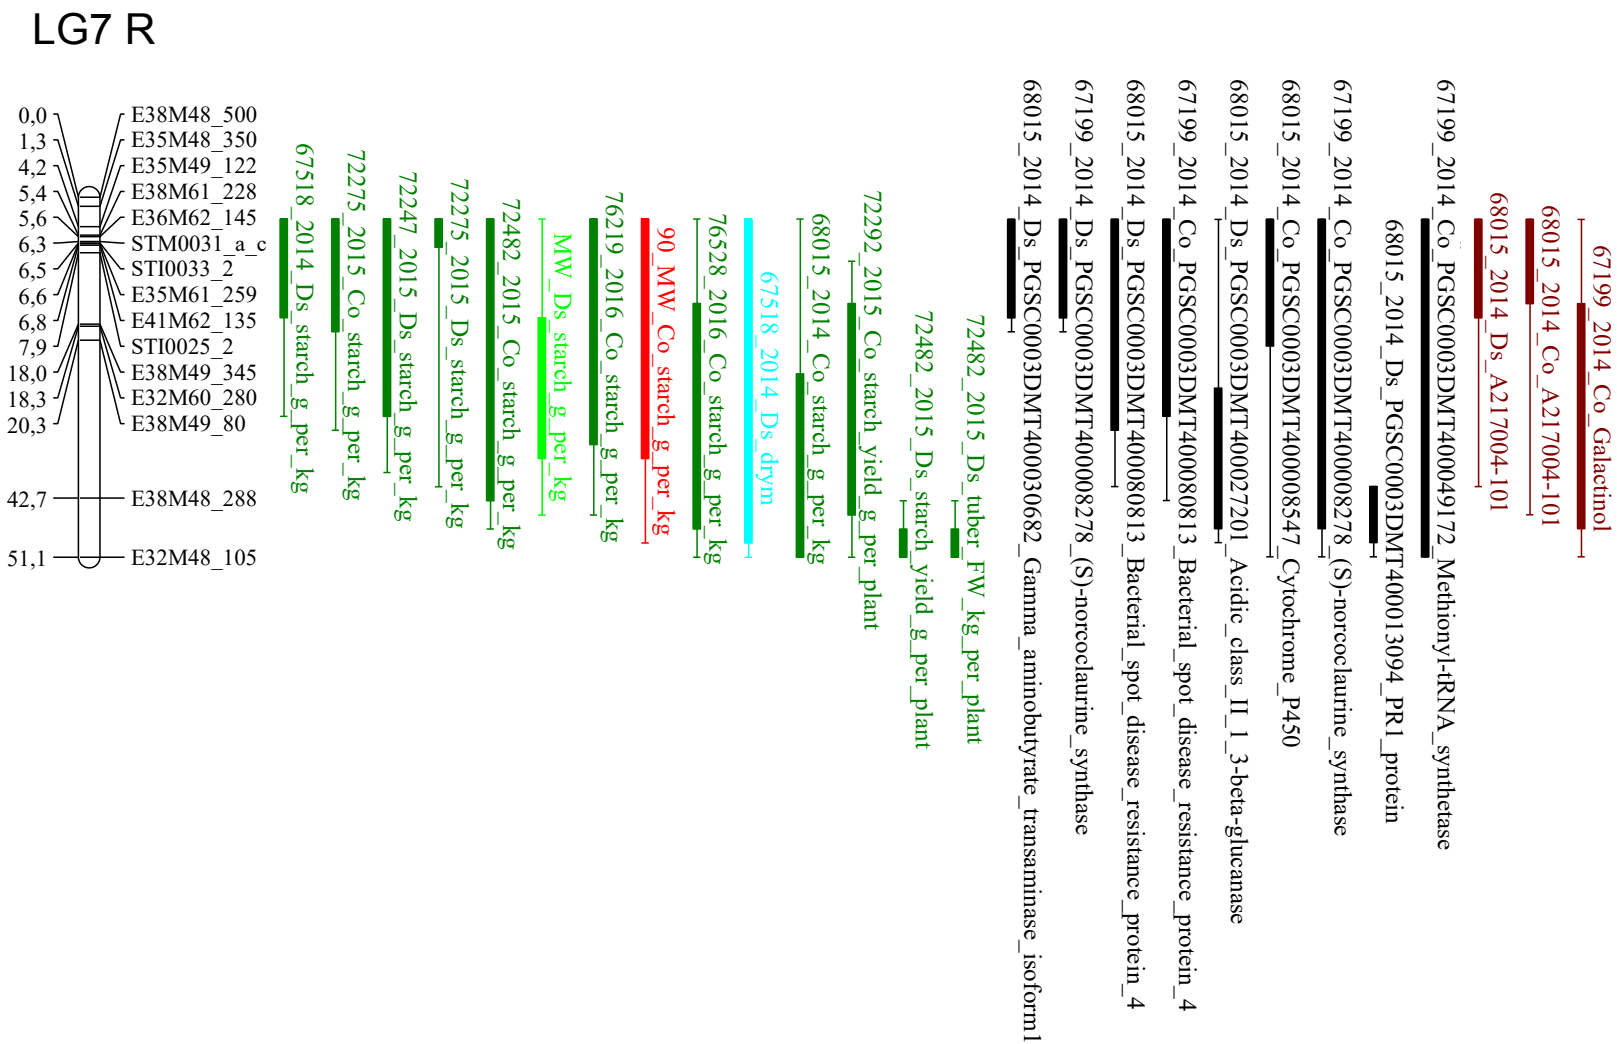



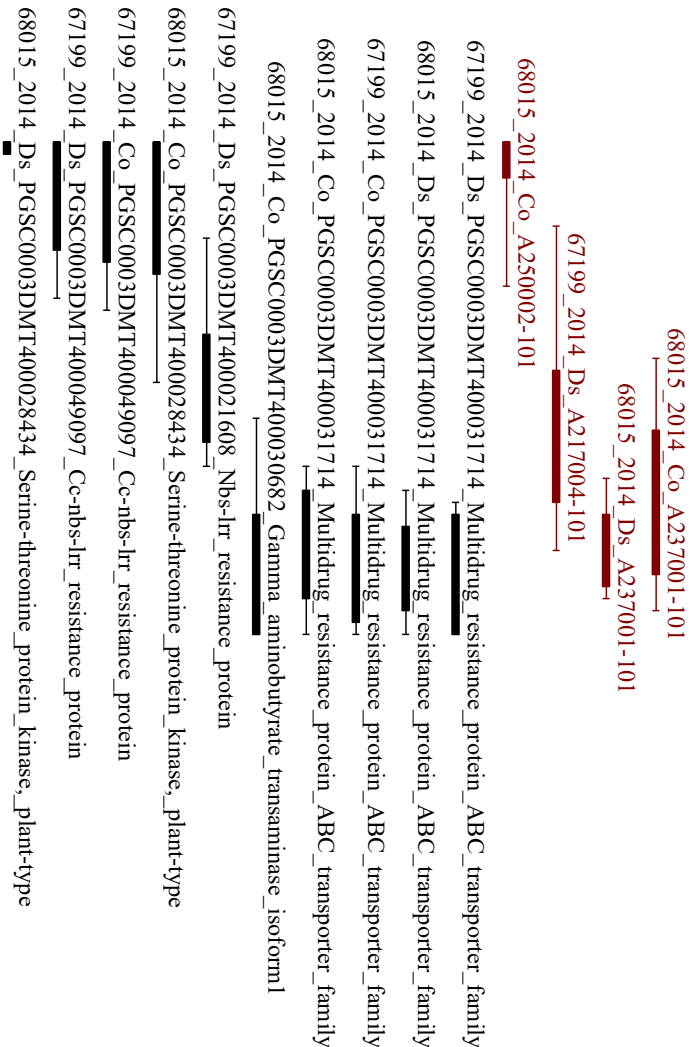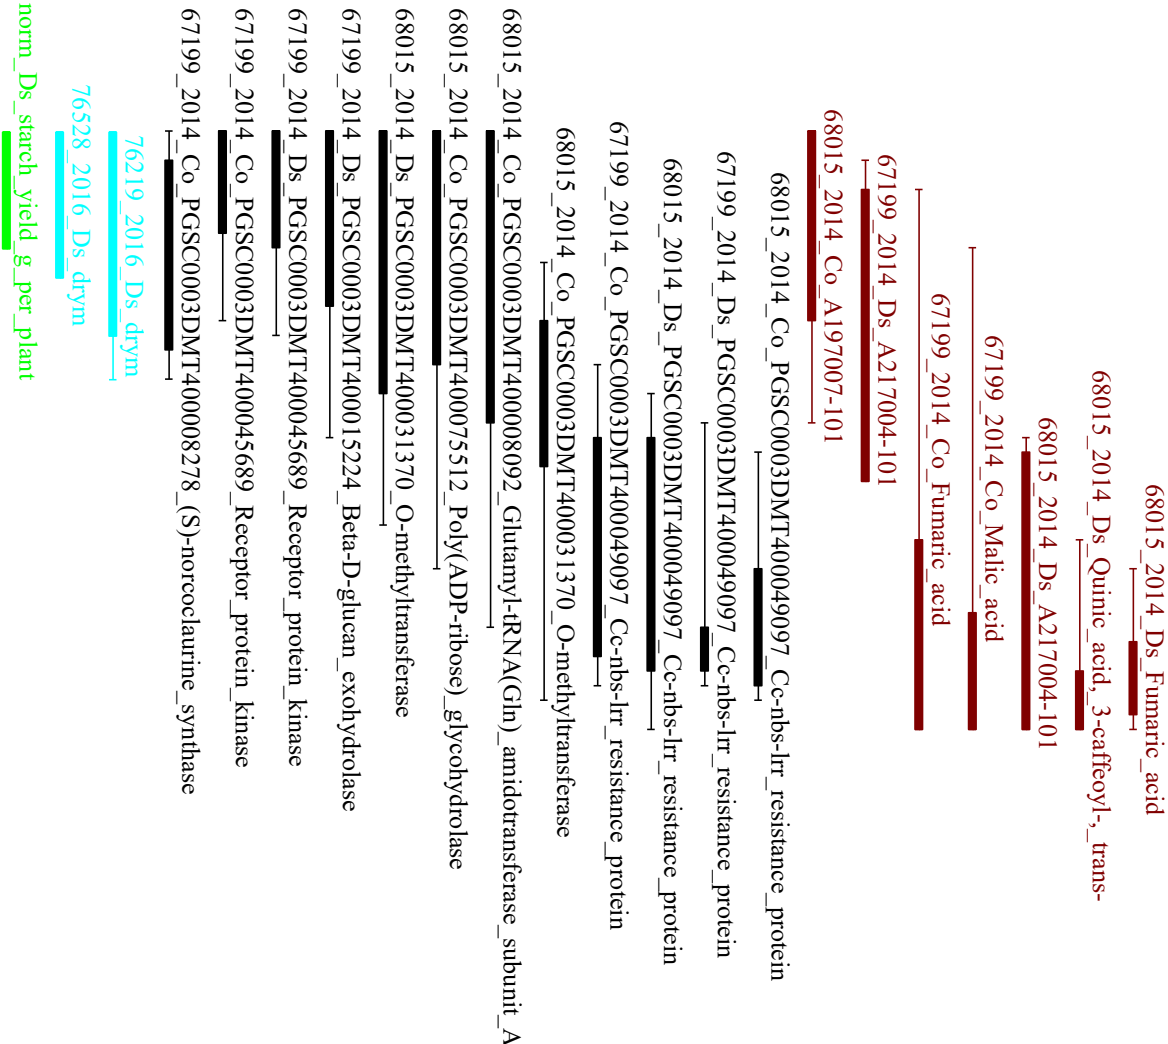

## LG8 A

## LG8 R

LG9 A

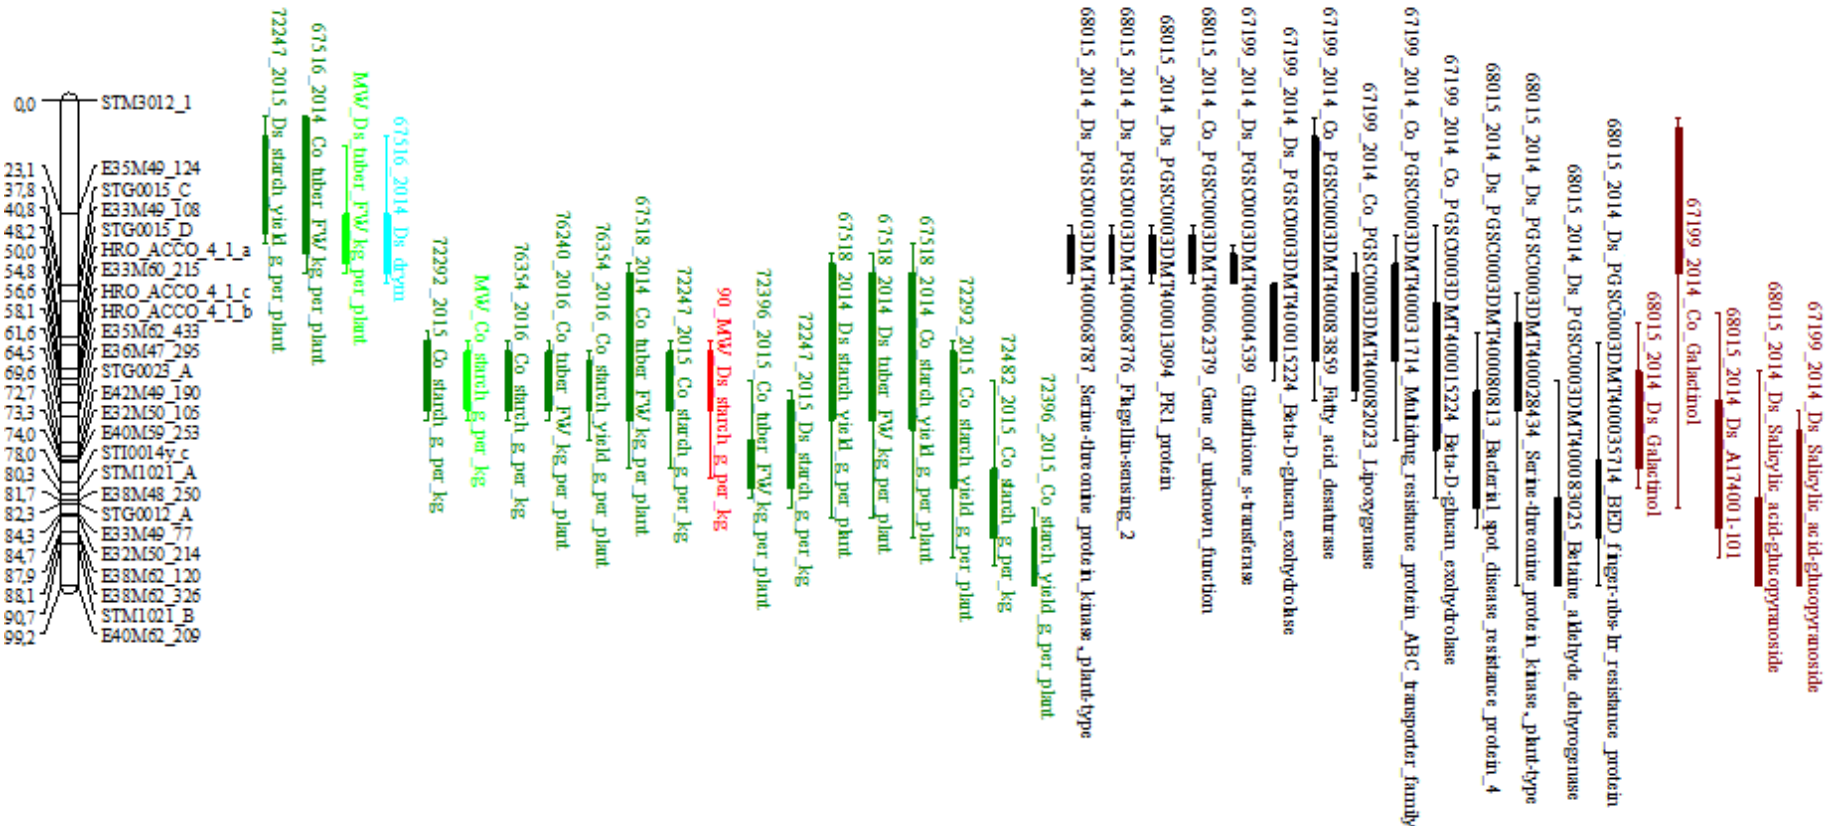

LG9 R

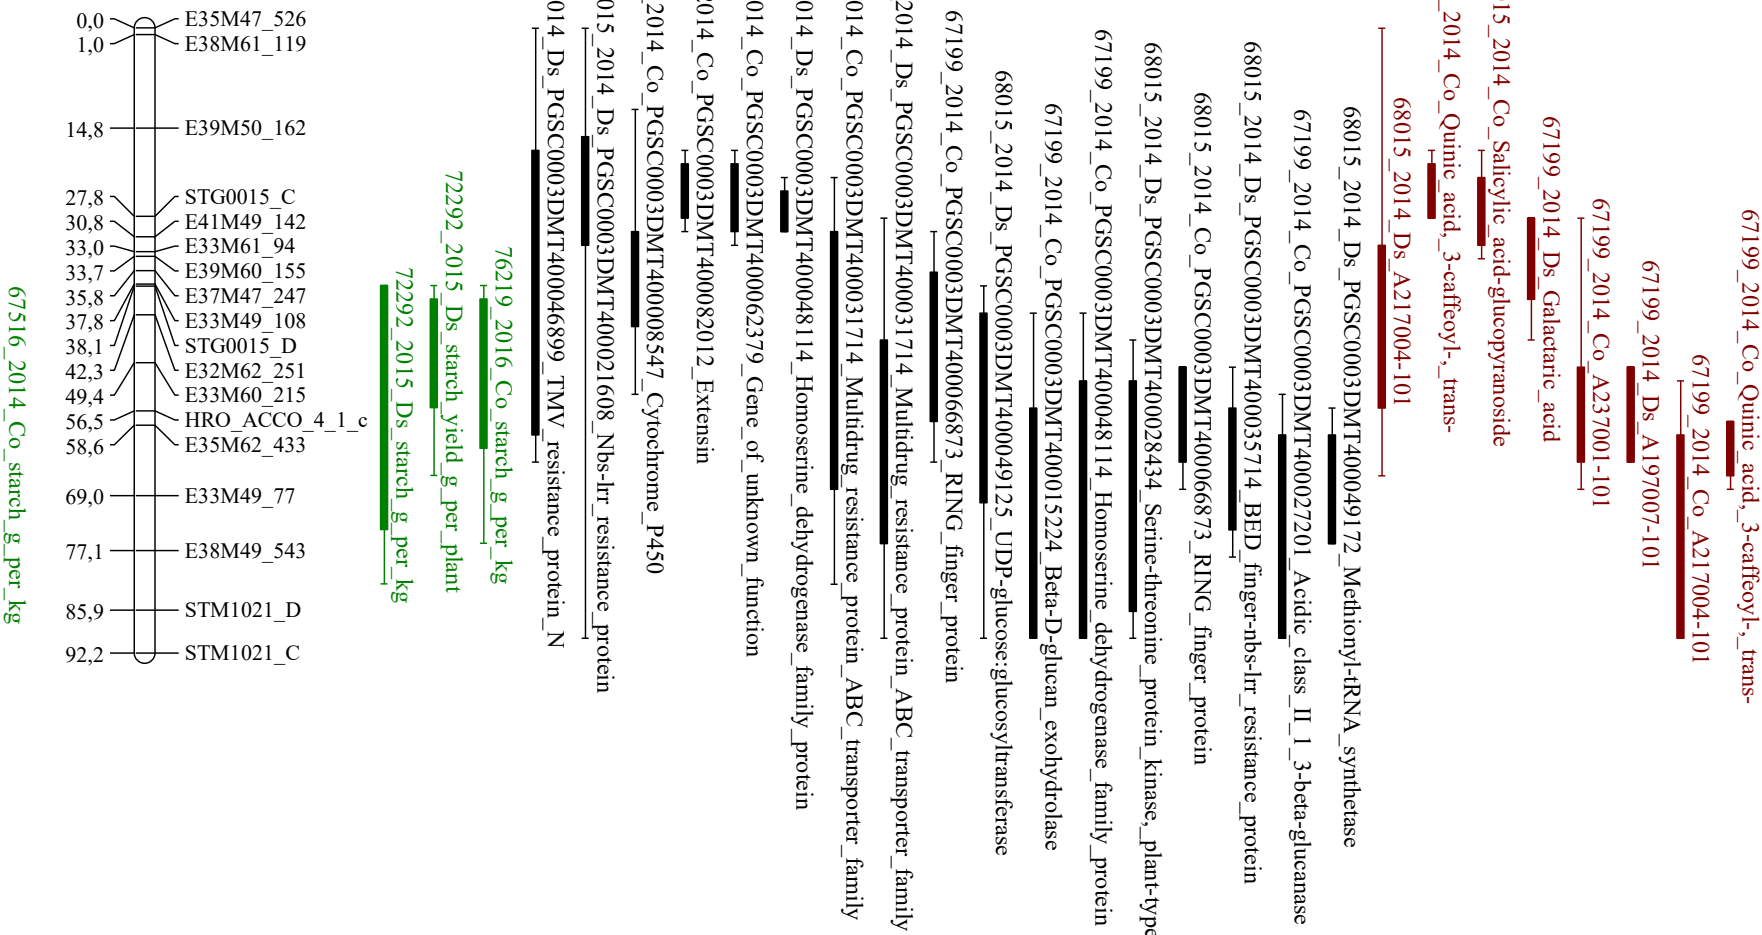

LG10 A

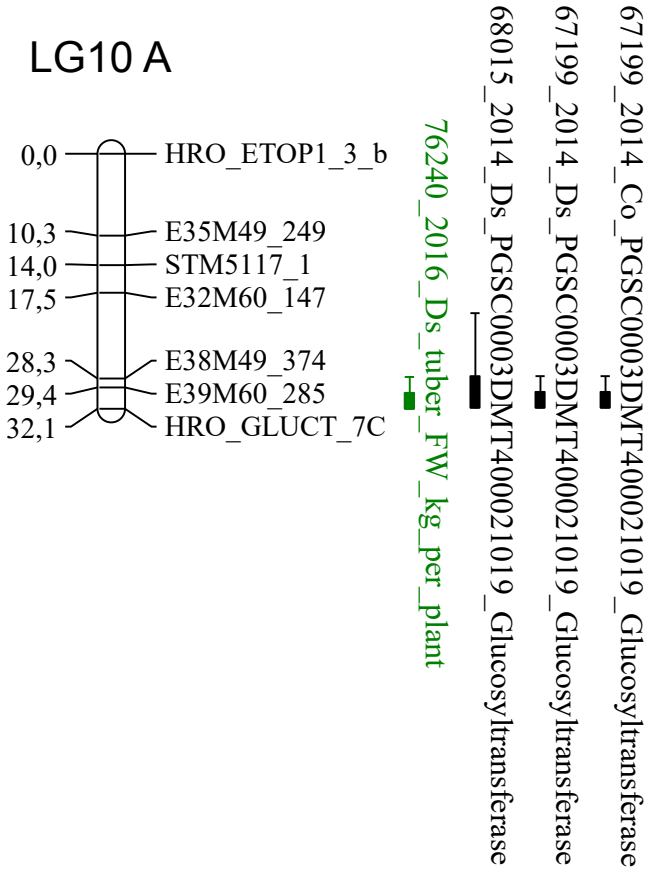

LG10 R

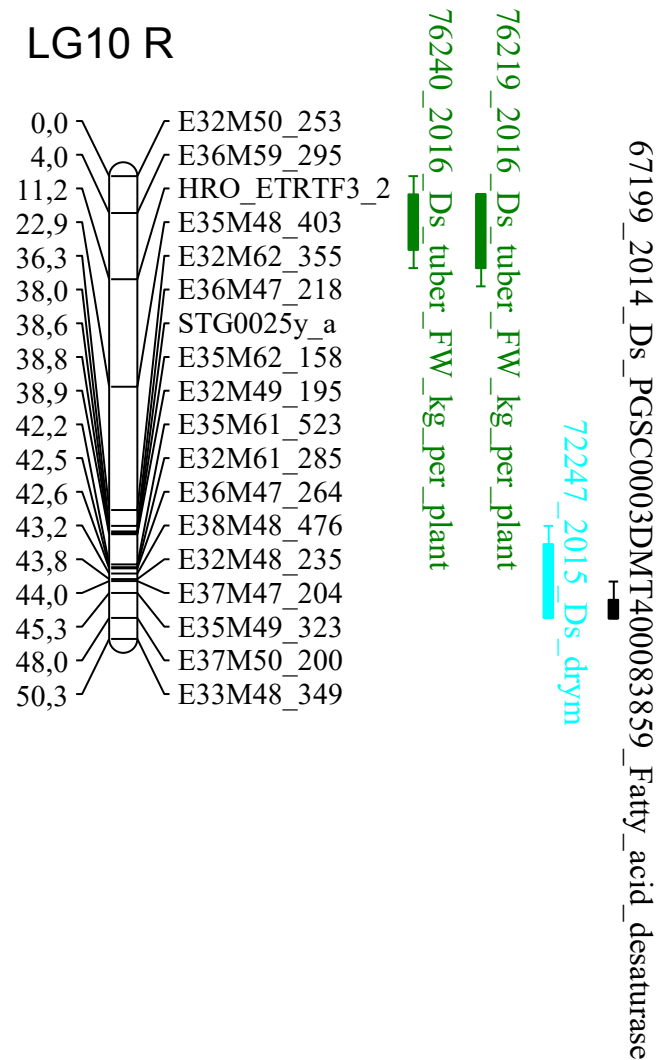

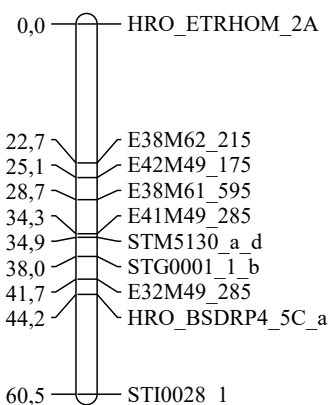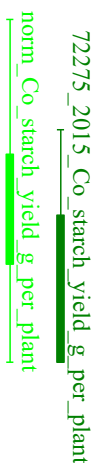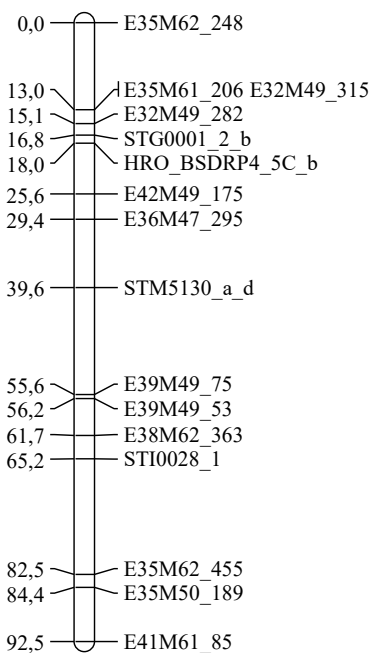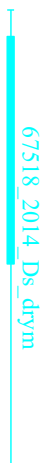



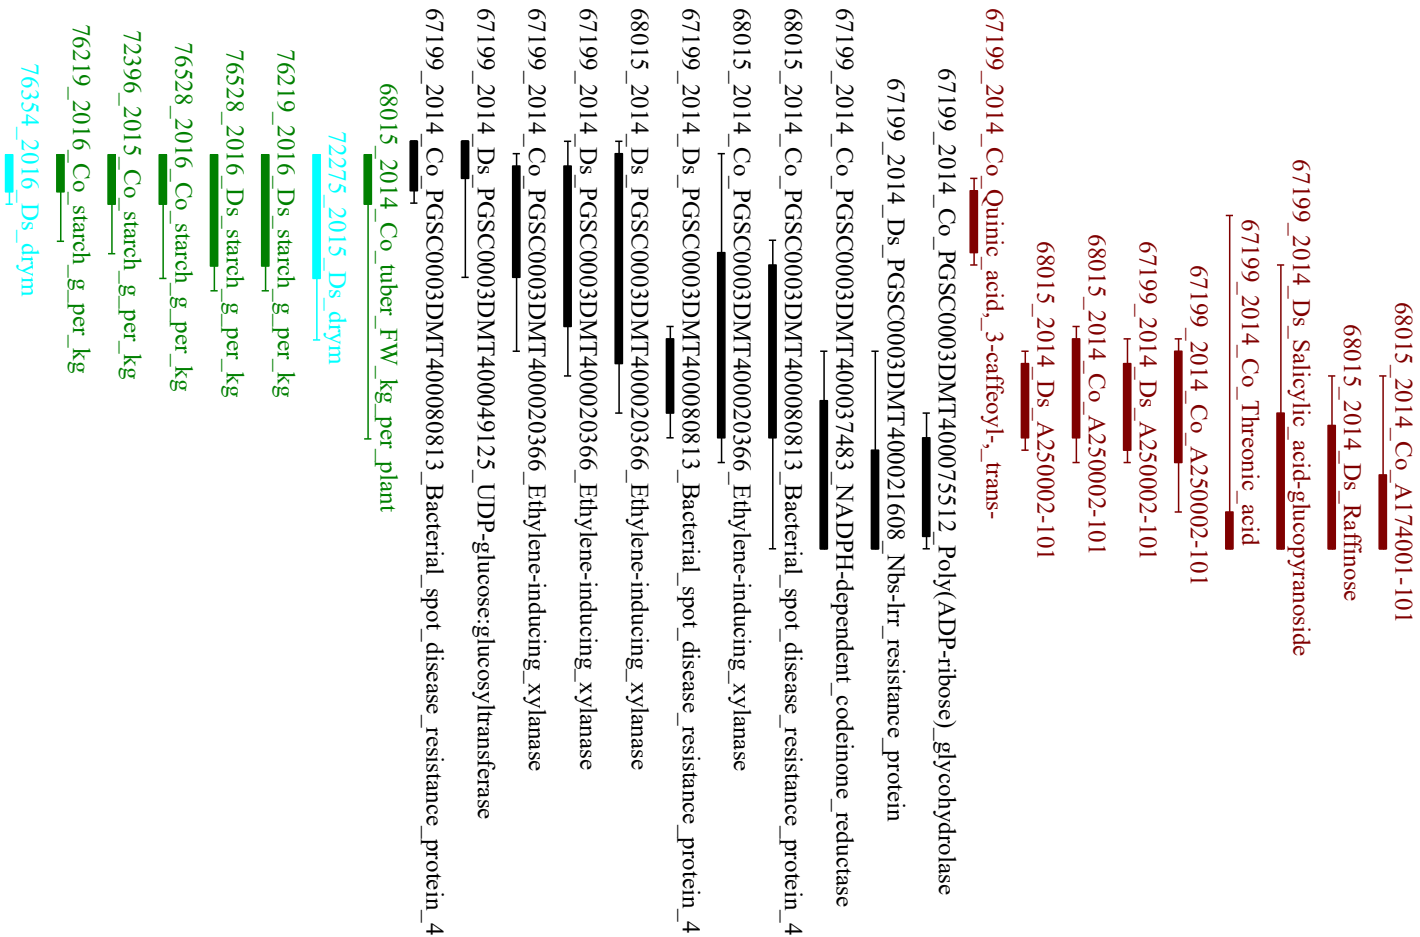

## LG12 A

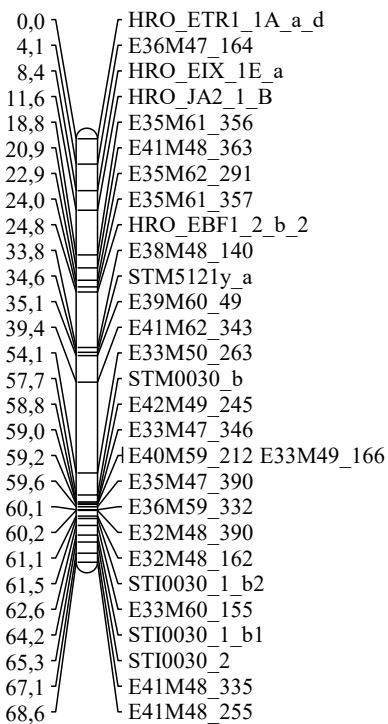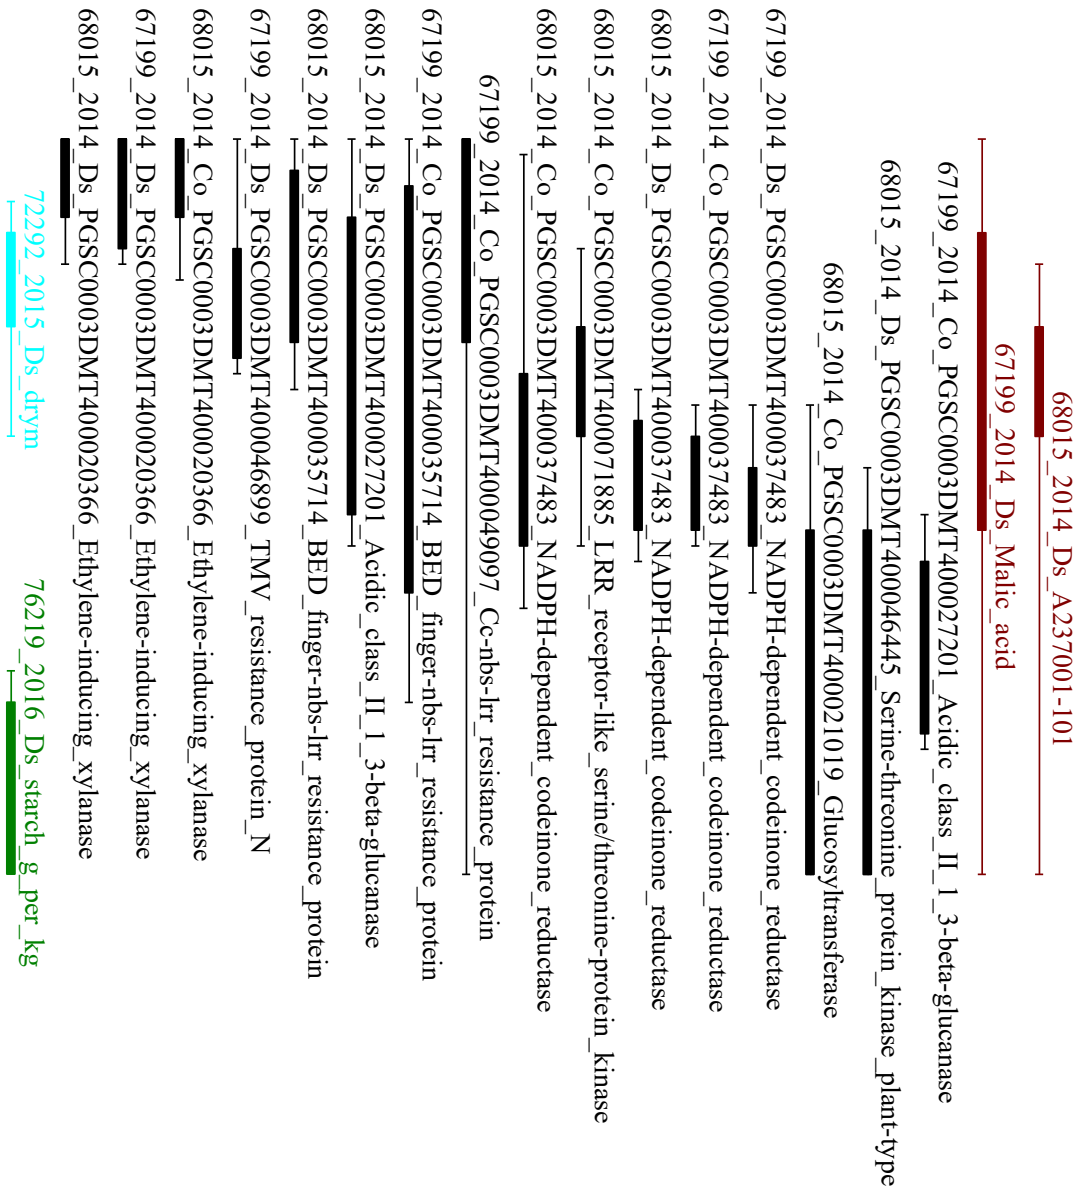

## LG12 R

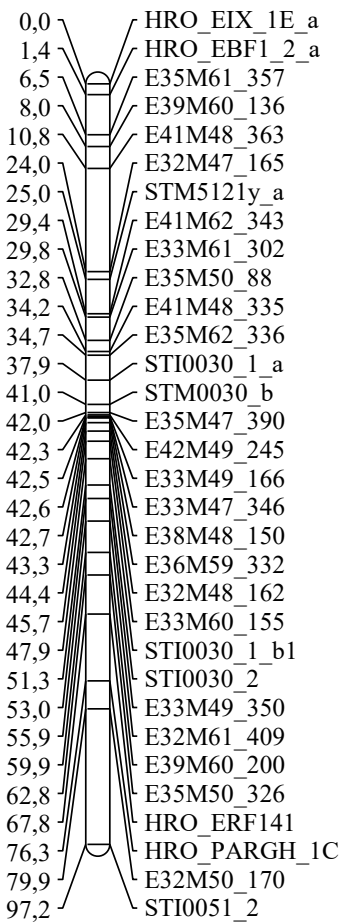



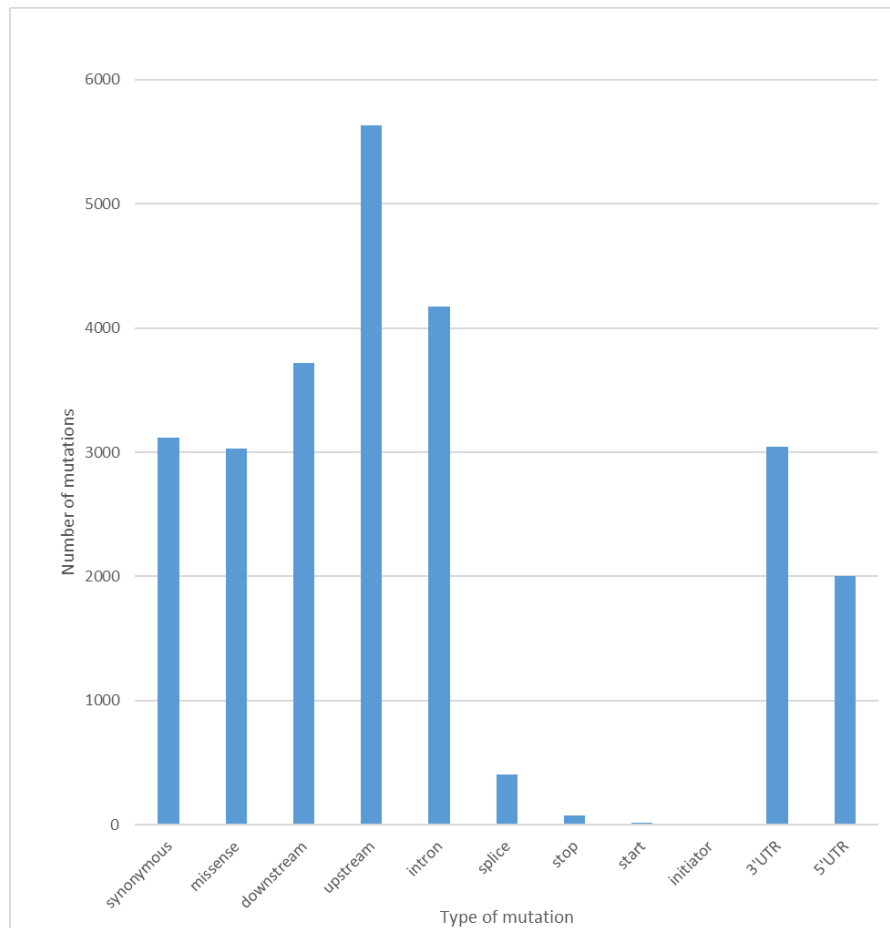

**Figure S7:** Overview over the different types of mutations occurring between the drought tolerant and drought sensitive bulk at the DRYM QTL on LG3.

Table S1: Linkage group specific SSR markers (reviewed in Ghislain *et al.* [33]).

| SSR Primer | Candidate gene Ensemble Plants                                     | Alternative name                                   | LG | EnsemblPlants        | Location (EnsemblPlants)  | Primary transcript   | Primer forward             | Primer reverse            |
|------------|--------------------------------------------------------------------|----------------------------------------------------|----|----------------------|---------------------------|----------------------|----------------------------|---------------------------|
| STG0001    | NtRab11D                                                           | Ras-related protein Rab11D-like                    | 11 | PGSC0003DMG400016224 | 11: 2,745,709-2,748,048   | PGSC0003DMT400041813 | CAgCCAAcATTtTgTACCCCT      | ACCCCCACtTgCCATATTTT      |
| STG0010    | Conserved gene of unknown function                                 |                                                    | 3  | PGSC0003DMG400022897 | 3: 61,403,444-61,405,401  | PGSC0003DMT400058939 | CgATCTCTgCTTTgCAGgTA       | gTTTCATCACTACCGcCgACT     |
| STG0012    | MAR-binding protein                                                | probable nucleolar protein 5-2                     | 9  | PGSC0003DMG400006104 | 9: 55,116,198-55,120,131  | PGSC0003DMT400015638 | ACACgCTgATgTtTgAggATg      | CTTAAAAACgCgCACCCAT       |
| STG0015    | RNA binding protein                                                | putative G3BP-like protein                         | 9  | PGSC0003DMG400027944 | 9: 31,218,417-31,224,429  | PGSC0003DMT400071822 | TgTAgCTgAAATCCgTggTg       | ggCgAggAAACTACAATgga      |
| STG0016    | Chromo domain protein LHP1                                         | Chromo domain protein LHP1                         | 1  | PGSC0003DMG400031112 | 1: 67,227,146-67,233,452  | PGSC0003DMT400079885 | AgCTgCTCAgCATCAAgAgA       | ACCACCTCaggCACTTCATC      |
| STG0018    | Glutamine-rich protein                                             | bromodomain-containing protein DDB_G0280777        | 3  | PGSC0003DMG400026490 | 3: 46,403,236-46,410,127  | PGSC0003DMT400068108 | ACCCgAATCCAAACCCCTAAC      | AACCCgTgTCAACTCTTgCT      |
| STG0020    | Sodium/potassium/calcium exchanger                                 | glutamic acid-rich protein-like                    | 4  | PGSC0003DMG400006339 | 4: 7,257,001-7,261,389    | PGSC0003DMT400016219 | gTCATCCgAAGATgAggAA        | CTggACTgTCTTCAACCACA      |
| STG0021    | Cornichon family protein                                           | protein cornichon homolog 4-like                   | 5  | PGSC0003DMG400007015 | 5: 45,581,656-45,587,896  | PGSC0003DMT400018058 | TgCCTACTgCCCAAACATTT       | ACTggCTgggAAgCATACAC      |
| STG0023    | Binding protein                                                    | uncharacterised                                    | 9  | PGSC0003DMG400031841 | 9: 53,064,362-53,065,293  | PGSC0003DMT400081442 | CTgCTAAATTTggACCCgAg       | gCAAgATTcGCATCATTTTT      |
| STG0025    | Oxidoreductase/ transition metal ion binding protein               |                                                    | 10 | PGSC0003DMG400028767 | 10: 33,537,359-33,540,698 | PGSC0003DMT400074007 | TggAATCCgAATTACgCTCT       | AggTTTTTCACTCgggCTT       |
| STGBS2     | Granule-bound starch synthase 1 (GBSS)                             | WAXY (SSG1_SOLTU)                                  | 8  | Q00775               | 8: 56,782,186-56,785,790  |                      | AATCggTgATAAATgTgAATgC     | ATgCTTgCCATgTgATgT        |
| STI0001    | Tuber-specific and sucrose-responsive element binding factor       | transcription factor MYB44-like                    | 4  | PGSC0003DMG400007994 | 4: 68,721,298-68,722,349  | PGSC0003DMT400020635 | CAgCAAAATCAgAACCCgAT       | ggATCATCAAAATTCACCgCT     |
| STI0003    | Methionine rich arabinogalactan                                    | arabinogalactan protein 9                          | 8  | PGSC0003DMG400026224 | 8: 51,167,796-51,168,630  | PGSC0003DMT400067461 | ACCATCCACCAATgTCAATgC      | CTTggAgATggTgTCAATTgg     |
| STI0004    | Nucleic acid binding protein                                       | protein indeterminate-domain 9-like                | 6  | PGSC0003DMG400003372 | 6: 55,860,945-55,863,589  | PGSC0003DMT400008694 | GCTgCTAAACACTCAgCagAA      | CAACTACAAGATTCATCCACAg    |
| STI0012    | cold-stress inducible protein (C17)                                |                                                    | 4  | U69633.1             |                           |                      | gAAGgAgCTTCCAAATCAgA       | AAAGggAggAATAgAAACCAAAA   |
| STI0014    | Auxin responsive protein                                           | auxin-responsive protein IAA14-like                | 9  | PGSC0003DMG400006093 | 9: 55,351,420-55,354,606  | PGSC0003DMT400015610 | AgAAACTgAgTTgTgTTTgggA     | TCAACAgTCTTCAGAAACCCCTCT  |
| STI0021    | Heat stress transcription factor A-6b                              | heat stress transcription factor A-6b-like         | 6  | PGSC0003DMG400016270 | 6: 40,218,132-40,220,250  | PGSC0003DMT400041944 | TCATCAAGTCGTGTCATCAAA      | TAGAAATGATCCAAAGCTTCC     |
| STI0024    | Hydroxyproline-rich glycoprotein family protein                    | nuclear pore complex protein NUP58                 | 2  | PGSC0003DMG400010074 | 2: 44,529,204-44,537,572  | PGSC0003DMT400026136 | CgCATTCTCTCAgATCAGCTC      | gCTgCagCAgTtTgTtTgT       |
| STI0025    | afadin- and alpha-actinin-binding protein-like                     |                                                    | 7  | XM_006361516.2       |                           |                      | CTgCCgCAAAAAGTgAAAAAC      | TgAAATgTAaggCAAAATTTTgAA  |
| STI0028    | Conserved gene of unknown function                                 |                                                    | 11 | PGSC0003DMG400007365 | 11: 37,968,820-37,970,009 | PGSC0003DMT400019013 | ATACCCCTCCAAATggTCCCTT     | CTTggAgATtTgCAAgAAgAA     |
| STI0030    | Conserved gene of unknown function                                 | probable beta-1,4-xylosyltransferase I RX10L       | 12 | PGSC0003DMG400014472 | 12: 49,058,583-49,067,549 | PGSC0003DMT400037513 | TTgACCCCTCCAACTATAgATTCCTC | TgACAACTTTAAAgCATATgTCAGC |
| STI0032    | Membrane associated ring finger 1.8                                | uncharacterized protein LOC102582422               | 5  | PGSC0003DMG400018414 | 5: 4,786,918-4,792,370    | PGSC0003DMT400047386 | TgggAAgAATCCTgTAAATg       | TgCTCTACCAATTAACgCgCA     |
| STI0033    | Heat stress transcription factor HSF9                              | heat shock factor protein HSF30-like               | 7  | PGSC0003DMG400032793 | 7: 36,269,190-36,271,391  | PGSC0003DMT400082752 | TgAgggTTTTTCAGAAAgggA      | CATCCTTgCAACAACTCCCT      |
| STI0034    | Fasciclin-like arabinogalactan protein 14                          | fasciclin-like arabinogalactan protein 17          | 1  | PGSC0003DMG400021372 |                           | PGSC0003DMT400055078 | CAAgAAACCAAgAgCAAAATTTCA   | TggCgAAATgTgAgAAACAAA     |
| STI0036    | Transcriptional regulator family protein                           | uncharacterised protein                            | 2  | PGSC0003DMG400028477 | 2: 31,847,395-31,855,085  |                      | ggACTggCTgACCAATgAACT      | TTACAggAATgCAAACTTCg      |
| STI0043    | Zinc finger protein                                                | protein indeterminate-domain 5, chloroplastic-like | 1  | PGSC0003DMG400016379 | 1: 3,502,584-3,504,030    | PGSC0003DMT400042209 | CAATgCgAATgTtTgCTACTgT     | ATCCACCAAgACCTCCAgAA      |
| STI0051    | Dead box ATP-dependent RNA helicase                                |                                                    | 12 | PGSC0003DMG400004585 | 12: 59,520,252-59,526,095 | PGSC0003DMT400011665 | ggTCTCCATTAgCCCTCTgAg      | ACATAAATggATCACACA        |
| STI0056    | Acyl-CoA thioesterase                                              | 1,4-dihydroxy-2-naphthoyl-CoA thioesterase 1       | 2  | PGSC0003DMG400022385 | 2: 34,101,866-34,103,039  | PGSC0003DMT400057647 | gACAgAgAATAgTgggACCACCA    | gCAGCACCTTAAATggCTgAC     |
| STM0030    | not annotated                                                      |                                                    | 12 | -                    | 12: 22,813,884-22,813,902 |                      | AgAgATCgATgTAAACACgT       | gTggCATTTTgATggATT        |
| STM0031    | not annotated                                                      |                                                    | 7  | -                    | 7: 17,864,488-17,864,661  |                      | CATAcCgCAcCgTACAC          | TTCAACCTATCATTTTgTgAgTcG  |
| STM1004    | 1-Aminocyclopropane-1-carboxylate synthase (ACS2)                  | 1-aminocyclopropane-1-carboxylate synthase 4-like  | 7  | PGSC0003DMG400017039 | 7: 25,011,892-25,013,488  | PGSC0003DMT400043903 | ATATgAAATTCCTCTCgATgTTTCg  | TCAGCCATAAAXCTTTgATTACCT  |
| STM1021    | proteinase inhibitor 1-like (PI3), serine protease inhibitor (PIN) |                                                    | 9  | XM_006367721.2       |                           |                      | ggAgTCAAAgTTTgCTCACATC     | CACCCTCAACCCCATATC        |
| STM1031    | Actin-58                                                           |                                                    | 5  | PGSC0003DMG400023429 | 5: 50,245,290-50,248,122  | PGSC0003DMT400060225 | TgTgTTTTgTTTTCTgTAT        | AATTCTATCCTCATCTCTA       |
| STM1058    | not annotated                                                      |                                                    | 3  | -                    | 3: 49,869,169-49,869,195  |                      | ACAAATTTAATCAAgAAgCTAgg    | CCAAATTTgTATACCTCAATAgA   |
| STM104     | granule-bound starch synthase (GBSS) (WAXY)                        |                                                    | 8  | PGSC0003DMG400012111 | 8: 56,782,186-56,785,790  |                      | TgATTCTCTTgCCTACTgTAATCg   | CAAAgTggTgTgAAgCTgTgA     |
| STM3012    | not annotated                                                      |                                                    | 9  | -                    | 9: 3,964,718-3,964,881    |                      | CAACTCAAAACCAgAaggCAAA     | gAgAAATgggCACAACCAACA     |
| STM5114    | Disease resistance response protein                                |                                                    | 2  | PGSC0003DMG403001521 | 2: 38,554,309-38,555,180  | PGSC0003DMT400003860 | AATggCTCTCTCTgTATgCT       | gCTgTCCCAACTATCTTgA       |
| STM5115    | Glycerol kinase                                                    |                                                    | 3  | PGSC0003DMG400014144 | 3: 57,209,534-57,212,556  |                      | TCTCCCTCTCTATCTCTCT        | TCAACCTggTgAgATCCAAACA    |
| STM5117    | U2 snmp auxiliary factor, small subunit                            | splicing factor U2af small subunit B-like          | 10 | PGSC0003DMG400028265 | 10: 55,512,395-55,515,132 |                      | TCCACATTAgAAAACCCCTC       | AggACgCTggTACATgTTAgA     |
| STM5121    | Conserved gene of unknown function                                 |                                                    | 12 | PGSC0003DMG400000292 | 12: 4,002,106-4,002,649   |                      | CACCcgAATAAgCggATCT        | TCTTCCCTTCCAATTTgTCA      |
| STM5126    | uncharacterised                                                    |                                                    | 6  | XP_006354728.1       |                           |                      | gCAACAgCgCATCAACAAA        | TCCAAATCCATCCCATgAg       |
| STM5130    | U11/U12 small nuclear ribonucleoprotein                            |                                                    | 11 | PGSC0003DMG400031069 | 11: 3,780,507-3,783,394   |                      | AAAgTACAgCgAAgATgAcgAC     | TTACCTTTgCAACCTTgCC       |
| STM5149    | not annotated                                                      |                                                    | 5  | -                    | 5: 51,904,687-51,904,711  |                      | CTCCCAAACTAACCCATATTAC     | gCgACTCTATTATCACTTgAC     |

Table S2: SSR markers derived from candidate genes for drought tolerance by Schumacher *et al.* [34] and mapped in A×R.

| Candidate gene                                      | Abbr.        | SSR primer     | LG | Gene ID EnsemblPlants | Location (EnsemblPlants)  | Primary transcript    |
|-----------------------------------------------------|--------------|----------------|----|-----------------------|---------------------------|-----------------------|
| ABA8'-hydroxylase CYP707A2                          | ABA8H        | HRO_ABA8H4_2   | 4  | PGSC0003DMG400007972  | 4: 68,244,330-68,248,224  | PGSC0003 DMT400020589 |
| 1-aminocyclopropane 1-carboxylate oxidase           | ACO          | HRO_ACCO_1     | 2  | PGSC0003DMG400021476  | 2: 17,740,757-17,743,016  | PGSC0003 DMT400055332 |
| 1-aminocyclopropane 1-carboxylate oxidase           | ACO          | HRO_ACCO_4     | 9  | PGSC0003DMG400009719  | 9: 49,787,843-49,791,601  | PGSC0003 DMT400025148 |
| 1-aminocyclopropane-1-carboxylate synthase 2        | ACS2         | HRO_ACCS2_1    | 1  | PGSC0003DMG400000193  | 1: 72,662,888-72,665,831  | PGSC0003 DMT400000553 |
| 1-aminocyclopropane 1-carboxylate synthase 3        | ACS3         | HRO_ACCS3_1    | 2  | PGSC0003DMG400021426  | 2: 42,416,137-42,418,380  | PGSC0003 DMT400055203 |
| 1-aminocyclopropane 1-carboxylate synthase 4        | ACS4         | HRO_ACCS4_1    | 5  | PGSC0003DMG400021651  | 5: 44,070,623-44,073,744  | PGSC0003 DMT400055753 |
| Aldehyde dehydrogenase family 7 member              | ALDH         | HRO_ALDH_H     | 4  | PGSC0003DMG400034597  | 9: 22,591,541-22,597,210  | PGSC0003 DMT400085026 |
| Beta-amylase                                        | BA           | HRO_BA_1       | 1  | PGSC0003DMG400000169  | 1: 72,104,919-72,114,159  | PGSC0003 DMT400000485 |
| Betaine aldehyde dehydrogenase                      | BADH         | HRO_BADH_2     | 6  | PGSC0003DMG400033028  | 6: 52,130,166-52,135,413  | PGSC0003 DMT400083025 |
| Beta-D-glucan exohydrolase                          | BDGEH        | HRO_BDGEH_1B   | 6  | PGSC0003DMG402005942  | 6: 54,345,177-54,347,242  | PGSC0003 DMT400015224 |
| Bacterial spot disease resistance protein 4 (BS4)   | BS4          | HRO_BSDRP4_5C  | 11 | PGSC0003DMG400033334  | 11: 37,644,263-37,650,835 | PGSC0003 DMT400006231 |
| Delta 1-pyrroline-5-carboxylate synthetase          | P5CS         | HRO_D1P5CS_1   | 6  | PGSC0003DMG402026767  | 6: 15,776,837-15,786,259  | PGSC0003 DMT400083471 |
| EIN3-binding F-box protein 1                        | EBF1         | HRO_EBF1_2     | 12 | PGSC0003DMG400002914  | 12: 2,844,416-2,848,113   | PGSC0003 DMT400007545 |
| Ethylene insensitive-like 2                         | EIL2         | HRO_EIL2_1     | 1  | PGSC0003DMG400008712  | 1: 6,142,379-6,146,461    | PGSC0003 DMT400022477 |
| Ethylene-inducing xylanase                          | EIX          | HRO_EIX_1E     | 12 | PGSC0003DMG400007876  | 12: 1,808,690-1,811,450   | PGSC0003 DMT400020367 |
| Ethylene responsive element binding protein 1       | EREBP1       | HRO_EREBP1_1   | 2  | PGSC0003DMG400029713  | 2: 33,632,854-33,633,640  | PGSC0003 DMT400076408 |
| Ethylene responsive element binding protein C2      | EREBPC2      | HRO_EREBPC2_1  | 5  | PGSC0003DMG400016003  | 5: 47,308,711-47,310,174  | PGSC0003 DMT400041327 |
| Ethylene response factor 114                        | ERF114/ERF80 | HRO_ERF114_1   | 3  | PGSC0003DMG400014240  | 3: 57,768,986-57,771,196  | PGSC0003 DMT400036934 |
| Ethylene response factor 141                        | ERF141       | HRO_ERF141     | 12 | PGSC0003DMG400028853  | 12: 53,036,109-53,038,939 | PGSC0003 DMT400074248 |
| Ethylene overproduction protein 1                   | ETO1         | HRO_ETOP1_3    | 10 | PGSC0003DMG400015898  | 10: 49,687,923-49,692,818 | PGSC0003 DMT400041081 |
| Ethylene receptor 1                                 | ETR1         | HRO_ETR1_1A    | 12 | PGSC0003DMG400007843  | 12: 1,111,718-1,121,848   | PGSC0003 DMT400020285 |
| Ethylene receptor homolog                           | ETR homolog  | HRO_ETRHOM_2A  | 11 | PGSC0003DMG400028694  | 11: 6,479,282-6,486,765   | PGSC0003 DMT400073847 |
| Ethylene responsive transcription factor 3          | ETR3         | HRO_ETR3_2     | 10 | PGSC0003DMG400014417  | 10: 1,121,218-1,122,800   | PGSC0003 DMT400037359 |
| Glucosyltransferase                                 | GT           | HRO_GLUCT_7C   | 10 | PGSC0003DMG400008138  | 10: 58,444,348-58,445,769 | PGSC0003 DMT400021019 |
| Jasmonic acid 2                                     | JA2          | HRO_JA2_1      | 12 | PGSC0003DMG400015342  | 12: 822,922-825,609       | PGSC0003 DMT400039670 |
| Late embryogenesis abundant protein 5               | LEA5         | HRO_LEA5_1     | 6  | PGSC0003DMG400017936  | 6: 461,908-463,086        | PGSC0003 DMT400046207 |
| Lipoxygenase                                        | LOX          | HRO_LIPOX_1B   | 1  | PGSC0003DMG400032207  | 1: 2,151,329-2,152,141    | PGSC0003 DMT400082023 |
| LRR receptor-like serine/threonine-protein kinase   | LRR-STPK     | HRO_LRRSTPK_1C | 4  | PGSC0003DMG400027968  | 4: 63,318,594-63,322,913  | PGSC0003 DMT400071885 |
| Multidrug resistance protein ABC transporter family | MRP          | HRO_MRPFATF_3D | 8  | PGSC0003DMG400012167  | 8: 55,531,912-55,539,184  | PGSC0003 DMT400031714 |
| Nucleoside diphosphate kinase 2                     | NDPK         | HRO_NDPK2_1    | 6  | PGSC0003DMG400026976  | 6: 52,807,449-52,811,263  | PGSC0003 DMT400069352 |
| Poly (ADP-ribose) glycohydrolase                    | PARG         | HRO_PARGH_1C   | 12 | PGSC0003DMG400029361  | 12: 58,212,212-58,218,855 | PGSC0003 DMT400075512 |
| Proline oxidase/ dehydrogenase 1                    | PRODH/PDH    | HRO_POD1_2     | 2  | PGSC0003DMG400010050  | 2: 45,033,737-45,039,948  | PGSC0003 DMT400026049 |
| S-locus-specific glycoprotein S6                    | SLSG6        | HRO_SLSGPS6_5C | 2  | PGSC0003DMG401013876  | 2: 35,398,866-35,403,067  | PGSC0003 DMT400036023 |
| Vacuolar protein sorting protein                    | VPS          | HRO_VPSP_1B    | 8  | PGSC0003DMG400003501  | 00: 36,520,614-36,528,235 | PGSC0003 DMT400008980 |

**Table S3:** Genes located under the standalone DRYM QTL on LG3 flanked by the SSR markers STG0018\_b (glutamine-rich protein, PGSC0003DMG400026490) and STM5115\_D/E (glycerol kinase, PGSC0003DMG400014144)

| Chromosome | Region             | ID                   | name                                                                           |
|------------|--------------------|----------------------|--------------------------------------------------------------------------------|
| ST4.03ch03 | 47424062..47430953 | PGSC0003DMG400026490 | Glutamine-rich protein                                                         |
| ST4.03ch03 | 47437840..47440384 | PGSC0003DMG400026476 | Transporter                                                                    |
| ST4.03ch03 | 47449204..47458885 | PGSC0003DMG400026491 | Sigma factor                                                                   |
| ST4.03ch03 | 47460195..47461543 | PGSC0003DMG400026477 | Transparent testa glabra 1                                                     |
| ST4.03ch03 | 47463695..47467667 | PGSC0003DMG400026492 | Protein kinase family protein                                                  |
| ST4.03ch03 | 47467748..47468285 | PGSC0003DMG400026498 | Gene of unknown function                                                       |
| ST4.03ch03 | 47487516..47493633 | PGSC0003DMG400026478 | Transcription regulator                                                        |
| ST4.03ch03 | 47494514..47503012 | PGSC0003DMG400026493 | DNA-binding protein smubp-2                                                    |
| ST4.03ch03 | 47519505..47521516 | PGSC0003DMG400026479 | Metal ion binding protein                                                      |
| ST4.03ch03 | 47531214..47533611 | PGSC0003DMG400026494 | Palmitoyl-acyl carrier protein thioesterase                                    |
| ST4.03ch03 | 47547518..47548053 | PGSC0003DMG400026499 | Gene of unknown function                                                       |
| ST4.03ch03 | 47553314..47554113 | PGSC0003DMG400026480 | Mitotic-spindle organizing protein 1B                                          |
| ST4.03ch03 | 47563557..47564906 | PGSC0003DMG400026481 | Inositol polyphosphate kinase                                                  |
| ST4.03ch03 | 47578499..47579122 | PGSC0003DMG400026482 | Protein HVA22                                                                  |
| ST4.03ch03 | 47585757..47589106 | PGSC0003DMG400026483 | HVA22 e                                                                        |
| ST4.03ch03 | 47594326..47595170 | PGSC0003DMG400026484 | Gene of unknown function                                                       |
| ST4.03ch03 | 47596864..47599863 | PGSC0003DMG400026485 | Steroleosin                                                                    |
| ST4.03ch03 | 47600579..47602276 | PGSC0003DMG400042259 | Steroleosin                                                                    |
| ST4.03ch03 | 47604195..47610674 | PGSC0003DMG400026495 | Gene of unknown function                                                       |
| ST4.03ch03 | 47632362..47632668 | PGSC0003DMG400031743 | Conserved gene of unknown function                                             |
| ST4.03ch03 | 47650991..47659469 | PGSC0003DMG400031735 | Conserved gene of unknown function                                             |
| ST4.03ch03 | 47695147..47700963 | PGSC0003DMG400031730 | Protein DEK                                                                    |
| ST4.03ch03 | 47704728..47706692 | PGSC0003DMG400031731 | Feruloyl transferase                                                           |
| ST4.03ch03 | 47711499..47712968 | PGSC0003DMG400031744 | SAUR family protein                                                            |
| ST4.03ch03 | 47744480..47747638 | PGSC0003DMG400031732 | ATP binding                                                                    |
| ST4.03ch03 | 47749812..47751781 | PGSC0003DMG400031737 | Conserved gene of unknown function                                             |
| ST4.03ch03 | 47761057..47771749 | PGSC0003DMG400031733 | Ribosomal pseudouridine synthase                                               |
| ST4.03ch03 | 47781309..47783293 | PGSC0003DMG400031738 | UPA16                                                                          |
| ST4.03ch03 | 47825166..47826980 | PGSC0003DMG401031741 | UPA16                                                                          |
| ST4.03ch03 | 47838609..47840449 | PGSC0003DMG402031741 | UPA16                                                                          |
| ST4.03ch03 | 47860239..47862426 | PGSC0003DMG400031742 | UPA16                                                                          |
| ST4.03ch03 | 47867400..47868097 | PGSC0003DMG400031746 | Gene of unknown function                                                       |
| ST4.03ch03 | 47958591..47959970 | PGSC0003DMG400004335 | MTN3 homolog                                                                   |
| ST4.03ch03 | 47987093..47988146 | PGSC0003DMG400004345 | Gene of unknown function                                                       |
| ST4.03ch03 | 47989956..47990672 | PGSC0003DMG400004330 | Ulp1 protease family, C-terminal catalytic domain containing protein           |
| ST4.03ch03 | 47994923..47996770 | PGSC0003DMG400004337 | MTN3                                                                           |
| ST4.03ch03 | 48011707..48012164 | PGSC0003DMG402004331 | Conserved gene of unknown function                                             |
| ST4.03ch03 | 48011922..48016603 | PGSC0003DMG401004331 | Zinc finger protein                                                            |
| ST4.03ch03 | 48017044..48019156 | PGSC0003DMG400004338 | Mitochondrial import inner membrane translocase subunit Tim8/small zinc finger |
| ST4.03ch03 | 48030127..48031759 | PGSC0003DMG400004332 | NAC domain protein                                                             |
| ST4.03ch03 | 48035601..48037948 | PGSC0003DMG400004333 | Conserved gene of unknown function                                             |

|            |                    |                      |                                                  |
|------------|--------------------|----------------------|--------------------------------------------------|
| ST4.03ch03 | 48081373..48088382 | PGSC0003DMG401004334 | Pyruvate dehydrogenase                           |
| ST4.03ch03 | 48084220..48087524 | PGSC0003DMG402004334 | Pyruvate dehydrogenase E1 component subunit beta |
| ST4.03ch03 | 48087606..48088378 | PGSC0003DMG403004334 | Gene of unknown function                         |
| ST4.03ch03 | 48090273..48096387 | PGSC0003DMG400004340 | DNA binding protein                              |
| ST4.03ch03 | 48125374..48128012 | PGSC0003DMG400004342 | O-methyltransferase                              |
| ST4.03ch03 | 48129666..48130040 | PGSC0003DMG400004343 | Flavonoid 8-O-methyltransferase                  |
| ST4.03ch03 | 48231939..48233260 | PGSC0003DMG400012024 | O-methyltransferase                              |
| ST4.03ch03 | 48240576..48242568 | PGSC0003DMG400045265 | Gene of unknown function                         |
| ST4.03ch03 | 48248422..48249570 | PGSC0003DMG400012023 | O-methyltransferase                              |
| ST4.03ch03 | 48273251..48280627 | PGSC0003DMG400012026 | Conserved gene of unknown function               |
| ST4.03ch03 | 48288363..48291063 | PGSC0003DMG400012025 | UPF0497 membrane protein 8                       |
| ST4.03ch03 | 48293775..48294625 | PGSC0003DMG400012022 | MdSFBB3-alpha protein                            |
| ST4.03ch03 | 48308180..48310280 | PGSC0003DMG400012021 | Armadillo/beta-catenin repeat family protein     |
| ST4.03ch03 | 48325359..48325795 | PGSC0003DMG400019863 | RNase H family protein                           |
| ST4.03ch03 | 48335188..48338656 | PGSC0003DMG400019852 | Translocon-associated protein, beta subunit      |
| ST4.03ch03 | 48339685..48342920 | PGSC0003DMG400019853 | Sterile alpha motif domain-containing protein    |
| ST4.03ch03 | 48343038..48343841 | PGSC0003DMG401019860 | Alpha-2, 8-sialyltransferase 8b                  |
| ST4.03ch03 | 48343038..48349287 | PGSC0003DMG402019860 | Glycosyl transferase family 29 protein           |
| ST4.03ch03 | 48382584..48385594 | PGSC0003DMG400019861 | BHLH transcription factor Upa20                  |
| ST4.03ch03 | 48396332..48396781 | PGSC0003DMG400019855 | Uncharacterized mitochondrial protein            |
| ST4.03ch03 | 48398752..48407280 | PGSC0003DMG400019856 | Poly(A) polymerase                               |
| ST4.03ch03 | 48443252..48446715 | PGSC0003DMG400019858 | Pentatricopeptide repeat-containing protein      |
| ST4.03ch03 | 48449743..48452807 | PGSC0003DMG400019859 | Nuclear transcription factor, X-box binding      |
| ST4.03ch03 | 48458585..48461113 | PGSC0003DMG400033693 | UPA16                                            |
| ST4.03ch03 | 48462312..48464791 | PGSC0003DMG400033684 | Cyc07                                            |
| ST4.03ch03 | 48467210..48471492 | PGSC0003DMG400033683 | Dehydrogenase                                    |
| ST4.03ch03 | 48482204..48483578 | PGSC0003DMG400033696 | MAPKK                                            |
| ST4.03ch03 | 48492783..48495099 | PGSC0003DMG400033682 | Potassium channel SKOR                           |
| ST4.03ch03 | 48525070..48525564 | PGSC0003DMG400033692 | Stelar K+ outward rectifying channel             |
| ST4.03ch03 | 48526013..48530094 | PGSC0003DMG400033691 | 50S ribosomal protein L29, chloroplastic         |
| ST4.03ch03 | 48530148..48532446 | PGSC0003DMG400033695 | DC1 domain containing protein                    |
| ST4.03ch03 | 48533468..48536913 | PGSC0003DMG400033690 | Conserved gene of unknown function               |
| ST4.03ch03 | 48537414..48543917 | PGSC0003DMG400033681 | GTP-binding protein alpha subunit, gna           |
| ST4.03ch03 | 48544949..48550522 | PGSC0003DMG400033680 | Protein SSU72                                    |
| ST4.03ch03 | 48554650..48558518 | PGSC0003DMG400033689 | Conserved gene of unknown function               |
| ST4.03ch03 | 48558976..48561647 | PGSC0003DMG400033688 | Tartrate-resistant acid phosphatase type 5       |
| ST4.03ch03 | 48565204..48572401 | PGSC0003DMG400033687 | Hydrolase, alpha/beta fold family protein        |
| ST4.03ch03 | 48598932..48602581 | PGSC0003DMG400033685 | Calmodulin                                       |
| ST4.03ch03 | 48607958..48608787 | PGSC0003DMG400033694 | Zinc finger homeodomain protein SZF-HD1          |
| ST4.03ch03 | 48688066..48691049 | PGSC0003DMG400031049 | Nucleic acid binding protein                     |
| ST4.03ch03 | 48718437..48719844 | PGSC0003DMG400037321 | UPF0497 membrane protein                         |
| ST4.03ch03 | 48724509..48725606 | PGSC0003DMG400031035 | Conserved gene of unknown function               |
| ST4.03ch03 | 48726874..48730768 | PGSC0003DMG401031036 | Chalcone reductase                               |
| ST4.03ch03 | 48728065..48729471 | PGSC0003DMG402031036 | Aldo-keto reductase                              |



|            |                    |                      |                                                                               |
|------------|--------------------|----------------------|-------------------------------------------------------------------------------|
| ST4.03ch03 | 48729228..48737666 | PGSC0003DMG400031050 | Conserved gene of unknown function                                            |
| ST4.03ch03 | 48733753..48734143 | PGSC0003DMG400031060 | Gene of unknown function                                                      |
| ST4.03ch03 | 48738340..48742254 | PGSC0003DMG400031051 | Conserved gene of unknown function                                            |
| ST4.03ch03 | 48745281..48746801 | PGSC0003DMG401031052 | Conserved gene of unknown function                                            |
| ST4.03ch03 | 48747013..48751559 | PGSC0003DMG402031052 | Polysialic acid capsule expression protein kpsF                               |
| ST4.03ch03 | 48761799..48765775 | PGSC0003DMG401031037 | ATP binding protein                                                           |
| ST4.03ch03 | 48767478..48771567 | PGSC0003DMG402031037 | Kinase family protein                                                         |
| ST4.03ch03 | 48785885..48793264 | PGSC0003DMG400031053 | Tubulin-specific chaperone B                                                  |
| ST4.03ch03 | 48796402..48804322 | PGSC0003DMG400031039 | Conserved gene of unknown function                                            |
| ST4.03ch03 | 48805756..48810618 | PGSC0003DMG400031054 | Transcription factor                                                          |
| ST4.03ch03 | 48812918..48813880 | PGSC0003DMG400031040 | Glycosyl hydrolases family 17 protein                                         |
| ST4.03ch03 | 48851581..48856943 | PGSC0003DMG400031057 | Serine palmitoyltransferase                                                   |
| ST4.03ch03 | 48894786..48895620 | PGSC0003DMG400037684 | Double-stranded RNA binding protein                                           |
| ST4.03ch03 | 48900767..48907402 | PGSC0003DMG400031041 | D-cysteine desulfhydrase                                                      |
| ST4.03ch03 | 48908751..48912422 | PGSC0003DMG400031042 | Glutamate decarboxylase isoform1                                              |
| ST4.03ch03 | 48913347..48918844 | PGSC0003DMG400031043 | DNA polymerase epsilon subunit B                                              |
| ST4.03ch03 | 48925944..48929097 | PGSC0003DMG400031044 | MYB transcription factor                                                      |
| ST4.03ch03 | 48938395..48945842 | PGSC0003DMG401031045 | AGO1-1                                                                        |
| ST4.03ch03 | 48940900..48941627 | PGSC0003DMG402031045 | Argonaute 1                                                                   |
| ST4.03ch03 | 48948994..48950010 | PGSC0003DMG400031046 | Sucrose synthase                                                              |
| ST4.03ch03 | 48969450..48973461 | PGSC0003DMG400031047 | Ornithine decarboxylase                                                       |
| ST4.03ch03 | 48982747..48987087 | PGSC0003DMG400031059 | Conserved gene of unknown function                                            |
| ST4.03ch03 | 49030586..49031219 | PGSC0003DMG400028082 | Gene of unknown function                                                      |
| ST4.03ch03 | 49068083..49068790 | PGSC0003DMG400024452 | Pyridoxal-dependent decarboxylase, C-terminal sheet domain containing protein |
| ST4.03ch03 | 49135756..49136999 | PGSC0003DMG400025628 | Pyridoxal-dependent decarboxylase, C-terminal sheet domain containing protein |
| ST4.03ch03 | 49139317..49143992 | PGSC0003DMG400025632 | Myb-like DNA-binding protein                                                  |
| ST4.03ch03 | 49152065..49158071 | PGSC0003DMG400025629 | Conserved gene of unknown function                                            |
| ST4.03ch03 | 49159146..49163130 | PGSC0003DMG400025630 | Conserved gene of unknown function                                            |
| ST4.03ch03 | 49164765..49165850 | PGSC0003DMG400025633 | F-box protein interaction domain containing protein                           |
| ST4.03ch03 | 49166847..49168407 | PGSC0003DMG400025634 | F-box protein interaction domain containing protein                           |
| ST4.03ch03 | 49169514..49169897 | PGSC0003DMG400025636 | Receptor kinase                                                               |
| ST4.03ch03 | 49185119..49186624 | PGSC0003DMG400025631 | F-box protein interaction domain containing protein                           |
| ST4.03ch03 | 49188663..49191683 | PGSC0003DMG400025635 | Leucine rich repeat containing protein                                        |
| ST4.03ch03 | 49213733..49215517 | PGSC0003DMG400010183 | Receptor kinase                                                               |
| ST4.03ch03 | 49217068..49217644 | PGSC0003DMG401010182 | Receptor kinase                                                               |
| ST4.03ch03 | 49217733..49218479 | PGSC0003DMG400010159 | Conserved gene of unknown function                                            |
| ST4.03ch03 | 49219417..49222365 | PGSC0003DMG401010181 | Pentatricopeptide repeat domain containing protein                            |
| ST4.03ch03 | 49222889..49226202 | PGSC0003DMG402010181 | Xyloglucan endotransglucosylase/hydrolase protein 9                           |
| ST4.03ch03 | 49226872..49231147 | PGSC0003DMG400010180 | TPR domain containing protein                                                 |
| ST4.03ch03 | 49230741..49235734 | PGSC0003DMG400010158 | Kinase interacting protein                                                    |
| ST4.03ch03 | 49236384..49246086 | PGSC0003DMG400010157 | Forever young oxidoreductase                                                  |
| ST4.03ch03 | 49247565..49251425 | PGSC0003DMG400010156 | Small nuclear ribonucleoprotein polypeptide                                   |
| ST4.03ch03 | 49252642..49254408 | PGSC0003DMG400010155 | Gene of unknown function                                                      |
| ST4.03ch03 | 49268925..49270398 | PGSC0003DMG400010154 | Conserved gene of unknown function                                            |

|            |                    |                      |                                                    |
|------------|--------------------|----------------------|----------------------------------------------------|
| ST4.03ch03 | 49280471..49283620 | PGSC0003DMG400010153 | ARF-GAP domain 15                                  |
| ST4.03ch03 | 49297425..49302439 | PGSC0003DMG400010179 | Gene of unknown function                           |
| ST4.03ch03 | 49303047..49304192 | PGSC0003DMG400010178 | F-box family protein                               |
| ST4.03ch03 | 49304609..49306399 | PGSC0003DMG400010177 | Pentatricopeptide                                  |
| ST4.03ch03 | 49307894..49311517 | PGSC0003DMG400010176 | Zinc finger protein                                |
| ST4.03ch03 | 49312334..49318212 | PGSC0003DMG400010152 | Integral membrane protein                          |
| ST4.03ch03 | 49320205..49329385 | PGSC0003DMG400010151 | ARC6H                                              |
| ST4.03ch03 | 49339491..49346448 | PGSC0003DMG400010175 | DNA-binding protein RHL1                           |
| ST4.03ch03 | 49346924..49353854 | PGSC0003DMG400010150 | Conserved gene of unknown function                 |
| ST4.03ch03 | 49358488..49364040 | PGSC0003DMG400010174 | Peroxisomal membrane 22 kDa family protein         |
| ST4.03ch03 | 49371716..49373868 | PGSC0003DMG400010173 | Avr9/Cf-9 rapidly elicited protein 140             |
| ST4.03ch03 | 49375470..49376370 | PGSC0003DMG400010149 | Conserved gene of unknown function                 |
| ST4.03ch03 | 49377506..49378824 | PGSC0003DMG400010148 | Miraculin                                          |
| ST4.03ch03 | 49385273..49385821 | PGSC0003DMG400045366 | Conserved gene of unknown function                 |
| ST4.03ch03 | 49392670..49393484 | PGSC0003DMG400010147 | Kunitz-type enzyme inhibitor S9C11                 |
| ST4.03ch03 | 49448372..49449153 | PGSC0003DMG400010146 | Kunitz-type tuber invertase inhibitor              |
| ST4.03ch03 | 49463988..49464383 | PGSC0003DMG400045144 | Gene of unknown function                           |
| ST4.03ch03 | 49498051..49498873 | PGSC0003DMG400010145 | Cysteine protease inhibitor 9                      |
| ST4.03ch03 | 49514289..49514969 | PGSC0003DMG400010144 | Stigma expressed protein                           |
| ST4.03ch03 | 49548299..49549151 | PGSC0003DMG400010143 | Cysteine protease inhibitor 1                      |
| ST4.03ch03 | 49567115..49567661 | PGSC0003DMG400010189 | Gene of unknown function                           |
| ST4.03ch03 | 49611604..49612275 | PGSC0003DMG400010141 | Stigma expressed protein                           |
| ST4.03ch03 | 49629957..49632989 | PGSC0003DMG400010140 | Succinic semialdehyde reductase isoform2           |
| ST4.03ch03 | 49644579..49645247 | PGSC0003DMG400010139 | Cysteine protease inhibitor 1                      |
| ST4.03ch03 | 49665048..49665619 | PGSC0003DMG400010188 | Gene of unknown function                           |
| ST4.03ch03 | 49685391..49686264 | PGSC0003DMG400010137 | Cysteine protease inhibitor 1                      |
| ST4.03ch03 | 49713158..49714012 | PGSC0003DMG400010136 | Stigma expressed protein                           |
| ST4.03ch03 | 49754402..49754857 | PGSC0003DMG400010135 | Ethylene-responsive element-binding family protein |
| ST4.03ch03 | 49755550..49756903 | PGSC0003DMG400010172 | Gene of unknown function                           |
| ST4.03ch03 | 49773998..49774469 | PGSC0003DMG400010186 | Kunitz-type enzyme inhibitor S9C11                 |
| ST4.03ch03 | 49784928..49785518 | PGSC0003DMG400010134 | Cysteine protease inhibitor 1                      |
| ST4.03ch03 | 49838683..49840071 | PGSC0003DMG400010170 | Miraculin                                          |
| ST4.03ch03 | 49840939..49843914 | PGSC0003DMG400010133 | Sexual organ expressed protein                     |
| ST4.03ch03 | 49859174..49860099 | PGSC0003DMG400010132 | Conserved gene of unknown function                 |
| ST4.03ch03 | 49862777..49863532 | PGSC0003DMG400010131 | Nb cell death marker                               |
| ST4.03ch03 | 49870078..49871332 | PGSC0003DMG400010130 | Conserved gene of unknown function                 |
| ST4.03ch03 | 49926018..49926578 | PGSC0003DMG400009512 | Kunitz-type proteinase inhibitor                   |
| ST4.03ch03 | 49930058..49930845 | PGSC0003DMG400009513 | Aspartic protease inhibitor 5                      |
| ST4.03ch03 | 49933648..49935405 | PGSC0003DMG400036195 | Gene of unknown function                           |
| ST4.03ch03 | 49941306..49942079 | PGSC0003DMG400009514 | Kunitz-type protease inhibitor                     |
| ST4.03ch03 | 49987262..49993251 | PGSC0003DMG400039813 | Gene of unknown function                           |
| ST4.03ch03 | 50030746..50031538 | PGSC0003DMG400004548 | Proteinase inhibitor type-2 CEVI57                 |
| ST4.03ch03 | 50033588..50034132 | PGSC0003DMG400004549 | Proteinase inhibitor type-2 CEVI57                 |
| ST4.03ch03 | 50056094..50056945 | PGSC0003DMG400004547 | Proteinase inhibitor type-2 P303.51                |

|            |                    |                      |                                                          |
|------------|--------------------|----------------------|----------------------------------------------------------|
| ST4.03ch03 | 50110387..50111368 | PGSC0003DMG400015290 | Proteinase inhibitor type-2 CEVI57                       |
| ST4.03ch03 | 50127073..50129569 | PGSC0003DMG400015307 | Gene of unknown function                                 |
| ST4.03ch03 | 50143509..50144247 | PGSC0003DMG400015289 | Proteinase inhibitor type-2 CEVI57                       |
| ST4.03ch03 | 50172620..50181230 | PGSC0003DMG400035007 | Conserved gene of unknown function                       |
| ST4.03ch03 | 50185156..50186034 | PGSC0003DMG400015287 | Proteinase inhibitor type-2 CEVI57                       |
| ST4.03ch03 | 50189248..50189808 | PGSC0003DMG400039762 | Proteinase inhibitor type-2 CEVI57                       |
| ST4.03ch03 | 50197884..50198633 | PGSC0003DMG400015286 | Miraculin                                                |
| ST4.03ch03 | 50225873..50226839 | PGSC0003DMG400015219 | Miraculin                                                |
| ST4.03ch03 | 50228194..50231917 | PGSC0003DMG400015218 | F-box protein interaction domain containing protein      |
| ST4.03ch03 | 50237284..50239059 | PGSC0003DMG400015284 | EMB2016                                                  |
| ST4.03ch03 | 50242011..50244591 | PGSC0003DMG400037483 | Gene of unknown function                                 |
| ST4.03ch03 | 50249138..50250573 | PGSC0003DMG400015217 | F-box protein interaction domain containing protein      |
| ST4.03ch03 | 50253994..50257278 | PGSC0003DMG400015283 | Receptor kinase                                          |
| ST4.03ch03 | 50257731..50259270 | PGSC0003DMG400015282 | F-box protein interaction domain containing protein      |
| ST4.03ch03 | 50259543..50266313 | PGSC0003DMG400015216 | CDT1a protein                                            |
| ST4.03ch03 | 50277358..50284514 | PGSC0003DMG400015281 | Conserved gene of unknown function                       |
| ST4.03ch03 | 50285444..50293060 | PGSC0003DMG400015215 | Asparaginyl-tRNA synthetase, chloroplastic/mitochondrial |
| ST4.03ch03 | 50294700..50298052 | PGSC0003DMG400015280 | Conserved gene of unknown function                       |
| ST4.03ch03 | 50296177..50296648 | PGSC0003DMG400015306 | Gene of unknown function                                 |
| ST4.03ch03 | 50298182..50299202 | PGSC0003DMG400015214 | Conserved gene of unknown function                       |
| ST4.03ch03 | 50299886..50302826 | PGSC0003DMG400015213 | Conserved gene of unknown function                       |
| ST4.03ch03 | 50305587..50313172 | PGSC0003DMG400015212 | Serine/threonine-protein phosphatase                     |
| ST4.03ch03 | 50314691..50324678 | PGSC0003DMG400015211 | Beta-galactosidase                                       |
| ST4.03ch03 | 50329956..50334109 | PGSC0003DMG400015210 | UPF0426 protein, chloroplastic                           |
| ST4.03ch03 | 50339125..50342642 | PGSC0003DMG400015278 | Cytochrome P450                                          |
| ST4.03ch03 | 50343898..50346888 | PGSC0003DMG400015277 | Conserved gene of unknown function                       |
| ST4.03ch03 | 50344166..50350920 | PGSC0003DMG402015209 | NPK2                                                     |
| ST4.03ch03 | 50351723..50357435 | PGSC0003DMG401015209 | Conserved gene of unknown function                       |
| ST4.03ch03 | 50362741..50366176 | PGSC0003DMG400015276 | Serine-threonine protein kinase, plant-type              |
| ST4.03ch03 | 50367048..50368315 | PGSC0003DMG400015275 | Aquaporin, MIP family, TIP subfamily                     |
| ST4.03ch03 | 50368876..50373810 | PGSC0003DMG400015208 | Ser/Thr protein phosphatase family                       |
| ST4.03ch03 | 50374941..50378394 | PGSC0003DMG400015274 | DNA binding protein                                      |
| ST4.03ch03 | 50381093..50388279 | PGSC0003DMG400015273 | Alpha-galactosidase                                      |
| ST4.03ch03 | 50392706..50394025 | PGSC0003DMG400015272 | DNA binding protein                                      |
| ST4.03ch03 | 50401614..50402275 | PGSC0003DMG400015304 | NAD(P)H-quinone oxidoreductase subunit 3, chloroplastic  |
| ST4.03ch03 | 50403123..50405419 | PGSC0003DMG400015271 | P40                                                      |
| ST4.03ch03 | 50406273..50414267 | PGSC0003DMG400015207 | Conserved gene of unknown function                       |
| ST4.03ch03 | 50423170..50427354 | PGSC0003DMG400015270 | ATP-binding cassette transporter                         |
| ST4.03ch03 | 50429992..50431539 | PGSC0003DMG400015269 | GRP 2                                                    |
| ST4.03ch03 | 50431718..50432257 | PGSC0003DMG400015206 | Conserved gene of unknown function                       |
| ST4.03ch03 | 50436856..50443765 | PGSC0003DMG400015268 | Ubiquitin activating enzyme                              |
| ST4.03ch03 | 50449187..50455703 | PGSC0003DMG402015205 | Protein yrdA                                             |
| ST4.03ch03 | 50457307..50460580 | PGSC0003DMG401015205 | TDR8 protein                                             |
| ST4.03ch03 | 50470725..50471314 | PGSC0003DMG400015204 | Conserved gene of unknown function                       |

|            |                    |                      |                                                 |
|------------|--------------------|----------------------|-------------------------------------------------|
| ST4.03ch03 | 50477078..50477923 | PGSC0003DMG400015267 | Kunitz-type protease inhibitor                  |
| ST4.03ch03 | 50478770..50479219 | PGSC0003DMG400015303 | Conserved gene of unknown function              |
| ST4.03ch03 | 50480853..50487293 | PGSC0003DMG400015266 | CBS domain containing protein                   |
| ST4.03ch03 | 50489074..50492190 | PGSC0003DMG400015265 | Phospholipase C 4                               |
| ST4.03ch03 | 50494186..50496764 | PGSC0003DMG400015264 | Thylakoid lumenal 17.9 kDa protein, chloroplast |
| ST4.03ch03 | 50502524..50507168 | PGSC0003DMG400015263 | Nodulin                                         |
| ST4.03ch03 | 50509027..50511444 | PGSC0003DMG400015262 | Heat shock protein binding protein              |
| ST4.03ch03 | 50520674..50521120 | PGSC0003DMG400015261 | Heat shock protein binding protein              |
| ST4.03ch03 | 50526085..50526531 | PGSC0003DMG400039636 | Ccaat-binding transcription factor              |
| ST4.03ch03 | 50535042..50535506 | PGSC0003DMG400015260 | CONSTANS interacting protein 2a                 |
| ST4.03ch03 | 50559294..50564194 | PGSC0003DMG402015259 | CONSTANS interacting protein 2a                 |
| ST4.03ch03 | 50565407..50565925 | PGSC0003DMG401015259 | Gene of unknown function                        |
| ST4.03ch03 | 50565407..50568184 | PGSC0003DMG400015203 | Protein transport protein SEC61 subunit gamma   |
| ST4.03ch03 | 50578693..50579928 | PGSC0003DMG400015258 | DNA-directed RNA polymerase                     |
| ST4.03ch03 | 50581219..50582116 | PGSC0003DMG400015302 | Conserved gene of unknown function              |
| ST4.03ch03 | 50584576..50587529 | PGSC0003DMG402015202 | Reverse transcriptase family member             |
| ST4.03ch03 | 50610508..50614942 | PGSC0003DMG401015202 | Histone acetyltransferase                       |
| ST4.03ch03 | 50616754..50618798 | PGSC0003DMG402015201 | Receptor expression-enhancing protein           |
| ST4.03ch03 | 50625581..50626068 | PGSC0003DMG401015201 | Receptor expression-enhancing protein           |
| ST4.03ch03 | 50628919..50632108 | PGSC0003DMG400015257 | Ribosome                                        |
| ST4.03ch03 | 50652743..50654344 | PGSC0003DMG400015255 | DELLA protein RGL1                              |
| ST4.03ch03 | 50655402..50657234 | PGSC0003DMG400015254 | Nucleoside diphosphate kinase 2, chloroplastic  |
| ST4.03ch03 | 50658327..50662723 | PGSC0003DMG400015200 | GDP-mannose transporter                         |
| ST4.03ch03 | 50663176..50666491 | PGSC0003DMG400015199 | Conserved gene of unknown function              |
| ST4.03ch03 | 50668234..50668746 | PGSC0003DMG400015301 | Conserved gene of unknown function              |
| ST4.03ch03 | 50686141..50689501 | PGSC0003DMG400015253 | Glyceraldehyde-3-phosphate dehydrogenase        |
| ST4.03ch03 | 50690497..50696246 | PGSC0003DMG400015252 | Conserved gene of unknown function              |
| ST4.03ch03 | 50696476..50700303 | PGSC0003DMG400015198 | Amino acid transporter                          |
| ST4.03ch03 | 50702249..50714294 | PGSC0003DMG400015251 | Plastid RNA-binding protein                     |
| ST4.03ch03 | 50723631..50728564 | PGSC0003DMG400015249 | 3-oxoacyl-(Acyl-carrier protein) reductase      |
| ST4.03ch03 | 50728416..50735928 | PGSC0003DMG400015197 | Bromodomain-containing protein                  |
| ST4.03ch03 | 50747649..50749043 | PGSC0003DMG400015196 | Conserved gene of unknown function              |
| ST4.03ch03 | 50794349..50796366 | PGSC0003DMG400015195 | Conserved gene of unknown function              |
| ST4.03ch03 | 50799936..50800979 | PGSC0003DMG400015248 | Immediate early protein homolog                 |
| ST4.03ch03 | 50835985..50839603 | PGSC0003DMG400015194 | Malate synthase                                 |
| ST4.03ch03 | 50843085..50843546 | PGSC0003DMG402015193 | Malate synthase, glyoxysomal                    |
| ST4.03ch03 | 50844030..50844353 | PGSC0003DMG401015193 | Malate synthase                                 |
| ST4.03ch03 | 50846704..50849224 | PGSC0003DMG400015192 | Malate synthase, glyoxysomal                    |
| ST4.03ch03 | 50849874..50855089 | PGSC0003DMG400015191 | Conserved gene of unknown function              |
| ST4.03ch03 | 50869963..50872171 | PGSC0003DMG400015299 | Gene of unknown function                        |
| ST4.03ch03 | 50875724..50885587 | PGSC0003DMG400015246 | Protein tyrosine phosphatase                    |
| ST4.03ch03 | 50885904..50891146 | PGSC0003DMG400015190 | AMP dependent CoA ligase                        |
| ST4.03ch03 | 50893836..50901875 | PGSC0003DMG400015189 | Aspartyl aminopeptidase                         |
| ST4.03ch03 | 50902946..50905075 | PGSC0003DMG400015188 | Auxin-independent growth promoter               |

|            |                    |                      |                                                            |
|------------|--------------------|----------------------|------------------------------------------------------------|
| ST4.03ch03 | 50905849..50909925 | PGSC0003DMG400015187 | Adenylate kinase B                                         |
| ST4.03ch03 | 50913898..50915790 | PGSC0003DMG400015186 | Pentatricopeptide repeat-containing protein, chloroplastic |
| ST4.03ch03 | 50919866..50922316 | PGSC0003DMG400015245 | Ribosomal protein PETRP                                    |
| ST4.03ch03 | 50939847..50943465 | PGSC0003DMG403015244 | Brg-1 associated factor                                    |
| ST4.03ch03 | 50944271..50953745 | PGSC0003DMG402015244 | EMB2746                                                    |
| ST4.03ch03 | 50954189..50957371 | PGSC0003DMG401015244 | Conserved gene of unknown function                         |
| ST4.03ch03 | 50958078..50963959 | PGSC0003DMG400015243 | SAP domain-containing protein                              |
| ST4.03ch03 | 50982145..50983906 | PGSC0003DMG400015185 | Cytochrome P450                                            |
| ST4.03ch03 | 50988577..50990118 | PGSC0003DMG400015184 | Cytochrome P450                                            |
| ST4.03ch03 | 51005600..51007272 | PGSC0003DMG400015183 | Cytochrome P450                                            |
| ST4.03ch03 | 51016453..51018063 | PGSC0003DMG400015242 | Cytochrome P450                                            |
| ST4.03ch03 | 51025275..51029940 | PGSC0003DMG400015241 | AMP-activated protein kinase, gamma regulatory subunit     |
| ST4.03ch03 | 51037214..51039217 | PGSC0003DMG400039752 | Exocyst complex component                                  |
| ST4.03ch03 | 51044566..51049822 | PGSC0003DMG402015240 | Conserved gene of unknown function                         |
| ST4.03ch03 | 51050161..51058160 | PGSC0003DMG401015240 | Ubiquitin-activating enzyme E1 domain-containing protein   |
| ST4.03ch03 | 51053171..51053969 | PGSC0003DMG400015298 | NAD(P)H-quinone oxidoreductase subunit 2 A, chloroplastic  |
| ST4.03ch03 | 51058389..51062068 | PGSC0003DMG400015182 | Deoxycytidylate deaminase                                  |
| ST4.03ch03 | 51062829..51067352 | PGSC0003DMG400015239 | Coproporphyrinogen III oxidase                             |
| ST4.03ch03 | 51066797..51070700 | PGSC0003DMG400015181 | Nucleic acid binding protein                               |
| ST4.03ch03 | 51071358..51079247 | PGSC0003DMG400015180 | Gamma tubulin                                              |
| ST4.03ch03 | 51082104..51091873 | PGSC0003DMG400015238 | Kelch repeat protein                                       |
| ST4.03ch03 | 51103949..51105853 | PGSC0003DMG400015237 | Purine permease                                            |
| ST4.03ch03 | 51122654..51127262 | PGSC0003DMG400015297 | Conserved gene of unknown function                         |
| ST4.03ch03 | 51127315..51129996 | PGSC0003DMG400015178 | Heat shock protein                                         |
| ST4.03ch03 | 51132926..51136036 | PGSC0003DMG400015177 | CONSTANS interacting protein 2a                            |
| ST4.03ch03 | 51139267..51141290 | PGSC0003DMG400015176 | Gene of unknown function                                   |
| ST4.03ch03 | 51155179..51162521 | PGSC0003DMG401015175 | B3 domain-containing protein Os01g0905400                  |
| ST4.03ch03 | 51155205..51156460 | PGSC0003DMG402015175 | Gene of unknown function                                   |
| ST4.03ch03 | 51158056..51158435 | PGSC0003DMG400015294 | Gene of unknown function                                   |
| ST4.03ch03 | 51158674..51159340 | PGSC0003DMG400015293 | Gene of unknown function                                   |
| ST4.03ch03 | 51164499..51165797 | PGSC0003DMG400015236 | Gene of unknown function                                   |
| ST4.03ch03 | 51170046..51172608 | PGSC0003DMG400015235 | Ubiquitin-protein ligase                                   |
| ST4.03ch03 | 51177387..51177785 | PGSC0003DMG400015174 | DUF26 domain-containing protein 2                          |
| ST4.03ch03 | 51192622..51195303 | PGSC0003DMG400015173 | ATP binding protein                                        |
| ST4.03ch03 | 51211912..51212303 | PGSC0003DMG400015292 | ATP binding protein                                        |
| ST4.03ch03 | 51224758..51228491 | PGSC0003DMG400015171 | ATP binding protein                                        |
| ST4.03ch03 | 51230924..51234395 | PGSC0003DMG400015170 | ATP binding protein                                        |
| ST4.03ch03 | 51237136..51239528 | PGSC0003DMG400015169 | Esterase                                                   |
| ST4.03ch03 | 51249900..51306775 | PGSC0003DMG400015233 | Transferase, transferring glycosyl groups                  |
| ST4.03ch03 | 51308561..51318350 | PGSC0003DMG400015168 | Nucleic acid binding protein                               |
| ST4.03ch03 | 51320232..51328435 | PGSC0003DMG400015167 | Zinc finger protein                                        |
| ST4.03ch03 | 51344990..51349516 | PGSC0003DMG400015165 | 2-deoxyglucose-6-phosphate phosphatase                     |
| ST4.03ch03 | 51352514..51353923 | PGSC0003DMG400015164 | Conserved gene of unknown function                         |
| ST4.03ch03 | 51386421..51389350 | PGSC0003DMG400015232 | Pentatricopeptide repeat-containing protein                |



|            |                    |                      |                                                             |
|------------|--------------------|----------------------|-------------------------------------------------------------|
| ST4.03ch03 | 51390262..51396957 | PGSC0003DMG400015231 | Ufm1-specific protease                                      |
| ST4.03ch03 | 51401507..51405421 | PGSC0003DMG400015162 | Nodulation receptor kinase                                  |
| ST4.03ch03 | 51406268..51412317 | PGSC0003DMG400015161 | Replication factor C / DNA polymerase III gamma-tau subunit |
| ST4.03ch03 | 51432584..51434561 | PGSC0003DMG400015230 | Pectate lyase                                               |
| ST4.03ch03 | 51465624..51468593 | PGSC0003DMG400015229 | BTB/POZ domain-containing protein                           |
| ST4.03ch03 | 51470885..51475042 | PGSC0003DMG400015160 | KDEL-tailed cysteine endopeptidase                          |
| ST4.03ch03 | 51471303..51474965 | PGSC0003DMG400015228 | Peptide methionine sulfoxide reductase                      |
| ST4.03ch03 | 51479433..51485736 | PGSC0003DMG402015159 | Protein tipD                                                |
| ST4.03ch03 | 51499826..51500958 | PGSC0003DMG401015159 | Eukaryotic translation initiation factor 2c                 |
| ST4.03ch03 | 51505704..51510446 | PGSC0003DMG400015158 | Protein bem46                                               |
| ST4.03ch03 | 51528931..51531438 | PGSC0003DMG400015227 | Conserved gene of unknown function                          |
| ST4.03ch03 | 51533595..51535855 | PGSC0003DMG400015157 | Receptor kinase                                             |
| ST4.03ch03 | 51543477..51546492 | PGSC0003DMG400015156 | Conserved gene of unknown function                          |
| ST4.03ch03 | 51551313..51555625 | PGSC0003DMG400015226 | Protein-L-isoaspartate O-methyltransferase                  |
| ST4.03ch03 | 51556001..51560104 | PGSC0003DMG400015155 | 28 kDa ribonucleoprotein, chloroplastic                     |
| ST4.03ch03 | 51561898..51566162 | PGSC0003DMG400015154 | Hydrolase, hydrolyzing O-glycosyl compounds                 |
| ST4.03ch03 | 51570170..51578078 | PGSC0003DMG400046688 | Gene of unknown function                                    |
| ST4.03ch03 | 51581151..51583454 | PGSC0003DMG400015225 | Transposase                                                 |
| ST4.03ch03 | 51598600..51599166 | PGSC0003DMG400015222 | Transposase                                                 |
| ST4.03ch03 | 51601379..51606789 | PGSC0003DMG400015153 | Tryptophan biosynthesis protein, trpc                       |
| ST4.03ch03 | 51608762..51617317 | PGSC0003DMG400015152 | Copine                                                      |
| ST4.03ch03 | 51626123..51629028 | PGSC0003DMG400015151 | Cytochrome P450                                             |
| ST4.03ch03 | 51633709..51635114 | PGSC0003DMG400015150 | Cytochrome P450 71A4                                        |
| ST4.03ch03 | 51638104..51639500 | PGSC0003DMG400015149 | Cytochrome P450 71A4                                        |
| ST4.03ch03 | 51641856..51643958 | PGSC0003DMG400015221 | Cytochrome P450 71A2                                        |
| ST4.03ch03 | 51650729..51652620 | PGSC0003DMG400015220 | Cytochrome P450 71A4                                        |
| ST4.03ch03 | 51745310..51745992 | PGSC0003DMG400005554 | Cytochrome P450 71A4                                        |
| ST4.03ch03 | 51812217..51813743 | PGSC0003DMG400018199 | Cytochrome P450 71A4                                        |
| ST4.03ch03 | 51814334..51816154 | PGSC0003DMG400018141 | Cytochrome P450 71A4                                        |
| ST4.03ch03 | 51817344..51819661 | PGSC0003DMG400018140 | Cytochrome P450 71A4                                        |
| ST4.03ch03 | 51821683..51824023 | PGSC0003DMG400018139 | Cytochrome P450 71A4                                        |
| ST4.03ch03 | 51824105..51826186 | PGSC0003DMG400018138 | Cytochrome P450 71A4                                        |
| ST4.03ch03 | 51848408..51849215 | PGSC0003DMG400018136 | Cytochrome P450 71A2                                        |
| ST4.03ch03 | 51857417..51859571 | PGSC0003DMG400018135 | Cytochrome P450 71A4                                        |
| ST4.03ch03 | 51883788..51884984 | PGSC0003DMG400018198 | 70 kDa subunit of replication protein A                     |
| ST4.03ch03 | 51885505..51886302 | PGSC0003DMG400018134 | Cytochrome P450 71A4                                        |
| ST4.03ch03 | 51893606..51894994 | PGSC0003DMG400018133 | Cytochrome P450 71A4                                        |
| ST4.03ch03 | 51897826..51900459 | PGSC0003DMG400018132 | Cytochrome P450 71A2                                        |
| ST4.03ch03 | 51908390..51908728 | PGSC0003DMG400018197 | Cytochrome P450 71A4                                        |
| ST4.03ch03 | 51909751..51911623 | PGSC0003DMG400018131 | CYP71AU1                                                    |
| ST4.03ch03 | 51918881..51919990 | PGSC0003DMG400018196 | CYP71AU1                                                    |
| ST4.03ch03 | 51933988..51937884 | PGSC0003DMG400018195 | Afc                                                         |
| ST4.03ch03 | 51949423..51956787 | PGSC0003DMG400018194 | Conserved gene of unknown function                          |
| ST4.03ch03 | 51957161..51961663 | PGSC0003DMG400018130 | D-3-phosphoglycerate dehydrogenase                          |

|            |                    |                      |                                                  |
|------------|--------------------|----------------------|--------------------------------------------------|
| ST4.03ch03 | 51962141..51966797 | PGSC0003DMG400018193 | Hydrolase                                        |
| ST4.03ch03 | 51966265..51973422 | PGSC0003DMG400018129 | High-affinity nitrate transport system component |
| ST4.03ch03 | 51984424..51988635 | PGSC0003DMG400018192 | Conserved gene of unknown function               |
| ST4.03ch03 | 51989958..51991673 | PGSC0003DMG400018128 | Protein phosphatase 2c                           |
| ST4.03ch03 | 51998069..52005507 | PGSC0003DMG400018191 | Kinase                                           |
| ST4.03ch03 | 52006116..52007990 | PGSC0003DMG400018190 | Elongation factor TuA, chloroplastic             |
| ST4.03ch03 | 52010641..52013263 | PGSC0003DMG400018127 | Protein DEHYDRATION-INDUCED 19 homolog 6         |
| ST4.03ch03 | 52023650..52024174 | PGSC0003DMG400040957 | Pectinesterase inhibitor                         |
| ST4.03ch03 | 52075082..52075546 | PGSC0003DMG400034620 | Pectinesterase inhibitor                         |
| ST4.03ch03 | 52079987..52080508 | PGSC0003DMG400018189 | Pectinesterase inhibitor                         |
| ST4.03ch03 | 52085642..52086187 | PGSC0003DMG400018188 | Ubiquitin-protein ligase                         |
| ST4.03ch03 | 52101613..52106705 | PGSC0003DMG400018187 | Pentatricopeptide repeat-containing protein      |
| ST4.03ch03 | 52107190..52108048 | PGSC0003DMG400018186 | Conserved gene of unknown function               |
| ST4.03ch03 | 52108928..52109738 | PGSC0003DMG400018125 | Gene of unknown function                         |
| ST4.03ch03 | 52111014..52111628 | PGSC0003DMG400018124 | Gene of unknown function                         |
| ST4.03ch03 | 52119132..52119801 | PGSC0003DMG400018123 | Gene of unknown function                         |
| ST4.03ch03 | 52121801..52126137 | PGSC0003DMG400018122 | Zinc ion binding protein                         |
| ST4.03ch03 | 52133169..52133993 | PGSC0003DMG400018121 | Conserved gene of unknown function               |
| ST4.03ch03 | 52145382..52146343 | PGSC0003DMG400042642 | Conserved gene of unknown function               |
| ST4.03ch03 | 52147910..52149090 | PGSC0003DMG400018209 | Gene of unknown function                         |
| ST4.03ch03 | 52151644..52154051 | PGSC0003DMG400018120 | TRANSPARENT TESTA 12 protein                     |
| ST4.03ch03 | 52160096..52162997 | PGSC0003DMG400018119 | TRANSPARENT TESTA 12 protein                     |
| ST4.03ch03 | 52176377..52179267 | PGSC0003DMG400018118 | MATE efflux family protein                       |
| ST4.03ch03 | 52180061..52184884 | PGSC0003DMG400018117 | Leucine-rich repeat-containing protein           |
| ST4.03ch03 | 52185305..52190958 | PGSC0003DMG400018116 | C2 and GRAM domain-containing protein            |
| ST4.03ch03 | 52194200..52199382 | PGSC0003DMG400018185 | Conserved gene of unknown function               |
| ST4.03ch03 | 52202443..52204300 | PGSC0003DMG400018115 | ATP binding protein                              |
| ST4.03ch03 | 52212143..52214553 | PGSC0003DMG400018184 | Carbohydrate binding protein                     |
| ST4.03ch03 | 52215659..52218666 | PGSC0003DMG400018114 | ATFRO8/FRO8                                      |
| ST4.03ch03 | 52222534..52225055 | PGSC0003DMG400018183 | ATP binding protein                              |
| ST4.03ch03 | 52228924..52230643 | PGSC0003DMG400018182 | Ring finger protein                              |
| ST4.03ch03 | 52233126..52242171 | PGSC0003DMG400018181 | DEAD-box ATP-dependent RNA helicase 30           |
| ST4.03ch03 | 52242765..52243471 | PGSC0003DMG400018180 | Ribosomal protein L27a                           |
| ST4.03ch03 | 52247234..52250103 | PGSC0003DMG400018179 | Armadillo/beta-catenin repeat family protein     |
| ST4.03ch03 | 52251311..52253379 | PGSC0003DMG400018113 | R2r3-myb transcription factor                    |
| ST4.03ch03 | 52276012..52276389 | PGSC0003DMG400018207 | Gene of unknown function                         |
| ST4.03ch03 | 52277098..52280098 | PGSC0003DMG400018178 | Histone deacetylase                              |
| ST4.03ch03 | 52281585..52284607 | PGSC0003DMG400018177 | Pentatricopeptide repeat-containing protein      |
| ST4.03ch03 | 52299410..52301453 | PGSC0003DMG400018112 | Protein LATERAL ORGAN BOUNDARIES                 |
| ST4.03ch03 | 52311805..52312667 | PGSC0003DMG400018176 | Oleosin                                          |
| ST4.03ch03 | 52333022..52338905 | PGSC0003DMG400018110 | Alliin lyase                                     |
| ST4.03ch03 | 52344712..52345833 | PGSC0003DMG400045225 | Gene of unknown function                         |
| ST4.03ch03 | 52369689..52370336 | PGSC0003DMG400037301 | NB-ARC domain containing protein                 |
| ST4.03ch03 | 52379137..52380159 | PGSC0003DMG400034404 | Gene of unknown function                         |

|            |                    |                      |                                                            |
|------------|--------------------|----------------------|------------------------------------------------------------|
| ST4.03ch03 | 52382294..52383250 | PGSC0003DMG400045825 | Gene of unknown function                                   |
| ST4.03ch03 | 52385241..52385546 | PGSC0003DMG400034803 | Gene of unknown function                                   |
| ST4.03ch03 | 52396390..52399121 | PGSC0003DMG400018109 | Raffionse synthase 2                                       |
| ST4.03ch03 | 52400123..52405683 | PGSC0003DMG400018175 | Nucleic acid binding                                       |
| ST4.03ch03 | 52405924..52413862 | PGSC0003DMG400018108 | FKBP12-interacting protein of 37 kDa                       |
| ST4.03ch03 | 52414815..52424083 | PGSC0003DMG400018107 | Notchless                                                  |
| ST4.03ch03 | 52432496..52437414 | PGSC0003DMG400018174 | Short-chain dehydrogenase                                  |
| ST4.03ch03 | 52438388..52445179 | PGSC0003DMG400018106 | Conserved gene of unknown function                         |
| ST4.03ch03 | 52448904..52453290 | PGSC0003DMG400018173 | Pentatricopeptide repeat-containing protein, mitochondrial |
| ST4.03ch03 | 52455323..52465052 | PGSC0003DMG400018172 | Conserved gene of unknown function                         |
| ST4.03ch03 | 52473676..52478435 | PGSC0003DMG400018171 | Receptor protein kinase                                    |
| ST4.03ch03 | 52481260..52482408 | PGSC0003DMG400018105 | Ubiquitin-protein ligase                                   |
| ST4.03ch03 | 52483744..52487983 | PGSC0003DMG400018104 | Cell division cycle protein 48                             |
| ST4.03ch03 | 52489653..52490699 | PGSC0003DMG400034990 | F-box protein interaction domain containing protein        |
| ST4.03ch03 | 52492633..52493652 | PGSC0003DMG400018170 | Conserved gene of unknown function                         |
| ST4.03ch03 | 52500043..52503055 | PGSC0003DMG400018169 | Cyclin D2.1 protein                                        |
| ST4.03ch03 | 52503527..52508405 | PGSC0003DMG400018168 | Transcription factor                                       |
| ST4.03ch03 | 52510915..52514983 | PGSC0003DMG400018103 | Carboxyl-terminal proteinase                               |
| ST4.03ch03 | 52524053..52526862 | PGSC0003DMG400018167 | UBX domain-containing protein 8-B                          |
| ST4.03ch03 | 52538882..52543092 | PGSC0003DMG400018166 | Transporter                                                |
| ST4.03ch03 | 52544054..52546874 | PGSC0003DMG400018165 | Heme-binding protein                                       |
| ST4.03ch03 | 52555424..52563443 | PGSC0003DMG402018164 | Protein MODIFIER OF SNC1 1                                 |
| ST4.03ch03 | 52564527..52570400 | PGSC0003DMG401018164 | EMB2759                                                    |
| ST4.03ch03 | 52576899..52580137 | PGSC0003DMG400018163 | Serine-threonine protein kinase, plant-type                |
| ST4.03ch03 | 52581838..52584136 | PGSC0003DMG400018162 | Trithorax                                                  |
| ST4.03ch03 | 52584257..52585523 | PGSC0003DMG400018102 | Calmodulin-binding protein                                 |
| ST4.03ch03 | 52587339..52587794 | PGSC0003DMG400040180 | SKP1 1                                                     |
| ST4.03ch03 | 52589288..52592358 | PGSC0003DMG400018161 | Ubiquitin carrier protein                                  |
| ST4.03ch03 | 52593703..52596962 | PGSC0003DMG400018101 | BRASSINOSTEROID INSENSITIVE 1-associated receptor kinase 1 |
| ST4.03ch03 | 52597981..52598441 | PGSC0003DMG400037011 | Homeobox 9                                                 |
| ST4.03ch03 | 52600416..52602649 | PGSC0003DMG400018100 | Homeobox 9                                                 |
| ST4.03ch03 | 52611505..52613549 | PGSC0003DMG400018160 | Conserved gene of unknown function                         |
| ST4.03ch03 | 52616469..52623072 | PGSC0003DMG400018099 | Structure-specific recognition protein                     |
| ST4.03ch03 | 52624191..52626893 | PGSC0003DMG400018098 | Conserved gene of unknown function                         |
| ST4.03ch03 | 52628876..52633639 | PGSC0003DMG402018159 | Ubiquitin carrier protein                                  |
| ST4.03ch03 | 52635181..52637606 | PGSC0003DMG400018206 | Conserved gene of unknown function                         |
| ST4.03ch03 | 52637713..52638405 | PGSC0003DMG401018159 | Conserved gene of unknown function                         |
| ST4.03ch03 | 52650396..52659108 | PGSC0003DMG400018158 | Conserved gene of unknown function                         |
| ST4.03ch03 | 52659498..52662549 | PGSC0003DMG400018157 | Glutaredoxin                                               |
| ST4.03ch03 | 52662939..52664521 | PGSC0003DMG400018156 | Ubiquitin-protein ligase                                   |
| ST4.03ch03 | 52670509..52671847 | PGSC0003DMG400018155 | Ubiquitin-protein ligase                                   |
| ST4.03ch03 | 52672407..52674636 | PGSC0003DMG400018097 | Conserved gene of unknown function                         |
| ST4.03ch03 | 52679293..52682714 | PGSC0003DMG400018154 | Conserved gene of unknown function                         |
| ST4.03ch03 | 52682813..52688251 | PGSC0003DMG400018096 | U3 small nucleolar ribonucleoprotein protein mpp10         |

|            |                    |                      |                                                |
|------------|--------------------|----------------------|------------------------------------------------|
| ST4.03ch03 | 52709732..52710076 | PGSC0003DMG400037864 | Raffionse synthase 2                           |
| ST4.03ch03 | 52720586..52721251 | PGSC0003DMG400034843 | Gene of unknown function                       |
| ST4.03ch03 | 52732972..52733406 | PGSC0003DMG400039684 | Gene of unknown function                       |
| ST4.03ch03 | 52736187..52740429 | PGSC0003DMG400018153 | Gibberellin receptor GID1                      |
| ST4.03ch03 | 52754214..52756452 | PGSC0003DMG400018095 | Conserved gene of unknown function             |
| ST4.03ch03 | 52761138..52762995 | PGSC0003DMG400018094 | Ribosomal protein L41                          |
| ST4.03ch03 | 52767118..52770081 | PGSC0003DMG401018151 | Pre-mRNA-splicing factor cwc23                 |
| ST4.03ch03 | 52767195..52772875 | PGSC0003DMG402018151 | ATP binding protein                            |
| ST4.03ch03 | 52773840..52778005 | PGSC0003DMG400018150 | Phosphate/phosphoenolpyruvate translocator     |
| ST4.03ch03 | 52778937..52780494 | PGSC0003DMG400018093 | Fasciclin-like arabinogalactan protein 9       |
| ST4.03ch03 | 52782806..52785051 | PGSC0003DMG400018092 | Myb family transcription factor                |
| ST4.03ch03 | 52790743..52794203 | PGSC0003DMG400018149 | Iron-sulfur cluster scaffold protein ISU1      |
| ST4.03ch03 | 52795727..52815228 | PGSC0003DMG400018148 | ATPANK2 (PANTOTHENATE KINASE 2)                |
| ST4.03ch03 | 52818309..52821055 | PGSC0003DMG400018091 | Nucleic acid binding protein                   |
| ST4.03ch03 | 52832337..52834480 | PGSC0003DMG400018090 | F-box family protein                           |
| ST4.03ch03 | 52904555..52905920 | PGSC0003DMG400018147 | Gene of unknown function                       |
| ST4.03ch03 | 52906784..52909093 | PGSC0003DMG400018146 | Pectinesterase                                 |
| ST4.03ch03 | 52909271..52910258 | PGSC0003DMG400018145 | Enzyme inhibitor                               |
| ST4.03ch03 | 52923766..52930958 | PGSC0003DMG400018089 | Chromosome structural maintenance protein      |
| ST4.03ch03 | 52940329..52944148 | PGSC0003DMG400018088 | F-box family protein                           |
| ST4.03ch03 | 52956526..52957985 | PGSC0003DMG400018087 | Conserved gene of unknown function             |
| ST4.03ch03 | 52961160..52962359 | PGSC0003DMG400018086 | Ubiquitin-protein ligase                       |
| ST4.03ch03 | 52965443..52966779 | PGSC0003DMG400018085 | F-box domain containing protein                |
| ST4.03ch03 | 52975177..52979518 | PGSC0003DMG400018144 | Vacuolar protein sorting                       |
| ST4.03ch03 | 52979750..52982411 | PGSC0003DMG400018084 | Aldose-1-epimerase                             |
| ST4.03ch03 | 53020278..53027861 | PGSC0003DMG402018143 | ABC transporter A family member 2              |
| ST4.03ch03 | 53028781..53031719 | PGSC0003DMG401018143 | Conserved gene of unknown function             |
| ST4.03ch03 | 53032298..53037916 | PGSC0003DMG400018082 | Ubiquitin carrier protein                      |
| ST4.03ch03 | 53041644..53045794 | PGSC0003DMG400018081 | WRKY72                                         |
| ST4.03ch03 | 53057787..53061213 | PGSC0003DMG400018080 | Conserved gene of unknown function             |
| ST4.03ch03 | 53062734..53066698 | PGSC0003DMG400018079 | Nuclear ribonuclease Z                         |
| ST4.03ch03 | 53068010..53070815 | PGSC0003DMG400018142 | Pectate lyase                                  |
| ST4.03ch03 | 53072141..53073610 | PGSC0003DMG400018078 | Ubiquitin-protein ligase                       |
| ST4.03ch03 | 53074920..53076092 | PGSC0003DMG400018077 | Conserved gene of unknown function             |
| ST4.03ch03 | 53138385..53139192 | PGSC0003DMG400025350 | Small heat-shock protein                       |
| ST4.03ch03 | 53140092..53149526 | PGSC0003DMG400025349 | ATP-dependent Clp protease proteolytic subunit |
| ST4.03ch03 | 53153671..53158806 | PGSC0003DMG400025348 | Quirky                                         |
| ST4.03ch03 | 53159296..53160057 | PGSC0003DMG400025347 | ABR064Wp                                       |
| ST4.03ch03 | 53160568..53162079 | PGSC0003DMG400025346 | Voltage-dependent anion channel                |
| ST4.03ch03 | 53162164..53165206 | PGSC0003DMG400025335 | Hypersensitive-induced reaction protein        |
| ST4.03ch03 | 53171883..53173398 | PGSC0003DMG400025345 | Conserved gene of unknown function             |
| ST4.03ch03 | 53173772..53178316 | PGSC0003DMG400025334 | Nitrate transporter                            |
| ST4.03ch03 | 53184212..53185070 | PGSC0003DMG400025344 | Gene of unknown function                       |
| ST4.03ch03 | 53190265..53191554 | PGSC0003DMG400025333 | Short chain alcohol dehydrogenase              |

|            |                    |                      |                                                            |
|------------|--------------------|----------------------|------------------------------------------------------------|
| ST4.03ch03 | 53203041..53205307 | PGSC0003DMG400025342 | Homeobox                                                   |
| ST4.03ch03 | 53209658..53214943 | PGSC0003DMG400025332 | Integral membrane HPP family protein                       |
| ST4.03ch03 | 53219916..53220716 | PGSC0003DMG400044826 | Conserved gene of unknown function                         |
| ST4.03ch03 | 53226137..53226624 | PGSC0003DMG400025341 | Gene of unknown function                                   |
| ST4.03ch03 | 53227052..53228846 | PGSC0003DMG400025331 | Short chain alcohol dehydrogenase                          |
| ST4.03ch03 | 53228956..53233993 | PGSC0003DMG400025330 | BRASSINOSTEROID INSENSITIVE 1-associated receptor kinase 1 |
| ST4.03ch03 | 53235911..53238548 | PGSC0003DMG400025339 | Nitrate transporter                                        |
| ST4.03ch03 | 53243878..53244450 | PGSC0003DMG400025338 | Gene of unknown function                                   |
| ST4.03ch03 | 53260486..53262884 | PGSC0003DMG400025337 | Nitrate transporter                                        |
| ST4.03ch03 | 53269753..53273630 | PGSC0003DMG400025336 | Nitrate transporter NRT1-5                                 |
| ST4.03ch03 | 53276654..53283732 | PGSC0003DMG400025328 | Plasma membrane ATPase 1                                   |
| ST4.03ch03 | 53299059..53299562 | PGSC0003DMG400017117 | Gene of unknown function                                   |
| ST4.03ch03 | 53307178..53312264 | PGSC0003DMG400017116 | Nodulin family protein                                     |
| ST4.03ch03 | 53312698..53316721 | PGSC0003DMG400017115 | Nodulin family protein                                     |
| ST4.03ch03 | 53393151..53400243 | PGSC0003DMG400013184 | Zinc finger protein                                        |
| ST4.03ch03 | 53401591..53404834 | PGSC0003DMG400013182 | LOB domain-containing protein                              |
| ST4.03ch03 | 53409812..53418049 | PGSC0003DMG400013181 | Ubiquitin thiolesterase/ zinc ion binding                  |
| ST4.03ch03 | 53421004..53425909 | PGSC0003DMG400013180 | Pentatricopeptide repeat-containing protein                |
| ST4.03ch03 | 53433747..53439804 | PGSC0003DMG400013183 | Calcium-dependent protein kinase 1                         |
| ST4.03ch03 | 53496881..53497354 | PGSC0003DMG400024668 | Gene of unknown function                                   |
| ST4.03ch03 | 53497641..53498274 | PGSC0003DMG400024563 | Gene of unknown function                                   |
| ST4.03ch03 | 53507685..53510025 | PGSC0003DMG400024458 | HIPL1 protein                                              |
| ST4.03ch03 | 53510985..53512068 | PGSC0003DMG400024564 | Conserved gene of unknown function                         |
| ST4.03ch03 | 53518677..53522587 | PGSC0003DMG400024459 | HIPL1 protein                                              |
| ST4.03ch03 | 53536006..53538645 | PGSC0003DMG400024460 | TRNA ligase                                                |
| ST4.03ch03 | 53538807..53540440 | PGSC0003DMG400024566 | Conserved gene of unknown function                         |
| ST4.03ch03 | 53540506..53544562 | PGSC0003DMG400024567 | Galactosyltransferase                                      |
| ST4.03ch03 | 53549065..53550718 | PGSC0003DMG400024461 | Conserved gene of unknown function                         |
| ST4.03ch03 | 53552433..53554202 | PGSC0003DMG400024462 | Axonemal dynein light chain                                |
| ST4.03ch03 | 53560253..53564066 | PGSC0003DMG401024463 | DNA binding protein                                        |
| ST4.03ch03 | 53562621..53564066 | PGSC0003DMG402024463 | Gene of unknown function                                   |
| ST4.03ch03 | 53565261..53565923 | PGSC0003DMG400024568 | Rhcadhesin receptor                                        |
| ST4.03ch03 | 53567366..53568413 | PGSC0003DMG400024569 | Rhcadhesin receptor                                        |
| ST4.03ch03 | 53569914..53573217 | PGSC0003DMG400024570 | 5-formyltetrahydrofolate cycloligase                       |
| ST4.03ch03 | 53574169..53577852 | PGSC0003DMG400024464 | Conserved gene of unknown function                         |
| ST4.03ch03 | 53578162..53583986 | PGSC0003DMG400024571 | Conserved gene of unknown function                         |
| ST4.03ch03 | 53594044..53595185 | PGSC0003DMG400041939 | Ubiquitin-protein ligase                                   |
| ST4.03ch03 | 53602333..53603983 | PGSC0003DMG400024572 | MYB transcription factor                                   |
| ST4.03ch03 | 53618233..53623994 | PGSC0003DMG400024573 | Pentatricopeptide repeat-containing protein, chloroplastic |
| ST4.03ch03 | 53624273..53638935 | PGSC0003DMG400024574 | Conserved gene of unknown function                         |
| ST4.03ch03 | 53653286..53663670 | PGSC0003DMG400024465 | Conserved gene of unknown function                         |
| ST4.03ch03 | 53664130..53668654 | PGSC0003DMG400024575 | Microtubule-associated protein TORTIFOLIA1                 |
| ST4.03ch03 | 53683860..53686179 | PGSC0003DMG400024466 | ATP-binding cassette transporter                           |
| ST4.03ch03 | 53694121..53695966 | PGSC0003DMG400024467 | Putative anti-virus transcriptional factor                 |

|            |                    |                      |                                                    |
|------------|--------------------|----------------------|----------------------------------------------------|
| ST4.03ch03 | 53699687..53700358 | PGSC0003DMG400024576 | Gene of unknown function                           |
| ST4.03ch03 | 53703782..53706897 | PGSC0003DMG400024577 | Actin binding protein                              |
| ST4.03ch03 | 53710389..53712417 | PGSC0003DMG400024578 | Type-A response regulator                          |
| ST4.03ch03 | 53717816..53719670 | PGSC0003DMG400024468 | B12D protein                                       |
| ST4.03ch03 | 53719600..53725446 | PGSC0003DMG400024579 | Cell division cycle                                |
| ST4.03ch03 | 53729236..53733274 | PGSC0003DMG401024469 | Pentatricopeptide repeat-containing protein        |
| ST4.03ch03 | 53732690..53737067 | PGSC0003DMG402024469 | E2F                                                |
| ST4.03ch03 | 53737614..53742531 | PGSC0003DMG400024580 | Pyridoxamine 5-phosphate oxidase                   |
| ST4.03ch03 | 53743129..53750825 | PGSC0003DMG401024581 | Pyridoxamine 5-phosphate oxidase                   |
| ST4.03ch03 | 53751474..53756993 | PGSC0003DMG402024581 | Mannose-1-phosphate guanyltransferase              |
| ST4.03ch03 | 53757940..53766241 | PGSC0003DMG400024582 | Aminoaldehyde dehydrogenase 2                      |
| ST4.03ch03 | 53773207..53773694 | PGSC0003DMG400024583 | Conserved gene of unknown function                 |
| ST4.03ch03 | 53775263..53778132 | PGSC0003DMG400024584 | Alpha-n-acetylglucosaminidase                      |
| ST4.03ch03 | 53797414..53798920 | PGSC0003DMG400024470 | F-box and wd40 domain protein                      |
| ST4.03ch03 | 53799509..53804520 | PGSC0003DMG400024585 | Methyltransferase gidB                             |
| ST4.03ch03 | 53807761..53808234 | PGSC0003DMG400024670 | Gene of unknown function                           |
| ST4.03ch03 | 53818291..53820652 | PGSC0003DMG400024471 | Ubiquitin-protein ligase                           |
| ST4.03ch03 | 53823505..53827469 | PGSC0003DMG401024472 | Endonuclease III                                   |
| ST4.03ch03 | 53828218..53829118 | PGSC0003DMG402024472 | C2H2L domain class transcription factor            |
| ST4.03ch03 | 53830836..53833876 | PGSC0003DMG401024473 | Mannosyl-oligosaccharide 1, 2-alpha-mannosidase IA |
| ST4.03ch03 | 53834245..53836806 | PGSC0003DMG402024473 | Gene of unknown function                           |
| ST4.03ch03 | 53841278..53844424 | PGSC0003DMG400024474 | Gonadotropin beta chain                            |
| ST4.03ch03 | 53866220..53872744 | PGSC0003DMG400024475 | Calmodulin binding protein                         |
| ST4.03ch03 | 53878612..53879610 | PGSC0003DMG400024476 | Heat-shock protein                                 |
| ST4.03ch03 | 53883494..53884399 | PGSC0003DMG400024671 | Gene of unknown function                           |
| ST4.03ch03 | 53891239..53893065 | PGSC0003DMG400024477 | Calmodulin binding protein                         |
| ST4.03ch03 | 53897293..53901168 | PGSC0003DMG400024478 | Calmodulin-binding protein                         |
| ST4.03ch03 | 53911132..53916455 | PGSC0003DMG400024479 | Calmodulin-binding protein                         |
| ST4.03ch03 | 53926690..53931992 | PGSC0003DMG401024480 | Conserved gene of unknown function                 |
| ST4.03ch03 | 53957004..53960677 | PGSC0003DMG402024480 | Gene of unknown function                           |
| ST4.03ch03 | 53957004..53961462 | PGSC0003DMG400024586 | PBng143                                            |
| ST4.03ch03 | 53970890..53973411 | PGSC0003DMG400024481 | Pollen specific LIM domain-containing protein      |
| ST4.03ch03 | 53973615..53976517 | PGSC0003DMG400024482 | Pentatricopeptide repeat protein                   |
| ST4.03ch03 | 53980366..53981973 | PGSC0003DMG400024587 | Conserved gene of unknown function                 |
| ST4.03ch03 | 53992509..53999728 | PGSC0003DMG400024588 | Permease I                                         |
| ST4.03ch03 | 54006159..54007939 | PGSC0003DMG400024589 | Protein PRD1                                       |
| ST4.03ch03 | 54016250..54023228 | PGSC0003DMG400024483 | Structural constituent of ribosome                 |
| ST4.03ch03 | 54027001..54035855 | PGSC0003DMG400024484 | BAH domain-containing protein                      |
| ST4.03ch03 | 54027811..54028808 | PGSC0003DMG400024673 | Gene of unknown function                           |
| ST4.03ch03 | 54036158..54044679 | PGSC0003DMG402024590 | Rac protein                                        |
| ST4.03ch03 | 54042117..54044321 | PGSC0003DMG401024590 | Rac protein                                        |
| ST4.03ch03 | 54051726..54054216 | PGSC0003DMG400024485 | Serine-threonine protein kinase, plant-type        |
| ST4.03ch03 | 54057013..54057951 | PGSC0003DMG400040994 | Ring finger protein                                |
| ST4.03ch03 | 54059590..54060328 | PGSC0003DMG400024486 | Conserved gene of unknown function                 |

|            |                    |                      |                                                                      |
|------------|--------------------|----------------------|----------------------------------------------------------------------|
| ST4.03ch03 | 54061000..54066772 | PGSC0003DMG400024591 | Cyclic nucleotide-gated ion channel 16                               |
| ST4.03ch03 | 54068745..54069866 | PGSC0003DMG400024487 | RNA binding protein                                                  |
| ST4.03ch03 | 54072511..54073496 | PGSC0003DMG400024488 | IS10 transposase                                                     |
| ST4.03ch03 | 54088348..54093737 | PGSC0003DMG400024489 | Sugar transporter                                                    |
| ST4.03ch03 | 54102305..54107157 | PGSC0003DMG400024490 | Aldehyde dehydrogenase                                               |
| ST4.03ch03 | 54110767..54113181 | PGSC0003DMG400024491 | Spotted leaf protein                                                 |
| ST4.03ch03 | 54116300..54119783 | PGSC0003DMG400024492 | Deleted in split hand/splt foot protein 1                            |
| ST4.03ch03 | 54121762..54123763 | PGSC0003DMG400024593 | Glycosyltransferase UGT90A7                                          |
| ST4.03ch03 | 54125552..54128245 | PGSC0003DMG400024594 | Glycosyltransferase UGT90A7                                          |
| ST4.03ch03 | 54135534..54136366 | PGSC0003DMG400024595 | Zinc finger protein                                                  |
| ST4.03ch03 | 54139914..54140882 | PGSC0003DMG400024493 | Seven-transmembrane-domain protein 1                                 |
| ST4.03ch03 | 54141229..54146751 | PGSC0003DMG400024596 | Protein kinase atmrk1                                                |
| ST4.03ch03 | 54149532..54150359 | PGSC0003DMG400046943 | NAC transcription factor                                             |
| ST4.03ch03 | 54170568..54171266 | PGSC0003DMG400045571 | NAC transcription factor                                             |
| ST4.03ch03 | 54181378..54182621 | PGSC0003DMG400024597 | DNA binding protein                                                  |
| ST4.03ch03 | 54247606..54248172 | PGSC0003DMG400024598 | DNA binding protein                                                  |
| ST4.03ch03 | 54259488..54260780 | PGSC0003DMG400024599 | Polygalacturonase-1 non-catalytic subunit beta                       |
| ST4.03ch03 | 54266590..54268781 | PGSC0003DMG400024494 | Phosphoglycerate mutase                                              |
| ST4.03ch03 | 54281887..54282522 | PGSC0003DMG400024495 | DNA binding protein                                                  |
| ST4.03ch03 | 54285706..54286826 | PGSC0003DMG400043406 | Ubiquitin-protein ligase                                             |
| ST4.03ch03 | 54289906..54290359 | PGSC0003DMG400024496 | Ulp1 protease family, C-terminal catalytic domain containing protein |
| ST4.03ch03 | 54304129..54310985 | PGSC0003DMG400024497 | Zinc finger family protein                                           |
| ST4.03ch03 | 54312619..54315441 | PGSC0003DMG400024498 | UPF0497 membrane protein                                             |
| ST4.03ch03 | 54316402..54322812 | PGSC0003DMG400024499 | Para-hydroxybenzoate--polyprenyltransferase                          |
| ST4.03ch03 | 54329272..54335041 | PGSC0003DMG400024500 | HT1 protein kinase                                                   |
| ST4.03ch03 | 54348113..54351370 | PGSC0003DMG400024501 | Kinesin light chain                                                  |
| ST4.03ch03 | 54355980..54363363 | PGSC0003DMG400024502 | AtPex14p                                                             |
| ST4.03ch03 | 54368432..54374033 | PGSC0003DMG400024503 | 1-deoxy-D-xylulose-5-phosphate reductoisomerase                      |
| ST4.03ch03 | 54398719..54399968 | PGSC0003DMG400024504 | Conserved gene of unknown function                                   |
| ST4.03ch03 | 54417167..54419695 | PGSC0003DMG400024600 | Conserved gene of unknown function                                   |
| ST4.03ch03 | 54440605..54441423 | PGSC0003DMG400040550 | NAC transcription factor                                             |
| ST4.03ch03 | 54445376..54448068 | PGSC0003DMG400024675 | Gene of unknown function                                             |
| ST4.03ch03 | 54460915..54461706 | PGSC0003DMG400045663 | NAC transcription factor                                             |
| ST4.03ch03 | 54462729..54470280 | PGSC0003DMG400024601 | Dead box ATP-dependent RNA helicase                                  |
| ST4.03ch03 | 54472475..54477646 | PGSC0003DMG400024505 | Chromosome-associated kinesin KIF4A                                  |
| ST4.03ch03 | 54480475..54481506 | PGSC0003DMG400024602 | Conserved gene of unknown function                                   |
| ST4.03ch03 | 54482662..54484036 | PGSC0003DMG402024603 | DR1                                                                  |
| ST4.03ch03 | 54482662..54486225 | PGSC0003DMG401024603 | TATA-binding protein-associated phosphoprotein                       |
| ST4.03ch03 | 54485667..54486191 | PGSC0003DMG400024506 | Gene of unknown function                                             |
| ST4.03ch03 | 54499470..54500427 | PGSC0003DMG400024507 | Gene of unknown function                                             |
| ST4.03ch03 | 54508886..54509597 | PGSC0003DMG400024604 | Calmodulin                                                           |
| ST4.03ch03 | 54514242..54515501 | PGSC0003DMG400024605 | Ubiquitin-protein ligase                                             |
| ST4.03ch03 | 54516634..54516957 | PGSC0003DMG400041876 | Conserved gene of unknown function                                   |
| ST4.03ch03 | 54533650..54534364 | PGSC0003DMG400024606 | ERF transcription factor                                             |



|            |                    |                      |                                             |
|------------|--------------------|----------------------|---------------------------------------------|
| ST4.03ch03 | 54537065..54540400 | PGSC0003DMG400024508 | Extracellular Ca2+ sensing receptor         |
| ST4.03ch03 | 54542358..54546406 | PGSC0003DMG401024509 | Acetyl-CoA synthetase                       |
| ST4.03ch03 | 54546628..54553861 | PGSC0003DMG402024509 | Acetyl-CoA synthetase                       |
| ST4.03ch03 | 54554175..54558025 | PGSC0003DMG403024509 | Cell growth defect factor                   |
| ST4.03ch03 | 54558654..54565189 | PGSC0003DMG402024607 | Senescence-associated protein               |
| ST4.03ch03 | 54561847..54562704 | PGSC0003DMG400045477 | Senescence-associated protein 5             |
| ST4.03ch03 | 54563683..54567546 | PGSC0003DMG401024607 | Conserved gene of unknown function          |
| ST4.03ch03 | 54572440..54573754 | PGSC0003DMG400024608 | Senescence-associated protein               |
| ST4.03ch03 | 54580617..54585154 | PGSC0003DMG401024510 | Enolase                                     |
| ST4.03ch03 | 54584634..54585092 | PGSC0003DMG402024510 | Gene of unknown function                    |
| ST4.03ch03 | 54585371..54590436 | PGSC0003DMG400024609 | Conserved gene of unknown function          |
| ST4.03ch03 | 54592800..54599988 | PGSC0003DMG400024511 | MIS12 homologue                             |
| ST4.03ch03 | 54601440..54604655 | PGSC0003DMG402024610 | Conserved gene of unknown function          |
| ST4.03ch03 | 54608969..54610252 | PGSC0003DMG400024611 | Conserved gene of unknown function          |
| ST4.03ch03 | 54616709..54617351 | PGSC0003DMG403024610 | Conserved gene of unknown function          |
| ST4.03ch03 | 54619356..54620651 | PGSC0003DMG401024610 | Conserved gene of unknown function          |
| ST4.03ch03 | 54625568..54632815 | PGSC0003DMG400024512 | H/ACA ribonucleoprotein complex subunit     |
| ST4.03ch03 | 54627728..54639244 | PGSC0003DMG400024612 | Uridine cytidine kinase I                   |
| ST4.03ch03 | 54653788..54658842 | PGSC0003DMG400024513 | Serine/threonine protein kinase             |
| ST4.03ch03 | 54656234..54659205 | PGSC0003DMG400024613 | Protein ASC1                                |
| ST4.03ch03 | 54665923..54666739 | PGSC0003DMG400024514 | Gene of unknown function                    |
| ST4.03ch03 | 54668202..54668507 | PGSC0003DMG400024515 | Conserved gene of unknown function          |
| ST4.03ch03 | 54671247..54671681 | PGSC0003DMG400024516 | Conserved gene of unknown function          |
| ST4.03ch03 | 54691474..54694326 | PGSC0003DMG401024517 | Protease                                    |
| ST4.03ch03 | 54696661..54697371 | PGSC0003DMG400024518 | Conserved gene of unknown function          |
| ST4.03ch03 | 54698447..54702052 | PGSC0003DMG402024517 | Pentatricopeptide repeat-containing protein |
| ST4.03ch03 | 54709249..54710000 | PGSC0003DMG400024676 | Conserved gene of unknown function          |
| ST4.03ch03 | 54710753..54714249 | PGSC0003DMG400024519 | Pentatricopeptide repeat-containing protein |
| ST4.03ch03 | 54714809..54719299 | PGSC0003DMG400024520 | Conserved gene of unknown function          |
| ST4.03ch03 | 54720513..54724268 | PGSC0003DMG400024614 | Zinc finger protein                         |
| ST4.03ch03 | 54724838..54731754 | PGSC0003DMG400024615 | WD-repeat protein                           |
| ST4.03ch03 | 54742273..54745641 | PGSC0003DMG400024521 | Gene of unknown function                    |
| ST4.03ch03 | 54747304..54749116 | PGSC0003DMG400024522 | Conserved gene of unknown function          |
| ST4.03ch03 | 54758892..54760665 | PGSC0003DMG400024616 | UDP-glucosyltransferase                     |
| ST4.03ch03 | 54771919..54773675 | PGSC0003DMG400024617 | UDP-glucosyltransferase                     |
| ST4.03ch03 | 54778153..54779955 | PGSC0003DMG400024618 | UDP-glucosyltransferase                     |
| ST4.03ch03 | 54796953..54803667 | PGSC0003DMG400024523 | Transcription factor BIM1                   |
| ST4.03ch03 | 54809796..54813578 | PGSC0003DMG400024619 | Conserved gene of unknown function          |
| ST4.03ch03 | 54821626..54822091 | PGSC0003DMG401024620 | Gene of unknown function                    |
| ST4.03ch03 | 54823953..54825022 | PGSC0003DMG402024620 | Gene of unknown function                    |
| ST4.03ch03 | 54823953..54829101 | PGSC0003DMG403024620 | BSD domain containing protein               |
| ST4.03ch03 | 54830434..54831584 | PGSC0003DMG404024620 | Conserved gene of unknown function          |
| ST4.03ch03 | 54835543..54840071 | PGSC0003DMG400024524 | Microtubule-associated protein              |
| ST4.03ch03 | 54840182..54841714 | PGSC0003DMG400024621 | Conserved gene of unknown function          |

|            |                    |                      |                                                    |
|------------|--------------------|----------------------|----------------------------------------------------|
| ST4.03ch03 | 54853249..54860120 | PGSC0003DMG400024525 | Dead box ATP-dependent RNA helicase                |
| ST4.03ch03 | 54860582..54863323 | PGSC0003DMG400024526 | L-asparaginase                                     |
| ST4.03ch03 | 54865153..54866555 | PGSC0003DMG400024622 | Flavonol 4'-sulfotransferase                       |
| ST4.03ch03 | 54867980..54873469 | PGSC0003DMG400024623 | Glycosyltransferase QUASIMODO1                     |
| ST4.03ch03 | 54874088..54876489 | PGSC0003DMG400024624 | Conserved gene of unknown function                 |
| ST4.03ch03 | 54879384..54886641 | PGSC0003DMG400024625 | MADS box protein                                   |
| ST4.03ch03 | 54896515..54901975 | PGSC0003DMG400024626 | MADS-box protein 1                                 |
| ST4.03ch03 | 54926596..54932614 | PGSC0003DMG400024527 | LIGULELESS1 protein                                |
| ST4.03ch03 | 54934288..54936181 | PGSC0003DMG400024627 | GRP 2                                              |
| ST4.03ch03 | 54941445..54943770 | PGSC0003DMG400024528 | Transposase Tam3                                   |
| ST4.03ch03 | 54954975..54955675 | PGSC0003DMG400024677 | Gene of unknown function                           |
| ST4.03ch03 | 54961544..54963584 | PGSC0003DMG400024530 | Protein COBRA                                      |
| ST4.03ch03 | 54963884..54966403 | PGSC0003DMG400024628 | COBRA 3                                            |
| ST4.03ch03 | 54969629..54970481 | PGSC0003DMG400024678 | Gene of unknown function                           |
| ST4.03ch03 | 54970872..54972801 | PGSC0003DMG400024629 | Pentatricopeptide repeat-containing protein        |
| ST4.03ch03 | 54979843..54986094 | PGSC0003DMG400024531 | Thylakoid lumenal 25.6 kDa protein, chloroplast    |
| ST4.03ch03 | 54992291..54994660 | PGSC0003DMG400024630 | Cytochrome P450                                    |
| ST4.03ch03 | 55020280..55031726 | PGSC0003DMG400024532 | Multidrug resistance protein                       |
| ST4.03ch03 | 55057180..55060002 | PGSC0003DMG400024631 | SP1L                                               |
| ST4.03ch03 | 55066389..55071048 | PGSC0003DMG400024534 | Conserved gene of unknown function                 |
| ST4.03ch03 | 55080279..55086682 | PGSC0003DMG400024535 | Conserved gene of unknown function                 |
| ST4.03ch03 | 55087489..55088223 | PGSC0003DMG400024679 | Calcium ion binding protein                        |
| ST4.03ch03 | 55095032..55097193 | PGSC0003DMG400024632 | Transcription factor                               |
| ST4.03ch03 | 55106449..55107969 | PGSC0003DMG400024633 | Conserved gene of unknown function                 |
| ST4.03ch03 | 55108954..55112010 | PGSC0003DMG400024536 | Mitochondrial import receptor subunit TOM5 homolog |
| ST4.03ch03 | 55112112..55114301 | PGSC0003DMG400024537 | Basic 7S globulin 2 small subunit                  |
| ST4.03ch03 | 55114549..55115862 | PGSC0003DMG400024538 | Basic 7S globulin 2 small subunit                  |
| ST4.03ch03 | 55116413..55120021 | PGSC0003DMG400024634 | 70 kDa subunit of replication protein A            |
| ST4.03ch03 | 55120463..55124847 | PGSC0003DMG400024635 | Conserved gene of unknown function                 |
| ST4.03ch03 | 55126898..55130102 | PGSC0003DMG400024539 | ATEXO70E2                                          |
| ST4.03ch03 | 55132684..55134160 | PGSC0003DMG400024636 | Presenilin                                         |
| ST4.03ch03 | 55137994..55138407 | PGSC0003DMG400036289 | Gene of unknown function                           |
| ST4.03ch03 | 55140671..55145965 | PGSC0003DMG400024637 | Conserved gene of unknown function                 |
| ST4.03ch03 | 55148871..55153448 | PGSC0003DMG400024638 | ATP synthase subunit gamma, mitochondrial          |
| ST4.03ch03 | 55158832..55159875 | PGSC0003DMG400024540 | Heat shock protein                                 |
| ST4.03ch03 | 55167492..55170026 | PGSC0003DMG400024541 | Heat shock protein                                 |
| ST4.03ch03 | 55170152..55172782 | PGSC0003DMG400024639 | Histone deacetylase                                |
| ST4.03ch03 | 55187626..55190646 | PGSC0003DMG400024640 | Zinc ion binding protein                           |
| ST4.03ch03 | 55207465..55207931 | PGSC0003DMG400024542 | Gene of unknown function                           |
| ST4.03ch03 | 55212848..55216845 | PGSC0003DMG400024641 | 24 kDa seed maturation protein                     |
| ST4.03ch03 | 55220548..55224682 | PGSC0003DMG400024642 | Glucan endo-1, 3-beta-glucosidase 3                |
| ST4.03ch03 | 55232191..55236265 | PGSC0003DMG400024643 | Flavonoid 3'-monooxygenase                         |
| ST4.03ch03 | 55248140..55252302 | PGSC0003DMG400024644 | 101 kDa heat shock protein                         |
| ST4.03ch03 | 55254760..55255117 | PGSC0003DMG400024645 | Gene of unknown function                           |

|            |                    |                      |                                                                                                                 |
|------------|--------------------|----------------------|-----------------------------------------------------------------------------------------------------------------|
| ST4.03ch03 | 55279369..55282340 | PGSC0003DMG400024543 | Protein tyrosine phosphatase                                                                                    |
| ST4.03ch03 | 55316389..55316718 | PGSC0003DMG400024646 | Expansin                                                                                                        |
| ST4.03ch03 | 55320358..55324943 | PGSC0003DMG400024647 | Expansin                                                                                                        |
| ST4.03ch03 | 55329575..55332586 | PGSC0003DMG400024545 | Gene of unknown function                                                                                        |
| ST4.03ch03 | 55333818..55338034 | PGSC0003DMG400024648 | Expansin                                                                                                        |
| ST4.03ch03 | 55343022..55344967 | PGSC0003DMG400024546 | 40S ribosomal protein S19                                                                                       |
| ST4.03ch03 | 55347770..55354797 | PGSC0003DMG400024547 | Diacylglycerol kinase, theta                                                                                    |
| ST4.03ch03 | 55351518..55352296 | PGSC0003DMG400024682 | Gene of unknown function                                                                                        |
| ST4.03ch03 | 55359886..55361328 | PGSC0003DMG400036966 | UDP-glucose 6-dehydrogenase                                                                                     |
| ST4.03ch03 | 55361783..55381426 | PGSC0003DMG402024649 | EMB2733/ESP3 (EMBRYO DEFECTIVE 2733)                                                                            |
| ST4.03ch03 | 55379182..55379793 | PGSC0003DMG401024649 | EMB2733/ESP3 (EMBRYO DEFECTIVE 2733)                                                                            |
| ST4.03ch03 | 55384580..55386047 | PGSC0003DMG400024650 | Ubiquitin-protein ligase                                                                                        |
| ST4.03ch03 | 55387412..55388225 | PGSC0003DMG400024684 | Gene of unknown function                                                                                        |
| ST4.03ch03 | 55397524..55398549 | PGSC0003DMG400024651 | Ubiquitin-protein ligase                                                                                        |
| ST4.03ch03 | 55408732..55414637 | PGSC0003DMG401024548 | Leucine-rich repeat containing protein                                                                          |
| ST4.03ch03 | 55413716..55414630 | PGSC0003DMG402024548 | Gene of unknown function                                                                                        |
| ST4.03ch03 | 55415653..55419423 | PGSC0003DMG401024549 | ATP binding protein                                                                                             |
| ST4.03ch03 | 55421643..55425464 | PGSC0003DMG402024549 | ATP binding protein                                                                                             |
| ST4.03ch03 | 55433276..55435278 | PGSC0003DMG400024550 | ZPT4-3                                                                                                          |
| ST4.03ch03 | 55439454..55441424 | PGSC0003DMG400024551 | Conserved gene of unknown function                                                                              |
| ST4.03ch03 | 55443299..55443883 | PGSC0003DMG400024652 | RING-H2 finger protein ATL1M                                                                                    |
| ST4.03ch03 | 55445620..55449745 | PGSC0003DMG400024552 | Synaptosomal associated protein                                                                                 |
| ST4.03ch03 | 55451344..55451992 | PGSC0003DMG400024653 | Catalytic/ oxidoreductase, acting on NADH or NADPH                                                              |
| ST4.03ch03 | 55453167..55454136 | PGSC0003DMG401024654 | Heparanase 1                                                                                                    |
| ST4.03ch03 | 55453167..55458448 | PGSC0003DMG402024654 | Heparanase-2                                                                                                    |
| ST4.03ch03 | 55462578..55470574 | PGSC0003DMG400024553 | Conserved gene of unknown function                                                                              |
| ST4.03ch03 | 55474349..55475978 | PGSC0003DMG400024655 | SNF2 domain-containing protein / helicase domain-containing protein /<br>endonuclease domain-containing protein |
| ST4.03ch03 | 55495567..55498080 | PGSC0003DMG400024554 | DNA binding protein                                                                                             |
| ST4.03ch03 | 55503952..55508294 | PGSC0003DMG400024656 | Conserved gene of unknown function                                                                              |
| ST4.03ch03 | 55513446..55517088 | PGSC0003DMG400024556 | Dimethylaniline monooxygenase                                                                                   |
| ST4.03ch03 | 55517808..55520194 | PGSC0003DMG400024657 | Pentatricopeptide repeat-containing protein                                                                     |
| ST4.03ch03 | 55520373..55524372 | PGSC0003DMG400024658 | Excision repair cross-complementing 1 ercc1                                                                     |
| ST4.03ch03 | 55524895..55529535 | PGSC0003DMG400024659 | Conserved gene of unknown function                                                                              |
| ST4.03ch03 | 55540500..55542597 | PGSC0003DMG400024660 | HCG23534, partial                                                                                               |
| ST4.03ch03 | 55544743..55548544 | PGSC0003DMG400024661 | Brassinosteroid LRR receptor kinase                                                                             |
| ST4.03ch03 | 55559293..55561461 | PGSC0003DMG400024662 | Myosin heavy chain                                                                                              |
| ST4.03ch03 | 55564054..55569528 | PGSC0003DMG401024557 | Carbamoyl phosphate synthase small subunit                                                                      |
| ST4.03ch03 | 55570479..55572685 | PGSC0003DMG402024557 | Conserved gene of unknown function                                                                              |
| ST4.03ch03 | 55575040..55577312 | PGSC0003DMG400024558 | Eukaryotic translation initiation factor 5A-5                                                                   |
| ST4.03ch03 | 55596037..55603079 | PGSC0003DMG400024559 | ATP binding protein                                                                                             |
| ST4.03ch03 | 55615061..55624395 | PGSC0003DMG400024560 | Formin 20                                                                                                       |
| ST4.03ch03 | 55627919..55628320 | PGSC0003DMG400041803 | Gene of unknown function                                                                                        |
| ST4.03ch03 | 55631876..55633324 | PGSC0003DMG400024664 | Conserved gene of unknown function                                                                              |

HNH

|            |                    |                      |                                                     |
|------------|--------------------|----------------------|-----------------------------------------------------|
| ST4.03ch03 | 55641081..55645781 | PGSC0003DMG400024561 | Ser/Thr protein kinase                              |
| ST4.03ch03 | 55646289..55648550 | PGSC0003DMG400024665 | Kinase                                              |
| ST4.03ch03 | 55666624..55668451 | PGSC0003DMG400024562 | Conserved gene of unknown function                  |
| ST4.03ch03 | 55668600..55672390 | PGSC0003DMG400024667 | Glycosyltransferase                                 |
| ST4.03ch03 | 55730618..55734374 | PGSC0003DMG400019502 | Vesicle transport v-SNARE 11                        |
| ST4.03ch03 | 55734633..55741670 | PGSC0003DMG400019518 | Pseudo response regulator                           |
| ST4.03ch03 | 55745709..55749972 | PGSC0003DMG400019519 | Exonuclease                                         |
| ST4.03ch03 | 55750123..55752218 | PGSC0003DMG400019520 | Conserved gene of unknown function                  |
| ST4.03ch03 | 55752344..55753969 | PGSC0003DMG400019503 | Pentatricopeptide repeat-containing protein         |
| ST4.03ch03 | 55765639..55771810 | PGSC0003DMG400019504 | Sand family protein                                 |
| ST4.03ch03 | 55775640..55782005 | PGSC0003DMG400019521 | Ribulose-phosphate 3-epimerase, chloroplastic       |
| ST4.03ch03 | 55783142..55785146 | PGSC0003DMG400019505 | Alpha-1, 2-fucosyltransferase                       |
| ST4.03ch03 | 55785591..55789344 | PGSC0003DMG400019522 | Heat shock protein binding protein                  |
| ST4.03ch03 | 55815778..55817714 | PGSC0003DMG400019523 | NAC domain-containing protein 21/22                 |
| ST4.03ch03 | 55826686..55830767 | PGSC0003DMG400019524 | YGL010w                                             |
| ST4.03ch03 | 55841662..55843149 | PGSC0003DMG400019506 | Thioredoxin II                                      |
| ST4.03ch03 | 55854740..55856726 | PGSC0003DMG400019507 | Expansin                                            |
| ST4.03ch03 | 55862891..55864115 | PGSC0003DMG400019508 | Chlorophyll a/b binding protein                     |
| ST4.03ch03 | 55865548..55867778 | PGSC0003DMG400019525 | MADS-box family protein                             |
| ST4.03ch03 | 55869333..55870654 | PGSC0003DMG400019526 | Zinc finger protein                                 |
| ST4.03ch03 | 55872209..55873150 | PGSC0003DMG400019527 | Calcium ion binding protein                         |
| ST4.03ch03 | 55882564..55885296 | PGSC0003DMG400019528 | Dof zinc finger protein                             |
| ST4.03ch03 | 55899892..55900645 | PGSC0003DMG400019509 | Conserved gene of unknown function                  |
| ST4.03ch03 | 55901911..55903596 | PGSC0003DMG400019529 | Zinc finger protein                                 |
| ST4.03ch03 | 55904950..55906678 | PGSC0003DMG400019510 | Geranylgeranyl diphosphate reductase, chloroplastic |
| ST4.03ch03 | 55907758..55912183 | PGSC0003DMG400019511 | NAD-malate dehydrogenase                            |
| ST4.03ch03 | 55912895..55913779 | PGSC0003DMG400019530 | Pentatricopeptide repeat-containing protein         |
| ST4.03ch03 | 55919907..55921627 | PGSC0003DMG400019531 | EMB514                                              |
| ST4.03ch03 | 55924195..55930016 | PGSC0003DMG400019512 | Membrane associated ring finger 1, 8                |
| ST4.03ch03 | 55930637..55935866 | PGSC0003DMG400019532 | Conserved gene of unknown function                  |
| ST4.03ch03 | 55943853..55944385 | PGSC0003DMG402019533 | Gasa4                                               |
| ST4.03ch03 | 55943853..55945734 | PGSC0003DMG401019533 | Gip1                                                |
| ST4.03ch03 | 55959016..55959501 | PGSC0003DMG400019534 | Transcription factor                                |
| ST4.03ch03 | 55984819..55986615 | PGSC0003DMG400019535 | MYB domain class transcription factor               |
| ST4.03ch03 | 55998988..56003542 | PGSC0003DMG400019536 | Conserved gene of unknown function                  |
| ST4.03ch03 | 56004967..56005756 | PGSC0003DMG400019540 | Glutathione s-transferase                           |
| ST4.03ch03 | 56013960..56015078 | PGSC0003DMG400019537 | Glutathione s-transferase                           |
| ST4.03ch03 | 56016933..56022364 | PGSC0003DMG400019513 | Activating signal cointegrator                      |
| ST4.03ch03 | 56022713..56032180 | PGSC0003DMG400019514 | ATP binding protein                                 |
| ST4.03ch03 | 56036627..56043628 | PGSC0003DMG400019515 | SET protein, phosphatase 2A inhibitor               |
| ST4.03ch03 | 56045150..56046685 | PGSC0003DMG400019516 | Chitin-binding lectin                               |
| ST4.03ch03 | 56065422..56065940 | PGSC0003DMG400019517 | Chitin-binding lectin 1                             |
| ST4.03ch03 | 56080206..56081282 | PGSC0003DMG400019538 | 42kDa chitin-binding protein                        |
| ST4.03ch03 | 56101471..56102139 | PGSC0003DMG400019539 | 42kDa chitin-binding protein                        |

|            |                    |                      |                                                               |
|------------|--------------------|----------------------|---------------------------------------------------------------|
| ST4.03ch03 | 56182447..56183119 | PGSC0003DMG400032524 | Chitin-binding lectin 1                                       |
| ST4.03ch03 | 56197017..56197678 | PGSC0003DMG400032527 | Chitin-binding lectin 1                                       |
| ST4.03ch03 | 56282743..56283138 | PGSC0003DMG400000645 | 42kDa chitin-binding protein                                  |
| ST4.03ch03 | 56323681..56324169 | PGSC0003DMG400000593 | Flavonol synthase/flavanone 3-hydroxylase                     |
| ST4.03ch03 | 56325941..56329622 | PGSC0003DMG401000594 | Flavonol synthase/flavanone 3-hydroxylase                     |
| ST4.03ch03 | 56330296..56339009 | PGSC0003DMG404000594 | Flavonol synthase/flavanone 3-hydroxylase                     |
| ST4.03ch03 | 56335439..56336637 | PGSC0003DMG400000595 | Flavonol synthase/flavanone 3-hydroxylase                     |
| ST4.03ch03 | 56339468..56340945 | PGSC0003DMG402000594 | Flavonol synthase/flavanone 3-hydroxylase                     |
| ST4.03ch03 | 56342571..56343429 | PGSC0003DMG403000594 | Flavonol synthase/flavanone 3-hydroxylase                     |
| ST4.03ch03 | 56343918..56345959 | PGSC0003DMG400000596 | Flavonol synthase/flavanone 3-hydroxylase                     |
| ST4.03ch03 | 56360237..56362098 | PGSC0003DMG400000597 | Transcription factor                                          |
| ST4.03ch03 | 56373271..56379378 | PGSC0003DMG400000598 | Conserved gene of unknown function                            |
| ST4.03ch03 | 56379966..56383979 | PGSC0003DMG400000599 | DNA-binding protein                                           |
| ST4.03ch03 | 56388027..56390843 | PGSC0003DMG400000600 | Protein HVA22                                                 |
| ST4.03ch03 | 56396018..56403865 | PGSC0003DMG400000601 | ZR1 protein                                                   |
| ST4.03ch03 | 56404492..56409141 | PGSC0003DMG400000627 | AtEB1b                                                        |
| ST4.03ch03 | 56412282..56419831 | PGSC0003DMG400000602 | Conserved gene of unknown function                            |
| ST4.03ch03 | 56420226..56421126 | PGSC0003DMG400000628 | Late embryogenesis abundant protein                           |
| ST4.03ch03 | 56421696..56422663 | PGSC0003DMG400000603 | Conserved gene of unknown function                            |
| ST4.03ch03 | 56426550..56428641 | PGSC0003DMG400000604 | Zinc finger (CCCH-type) family protein                        |
| ST4.03ch03 | 56430657..56432021 | PGSC0003DMG400038576 | Conserved gene of unknown function                            |
| ST4.03ch03 | 56433707..56436222 | PGSC0003DMG400000605 | DNA binding protein                                           |
| ST4.03ch03 | 56436555..56437339 | PGSC0003DMG402000629 | Stigma-specific protein Stig1                                 |
| ST4.03ch03 | 56436747..56437316 | PGSC0003DMG401000629 | Stigma-specific protein Stig1                                 |
| ST4.03ch03 | 56437399..56442899 | PGSC0003DMG402000630 | Racemase and epimerase, acting on amino acids and derivatives |
| ST4.03ch03 | 56441852..56442933 | PGSC0003DMG401000630 | Conserved gene of unknown function                            |
| ST4.03ch03 | 56445081..56446592 | PGSC0003DMG400000606 | Ubiquitin-protein ligase                                      |
| ST4.03ch03 | 56453876..56454894 | PGSC0003DMG400000607 | Conserved gene of unknown function                            |
| ST4.03ch03 | 56461474..56466007 | PGSC0003DMG400000608 | Polygalacturonase                                             |
| ST4.03ch03 | 56476942..56478370 | PGSC0003DMG400000631 | Lactoylglutathione lyase                                      |
| ST4.03ch03 | 56487086..56490055 | PGSC0003DMG400000611 | Pentatricopeptide repeat-containing protein                   |
| ST4.03ch03 | 56490832..56494056 | PGSC0003DMG400000612 | AP2 domain-containing protein AP29                            |
| ST4.03ch03 | 56494225..56498356 | PGSC0003DMG400000632 | Pentatricopeptide repeat-containing protein                   |
| ST4.03ch03 | 56499164..56501938 | PGSC0003DMG400000613 | Nucleic acid binding protein                                  |
| ST4.03ch03 | 56502402..56502712 | PGSC0003DMG400000633 | Glycoside hydrolase, family 28                                |
| ST4.03ch03 | 56506793..56508408 | PGSC0003DMG400000634 | CAPIP2                                                        |
| ST4.03ch03 | 56508806..56513240 | PGSC0003DMG400000635 | Longin                                                        |
| ST4.03ch03 | 56522242..56522732 | PGSC0003DMG400000646 | RNase H family protein                                        |
| ST4.03ch03 | 56522932..56524108 | PGSC0003DMG400000636 | AP2 transcription factor                                      |
| ST4.03ch03 | 56535683..56540302 | PGSC0003DMG400000614 | Phospholipase PLDa1                                           |
| ST4.03ch03 | 56543497..56544650 | PGSC0003DMG400000615 | Conserved gene of unknown function                            |
| ST4.03ch03 | 56548515..56554248 | PGSC0003DMG400000616 | Conserved gene of unknown function                            |
| ST4.03ch03 | 56558525..56562589 | PGSC0003DMG401000617 | Conserved gene of unknown function                            |
| ST4.03ch03 | 56561181..56562589 | PGSC0003DMG402000617 | Gene of unknown function                                      |

|            |                    |                      |                                              |
|------------|--------------------|----------------------|----------------------------------------------|
| ST4.03ch03 | 56568452..56570701 | PGSC0003DMG400000618 | Conserved gene of unknown function           |
| ST4.03ch03 | 56571862..56574223 | PGSC0003DMG400000619 | Nucleosome-binding protein                   |
| ST4.03ch03 | 56574769..56575915 | PGSC0003DMG400000620 | Stellacyanin CASLP1                          |
| ST4.03ch03 | 56577846..56578716 | PGSC0003DMG400000621 | NtEIG-A1 protein                             |
| ST4.03ch03 | 56586492..56587506 | PGSC0003DMG400000637 | GTP binding protein                          |
| ST4.03ch03 | 56593561..56594955 | PGSC0003DMG400000638 | Histidine-containing phosphotransfer protein |
| ST4.03ch03 | 56602125..56605038 | PGSC0003DMG400000639 | Delta 9 desaturase                           |
| ST4.03ch03 | 56613085..56615641 | PGSC0003DMG400000640 | Conserved gene of unknown function           |
| ST4.03ch03 | 56635358..56640706 | PGSC0003DMG400000642 | ATP binding protein                          |
| ST4.03ch03 | 56647451..56648584 | PGSC0003DMG400000622 | Conserved gene of unknown function           |
| ST4.03ch03 | 56649989..56653346 | PGSC0003DMG400000623 | Conserved gene of unknown function           |
| ST4.03ch03 | 56665415..56666306 | PGSC0003DMG400000643 | Conserved gene of unknown function           |
| ST4.03ch03 | 56666693..56672595 | PGSC0003DMG400000625 | Signal recognition particle 54 kDa protein 1 |
| ST4.03ch03 | 56672676..56681324 | PGSC0003DMG400000644 | Phox domain-containing protein               |
| ST4.03ch03 | 56738617..56742872 | PGSC0003DMG400019816 | Conserved gene of unknown function           |
| ST4.03ch03 | 56743356..56745821 | PGSC0003DMG400019817 | Pentatricopeptide repeat-containing protein  |
| ST4.03ch03 | 56745855..56746399 | PGSC0003DMG400019818 | Conserved gene of unknown function           |
| ST4.03ch03 | 56746680..56752798 | PGSC0003DMG400019821 | Cyclic nucleotide-gated ion channel          |
| ST4.03ch03 | 56755917..56757865 | PGSC0003DMG400019822 | N-acetyltransferase                          |
| ST4.03ch03 | 56764519..56767403 | PGSC0003DMG400019823 | Conserved gene of unknown function           |
| ST4.03ch03 | 56769711..56776369 | PGSC0003DMG400019819 | DNA-3-methyladenine glycosylase              |
| ST4.03ch03 | 56777004..56780104 | PGSC0003DMG400019824 | JA-induced WRKY protein                      |
| ST4.03ch03 | 56814215..56816945 | PGSC0003DMG400019825 | Cinnamoyl CoA reductase                      |
| ST4.03ch03 | 56823535..56833474 | PGSC0003DMG401019826 | Nucleic acid binding protein                 |
| ST4.03ch03 | 56833367..56833831 | PGSC0003DMG402019826 | Gene of unknown function                     |
| ST4.03ch03 | 56839370..56843865 | PGSC0003DMG400019827 | Nucleic acid binding protein                 |
| ST4.03ch03 | 56848518..56849783 | PGSC0003DMG400019828 | Conserved gene of unknown function           |
| ST4.03ch03 | 56862676..56870271 | PGSC0003DMG400019829 | Nucleic acid binding protein                 |
| ST4.03ch03 | 56877725..56879270 | PGSC0003DMG400019830 | Conserved gene of unknown function           |
| ST4.03ch03 | 56881487..56883357 | PGSC0003DMG400019831 | Gene of unknown function                     |
| ST4.03ch03 | 56886710..56887250 | PGSC0003DMG400019832 | Transport protein                            |
| ST4.03ch03 | 56892955..56894017 | PGSC0003DMG400014119 | SFT2 domain containing 2                     |
| ST4.03ch03 | 56920573..56925568 | PGSC0003DMG400014120 | Stromal cell-derived factor 2                |
| ST4.03ch03 | 56926874..56928354 | PGSC0003DMG400014121 | Ccr4-associated factor                       |
| ST4.03ch03 | 56931977..56937779 | PGSC0003DMG402014189 | XH/XS domain-containing protein              |
| ST4.03ch03 | 56944480..56947012 | PGSC0003DMG401014189 | Conserved gene of unknown function           |
| ST4.03ch03 | 56950476..56950820 | PGSC0003DMG400014122 | Conserved gene of unknown function           |
| ST4.03ch03 | 56959060..56962258 | PGSC0003DMG400014123 | Aquaporin, MIP family, NIP subfamily         |
| ST4.03ch03 | 56961255..56963431 | PGSC0003DMG400014190 | Conserved gene of unknown function           |
| ST4.03ch03 | 56963696..56967940 | PGSC0003DMG400014191 | 60S ribosomal protein L7                     |
| ST4.03ch03 | 56983543..56984571 | PGSC0003DMG400014124 | Zinc finger protein                          |
| ST4.03ch03 | 56988976..56991846 | PGSC0003DMG400014192 | Mitochondrial glycoprotein family protein    |
| ST4.03ch03 | 56992178..56998247 | PGSC0003DMG400014193 | Conserved gene of unknown function           |
| ST4.03ch03 | 57001818..57003706 | PGSC0003DMG400014125 | Conserved gene of unknown function           |

|            |                    |                      |                                         |
|------------|--------------------|----------------------|-----------------------------------------|
| ST4.03ch03 | 57004942..57008028 | PGSC0003DMG400014126 | Conserved gene of unknown function      |
| ST4.03ch03 | 57019240..57025146 | PGSC0003DMG400014194 | Defective in cullin neddylation protein |
| ST4.03ch03 | 57026302..57034757 | PGSC0003DMG400014195 | Nucleoporin                             |
| ST4.03ch03 | 57039987..57041187 | PGSC0003DMG400014196 | Ethylene response factor                |
| ST4.03ch03 | 57042084..57043284 | PGSC0003DMG400014127 | DNA binding protein                     |
| ST4.03ch03 | 57050846..57054023 | PGSC0003DMG400014128 | Plasma membrane proton ATPase           |
| ST4.03ch03 | 57054280..57061338 | PGSC0003DMG403014197 | Serine/threonine-protein kinase PBS1    |
| ST4.03ch03 | 57055529..57056170 | PGSC0003DMG402014197 | Conserved gene of unknown function      |
| ST4.03ch03 | 57057636..57060917 | PGSC0003DMG401014197 | Serine/threonine-protein kinase PBS1    |
| ST4.03ch03 | 57066724..57068528 | PGSC0003DMG400014129 | Vegetative cell wall protein gp1        |
| ST4.03ch03 | 57074634..57076797 | PGSC0003DMG400014130 | F-box/LRR-repeat protein                |
| ST4.03ch03 | 57078465..57081047 | PGSC0003DMG400014131 | Leucine-rich repeat family protein      |
| ST4.03ch03 | 57078465..57084441 | PGSC0003DMG400014198 | Conserved gene of unknown function      |
| ST4.03ch03 | 57110681..57112638 | PGSC0003DMG400014199 | Nodulin                                 |
| ST4.03ch03 | 57113395..57115435 | PGSC0003DMG400014200 | Flotillin-1                             |
| ST4.03ch03 | 57117491..57118750 | PGSC0003DMG400014132 | Conserved gene of unknown function      |
| ST4.03ch03 | 57123593..57125091 | PGSC0003DMG400014133 | F-box family protein                    |
| ST4.03ch03 | 57134091..57138611 | PGSC0003DMG400014134 | Conserved gene of unknown function      |
| ST4.03ch03 | 57155346..57155951 | PGSC0003DMG400046334 | Conserved gene of unknown function      |
| ST4.03ch03 | 57159221..57164698 | PGSC0003DMG400014135 | Nodulin                                 |
| ST4.03ch03 | 57164954..57166123 | PGSC0003DMG400014201 | Jp18                                    |
| ST4.03ch03 | 57166577..57170997 | PGSC0003DMG400014202 | 50S ribosomal protein L3                |
| ST4.03ch03 | 57171533..57179260 | PGSC0003DMG400014136 | Prolyl-tRNA synthetase                  |
| ST4.03ch03 | 57178648..57179211 | PGSC0003DMG400034349 | Jp18                                    |
| ST4.03ch03 | 57184598..57186764 | PGSC0003DMG400014203 | Amino acid transporter                  |
| ST4.03ch03 | 57191604..57192393 | PGSC0003DMG400014204 | Transcription factor TSRF1              |
| ST4.03ch03 | 57209218..57211637 | PGSC0003DMG400014137 | Protein TOPLESS                         |
| ST4.03ch03 | 57212055..57221082 | PGSC0003DMG401014138 | WD-repeat protein                       |
| ST4.03ch03 | 57222159..57229453 | PGSC0003DMG402014138 | WD-repeat protein                       |
| ST4.03ch03 | 57232401..57241608 | PGSC0003DMG401014139 | WD-repeat protein                       |
| ST4.03ch03 | 57237010..57238131 | PGSC0003DMG402014139 | Beta transducin                         |
| ST4.03ch03 | 57239271..57241608 | PGSC0003DMG403014139 | WD-repeat protein                       |
| ST4.03ch03 | 57270931..57278996 | PGSC0003DMG400014140 | Prli-interacting factor I               |
| ST4.03ch03 | 57279271..57282389 | PGSC0003DMG400014141 | DEAD-box protein abstrakt               |
| ST4.03ch03 | 57283003..57283575 | PGSC0003DMG400014142 | Allergen Pru p 1.06B                    |
| ST4.03ch03 | 57285513..57286258 | PGSC0003DMG400014143 | Major allergen Pru ar                   |
| ST4.03ch03 | 57286634..57287334 | PGSC0003DMG400014206 | Conserved gene of unknown function      |
| ST4.03ch03 | 57287784..57292017 | PGSC0003DMG400014207 | Calcineurin                             |
| ST4.03ch03 | 57293005..57297878 | PGSC0003DMG400014208 | Inorganic pyrophosphatase               |
| ST4.03ch03 | 57309534..57312556 | PGSC0003DMG400014144 | Glycerol kinase                         |

**Table S4:** Overview about the different mutation types and locations present in the genes under the DRYM QTL on LG3 (A)

| ID                   | Name                                               | synonymous | missense | downstream | upstream | intron | splice | stop | start | initiator | 3'UTR | 5'UTR | Summe |
|----------------------|----------------------------------------------------|------------|----------|------------|----------|--------|--------|------|-------|-----------|-------|-------|-------|
| PGSC0003DMG401015193 | Malate synthase                                    | 1          | 0        | 0          | 0        | 0      | 0      | 0    | 0     | 0         | 0     | 0     | 1     |
| PGSC0003DMG400024516 | Conserved gene of unknown function                 | 0          | 1        | 0          | 0        | 0      | 0      | 0    | 0     | 0         | 0     | 0     | 1     |
| PGSC0003DMG400019540 | Glutathione s-transferase                          | 0          | 0        | 0          | 0        | 0      | 0      | 0    | 0     | 0         | 0     | 1     | 1     |
| PGSC0003DMG402019826 | Gene of unknown function                           | 0          | 1        | 0          | 0        | 0      | 0      | 0    | 0     | 0         | 0     | 0     | 1     |
| PGSC0003DMG400000633 | Glycoside hydrolase, family 28                     | 0          | 0        | 0          | 0        | 0      | 0      | 0    | 0     | 0         | 1     | 0     | 1     |
| PGSC0003DMG400018093 | Fasciclin-like arabinogalactan protein 9           | 0          | 1        | 0          | 0        | 0      | 0      | 0    | 0     | 0         | 0     | 0     | 1     |
| PGSC0003DMG400015258 | DNA-directed RNA polymerase                        | 1          | 0        | 0          | 0        | 0      | 0      | 0    | 0     | 0         | 0     | 0     | 1     |
| PGSC0003DMG400019832 | Transport protein                                  | 0          | 0        | 0          | 0        | 0      | 0      | 0    | 0     | 0         | 1     | 0     | 1     |
| PGSC0003DMG400024583 | Conserved gene of unknown function                 | 0          | 1        | 0          | 0        | 0      | 0      | 0    | 0     | 0         | 0     | 0     | 1     |
| PGSC0003DMG400025636 | Receptor kinase                                    | 1          | 0        | 0          | 0        | 0      | 0      | 0    | 0     | 0         | 0     | 0     | 1     |
| PGSC0003DMG400026498 | Gene of unknown function                           | 0          | 1        | 0          | 0        | 0      | 0      | 0    | 0     | 0         | 0     | 0     | 1     |
| PGSC0003DMG400015294 | Gene of unknown function                           | 0          | 0        | 0          | 0        | 0      | 0      | 0    | 0     | 0         | 1     | 0     | 1     |
| PGSC0003DMG400046943 | NAC transcription factor                           | 1          | 0        | 0          | 0        | 0      | 0      | 0    | 0     | 0         | 0     | 0     | 1     |
| PGSC0003DMG402024548 | Gene of unknown function                           | 0          | 0        | 0          | 0        | 0      | 0      | 0    | 0     | 0         | 0     | 1     | 1     |
| PGSC0003DMG400024668 | Gene of unknown function                           | 0          | 0        | 0          | 0        | 0      | 0      | 0    | 0     | 0         | 0     | 1     | 1     |
| PGSC0003DMG400024651 | Ubiquitin-protein ligase                           | 0          | 1        | 0          | 0        | 0      | 0      | 0    | 0     | 0         | 0     | 0     | 1     |
| PGSC0003DMG401015259 | Gene of unknown function                           | 0          | 0        | 0          | 0        | 0      | 0      | 0    | 0     | 0         | 1     | 0     | 1     |
| PGSC0003DMG400019509 | Conserved gene of unknown function                 | 0          | 0        | 0          | 0        | 0      | 0      | 0    | 0     | 0         | 1     | 0     | 1     |
| PGSC0003DMG400004345 | Gene of unknown function                           | 0          | 0        | 0          | 0        | 0      | 0      | 0    | 0     | 0         | 1     | 0     | 1     |
| PGSC0003DMG402004331 | Conserved gene of unknown function                 | 0          | 1        | 0          | 0        | 0      | 0      | 0    | 0     | 0         | 0     | 0     | 1     |
| PGSC0003DMG400010135 | Ethylene-responsive element-binding family protein | 0          | 1        | 0          | 0        | 0      | 0      | 0    | 0     | 0         | 0     | 0     | 1     |
| PGSC0003DMG400019529 | Zinc finger protein                                | 1          | 0        | 0          | 0        | 0      | 0      | 0    | 0     | 0         | 0     | 0     | 1     |
| PGSC0003DMG400031060 | Gene of unknown function                           | 0          | 0        | 0          | 0        | 0      | 0      | 0    | 0     | 0         | 1     | 0     | 1     |
| PGSC0003DMG401018159 | Conserved gene of unknown function                 | 0          | 0        | 0          | 0        | 0      | 0      | 0    | 0     | 0         | 1     | 0     | 1     |
| PGSC0003DMG400034620 | Pectinesterase inhibitor                           | 0          | 1        | 0          | 0        | 0      | 0      | 0    | 0     | 0         | 0     | 0     | 1     |
| PGSC0003DMG400031059 | Conserved gene of unknown function                 | 0          | 0        | 0          | 0        | 1      | 0      | 0    | 0     | 0         | 0     | 0     | 1     |
| PGSC0003DMG400018199 | Cytochrome P450 71A4                               | 1          | 0        | 0          | 0        | 0      | 0      | 0    | 0     | 0         | 0     | 0     | 1     |
| PGSC0003DMG400034349 | Jp18                                               | 0          | 1        | 0          | 0        | 0      | 0      | 0    | 0     | 0         | 0     | 0     | 1     |
| PGSC0003DMG400025347 | ABR064Wp                                           | 1          | 0        | 0          | 0        | 0      | 0      | 0    | 0     | 0         | 0     | 1     | 2     |
| PGSC0003DMG400018197 | Cytochrome P450 71A4                               | 0          | 2        | 0          | 0        | 0      | 0      | 0    | 0     | 0         | 0     | 0     | 2     |
| PGSC0003DMG400015302 | Conserved gene of unknown function                 | 2          | 0        | 0          | 0        | 0      | 0      | 0    | 0     | 0         | 0     | 0     | 2     |
| PGSC0003DMG400019526 | Zinc finger protein                                | 1          | 1        | 0          | 0        | 0      | 0      | 0    | 0     | 0         | 0     | 0     | 2     |
| PGSC0003DMG400018121 | Conserved gene of unknown function                 | 0          | 0        | 0          | 0        | 0      | 0      | 0    | 0     | 0         | 2     | 0     | 2     |
| PGSC0003DMG400024468 | B12D protein                                       | 0          | 0        | 2          | 0        | 0      | 0      | 0    | 0     | 0         | 0     | 0     | 2     |
| PGSC0003DMG400015289 | Proteinase inhibitor type-2 CEVI57                 | 1          | 0        | 0          | 0        | 0      | 0      | 1    | 0     | 0         | 0     | 0     | 2     |
| PGSC0003DMG400015214 | Conserved gene of unknown function                 | 1          | 0        | 0          | 0        | 0      | 0      | 0    | 0     | 0         | 1     | 0     | 2     |
| PGSC0003DMG402019533 | Gasa4                                              | 1          | 0        | 0          | 0        | 0      | 0      | 0    | 0     | 0         | 0     | 1     | 2     |
| PGSC0003DMG400018145 | Enzyme inhibitor                                   | 1          | 1        | 0          | 0        | 0      | 0      | 0    | 0     | 0         | 0     | 0     | 2     |
| PGSC0003DMG400018188 | Ubiquitin-protein ligase                           | 1          | 1        | 0          | 0        | 0      | 0      | 0    | 0     | 0         | 0     | 0     | 2     |
| PGSC0003DMG402031045 | Argonaute 1                                        | 0          | 1        | 0          | 0        | 0      | 0      | 0    | 0     | 0         | 0     | 1     | 2     |
| PGSC0003DMG400024616 | UDP-glucosyltransferase                            | 1          | 1        | 0          | 0        | 0      | 0      | 0    | 0     | 0         | 0     | 0     | 2     |
| PGSC0003DMG400025333 | Short chain alcohol dehydrogenase                  | 0          | 0        | 0          | 0        | 0      | 0      | 0    | 0     | 0         | 2     | 0     | 2     |



[illegible]

|                      |                                                            |   |   |   |   |   |   |   |   |   |   |   |   |
|----------------------|------------------------------------------------------------|---|---|---|---|---|---|---|---|---|---|---|---|
| PGSC0003DMG400024671 | Gene of unknown function                                   | 0 | 1 | 0 | 0 | 0 | 0 | 0 | 0 | 0 | 1 | 2 | 4 |
| PGSC0003DMG400015204 | Conserved gene of unknown function                         | 0 | 0 | 0 | 0 | 0 | 0 | 0 | 0 | 0 | 4 | 0 | 4 |
| PGSC0003DMG400045663 | NAC transcription factor                                   | 0 | 4 | 0 | 0 | 0 | 0 | 0 | 0 | 0 | 0 | 0 | 4 |
| PGSC0003DMG400040957 | Pectinesterase inhibitor                                   | 0 | 4 | 0 | 0 | 0 | 0 | 0 | 0 | 0 | 0 | 0 | 4 |
| PGSC0003DMG402015193 | Malate synthase, glyoxysomal                               | 3 | 1 | 0 | 0 | 0 | 0 | 0 | 0 | 0 | 0 | 0 | 4 |
| PGSC0003DMG400010136 | Stigma expressed protein                                   | 2 | 2 | 0 | 0 | 0 | 0 | 0 | 0 | 0 | 0 | 0 | 4 |
| PGSC0003DMG400015301 | Conserved gene of unknown function                         | 0 | 0 | 0 | 0 | 0 | 0 | 0 | 0 | 0 | 4 | 0 | 4 |
| PGSC0003DMG400024679 | Calcium ion binding protein                                | 0 | 1 | 0 | 0 | 0 | 0 | 1 | 0 | 0 | 2 | 0 | 4 |
| PGSC0003DMG400024665 | Kinase                                                     | 3 | 1 | 0 | 0 | 0 | 0 | 0 | 0 | 0 | 0 | 0 | 4 |
| PGSC0003DMG400039762 | Proteinase inhibitor type-2 CEVI57                         | 0 | 4 | 0 | 0 | 0 | 0 | 0 | 0 | 0 | 0 | 0 | 4 |
| PGSC0003DMG400018176 | Oleosin                                                    | 1 | 2 | 0 | 0 | 0 | 0 | 0 | 0 | 0 | 0 | 1 | 4 |
| PGSC0003DMG400010131 | Nb cell deth marker                                        | 3 | 1 | 0 | 0 | 0 | 0 | 0 | 0 | 0 | 0 | 0 | 4 |
| PGSC0003DMG401024610 | Conserved gene of unknown function                         | 1 | 3 | 0 | 0 | 0 | 0 | 0 | 0 | 0 | 0 | 0 | 4 |
| PGSC0003DMG400024657 | Pentatricopeptide repeat-containing protein                | 0 | 1 | 0 | 0 | 0 | 0 | 0 | 0 | 0 | 4 | 0 | 5 |
| PGSC0003DMG400019503 | Pentatricopeptide repeat-containing protein                | 0 | 4 | 0 | 0 | 0 | 0 | 0 | 0 | 0 | 0 | 1 | 5 |
| PGSC0003DMG400033694 | Zinc finger homeodomain protein SZF-HD1                    | 2 | 2 | 0 | 0 | 0 | 0 | 0 | 0 | 0 | 1 | 0 | 5 |
| PGSC0003DMG401015201 | Receptor expression-enhancing protein                      | 2 | 2 | 0 | 1 | 0 | 0 | 0 | 0 | 0 | 0 | 0 | 5 |
| PGSC0003DMG400014137 | Protein TOPLESS                                            | 1 | 0 | 0 | 4 | 0 | 0 | 0 | 0 | 0 | 0 | 0 | 5 |
| PGSC0003DMG400015174 | DUF26 domain-containing protein 2                          | 3 | 2 | 0 | 0 | 0 | 0 | 0 | 0 | 0 | 0 | 0 | 5 |
| PGSC0003DMG400039752 | Exocyst complex component                                  | 4 | 1 | 0 | 0 | 0 | 0 | 0 | 0 | 0 | 0 | 0 | 5 |
| PGSC0003DMG400010149 | Conserved gene of unknown function                         | 2 | 2 | 0 | 0 | 0 | 0 | 0 | 0 | 0 | 1 | 0 | 5 |
| PGSC0003DMG400015206 | Conserved gene of unknown function                         | 1 | 4 | 0 | 0 | 0 | 0 | 0 | 0 | 0 | 0 | 0 | 5 |
| PGSC0003DMG400031746 | Gene of unknown function                                   | 0 | 2 | 0 | 0 | 0 | 0 | 0 | 0 | 0 | 0 | 3 | 5 |
| PGSC0003DMG400026495 | Gene of unknown function                                   | 1 | 2 | 1 | 0 | 0 | 0 | 0 | 0 | 0 | 1 | 0 | 5 |
| PGSC0003DMG400019830 | Conserved gene of unknown function                         | 0 | 1 | 3 | 0 | 0 | 0 | 0 | 0 | 0 | 0 | 1 | 5 |
| PGSC0003DMG401000594 | Flavonol synthase/flavanone 3-hydroxylase                  | 1 | 2 | 0 | 1 | 0 | 1 | 0 | 0 | 0 | 0 | 0 | 5 |
| PGSC0003DMG400025338 | Gene of unknown function                                   | 2 | 3 | 0 | 0 | 0 | 0 | 0 | 0 | 0 | 0 | 0 | 5 |
| PGSC0003DMG400024506 | Gene of unknown function                                   | 0 | 1 | 0 | 0 | 0 | 1 | 0 | 0 | 0 | 0 | 3 | 5 |
| PGSC0003DMG400018133 | Cytochrome P450 71A4                                       | 0 | 1 | 0 | 0 | 0 | 0 | 0 | 0 | 0 | 0 | 4 | 5 |
| PGSC0003DMG400018170 | Conserved gene of unknown function                         | 4 | 1 | 0 | 0 | 0 | 0 | 0 | 0 | 0 | 0 | 0 | 5 |
| PGSC0003DMG400024617 | UDP-glucosyltransferase                                    | 0 | 2 | 0 | 0 | 0 | 0 | 0 | 0 | 0 | 1 | 2 | 5 |
| PGSC0003DMG400015184 | Cytochrome P450                                            | 5 | 0 | 0 | 0 | 0 | 0 | 0 | 0 | 0 | 0 | 0 | 5 |
| PGSC0003DMG400014122 | Conserved gene of unknown function                         | 1 | 4 | 0 | 0 | 0 | 0 | 0 | 0 | 0 | 0 | 0 | 5 |
| PGSC0003DMG402014197 | Conserved gene of unknown function                         | 2 | 3 | 0 | 0 | 0 | 0 | 0 | 0 | 0 | 0 | 0 | 5 |
| PGSC0003DMG402024463 | Gene of unknown function                                   | 0 | 0 | 0 | 0 | 0 | 0 | 0 | 0 | 0 | 0 | 5 | 5 |
| PGSC0003DMG400024488 | IS10 transposase                                           | 2 | 2 | 0 | 0 | 0 | 0 | 0 | 0 | 0 | 0 | 1 | 5 |
| PGSC0003DMG400015186 | Pentatricopeptide repeat-containing protein, chloroplastic | 2 | 4 | 0 | 0 | 0 | 0 | 0 | 0 | 0 | 0 | 0 | 6 |
| PGSC0003DMG400018207 | Gene of unknown function                                   | 0 | 2 | 0 | 0 | 0 | 0 | 0 | 0 | 0 | 4 | 0 | 6 |
| PGSC0003DMG400042642 | Conserved gene of unknown function                         | 0 | 4 | 1 | 0 | 0 | 0 | 1 | 0 | 0 | 0 | 0 | 6 |
| PGSC0003DMG400024673 | Gene of unknown function                                   | 3 | 1 | 0 | 0 | 0 | 0 | 0 | 0 | 0 | 2 | 0 | 6 |
| PGSC0003DMG400041803 | Gene of unknown function                                   | 3 | 3 | 0 | 0 | 0 | 0 | 0 | 0 | 0 | 0 | 0 | 6 |
| PGSC0003DMG400024597 | DNA binding protein                                        | 1 | 2 | 0 | 0 | 1 | 2 | 0 | 0 | 0 | 0 | 0 | 6 |
| PGSC0003DMG400010183 | Receptor kinase                                            | 3 | 2 | 0 | 1 | 0 | 0 | 0 | 0 | 0 | 0 | 0 | 6 |
| PGSC0003DMG403004334 | Gene of unknown function                                   | 0 | 0 | 0 | 0 | 0 | 0 | 0 | 0 | 0 | 5 | 1 | 6 |

|                      |                                                             |   |   |   |   |   |   |   |   |   |   |   |   |
|----------------------|-------------------------------------------------------------|---|---|---|---|---|---|---|---|---|---|---|---|
| PGSC0003DMG40000646  | RNase H family protein                                      | 2 | 4 | 0 | 0 | 0 | 0 | 0 | 0 | 0 | 0 | 0 | 6 |
| PGSC0003DMG402024510 | Gene of unknown function                                    | 1 | 1 | 0 | 0 | 0 | 0 | 0 | 0 | 0 | 3 | 1 | 6 |
| PGSC0003DMG400019538 | 42kDa chitin-binding protein                                | 3 | 3 | 0 | 0 | 0 | 0 | 0 | 0 | 0 | 0 | 0 | 6 |
| PGSC0003DMG400000615 | Conserved gene of unknown function                          | 0 | 3 | 0 | 0 | 0 | 1 | 0 | 0 | 0 | 0 | 2 | 6 |
| PGSC0003DMG400004548 | Proteinase inhibitor type-2 CEVI57                          | 1 | 3 | 0 | 2 | 0 | 0 | 0 | 0 | 0 | 0 | 0 | 6 |
| PGSC0003DMG400024493 | Seven-transmembrane-domain protein 1                        | 2 | 0 | 0 | 4 | 0 | 0 | 0 | 0 | 0 | 0 | 0 | 6 |
| PGSC0003DMG400019537 | Glutathione s-transferase                                   | 3 | 1 | 0 | 0 | 0 | 0 | 0 | 0 | 0 | 2 | 0 | 6 |
| PGSC0003DMG400015267 | Kunitz-type protease inhibitor                              | 0 | 3 | 0 | 0 | 0 | 0 | 0 | 0 | 0 | 3 | 0 | 6 |
| PGSC0003DMG400024542 | Gene of unknown function                                    | 1 | 1 | 0 | 0 | 0 | 2 | 0 | 0 | 0 | 2 | 0 | 6 |
| PGSC0003DMG400018147 | Gene of unknown function                                    | 0 | 3 | 0 | 0 | 0 | 0 | 0 | 0 | 0 | 3 | 0 | 6 |
| PGSC0003DMG400024655 | SNF2 domain-containing protein / helicase domain-containing | 0 | 3 | 0 | 0 | 0 | 0 | 0 | 0 | 0 | 3 | 0 | 6 |
| PGSC0003DMG400018189 | Pectinesterase inhibitor                                    | 1 | 3 | 0 | 0 | 0 | 0 | 0 | 0 | 0 | 1 | 1 | 6 |
| PGSC0003DMG400024622 | Flavonol 4'-sulfotransferase                                | 1 | 0 | 0 | 0 | 0 | 0 | 0 | 0 | 0 | 5 | 0 | 6 |
| PGSC0003DMG400015293 | Gene of unknown function                                    | 0 | 2 | 0 | 0 | 0 | 0 | 0 | 0 | 0 | 3 | 1 | 6 |
| PGSC0003DMG400004547 | Proteinase inhibitor type-2 P303.51                         | 1 | 1 | 0 | 0 | 0 | 0 | 0 | 0 | 0 | 4 | 0 | 6 |
| PGSC0003DMG400019817 | Pentatricopeptide repeat-containing protein                 | 1 | 4 | 0 | 0 | 0 | 0 | 0 | 0 | 0 | 0 | 1 | 6 |
| PGSC0003DMG400024678 | Gene of unknown function                                    | 0 | 1 | 0 | 0 | 0 | 0 | 1 | 0 | 0 | 4 | 0 | 6 |
| PGSC0003DMG400000637 | GTP binding protein                                         | 2 | 1 | 0 | 0 | 2 | 0 | 0 | 0 | 0 | 1 | 0 | 6 |
| PGSC0003DMG400012021 | Armadillo/beta-catenin repeat family protein                | 3 | 2 | 0 | 0 | 0 | 0 | 0 | 0 | 0 | 2 | 0 | 7 |
| PGSC0003DMG400018125 | Gene of unknown function                                    | 1 | 4 | 0 | 0 | 0 | 0 | 0 | 0 | 0 | 0 | 2 | 7 |
| PGSC0003DMG400024606 | ERF transcription factor                                    | 1 | 2 | 0 | 0 | 0 | 0 | 0 | 0 | 0 | 3 | 1 | 7 |
| PGSC0003DMG400015286 | Miraculin                                                   | 2 | 5 | 0 | 0 | 0 | 0 | 0 | 0 | 0 | 0 | 0 | 7 |
| PGSC0003DMG401024649 | EMB2733/ESP3 (EMBRYO DEFECTIVE 2733)                        | 0 | 2 | 2 | 0 | 2 | 1 | 0 | 0 | 0 | 0 | 0 | 7 |
| PGSC0003DMG400012024 | O-methyltransferase                                         | 1 | 1 | 0 | 0 | 0 | 0 | 0 | 0 | 0 | 5 | 0 | 7 |
| PGSC0003DMG400024602 | Conserved gene of unknown function                          | 4 | 2 | 0 | 0 | 0 | 0 | 0 | 0 | 0 | 0 | 1 | 7 |
| PGSC0003DMG400010159 | Conserved gene of unknown function                          | 1 | 0 | 0 | 0 | 0 | 0 | 0 | 0 | 0 | 4 | 2 | 7 |
| PGSC0003DMG401000629 | Stigma-specific protein Stig1                               | 3 | 3 | 0 | 0 | 0 | 0 | 1 | 0 | 0 | 0 | 0 | 7 |
| PGSC0003DMG400018196 | CYP71AU1                                                    | 3 | 4 | 0 | 0 | 0 | 0 | 0 | 0 | 0 | 0 | 0 | 7 |
| PGSC0003DMG400019818 | Conserved gene of unknown function                          | 1 | 3 | 2 | 0 | 0 | 1 | 0 | 0 | 0 | 0 | 0 | 7 |
| PGSC0003DMG400010148 | Miraculin                                                   | 2 | 1 | 0 | 4 | 0 | 0 | 0 | 0 | 0 | 0 | 0 | 7 |
| PGSC0003DMG400024650 | Ubiquitin-protein ligase                                    | 2 | 5 | 0 | 0 | 0 | 0 | 0 | 0 | 0 | 0 | 0 | 7 |
| PGSC0003DMG400024618 | UDP-glucosyltransferase                                     | 3 | 1 | 0 | 0 | 0 | 0 | 0 | 0 | 0 | 1 | 2 | 7 |
| PGSC0003DMG400015303 | Conserved gene of unknown function                          | 0 | 0 | 0 | 0 | 0 | 0 | 0 | 0 | 0 | 0 | 7 | 7 |
| PGSC0003DMG400014201 | Jp18                                                        | 2 | 1 | 0 | 0 | 0 | 0 | 0 | 0 | 0 | 2 | 2 | 7 |
| PGSC0003DMG400019511 | NAD-malate dehydrogenase                                    | 1 | 0 | 6 | 0 | 0 | 0 | 0 | 0 | 0 | 0 | 0 | 7 |
| PGSC0003DMG400037301 | NB-ARC domain containing protein                            | 1 | 5 | 0 | 0 | 0 | 0 | 1 | 0 | 0 | 0 | 0 | 7 |
| PGSC0003DMG400014204 | Transcription factor TSRF1                                  | 2 | 3 | 0 | 0 | 0 | 0 | 0 | 0 | 0 | 0 | 2 | 7 |
| PGSC0003DMG404024620 | Conserved gene of unknown function                          | 2 | 5 | 0 | 0 | 0 | 0 | 0 | 0 | 0 | 0 | 0 | 7 |
| PGSC0003DMG400040550 | NAC transcription factor                                    | 2 | 5 | 0 | 0 | 0 | 0 | 0 | 0 | 0 | 0 | 0 | 7 |
| PGSC0003DMG400010189 | Gene of unknown function                                    | 2 | 4 | 0 | 0 | 0 | 0 | 0 | 0 | 0 | 1 | 0 | 7 |
| PGSC0003DMG400018206 | Conserved gene of unknown function                          | 3 | 0 | 0 | 0 | 0 | 0 | 0 | 0 | 0 | 0 | 4 | 7 |
| PGSC0003DMG400000603 | Conserved gene of unknown function                          | 2 | 3 | 0 | 1 | 0 | 0 | 0 | 0 | 0 | 1 | 0 | 7 |
| PGSC0003DMG401031741 | UPA16                                                       | 1 | 1 | 0 | 0 | 5 | 1 | 0 | 0 | 0 | 0 | 0 | 8 |
| PGSC0003DMG400015287 | Proteinase inhibitor type-2 CEVI57                          | 3 | 3 | 0 | 1 | 0 | 0 | 0 | 0 | 0 | 1 | 0 | 8 |

|                      |                                                                |   |   |   |   |   |   |   |   |   |   |   |   |
|----------------------|----------------------------------------------------------------|---|---|---|---|---|---|---|---|---|---|---|---|
| PGSC0003DMG400019535 | MYB domain class transcription factor                          | 3 | 1 | 0 | 0 | 0 | 0 | 0 | 0 | 0 | 2 | 2 | 8 |
| PGSC0003DMG400015222 | Transposase                                                    | 2 | 5 | 1 | 0 | 0 | 0 | 0 | 0 | 0 | 0 | 0 | 8 |
| PGSC0003DMG400014203 | Amino acid transporter                                         | 5 | 1 | 0 | 0 | 0 | 0 | 0 | 0 | 0 | 1 | 1 | 8 |
| PGSC0003DMG400010130 | Conserved gene of unknown function                             | 0 | 0 | 0 | 0 | 3 | 0 | 0 | 0 | 0 | 4 | 1 | 8 |
| PGSC0003DMG400014132 | Conserved gene of unknown function                             | 1 | 2 | 0 | 0 | 0 | 0 | 0 | 0 | 0 | 5 | 0 | 8 |
| PGSC0003DMG400024530 | Protein COBRA                                                  | 2 | 3 | 0 | 0 | 0 | 0 | 0 | 0 | 0 | 1 | 2 | 8 |
| PGSC0003DMG400024518 | Conserved gene of unknown function                             | 2 | 5 | 0 | 0 | 0 | 0 | 1 | 0 | 0 | 0 | 0 | 8 |
| PGSC0003DMG400019531 | EMB514                                                         | 1 | 3 | 0 | 4 | 0 | 0 | 0 | 0 | 0 | 0 | 0 | 8 |
| PGSC0003DMG400024507 | Gene of unknown function                                       | 0 | 0 | 0 | 0 | 0 | 0 | 0 | 0 | 0 | 7 | 1 | 8 |
| PGSC0003DMG400010141 | Stigma expressed protein                                       | 4 | 4 | 0 | 0 | 0 | 0 | 0 | 0 | 0 | 0 | 0 | 8 |
| PGSC0003DMG403024610 | Conserved gene of unknown function                             | 2 | 2 | 2 | 0 | 0 | 0 | 0 | 0 | 0 | 2 | 0 | 8 |
| PGSC0003DMG400014129 | Vegetative cell wall protein gp1                               | 5 | 3 | 0 | 0 | 0 | 0 | 0 | 0 | 0 | 0 | 0 | 8 |
| PGSC0003DMG400009513 | Aspartic protease inhibitor 5                                  | 2 | 6 | 0 | 0 | 0 | 0 | 0 | 0 | 0 | 0 | 0 | 8 |
| PGSC0003DMG400043406 | Ubiquitin-protein ligase                                       | 3 | 3 | 0 | 2 | 0 | 0 | 0 | 0 | 0 | 0 | 0 | 8 |
| PGSC0003DMG400024605 | Ubiquitin-protein ligase                                       | 5 | 3 | 0 | 0 | 0 | 0 | 0 | 0 | 0 | 0 | 0 | 8 |
| PGSC0003DMG400010177 | Pentatricopeptide                                              | 3 | 5 | 0 | 0 | 0 | 0 | 0 | 0 | 0 | 0 | 0 | 8 |
| PGSC0003DMG400000631 | Lactoylglutathione lyase                                       | 0 | 0 | 0 | 0 | 2 | 0 | 0 | 0 | 0 | 5 | 1 | 8 |
| PGSC0003DMG400014143 | Major allergen Pru ar                                          | 3 | 3 | 1 | 0 | 0 | 0 | 0 | 0 | 0 | 0 | 1 | 8 |
| PGSC0003DMG400015306 | Gene of unknown function                                       | 3 | 2 | 0 | 0 | 0 | 0 | 0 | 0 | 0 | 1 | 2 | 8 |
| PGSC0003DMG401015159 | Eukaryotic translation initiation factor 2c                    | 3 | 0 | 0 | 0 | 4 | 1 | 0 | 0 | 0 | 0 | 0 | 8 |
| PGSC0003DMG400019510 | Geranylgeranyl diphosphate reductase, chloroplastic            | 8 | 0 | 0 | 0 | 0 | 0 | 0 | 0 | 0 | 0 | 0 | 8 |
| PGSC0003DMG400015219 | Miraculin                                                      | 1 | 0 | 0 | 0 | 0 | 0 | 0 | 0 | 0 | 7 | 0 | 8 |
| PGSC0003DMG400026482 | Protein HVA22                                                  | 0 | 3 | 0 | 0 | 5 | 0 | 0 | 0 | 0 | 0 | 0 | 8 |
| PGSC0003DMG402015175 | Gene of unknown function                                       | 2 | 2 | 0 | 0 | 0 | 0 | 0 | 1 | 0 | 0 | 3 | 8 |
| PGSC0003DMG400033682 | Potassium channel SKOR                                         | 0 | 0 | 0 | 0 | 6 | 0 | 0 | 0 | 0 | 3 | 0 | 9 |
| PGSC0003DMG400024568 | Rhcadhesin receptor                                            | 5 | 4 | 0 | 0 | 0 | 0 | 0 | 0 | 0 | 0 | 0 | 9 |
| PGSC0003DMG400024462 | Axonemal dynein light chain                                    | 2 | 6 | 0 | 0 | 0 | 0 | 0 | 0 | 0 | 1 | 0 | 9 |
| PGSC0003DMG400024682 | Gene of unknown function                                       | 1 | 0 | 0 | 0 | 0 | 0 | 0 | 0 | 0 | 1 | 7 | 9 |
| PGSC0003DMG400018124 | Gene of unknown function                                       | 1 | 1 | 0 | 0 | 0 | 0 | 0 | 0 | 0 | 5 | 2 | 9 |
| PGSC0003DMG400024677 | Gene of unknown function                                       | 1 | 3 | 0 | 0 | 0 | 0 | 1 | 0 | 0 | 3 | 1 | 9 |
| PGSC0003DMG400025350 | Small heat-shock protein                                       | 0 | 9 | 0 | 0 | 0 | 0 | 0 | 0 | 0 | 0 | 0 | 9 |
| PGSC0003DMG400014130 | F-box/LRR-repeat protein                                       | 5 | 2 | 0 | 0 | 0 | 0 | 0 | 0 | 0 | 2 | 0 | 9 |
| PGSC0003DMG400010147 | Kunitz-type enzyme inhibitor S9C11                             | 2 | 3 | 0 | 0 | 0 | 0 | 0 | 0 | 0 | 3 | 1 | 9 |
| PGSC0003DMG402000629 | Stigma-specific protein Stig1                                  | 3 | 3 | 0 | 0 | 0 | 0 | 1 | 0 | 0 | 0 | 2 | 9 |
| PGSC0003DMG402015201 | Receptor expression-enhancing protein                          | 0 | 0 | 0 | 9 | 0 | 0 | 0 | 0 | 0 | 0 | 0 | 9 |
| PGSC0003DMG400019825 | Cinnamoyl CoA reductase                                        | 0 | 1 | 0 | 0 | 7 | 0 | 0 | 0 | 0 | 0 | 1 | 9 |
| PGSC0003DMG400019530 | Pentatricopeptide repeat-containing protein                    | 1 | 2 | 0 | 0 | 0 | 0 | 0 | 1 | 0 | 5 | 0 | 9 |
| PGSC0003DMG400018087 | Conserved gene of unknown function                             | 3 | 3 | 0 | 0 | 0 | 1 | 0 | 0 | 0 | 2 | 0 | 9 |
| PGSC0003DMG400024550 | ZPT4-3                                                         | 4 | 1 | 0 | 0 | 0 | 0 | 0 | 0 | 0 | 3 | 1 | 9 |
| PGSC0003DMG400004330 | Ulp1 protease family, C-terminal catalytic domain containing p | 0 | 2 | 4 | 0 | 0 | 0 | 0 | 0 | 0 | 0 | 3 | 9 |
| PGSC0003DMG400015173 | ATP binding protein                                            | 6 | 3 | 0 | 0 | 0 | 0 | 0 | 0 | 0 | 0 | 0 | 9 |
| PGSC0003DMG400000634 | CAPIP2                                                         | 1 | 1 | 0 | 0 | 0 | 1 | 0 | 0 | 0 | 3 | 3 | 9 |
| PGSC0003DMG400010170 | Miraculin                                                      | 0 | 0 | 6 | 0 | 0 | 1 | 0 | 0 | 0 | 2 | 0 | 9 |
| PGSC0003DMG401010181 | Pentatricopeptide repeat domain containing protein             | 4 | 3 | 0 | 0 | 0 | 0 | 0 | 0 | 0 | 2 | 0 | 9 |

|                      |                                                            |   |    |   |    |   |   |   |   |   |    |   |    |
|----------------------|------------------------------------------------------------|---|----|---|----|---|---|---|---|---|----|---|----|
| PGSC0003DMG401019860 | Alpha-2, 8-sialyltransferase 8b                            | 1 | 3  | 0 | 0  | 0 | 0 | 0 | 0 | 0 | 0  | 5 | 9  |
| PGSC0003DMG400039636 | Ccaat-binding transcription factor                         | 3 | 5  | 0 | 0  | 0 | 0 | 1 | 0 | 0 | 0  | 0 | 9  |
| PGSC0003DMG400041876 | Conserved gene of unknown function                         | 2 | 6  | 0 | 0  | 0 | 0 | 1 | 0 | 0 | 0  | 0 | 9  |
| PGSC0003DMG400040994 | Ring finger protein                                        | 4 | 5  | 0 | 0  | 0 | 0 | 0 | 0 | 0 | 0  | 0 | 9  |
| PGSC0003DMG400000613 | Nucleic acid binding protein                               | 0 | 0  | 0 | 6  | 0 | 0 | 0 | 0 | 0 | 3  | 0 | 9  |
| PGSC0003DMG400015269 | GRP 2                                                      | 8 | 0  | 2 | 0  | 0 | 0 | 0 | 0 | 0 | 0  | 0 | 10 |
| PGSC0003DMG400019527 | Calcium ion binding protein                                | 1 | 1  | 0 | 0  | 0 | 0 | 0 | 0 | 0 | 0  | 8 | 10 |
| PGSC0003DMG400014200 | Flotillin-1                                                | 2 | 4  | 0 | 1  | 0 | 0 | 0 | 0 | 0 | 3  | 0 | 10 |
| PGSC0003DMG400018134 | Cytochrome P450 71A4                                       | 2 | 5  | 3 | 0  | 0 | 0 | 0 | 0 | 0 | 0  | 0 | 10 |
| PGSC0003DMG400015203 | Protein transport protein SEC61 subunit gamma              | 0 | 0  | 9 | 0  | 0 | 0 | 0 | 0 | 0 | 1  | 0 | 10 |
| PGSC0003DMG400014206 | Conserved gene of unknown function                         | 4 | 2  | 0 | 0  | 0 | 1 | 1 | 0 | 0 | 0  | 2 | 10 |
| PGSC0003DMG400019536 | Conserved gene of unknown function                         | 1 | 2  | 4 | 0  | 0 | 0 | 0 | 0 | 0 | 2  | 1 | 10 |
| PGSC0003DMG400010155 | Gene of unknown function                                   | 1 | 1  | 0 | 0  | 0 | 0 | 0 | 0 | 0 | 8  | 0 | 10 |
| PGSC0003DMG400000622 | Conserved gene of unknown function                         | 2 | 2  | 0 | 6  | 0 | 0 | 0 | 0 | 0 | 0  | 0 | 10 |
| PGSC0003DMG400031046 | Sucrose synthase                                           | 0 | 1  | 0 | 0  | 0 | 0 | 0 | 0 | 0 | 9  | 0 | 10 |
| PGSC0003DMG400015290 | Proteinase inhibitor type-2 CEVI57                         | 3 | 1  | 0 | 0  | 0 | 1 | 0 | 0 | 0 | 5  | 0 | 10 |
| PGSC0003DMG400024495 | DNA binding protein                                        | 6 | 4  | 0 | 0  | 0 | 0 | 0 | 0 | 0 | 0  | 0 | 10 |
| PGSC0003DMG400018186 | Conserved gene of unknown function                         | 4 | 1  | 0 | 0  | 0 | 0 | 0 | 0 | 0 | 2  | 3 | 10 |
| PGSC0003DMG400004335 | MTN3 homolog                                               | 0 | 1  | 0 | 0  | 9 | 0 | 0 | 0 | 0 | 0  | 0 | 10 |
| PGSC0003DMG400019816 | Conserved gene of unknown function                         | 3 | 2  | 0 | 5  | 0 | 0 | 0 | 0 | 0 | 0  | 0 | 10 |
| PGSC0003DMG400024563 | Gene of unknown function                                   | 4 | 4  | 0 | 0  | 0 | 1 | 1 | 0 | 0 | 0  | 0 | 10 |
| PGSC0003DMG400019517 | Chitin-binding lectin 1                                    | 2 | 8  | 0 | 0  | 0 | 0 | 0 | 0 | 0 | 0  | 0 | 10 |
| PGSC0003DMG400024452 | Pyridoxal-dependent decarboxylase, C-terminal sheet domain | 4 | 6  | 0 | 0  | 0 | 0 | 0 | 0 | 0 | 0  | 0 | 10 |
| PGSC0003DMG400018156 | Ubiquitin-protein ligase                                   | 4 | 1  | 0 | 0  | 0 | 0 | 0 | 0 | 0 | 2  | 3 | 10 |
| PGSC0003DMG400024600 | Conserved gene of unknown function                         | 2 | 2  | 0 | 0  | 0 | 0 | 0 | 0 | 0 | 2  | 4 | 10 |
| PGSC0003DMG400018146 | Pectinesterase                                             | 1 | 0  | 0 | 0  | 0 | 0 | 0 | 0 | 0 | 9  | 0 | 10 |
| PGSC0003DMG400036966 | UDP-glucose 6-dehydrogenase                                | 6 | 4  | 0 | 0  | 0 | 0 | 0 | 0 | 0 | 0  | 0 | 10 |
| PGSC0003DMG400024504 | Conserved gene of unknown function                         | 5 | 2  | 0 | 0  | 0 | 0 | 0 | 0 | 0 | 3  | 0 | 10 |
| PGSC0003DMG400033695 | DC1 domain containing protein                              | 0 | 2  | 0 | 0  | 0 | 0 | 0 | 0 | 0 | 3  | 5 | 10 |
| PGSC0003DMG400014128 | Plasma membrane proton ATPase                              | 5 | 0  | 2 | 0  | 0 | 1 | 0 | 0 | 0 | 3  | 0 | 11 |
| PGSC0003DMG400024604 | Calmodulin                                                 | 7 | 2  | 0 | 0  | 0 | 0 | 0 | 0 | 0 | 0  | 2 | 11 |
| PGSC0003DMG400024486 | Conserved gene of unknown function                         | 1 | 3  | 0 | 0  | 0 | 0 | 0 | 0 | 0 | 3  | 4 | 11 |
| PGSC0003DMG400018085 | F-box domain containing protein                            | 0 | 6  | 0 | 0  | 0 | 0 | 0 | 0 | 0 | 4  | 1 | 11 |
| PGSC0003DMG400018102 | Calmodulin-binding protein                                 | 5 | 5  | 0 | 0  | 0 | 0 | 0 | 0 | 0 | 1  | 0 | 11 |
| PGSC0003DMG400015227 | Conserved gene of unknown function                         | 0 | 0  | 0 | 11 | 0 | 0 | 0 | 0 | 0 | 0  | 0 | 11 |
| PGSC0003DMG400014199 | Nodulin                                                    | 4 | 4  | 3 | 0  | 0 | 0 | 0 | 0 | 0 | 0  | 0 | 11 |
| PGSC0003DMG400024540 | Heat shock protein                                         | 1 | 9  | 0 | 0  | 1 | 0 | 0 | 0 | 0 | 0  | 0 | 11 |
| PGSC0003DMG400024519 | Pentatricopeptide repeat-containing protein                | 0 | 0  | 0 | 0  | 0 | 0 | 0 | 0 | 0 | 11 | 0 | 11 |
| PGSC0003DMG400015282 | F-box protein interaction domain containing protein        | 1 | 10 | 0 | 0  | 0 | 0 | 0 | 0 | 0 | 0  | 0 | 11 |
| PGSC0003DMG400000604 | Zinc finger (CCCH-type) family protein                     | 0 | 2  | 0 | 9  | 0 | 0 | 0 | 0 | 0 | 0  | 0 | 11 |
| PGSC0003DMG400019505 | Alpha-1, 2-fucosyltransferase                              | 4 | 6  | 0 | 1  | 0 | 0 | 0 | 0 | 0 | 0  | 0 | 11 |
| PGSC0003DMG400024661 | Brassinosteroid LRR receptor kinase                        | 7 | 2  | 0 | 0  | 2 | 0 | 0 | 0 | 0 | 0  | 0 | 11 |
| PGSC0003DMG401031052 | Conserved gene of unknown function                         | 1 | 2  | 0 | 0  | 0 | 0 | 0 | 0 | 0 | 4  | 4 | 11 |
| PGSC0003DMG400012023 | O-methyltransferase                                        | 4 | 6  | 0 | 0  | 1 | 0 | 0 | 0 | 0 | 0  | 0 | 11 |

|                      |                                                             |   |   |    |    |    |   |   |   |   |   |   |    |
|----------------------|-------------------------------------------------------------|---|---|----|----|----|---|---|---|---|---|---|----|
| PGSC0003DMG400015272 | DNA binding protein                                         | 1 | 3 | 7  | 0  | 0  | 0 | 0 | 0 | 0 | 0 | 0 | 11 |
| PGSC0003DMG400019822 | N-acetyltransferase                                         | 2 | 2 | 0  | 7  | 0  | 0 | 0 | 0 | 0 | 0 | 0 | 11 |
| PGSC0003DMG400015178 | Heat shock protein                                          | 1 | 2 | 0  | 0  | 0  | 0 | 0 | 0 | 0 | 5 | 3 | 11 |
| PGSC0003DMG400025341 | Gene of unknown function                                    | 1 | 4 | 6  | 0  | 0  | 0 | 0 | 0 | 0 | 0 | 0 | 11 |
| PGSC0003DMG400024467 | Putative anti-virus transcriptional factor                  | 3 | 4 | 0  | 0  | 1  | 0 | 0 | 0 | 0 | 0 | 4 | 12 |
| PGSC0003DMG400014133 | F-box family protein                                        | 1 | 7 | 0  | 0  | 0  | 0 | 0 | 0 | 0 | 4 | 0 | 12 |
| PGSC0003DMG400000623 | Conserved gene of unknown function                          | 1 | 2 | 7  | 0  | 0  | 0 | 0 | 0 | 0 | 1 | 1 | 12 |
| PGSC0003DMG400018123 | Gene of unknown function                                    | 3 | 2 | 0  | 0  | 0  | 0 | 0 | 0 | 0 | 3 | 4 | 12 |
| PGSC0003DMG400000618 | Conserved gene of unknown function                          | 1 | 1 | 0  | 4  | 0  | 0 | 0 | 0 | 0 | 4 | 2 | 12 |
| PGSC0003DMG400000607 | Conserved gene of unknown function                          | 4 | 3 | 0  | 0  | 0  | 0 | 0 | 0 | 0 | 2 | 3 | 12 |
| PGSC0003DMG400012022 | MdSFB3-alpha protein                                        | 3 | 5 | 0  | 0  | 0  | 0 | 0 | 0 | 0 | 4 | 0 | 12 |
| PGSC0003DMG400004338 | Mitochondrial import inner membrane translocase subunit Tir | 0 | 0 | 12 | 0  | 0  | 0 | 0 | 0 | 0 | 0 | 0 | 12 |
| PGSC0003DMG401014189 | Conserved gene of unknown function                          | 0 | 0 | 0  | 12 | 0  | 0 | 0 | 0 | 0 | 0 | 0 | 12 |
| PGSC0003DMG400010146 | Kunitz-type tuber invertase inhibitor                       | 3 | 9 | 0  | 0  | 0  | 0 | 0 | 0 | 0 | 0 | 0 | 12 |
| PGSC0003DMG400024514 | Gene of unknown function                                    | 2 | 0 | 0  | 0  | 0  | 0 | 0 | 0 | 0 | 9 | 1 | 12 |
| PGSC0003DMG400018112 | Protein LATERAL ORGAN BOUNDARIES                            | 3 | 1 | 0  | 0  | 8  | 0 | 0 | 0 | 0 | 0 | 0 | 12 |
| PGSC0003DMG400031035 | Conserved gene of unknown function                          | 1 | 6 | 0  | 5  | 0  | 0 | 0 | 0 | 0 | 0 | 0 | 12 |
| PGSC0003DMG400010172 | Gene of unknown function                                    | 1 | 2 | 0  | 1  | 0  | 0 | 0 | 0 | 0 | 1 | 7 | 12 |
| PGSC0003DMG400014190 | Conserved gene of unknown function                          | 0 | 0 | 7  | 0  | 0  | 0 | 0 | 0 | 0 | 4 | 1 | 12 |
| PGSC0003DMG400026476 | Transporter                                                 | 2 | 1 | 0  | 0  | 8  | 0 | 0 | 0 | 0 | 0 | 1 | 12 |
| PGSC0003DMG400009514 | Kunitz-type protease inhibitor                              | 3 | 2 | 0  | 0  | 0  | 0 | 0 | 0 | 0 | 7 | 0 | 12 |
| PGSC0003DMG400024627 | GRP 2                                                       | 6 | 2 | 1  | 0  | 0  | 0 | 0 | 0 | 0 | 3 | 0 | 12 |
| PGSC0003DMG400019513 | Activating signal cointegrator                              | 1 | 2 | 0  | 8  | 0  | 0 | 0 | 0 | 0 | 1 | 0 | 12 |
| PGSC0003DMG400018098 | Conserved gene of unknown function                          | 2 | 4 | 0  | 0  | 0  | 0 | 0 | 0 | 0 | 5 | 2 | 13 |
| PGSC0003DMG400025345 | Conserved gene of unknown function                          | 7 | 1 | 0  | 1  | 0  | 0 | 0 | 1 | 0 | 0 | 3 | 13 |
| PGSC0003DMG400024656 | Conserved gene of unknown function                          | 3 | 3 | 0  | 0  | 0  | 0 | 0 | 0 | 0 | 5 | 2 | 13 |
| PGSC0003DMG402014139 | Beta transducin                                             | 0 | 1 | 11 | 0  | 0  | 0 | 0 | 0 | 0 | 0 | 1 | 13 |
| PGSC0003DMG400019516 | Chitin-binding lectin                                       | 0 | 5 | 0  | 0  | 0  | 0 | 0 | 0 | 0 | 0 | 8 | 13 |
| PGSC0003DMG400018162 | Trithorax                                                   | 6 | 4 | 0  | 0  | 0  | 0 | 0 | 0 | 0 | 2 | 1 | 13 |
| PGSC0003DMG402024620 | Gene of unknown function                                    | 1 | 2 | 0  | 0  | 0  | 0 | 1 | 0 | 0 | 5 | 4 | 13 |
| PGSC0003DMG400031731 | Feruloyl transferase                                        | 1 | 1 | 0  | 7  | 0  | 0 | 0 | 0 | 0 | 4 | 0 | 13 |
| PGSC0003DMG400015230 | Pectate lyase                                               | 6 | 0 | 0  | 0  | 4  | 0 | 0 | 0 | 0 | 2 | 1 | 13 |
| PGSC0003DMG400000638 | Histidine-containing phosphotransfer protein                | 1 | 2 | 0  | 0  | 10 | 0 | 0 | 0 | 0 | 0 | 0 | 13 |
| PGSC0003DMG400024546 | 40S ribosomal protein S19                                   | 1 | 1 | 0  | 11 | 0  | 0 | 0 | 0 | 0 | 0 | 0 | 13 |
| PGSC0003DMG400024572 | MYB transcription factor                                    | 6 | 2 | 0  | 0  | 0  | 1 | 0 | 0 | 0 | 3 | 1 | 13 |
| PGSC0003DMG400026484 | Gene of unknown function                                    | 6 | 7 | 0  | 0  | 0  | 0 | 0 | 0 | 0 | 0 | 0 | 13 |
| PGSC0003DMG401015244 | Conserved gene of unknown function                          | 0 | 1 | 0  | 7  | 0  | 0 | 0 | 0 | 0 | 5 | 0 | 13 |
| PGSC0003DMG400025331 | Short chain alcohol dehydrogenase                           | 2 | 4 | 0  | 0  | 0  | 0 | 0 | 0 | 0 | 6 | 1 | 13 |
| PGSC0003DMG400015237 | Purine permease                                             | 5 | 3 | 0  | 0  | 0  | 0 | 0 | 0 | 0 | 4 | 1 | 13 |
| PGSC0003DMG400015149 | Cytochrome P450 71A4                                        | 6 | 5 | 0  | 2  | 0  | 0 | 0 | 0 | 0 | 0 | 0 | 13 |
| PGSC0003DMG400024564 | Conserved gene of unknown function                          | 5 | 3 | 0  | 0  | 0  | 0 | 0 | 0 | 0 | 5 | 0 | 13 |
| PGSC0003DMG400024494 | Phosphoglycerate mutase                                     | 6 | 1 | 0  | 0  | 1  | 0 | 0 | 0 | 0 | 4 | 1 | 13 |
| PGSC0003DMG401014197 | Serine/threonine-protein kinase PBS1                        | 2 | 2 | 0  | 8  | 0  | 1 | 0 | 0 | 0 | 0 | 0 | 13 |
| PGSC0003DMG400018179 | Armadillo/beta-catenin repeat family protein                | 5 | 4 | 0  | 0  | 0  | 0 | 0 | 0 | 0 | 3 | 1 | 13 |



|                      |                                                  |    |   |    |    |   |   |   |   |   |    |   |    |
|----------------------|--------------------------------------------------|----|---|----|----|---|---|---|---|---|----|---|----|
| PGSC0003DMG400018166 | Transporter                                      | 1  | 1 | 0  | 9  | 0 | 1 | 0 | 0 | 0 | 2  | 0 | 14 |
| PGSC0003DMG400024466 | ATP-binding cassette transporter                 | 9  | 2 | 0  | 0  | 0 | 0 | 0 | 0 | 0 | 2  | 1 | 14 |
| PGSC0003DMG401000630 | Conserved gene of unknown function               | 4  | 1 | 0  | 3  | 0 | 1 | 0 | 0 | 0 | 0  | 5 | 14 |
| PGSC0003DMG402024472 | C2H2L domain class transcription factor          | 8  | 4 | 0  | 0  | 0 | 0 | 0 | 0 | 0 | 2  | 0 | 14 |
| PGSC0003DMG400024460 | TRNA ligase                                      | 1  | 0 | 0  | 4  | 0 | 0 | 0 | 0 | 0 | 4  | 5 | 14 |
| PGSC0003DMG400015164 | Conserved gene of unknown function               | 8  | 1 | 0  | 0  | 0 | 0 | 0 | 0 | 0 | 1  | 4 | 14 |
| PGSC0003DMG400024664 | Conserved gene of unknown function               | 5  | 3 | 0  | 0  | 0 | 0 | 0 | 0 | 0 | 6  | 0 | 14 |
| PGSC0003DMG400000606 | Ubiquitin-protein ligase                         | 6  | 5 | 0  | 0  | 0 | 0 | 0 | 0 | 0 | 3  | 0 | 14 |
| PGSC0003DMG400025342 | Homeobox                                         | 5  | 2 | 0  | 0  | 0 | 0 | 0 | 0 | 0 | 1  | 6 | 14 |
| PGSC0003DMG400026481 | Inositol polyphosphate kinase                    | 7  | 3 | 0  | 0  | 0 | 0 | 0 | 0 | 0 | 2  | 2 | 14 |
| PGSC0003DMG400018169 | Cyclin D2.1 protein                              | 0  | 2 | 0  | 0  | 0 | 0 | 0 | 0 | 0 | 8  | 4 | 14 |
| PGSC0003DMG400024526 | L-asparaginase                                   | 3  | 2 | 0  | 9  | 0 | 0 | 0 | 0 | 0 | 0  | 0 | 14 |
| PGSC0003DMG400010154 | Conserved gene of unknown function               | 3  | 3 | 0  | 0  | 0 | 0 | 0 | 0 | 0 | 6  | 2 | 14 |
| PGSC0003DMG400024587 | Conserved gene of unknown function               | 1  | 1 | 4  | 0  | 0 | 0 | 0 | 0 | 0 | 6  | 2 | 14 |
| PGSC0003DMG400031049 | Nucleic acid binding protein                     | 4  | 3 | 0  | 7  | 0 | 0 | 0 | 0 | 0 | 0  | 0 | 14 |
| PGSC0003DMG400015242 | Cytochrome P450                                  | 10 | 3 | 0  | 0  | 0 | 0 | 0 | 0 | 0 | 1  | 0 | 14 |
| PGSC0003DMG400038576 | Conserved gene of unknown function               | 2  | 4 | 0  | 8  | 0 | 0 | 0 | 0 | 0 | 0  | 0 | 14 |
| PGSC0003DMG400018088 | F-box family protein                             | 1  | 3 | 0  | 3  | 0 | 0 | 0 | 0 | 0 | 3  | 4 | 14 |
| PGSC0003DMG400000597 | Transcription factor                             | 4  | 3 | 0  | 0  | 0 | 0 | 0 | 0 | 0 | 3  | 4 | 14 |
| PGSC0003DMG400025630 | Conserved gene of unknown function               | 2  | 0 | 0  | 8  | 0 | 0 | 0 | 0 | 0 | 5  | 0 | 15 |
| PGSC0003DMG400024630 | Cytochrome P450                                  | 6  | 6 | 0  | 0  | 1 | 0 | 0 | 0 | 0 | 1  | 1 | 15 |
| PGSC0003DMG400018150 | Phosphate/phosphoenolpyruvate translocator       | 3  | 0 | 7  | 0  | 0 | 1 | 0 | 0 | 0 | 4  | 0 | 15 |
| PGSC0003DMG402004334 | Pyruvate dehydrogenase E1 component subunit beta | 2  | 0 | 0  | 0  | 0 | 0 | 0 | 0 | 0 | 13 | 0 | 15 |
| PGSC0003DMG400037684 | Double-stranded RNA binding protein              | 0  | 8 | 0  | 0  | 4 | 3 | 0 | 0 | 0 | 0  | 0 | 15 |
| PGSC0003DMG400031737 | Conserved gene of unknown function               | 1  | 0 | 7  | 0  | 0 | 0 | 0 | 0 | 1 | 4  | 2 | 15 |
| PGSC0003DMG400018135 | Cytochrome P450 71A4                             | 5  | 8 | 0  | 1  | 0 | 0 | 0 | 0 | 0 | 1  | 0 | 15 |
| PGSC0003DMG400000605 | DNA binding protein                              | 5  | 6 | 0  | 4  | 0 | 0 | 0 | 0 | 0 | 0  | 0 | 15 |
| PGSC0003DMG400026477 | Transparent testa glabra 1                       | 5  | 3 | 0  | 0  | 0 | 0 | 0 | 0 | 0 | 3  | 4 | 15 |
| PGSC0003DMG400015236 | Gene of unknown function                         | 0  | 1 | 0  | 14 | 0 | 0 | 0 | 0 | 0 | 0  | 0 | 15 |
| PGSC0003DMG400010152 | Integral membrane protein                        | 1  | 0 | 3  | 8  | 0 | 0 | 0 | 0 | 0 | 0  | 3 | 15 |
| PGSC0003DMG400018105 | Ubiquitin-protein ligase                         | 7  | 8 | 0  | 0  | 0 | 0 | 0 | 0 | 0 | 0  | 0 | 15 |
| PGSC0003DMG400019861 | BHLH transcription factor Upa20                  | 1  | 2 | 0  | 0  | 7 | 0 | 0 | 0 | 0 | 3  | 2 | 15 |
| PGSC0003DMG400018198 | 70 kDa subunit of replication protein A          | 2  | 7 | 4  | 0  | 0 | 2 | 0 | 0 | 0 | 0  | 0 | 15 |
| PGSC0003DMG400018128 | Protein phosphatase 2c                           | 9  | 1 | 0  | 0  | 0 | 0 | 0 | 0 | 0 | 4  | 1 | 15 |
| PGSC0003DMG400024554 | DNA binding protein                              | 2  | 2 | 0  | 0  | 7 | 0 | 0 | 0 | 0 | 3  | 1 | 15 |
| PGSC0003DMG400018097 | Conserved gene of unknown function               | 4  | 0 | 10 | 0  | 0 | 1 | 0 | 0 | 0 | 0  | 0 | 15 |
| PGSC0003DMG400000600 | Protein HVA22                                    | 2  | 0 | 3  | 0  | 5 | 0 | 0 | 0 | 0 | 4  | 1 | 15 |
| PGSC0003DMG400024556 | Dimethylaniline monooxygenase                    | 2  | 2 | 0  | 4  | 0 | 0 | 0 | 0 | 0 | 1  | 6 | 15 |
| PGSC0003DMG400015220 | Cytochrome P450 71A4                             | 4  | 6 | 0  | 0  | 4 | 1 | 0 | 0 | 0 | 0  | 0 | 15 |
| PGSC0003DMG400015156 | Conserved gene of unknown function               | 7  | 1 | 0  | 0  | 3 | 1 | 0 | 0 | 0 | 2  | 1 | 15 |
| PGSC0003DMG400015275 | Aquaporin, MIP family, TIP subfamily             | 3  | 0 | 4  | 0  | 0 | 0 | 0 | 0 | 0 | 2  | 6 | 15 |
| PGSC0003DMG400024619 | Conserved gene of unknown function               | 2  | 1 | 0  | 0  | 6 | 0 | 0 | 0 | 0 | 2  | 4 | 15 |
| PGSC0003DMG400018141 | Cytochrome P450 71A4                             | 8  | 3 | 0  | 0  | 0 | 0 | 0 | 0 | 0 | 3  | 1 | 15 |
| PGSC0003DMG400024658 | Excision repair cross-complementing 1 ercc1      | 2  | 2 | 0  | 3  | 0 | 2 | 0 | 0 | 0 | 2  | 5 | 16 |

|                      |                                                            |    |    |    |    |   |   |   |   |   |    |   |    |
|----------------------|------------------------------------------------------------|----|----|----|----|---|---|---|---|---|----|---|----|
| PGSC0003DMG400024522 | Conserved gene of unknown function                         | 0  | 8  | 8  | 0  | 0 | 0 | 0 | 0 | 0 | 0  | 0 | 16 |
| PGSC0003DMG400000611 | Pentatricopeptide repeat-containing protein                | 3  | 2  | 0  | 0  | 0 | 0 | 0 | 0 | 0 | 10 | 1 | 16 |
| PGSC0003DMG400024611 | Conserved gene of unknown function                         | 7  | 5  | 0  | 1  | 3 | 0 | 0 | 0 | 0 | 0  | 0 | 16 |
| PGSC0003DMG400036195 | Gene of unknown function                                   | 2  | 5  | 0  | 9  | 0 | 0 | 0 | 0 | 0 | 0  | 0 | 16 |
| PGSC0003DMG400018095 | Conserved gene of unknown function                         | 3  | 1  | 0  | 0  | 5 | 0 | 0 | 0 | 0 | 7  | 0 | 16 |
| PGSC0003DMG403015244 | Brg-1 associated factor                                    | 0  | 5  | 0  | 7  | 0 | 0 | 0 | 0 | 0 | 1  | 3 | 16 |
| PGSC0003DMG402024517 | Pentatricopeptide repeat-containing protein                | 6  | 7  | 0  | 0  | 0 | 0 | 0 | 0 | 0 | 0  | 3 | 16 |
| PGSC0003DMG400024470 | F-box and wd40 domain protein                              | 2  | 9  | 0  | 0  | 0 | 0 | 0 | 0 | 0 | 2  | 3 | 16 |
| PGSC0003DMG400015217 | F-box protein interaction domain containing protein        | 6  | 9  | 0  | 1  | 0 | 0 | 0 | 0 | 0 | 0  | 0 | 16 |
| PGSC0003DMG400019520 | Conserved gene of unknown function                         | 1  | 3  | 0  | 0  | 0 | 0 | 0 | 0 | 0 | 6  | 6 | 16 |
| PGSC0003DMG400019525 | MADS-box family protein                                    | 3  | 2  | 11 | 0  | 0 | 0 | 0 | 0 | 0 | 0  | 0 | 16 |
| PGSC0003DMG400034404 | Gene of unknown function                                   | 6  | 10 | 0  | 0  | 0 | 0 | 0 | 0 | 0 | 0  | 0 | 16 |
| PGSC0003DMG400026480 | Mitotic-spindle organizing protein 1B                      | 0  | 3  | 0  | 0  | 0 | 2 | 0 | 0 | 0 | 3  | 8 | 16 |
| PGSC0003DMG400019859 | Nuclear transcription factor, X-box binding                | 4  | 3  | 7  | 0  | 0 | 2 | 0 | 0 | 0 | 0  | 0 | 16 |
| PGSC0003DMG400024471 | Ubiquitin-protein ligase                                   | 6  | 3  | 0  | 0  | 0 | 0 | 0 | 0 | 0 | 3  | 4 | 16 |
| PGSC0003DMG400024476 | Heat-shock protein                                         | 1  | 3  | 0  | 0  | 0 | 0 | 0 | 0 | 0 | 12 | 0 | 16 |
| PGSC0003DMG400015228 | Peptide methionine sulfoxide reductase                     | 4  | 1  | 0  | 0  | 0 | 0 | 1 | 0 | 0 | 9  | 1 | 16 |
| PGSC0003DMG400024562 | Conserved gene of unknown function                         | 2  | 4  | 0  | 0  | 0 | 0 | 0 | 0 | 0 | 9  | 2 | 17 |
| PGSC0003DMG401024557 | Carbamoyl phosphate synthase small subunit                 | 3  | 1  | 0  | 10 | 0 | 1 | 0 | 0 | 0 | 2  | 0 | 17 |
| PGSC0003DMG400024501 | Kinesin light chain                                        | 13 | 1  | 0  | 0  | 0 | 0 | 0 | 0 | 0 | 3  | 0 | 17 |
| PGSC0003DMG400000614 | Phospholipase PLDa1                                        | 4  | 2  | 0  | 0  | 0 | 0 | 0 | 0 | 0 | 8  | 3 | 17 |
| PGSC0003DMG400018086 | Ubiquitin-protein ligase                                   | 8  | 9  | 0  | 0  | 0 | 0 | 0 | 0 | 0 | 0  | 0 | 17 |
| PGSC0003DMG400018092 | Myb family transcription factor                            | 5  | 4  | 0  | 8  | 0 | 0 | 0 | 0 | 0 | 0  | 0 | 17 |
| PGSC0003DMG400019823 | Conserved gene of unknown function                         | 1  | 2  | 0  | 7  | 0 | 1 | 0 | 0 | 0 | 6  | 0 | 17 |
| PGSC0003DMG400015254 | Nucleoside diphosphate kinase 2, chloroplastic             | 5  | 0  | 12 | 0  | 0 | 0 | 0 | 0 | 0 | 0  | 0 | 17 |
| PGSC0003DMG400024599 | Polygalacturonase-1 non-catalytic subunit beta             | 12 | 5  | 0  | 0  | 0 | 0 | 0 | 0 | 0 | 0  | 0 | 17 |
| PGSC0003DMG402031037 | Kinase family protein                                      | 0  | 1  | 14 | 0  | 2 | 0 | 0 | 0 | 0 | 0  | 0 | 17 |
| PGSC0003DMG400004337 | MTN3                                                       | 1  | 2  | 4  | 0  | 1 | 0 | 0 | 0 | 0 | 9  | 0 | 17 |
| PGSC0003DMG400026479 | Metal ion binding protein                                  | 2  | 1  | 0  | 0  | 6 | 1 | 0 | 0 | 0 | 2  | 5 | 17 |
| PGSC0003DMG400018091 | Nucleic acid binding protein                               | 3  | 0  | 7  | 0  | 5 | 0 | 0 | 0 | 0 | 2  | 0 | 17 |
| PGSC0003DMG400018078 | Ubiquitin-protein ligase                                   | 4  | 11 | 0  | 0  | 0 | 0 | 0 | 0 | 0 | 1  | 1 | 17 |
| PGSC0003DMG402024473 | Gene of unknown function                                   | 2  | 1  | 0  | 9  | 0 | 1 | 0 | 0 | 0 | 1  | 3 | 17 |
| PGSC0003DMG400015213 | Conserved gene of unknown function                         | 3  | 2  | 0  | 11 | 0 | 0 | 0 | 0 | 0 | 1  | 0 | 17 |
| PGSC0003DMG400031732 | ATP binding                                                | 3  | 0  | 7  | 0  | 3 | 1 | 0 | 0 | 0 | 3  | 0 | 17 |
| PGSC0003DMG400025628 | Pyridoxal-dependent decarboxylase, C-terminal sheet domain | 8  | 5  | 0  | 0  | 0 | 0 | 0 | 0 | 0 | 0  | 4 | 17 |
| PGSC0003DMG400024498 | UPF0497 membrane protein                                   | 1  | 0  | 0  | 0  | 0 | 1 | 0 | 0 | 0 | 15 | 1 | 18 |
| PGSC0003DMG400015196 | Conserved gene of unknown function                         | 12 | 4  | 0  | 0  | 0 | 0 | 1 | 0 | 0 | 1  | 0 | 18 |
| PGSC0003DMG400018077 | Conserved gene of unknown function                         | 6  | 11 | 0  | 0  | 0 | 0 | 1 | 0 | 0 | 0  | 0 | 18 |
| PGSC0003DMG400015160 | KDEL-tailed cysteine endopeptidase                         | 4  | 1  | 0  | 0  | 0 | 0 | 1 | 0 | 0 | 11 | 1 | 18 |
| PGSC0003DMG400018161 | Ubiquitin carrier protein                                  | 1  | 0  | 6  | 8  | 0 | 1 | 0 | 1 | 0 | 1  | 0 | 18 |
| PGSC0003DMG400000619 | Nucleosome-binding protein                                 | 1  | 7  | 0  | 1  | 0 | 0 | 0 | 0 | 0 | 3  | 6 | 18 |
| PGSC0003DMG400000627 | AtEB1b                                                     | 1  | 1  | 9  | 6  | 0 | 0 | 0 | 0 | 0 | 0  | 1 | 18 |
| PGSC0003DMG402031741 | UPA16                                                      | 3  | 3  | 0  | 0  | 7 | 0 | 0 | 0 | 0 | 4  | 1 | 18 |
| PGSC0003DMG400019507 | Expansin                                                   | 5  | 0  | 0  | 3  | 0 | 0 | 0 | 0 | 0 | 7  | 3 | 18 |

|                      |                                               |    |    |    |    |    |   |   |   |   |    |    |    |
|----------------------|-----------------------------------------------|----|----|----|----|----|---|---|---|---|----|----|----|
| PGSC0003DMG400024589 | Protein PRD1                                  | 5  | 5  | 0  | 0  | 7  | 0 | 0 | 0 | 0 | 0  | 1  | 18 |
| PGSC0003DMG400031742 | UPA16                                         | 3  | 2  | 0  | 0  | 13 | 0 | 0 | 0 | 0 | 0  | 0  | 18 |
| PGSC0003DMG400014208 | Inorganic pyrophosphatase                     | 7  | 0  | 0  | 8  | 0  | 0 | 0 | 0 | 0 | 2  | 1  | 18 |
| PGSC0003DMG400033684 | CycO7                                         | 4  | 0  | 9  | 0  | 0  | 2 | 0 | 0 | 0 | 2  | 1  | 18 |
| PGSC0003DMG400024538 | Basic 7S globulin 2 small subunit             | 5  | 13 | 0  | 0  | 0  | 0 | 0 | 0 | 0 | 0  | 0  | 18 |
| PGSC0003DMG400018163 | Serine-threonine protein kinase, plant-type   | 7  | 6  | 0  | 0  | 0  | 0 | 0 | 0 | 0 | 3  | 2  | 18 |
| PGSC0003DMG402000617 | Gene of unknown function                      | 2  | 1  | 0  | 0  | 0  | 0 | 0 | 0 | 0 | 14 | 1  | 18 |
| PGSC0003DMG400033696 | MAPKK                                         | 8  | 4  | 0  | 0  | 0  | 0 | 0 | 0 | 0 | 0  | 6  | 18 |
| PGSC0003DMG400024628 | COBRA 3                                       | 1  | 3  | 0  | 14 | 0  | 0 | 0 | 0 | 0 | 0  | 0  | 18 |
| PGSC0003DMG400015150 | Cytochrome P450 71A4                          | 11 | 7  | 1  | 0  | 0  | 0 | 0 | 0 | 0 | 0  | 0  | 19 |
| PGSC0003DMG401019533 | Gip1                                          | 1  | 0  | 17 | 0  | 0  | 0 | 0 | 0 | 0 | 0  | 1  | 19 |
| PGSC0003DMG400024577 | Actin binding protein                         | 9  | 8  | 0  | 1  | 0  | 0 | 0 | 0 | 0 | 0  | 1  | 19 |
| PGSC0003DMG400015176 | Gene of unknown function                      | 0  | 0  | 0  | 0  | 0  | 0 | 0 | 0 | 0 | 19 | 0  | 19 |
| PGSC0003DMG402024469 | E2F                                           | 2  | 0  | 8  | 6  | 0  | 0 | 0 | 0 | 0 | 3  | 0  | 19 |
| PGSC0003DMG400024487 | RNA binding protein                           | 9  | 3  | 0  | 3  | 0  | 0 | 0 | 0 | 0 | 3  | 1  | 19 |
| PGSC0003DMG400000639 | Delta 9 desaturase                            | 2  | 2  | 0  | 0  | 11 | 0 | 0 | 0 | 0 | 2  | 2  | 19 |
| PGSC0003DMG400031042 | Glutamate decarboxylase isoform1              | 3  | 1  | 0  | 7  | 0  | 0 | 0 | 0 | 0 | 2  | 6  | 19 |
| PGSC0003DMG400018165 | Heme-binding protein                          | 0  | 1  | 17 | 0  | 0  | 0 | 0 | 0 | 0 | 0  | 1  | 19 |
| PGSC0003DMG400024614 | Zinc finger protein                           | 5  | 3  | 9  | 0  | 0  | 0 | 0 | 0 | 0 | 1  | 1  | 19 |
| PGSC0003DMG400033691 | 50S ribosomal protein L29, chloroplastic      | 0  | 1  | 15 | 1  | 0  | 0 | 0 | 0 | 0 | 2  | 0  | 19 |
| PGSC0003DMG400025635 | Leucine rich repeat containing protein        | 0  | 1  | 0  | 4  | 0  | 1 | 0 | 0 | 0 | 0  | 13 | 19 |
| PGSC0003DMG401018164 | EMB2759                                       | 0  | 1  | 0  | 17 | 1  | 0 | 0 | 0 | 0 | 0  | 0  | 19 |
| PGSC0003DMG400000620 | Stellacyanin CASLP1                           | 2  | 8  | 0  | 4  | 0  | 0 | 0 | 0 | 0 | 3  | 2  | 19 |
| PGSC0003DMG400024636 | Presenilin                                    | 9  | 4  | 0  | 0  | 0  | 0 | 0 | 0 | 0 | 2  | 5  | 20 |
| PGSC0003DMG400024558 | Eukaryotic translation initiation factor 5A-5 | 0  | 0  | 13 | 0  | 0  | 0 | 0 | 0 | 0 | 6  | 1  | 20 |
| PGSC0003DMG400018094 | Ribosomal protein L41                         | 1  | 0  | 0  | 8  | 5  | 0 | 0 | 0 | 0 | 6  | 0  | 20 |
| PGSC0003DMG400014191 | 60S ribosomal protein L7                      | 1  | 0  | 0  | 18 | 0  | 0 | 0 | 0 | 0 | 1  | 0  | 20 |
| PGSC0003DMG400019523 | NAC domain-containing protein 21/22           | 4  | 1  | 0  | 0  | 1  | 0 | 0 | 0 | 0 | 14 | 0  | 20 |
| PGSC0003DMG400014131 | Leucine-rich repeat family protein            | 2  | 6  | 0  | 0  | 0  | 0 | 2 | 0 | 0 | 10 | 0  | 20 |
| PGSC0003DMG400037321 | UPF0497 membrane protein                      | 1  | 9  | 0  | 0  | 10 | 0 | 0 | 0 | 0 | 0  | 0  | 20 |
| PGSC0003DMG400018120 | TRANSPARENT TESTA 12 protein                  | 0  | 5  | 0  | 15 | 0  | 0 | 0 | 0 | 0 | 0  | 0  | 20 |
| PGSC0003DMG400014125 | Conserved gene of unknown function            | 3  | 2  | 0  | 7  | 0  | 1 | 0 | 0 | 0 | 1  | 6  | 20 |
| PGSC0003DMG400000636 | AP2 transcription factor                      | 10 | 1  | 6  | 0  | 0  | 2 | 0 | 0 | 0 | 0  | 1  | 20 |
| PGSC0003DMG402031036 | Aldo-keto reductase                           | 8  | 6  | 0  | 6  | 0  | 0 | 0 | 0 | 0 | 0  | 0  | 20 |
| PGSC0003DMG400015183 | Cytochrome P450                               | 12 | 3  | 0  | 0  | 0  | 0 | 0 | 1 | 0 | 1  | 3  | 20 |
| PGSC0003DMG400018149 | Iron-sulfer cluster scaffold protein ISU1     | 0  | 0  | 0  | 16 | 0  | 0 | 0 | 0 | 0 | 3  | 1  | 20 |
| PGSC0003DMG400033690 | Conserved gene of unknown function            | 1  | 0  | 0  | 15 | 0  | 0 | 0 | 0 | 0 | 4  | 0  |    |

|                      |                                                     |    |    |    |    |    |   |   |   |   |    |    |    |
|----------------------|-----------------------------------------------------|----|----|----|----|----|---|---|---|---|----|----|----|
| PGSC0003DMG402015202 | Reverse transcriptase family member                 | 0  | 0  | 0  | 0  | 0  | 0 | 0 | 0 | 0 | 11 | 10 | 21 |
| PGSC0003DMG400018136 | Cytochrome P450 71A2                                | 8  | 1  | 0  | 0  | 0  | 0 | 0 | 0 | 0 | 7  | 6  | 22 |
| PGSC0003DMG400024485 | Serine-threonine protein kinase, plant-type         | 5  | 8  | 0  | 9  | 0  | 0 | 0 | 0 | 0 | 0  | 0  | 22 |
| PGSC0003DMG400024566 | Conserved gene of unknown function                  | 4  | 1  | 0  | 0  | 0  | 0 | 0 | 0 | 0 | 12 | 5  | 22 |
| PGSC0003DMG400018114 | ATFRO8/FRO8                                         | 7  | 8  | 0  | 1  | 0  | 0 | 1 | 0 | 0 | 4  | 1  | 22 |
| PGSC0003DMG400031738 | UPA16                                               | 8  | 4  | 0  | 0  | 10 | 0 | 0 | 0 | 0 | 0  | 0  | 22 |
| PGSC0003DMG400024482 | Pentatricopeptide repeat protein                    | 6  | 4  | 0  | 0  | 0  | 0 | 1 | 0 | 0 | 8  | 3  | 22 |
| PGSC0003DMG400019528 | Dof zinc finger protein                             | 6  | 5  | 0  | 5  | 0  | 1 | 0 | 0 | 0 | 3  | 2  | 22 |
| PGSC0003DMG400018131 | CYP71AU1                                            | 15 | 3  | 0  | 0  | 0  | 0 | 0 | 0 | 0 | 2  | 2  | 22 |
| PGSC0003DMG400018140 | Cytochrome P450 71A4                                | 12 | 7  | 0  | 3  | 0  | 0 | 0 | 0 | 0 | 0  | 0  | 22 |
| PGSC0003DMG401031037 | ATP binding protein                                 | 8  | 8  | 0  | 6  | 0  | 0 | 0 | 0 | 0 | 0  | 0  | 22 |
| PGSC0003DMG402018164 | Protein MODIFIER OF SNC1 1                          | 3  | 6  | 0  | 0  | 7  | 1 | 0 | 0 | 0 | 4  | 1  | 22 |
| PGSC0003DMG400034843 | Gene of unknown function                            | 7  | 13 | 0  | 0  | 0  | 0 | 2 | 0 | 0 | 0  | 0  | 22 |
| PGSC0003DMG400024644 | 101 kDa heat shock protein                          | 7  | 2  | 8  | 0  | 0  | 0 | 0 | 0 | 0 | 4  | 1  | 22 |
| PGSC0003DMG400015185 | Cytochrome P450                                     | 9  | 6  | 0  | 0  | 0  | 0 | 0 | 0 | 0 | 6  | 1  | 22 |
| PGSC0003DMG400018182 | Ring finger protein                                 | 6  | 3  | 0  | 0  | 0  | 0 | 0 | 0 | 0 | 7  | 6  | 22 |
| PGSC0003DMG400018190 | Elongation factor TuA, chloroplastic                | 12 | 4  | 0  | 0  | 0  | 0 | 0 | 0 | 0 | 4  | 2  | 22 |
| PGSC0003DMG400018090 | F-box family protein                                | 9  | 2  | 0  | 0  | 6  | 0 | 1 | 0 | 0 | 4  | 0  | 22 |
| PGSC0003DMG400015262 | Heat shock protein binding protein                  | 3  | 19 | 0  | 0  | 0  | 0 | 0 | 0 | 0 | 0  | 0  | 22 |
| PGSC0003DMG400015299 | Gene of unknown function                            | 0  | 3  | 0  | 0  | 0  | 0 | 0 | 0 | 0 | 19 | 0  | 22 |
| PGSC0003DMG400015151 | Cytochrome P450                                     | 5  | 3  | 0  | 0  | 12 | 0 | 0 | 0 | 0 | 2  | 0  | 22 |
| PGSC0003DMG400024629 | Pentatricopeptide repeat-containing protein         | 13 | 9  | 0  | 0  | 0  | 0 | 0 | 0 | 0 | 0  | 0  | 22 |
| PGSC0003DMG400045825 | Gene of unknown function                            | 10 | 13 | 0  | 0  | 0  | 0 | 0 | 0 | 0 | 0  | 0  | 23 |
| PGSC0003DMG400018113 | R2r3-myb transcription factor                       | 3  | 8  | 2  | 0  | 0  | 0 | 0 | 0 | 0 | 10 | 0  | 23 |
| PGSC0003DMG400018118 | MATE efflux family protein                          | 8  | 2  | 11 | 0  | 0  | 2 | 0 | 0 | 0 | 0  | 0  | 23 |
| PGSC0003DMG402024557 | Conserved gene of unknown function                  | 2  | 0  | 0  | 12 | 0  | 0 | 0 | 0 | 0 | 1  | 8  | 23 |
| PGSC0003DMG400015249 | 3-oxoacyl-(Acyl-carrier protein) reductase          | 0  | 5  | 15 | 0  | 0  | 3 | 0 | 0 | 0 | 0  | 0  | 23 |
| PGSC0003DMG400024464 | Conserved gene of unknown function                  | 9  | 5  | 0  | 1  | 0  | 0 | 0 | 0 | 0 | 6  | 2  | 23 |
| PGSC0003DMG400015271 | P40                                                 | 7  | 3  | 0  | 13 | 0  | 0 | 0 | 0 | 0 | 0  | 0  | 23 |
| PGSC0003DMG400015194 | Malate synthase                                     | 4  | 6  | 5  | 0  | 4  | 0 | 0 | 0 | 0 | 3  | 1  | 23 |
| PGSC0003DMG400025634 | F-box protein interaction domain containing protein | 9  | 12 | 0  | 2  | 0  | 0 | 0 | 0 | 0 | 0  | 0  | 23 |
| PGSC0003DMG400015274 | DNA binding protein                                 | 5  | 8  | 0  | 8  | 0  | 0 | 0 | 0 | 0 | 0  | 2  | 23 |
| PGSC0003DMG400024527 | LIGULELESS1 protein                                 | 3  | 3  | 3  | 0  | 9  | 0 | 0 | 0 | 0 | 3  | 2  | 23 |
| PGSC0003DMG400010137 | Cysteine protease inhibitor 1                       | 3  | 19 | 0  | 0  | 0  | 0 | 0 | 0 | 0 | 1  | 0  | 23 |
| PGSC0003DMG400018109 | Raffionse synthase 2                                | 10 | 4  | 0  | 3  | 0  | 0 | 0 | 0 | 0 | 6  | 0  | 23 |
| PGSC0003DMG400010132 | Conserved gene of unknown function                  | 6  | 14 | 0  | 0  | 0  | 0 | 0 | 0 | 0 | 0  | 3  | 23 |
| PGSC0003DMG400024608 | Senescence-associated protein                       | 2  | 7  | 0  | 0  | 9  | 2 | 1 | 0 | 0 | 3  | 0  | 24 |
| PGSC0003DMG400019502 | Vesicle transport v-SNARE 11                        | 0  | 0  | 18 | 4  | 0  | 0 | 0 | 0 | 0 | 1  | 1  | 24 |
| PGSC0003DMG400018119 | TRANSPARENT TESTA 12 protein                        | 14 | 5  | 0  | 0  | 3  | 2 | 0 | 0 | 0 | 0  | 0  | 24 |
| PGSC0003DMG400025339 | Nitrate transporter                                 | 9  | 5  | 0  | 3  | 0  | 0 | 0 | 0 | 0 | 7  | 0  | 24 |
| PGSC0003DMG400018184 | Carbohydrate binding protein                        | 8  | 6  | 0  | 0  | 0  | 0 | 0 | 0 | 0 | 7  | 3  | 24 |
| PGSC0003DMG400045225 | Gene of unknown function                            | 12 | 11 | 0  | 0  | 0  | 0 | 1 | 0 | 0 | 0  | 0  | 24 |
| PGSC0003DMG400004332 | NAC domain protein                                  | 1  | 8  | 0  | 7  | 6  | 0 | 0 | 0 | 0 | 1  | 1  | 24 |
| PGSC0003DMG400026494 | Palmitoyl-acyl carrier protein thioesterase         | 6  | 1  | 0  | 0  | 15 | 0 | 0 | 0 | 0 | 2  | 0  | 24 |

|                      |                                                          |    |    |    |    |    |   |   |   |   |    |    |    |
|----------------------|----------------------------------------------------------|----|----|----|----|----|---|---|---|---|----|----|----|
| PGSC0003DMG400024481 | Pollen specific LIM domain-containing protein            | 0  | 1  | 0  | 17 | 0  | 0 | 0 | 0 | 0 | 3  | 3  | 24 |
| PGSC0003DMG402010181 | Xyloglucan endotransglucosylase/hydrolase protein 9      | 3  | 2  | 0  | 12 | 0  | 1 | 0 | 0 | 0 | 1  | 5  | 24 |
| PGSC0003DMG400015235 | Ubiquitin-protein ligase                                 | 3  | 1  | 3  | 0  | 14 | 0 | 0 | 0 | 0 | 3  | 0  | 24 |
| PGSC0003DMG400013182 | LOB domain-containing protein                            | 4  | 2  | 18 | 0  | 0  | 0 | 0 | 0 | 0 | 0  | 0  | 24 |
| PGSC0003DMG400000599 | DNA-binding protein                                      | 0  | 1  | 12 | 0  | 0  | 0 | 0 | 0 | 0 | 9  | 2  | 24 |
| PGSC0003DMG402014189 | XH/XS domain-containing protein                          | 2  | 2  | 0  | 18 | 0  | 0 | 0 | 0 | 0 | 1  | 1  | 24 |
| PGSC0003DMG400025346 | Voltage-dependent anion channel                          | 7  | 7  | 0  | 0  | 0  | 2 | 0 | 0 | 0 | 4  | 4  | 24 |
| PGSC0003DMG400000596 | Flavonol synthase/flavanone 3-hydroxylase                | 3  | 2  | 15 | 0  | 0  | 0 | 0 | 0 | 0 | 2  | 2  | 24 |
| PGSC0003DMG401024548 | Leucine-rich repeat containing protein                   | 2  | 4  | 7  | 5  | 0  | 0 | 0 | 0 | 0 | 0  | 6  | 24 |
| PGSC0003DMG400024461 | Conserved gene of unknown function                       | 8  | 3  | 0  | 11 | 0  | 0 | 0 | 0 | 0 | 2  | 0  | 24 |
| PGSC0003DMG400000640 | Conserved gene of unknown function                       | 0  | 2  | 0  | 12 | 0  | 0 | 0 | 0 | 0 | 6  | 4  | 24 |
| PGSC0003DMG400015232 | Pentatricopeptide repeat-containing protein              | 10 | 7  | 0  | 5  | 0  | 0 | 1 | 0 | 0 | 1  | 0  | 24 |
| PGSC0003DMG400024667 | Glycosyltransferase                                      | 8  | 4  | 4  | 0  | 0  | 0 | 0 | 0 | 0 | 6  | 2  | 24 |
| PGSC0003DMG400024475 | Calmodulin binding protein                               | 2  | 4  | 0  | 0  | 14 | 0 | 0 | 0 | 0 | 3  | 2  | 25 |
| PGSC0003DMG400034990 | F-box protein interaction domain containing protein      | 3  | 21 | 0  | 0  | 0  | 0 | 1 | 0 | 0 | 0  | 0  | 25 |
| PGSC0003DMG400018154 | Conserved gene of unknown function                       | 2  | 0  | 17 | 0  | 0  | 0 | 0 | 0 | 0 | 4  | 2  | 25 |
| PGSC0003DMG400000644 | Phox domain-containing protein                           | 3  | 3  | 9  | 8  | 1  | 1 | 0 | 0 | 0 | 0  | 0  | 25 |
| PGSC0003DMG400019519 | Exonuclease                                              | 0  | 3  | 0  | 10 | 0  | 0 | 0 | 0 | 0 | 11 | 1  | 25 |
| PGSC0003DMG400025631 | F-box protein interaction domain containing protein      | 6  | 14 | 5  | 0  | 0  | 0 | 0 | 0 | 0 | 0  | 0  | 25 |
| PGSC0003DMG400024528 | Transposase Tam3                                         | 8  | 12 | 0  | 0  | 0  | 1 | 0 | 0 | 0 | 2  | 2  | 25 |
| PGSC0003DMG400031057 | Serine palmitoyltransferase                              | 3  | 0  | 0  | 0  | 19 | 1 | 0 | 0 | 0 | 1  | 1  | 25 |
| PGSC0003DMG400018177 | Pentatricopeptide repeat-containing protein              | 6  | 7  | 0  | 0  | 0  | 0 | 0 | 0 | 0 | 7  | 5  | 25 |
| PGSC0003DMG400014141 | DEAD-box protein abstrakt                                | 4  | 0  | 0  | 8  | 0  | 0 | 0 | 0 | 0 | 6  | 7  | 25 |
| PGSC0003DMG401019826 | Nucleic acid binding protein                             | 3  | 5  | 0  | 10 | 7  | 0 | 0 | 0 | 0 | 0  | 0  | 25 |
| PGSC0003DMG400024569 | Rhcadhesin receptor                                      | 10 | 3  | 0  | 0  | 0  | 0 | 0 | 0 | 0 | 10 | 3  | 26 |
| PGSC0003DMG400019532 | Conserved gene of unknown function                       | 6  | 4  | 6  | 0  | 0  | 0 | 0 | 0 | 0 | 9  | 1  | 26 |
| PGSC0003DMG400024639 | Histone deacetylase                                      | 5  | 4  | 17 | 0  | 0  | 0 | 0 | 0 | 0 | 0  | 0  | 26 |
| PGSC0003DMG400018104 | Cell division cycle protein 48                           | 13 | 2  | 0  | 6  | 0  | 0 | 0 | 0 | 0 | 0  | 5  | 26 |
| PGSC0003DMG400042259 | Steroleosin                                              | 3  | 9  | 11 | 0  | 0  | 3 | 0 | 0 | 0 | 0  | 0  | 26 |
| PGSC0003DMG400024638 | ATP synthase subunit gamma, mitochondrial                | 1  | 0  | 0  | 8  | 13 | 0 | 0 | 0 | 0 | 2  | 2  | 26 |
| PGSC0003DMG400015170 | ATP binding protein                                      | 1  | 2  | 0  | 2  | 0  | 1 | 1 | 0 | 0 | 5  | 14 | 26 |
| PGSC0003DMG400015187 | Adenylate kinase B                                       | 0  | 0  | 0  | 19 | 0  | 1 | 0 | 0 | 0 | 6  | 0  | 26 |
| PGSC0003DMG400033683 | Dehydrogenase                                            | 4  | 1  | 0  | 19 | 0  | 0 | 0 | 0 | 0 | 0  | 2  | 26 |
| PGSC0003DMG400024660 | HCG23534, partial                                        | 2  | 2  | 22 | 0  | 0  | 0 | 0 | 0 | 0 | 0  | 0  | 26 |
| PGSC0003DMG401018151 | Pre-mRNA-splicing factor cwc23                           | 1  | 1  | 0  | 22 | 0  | 0 | 1 | 0 | 0 | 0  | 1  | 26 |
| PGSC0003DMG400018101 | BRASSINOSTEROID INSENSITIVE 1-associated receptor kinase | 6  | 10 | 5  | 0  | 0  | 1 | 1 | 0 | 0 | 1  | 2  | 26 |
| PGSC0003DMG400012026 | Conserved gene of unknown function                       | 3  | 4  | 0  | 0  | 11 | 1 |   |   |   |    |    |    |

|                      |                                                 |    |    |    |    |    |   |   |   |   |    |    |    |
|----------------------|-------------------------------------------------|----|----|----|----|----|---|---|---|---|----|----|----|
| PGSC0003DMG400033688 | Tartrate-resistant acid phosphatase type 5      | 2  | 3  | 8  | 10 | 0  | 1 | 1 | 0 | 0 | 2  | 0  | 27 |
| PGSC0003DMG402024549 | ATP binding protein                             | 2  | 5  | 15 | 0  | 0  | 0 | 0 | 0 | 0 | 3  | 2  | 27 |
| PGSC0003DMG400024537 | Basic 7S globulin 2 small subunit               | 10 | 6  | 0  | 0  | 0  | 0 | 0 | 0 | 0 | 10 | 1  | 27 |
| PGSC0003DMG400019821 | Cyclic nucleotide-gated ion channel             | 3  | 0  | 23 | 0  | 0  | 1 | 0 | 0 | 0 | 0  | 0  | 27 |
| PGSC0003DMG400018157 | Glutaredoxin                                    | 0  | 1  | 0  | 24 | 0  | 0 | 0 | 0 | 0 | 2  | 0  | 27 |
| PGSC0003DMG400041939 | Ubiquitin-protein ligase                        | 10 | 17 | 0  | 0  | 0  | 0 | 0 | 0 | 0 | 0  | 0  | 27 |
| PGSC0003DMG400015157 | Receptor kinase                                 | 14 | 9  | 0  | 0  | 0  | 0 | 0 | 0 | 0 | 3  | 1  | 27 |
| PGSC0003DMG400039684 | Gene of unknown function                        | 7  | 20 | 0  | 0  | 0  | 0 | 0 | 0 | 0 | 0  | 0  | 27 |
| PGSC0003DMG400024539 | ATEXO70E2                                       | 5  | 11 | 0  | 0  | 0  | 0 | 0 | 0 | 0 | 6  | 6  | 28 |
| PGSC0003DMG400025632 | Myb-like DNA-binding protein                    | 2  | 4  | 6  | 0  | 13 | 0 | 0 | 0 | 0 | 3  | 0  | 28 |
| PGSC0003DMG400015177 | CONSTANS interacting protein 2a                 | 3  | 2  | 0  | 23 | 0  | 0 | 0 | 0 | 0 | 0  | 0  | 28 |
| PGSC0003DMG400015169 | Esterase                                        | 4  | 5  | 0  | 14 | 0  | 0 | 0 | 0 | 0 | 1  | 4  | 28 |
| PGSC0003DMG400014192 | Mitochondrial glycoprotein family protein       | 3  | 3  | 10 | 0  | 0  | 0 | 0 | 0 | 0 | 12 | 0  | 28 |
| PGSC0003DMG400024551 | Conserved gene of unknown function              | 5  | 10 | 0  | 0  | 0  | 0 | 0 | 0 | 0 | 12 | 1  | 28 |
| PGSC0003DMG400015264 | Thylakoid lumenal 17.9 kDa protein, chloroplast | 1  | 0  | 17 | 0  | 0  | 0 | 0 | 0 | 0 | 6  | 4  | 28 |
| PGSC0003DMG400026483 | HVA22 e                                         | 0  | 0  | 0  | 0  | 28 | 0 | 0 | 0 | 0 | 0  | 0  | 28 |
| PGSC0003DMG400033693 | UPA16                                           | 1  | 2  | 23 | 0  | 0  | 0 | 0 | 0 | 0 | 2  | 0  | 28 |
| PGSC0003DMG400015198 | Amino acid transporter                          | 5  | 2  | 7  | 13 | 0  | 1 | 0 | 0 | 0 | 0  | 0  | 28 |
| PGSC0003DMG400024633 | Conserved gene of unknown function              | 2  | 5  | 0  | 4  | 0  | 0 | 1 | 0 | 0 | 14 | 2  | 28 |
| PGSC0003DMG400019514 | ATP binding protein                             | 2  | 4  | 9  | 0  | 9  | 0 | 0 | 0 | 0 | 4  | 0  | 28 |
| PGSC0003DMG400024593 | Glycosyltransferase UGT90A7                     | 8  | 14 | 0  | 0  | 0  | 0 | 0 | 0 | 0 | 0  | 6  | 28 |
| PGSC0003DMG401031045 | AGO1-1                                          | 2  | 2  | 4  | 14 | 0  | 0 | 0 | 0 | 0 | 1  | 6  | 29 |
| PGSC0003DMG400015192 | Malate synthase, glyoxysomal                    | 12 | 4  | 0  | 10 | 0  | 2 | 0 | 0 | 0 | 1  | 0  | 29 |
| PGSC0003DMG400024477 | Calmodulin binding protein                      | 5  | 16 | 0  | 2  | 0  | 0 | 0 | 0 | 0 | 3  | 3  | 29 |
| PGSC0003DMG400024521 | Gene of unknown function                        | 0  | 4  | 0  | 24 | 0  | 1 | 0 | 0 | 0 | 0  | 0  | 29 |
| PGSC0003DMG400015182 | Deoxycytidylate deaminase                       | 4  | 2  | 0  | 17 | 0  | 0 | 0 | 0 | 0 | 1  | 5  | 29 |
| PGSC0003DMG400024579 | Cell division cycle                             | 5  | 0  | 20 | 4  | 0  | 0 | 0 | 0 | 0 | 0  | 0  | 29 |
| PGSC0003DMG401024469 | Pentatricopeptide repeat-containing protein     | 3  | 1  | 0  | 0  | 0  | 0 | 0 | 0 | 0 | 25 | 0  | 29 |
| PGSC0003DMG400018160 | Conserved gene of unknown function              | 7  | 13 | 0  | 0  | 0  | 0 | 1 | 0 | 0 | 8  | 0  | 29 |
| PGSC0003DMG400025348 | Quirky                                          | 15 | 4  | 0  | 0  | 0  | 0 | 0 | 0 | 0 | 6  | 4  | 29 |
| PGSC0003DMG400015297 | Conserved gene of unknown function              | 0  | 1  | 0  | 0  | 0  | 0 | 0 | 0 | 0 | 17 | 11 | 29 |
| PGSC0003DMG402018159 | Ubiquitin carrier protein                       | 1  | 1  | 0  | 24 | 0  | 0 | 0 | 0 | 0 | 3  | 0  | 29 |
| PGSC0003DMG400024662 | Myosin heavy chain                              | 10 | 10 | 0  | 9  | 0  | 0 | 0 | 0 | 0 | 0  | 0  | 29 |
| PGSC0003DMG400015253 | Glyceraldehyde-3-phosphate dehydrogenase        | 5  | 0  | 0  | 19 | 0  | 2 | 0 | 0 | 0 | 4  | 0  | 30 |
| PGSC0003DMG400024458 | HIPL1 protein                                   | 8  | 7  | 14 | 0  | 0  | 1 | 0 | 0 | 0 | 0  | 0  | 30 |
| PGSC0003DMG400019524 | YGL010w                                         | 0  | 0  | 0  | 0  | 19 | 0 | 0 | 0 | 0 | 10 | 1  | 30 |
| PGSC0003DMG400015216 | CDT1a protein                                   | 2  | 3  | 15 | 0  | 8  | 0 | 0 | 0 | 0 | 2  | 0  | 30 |
| PGSC0003DMG401024517 | Protease                                        | 3  | 2  | 0  | 16 | 0  | 0 | 0 | 0 | 0 | 6  | 3  | 30 |
| PGSC0003DMG402015240 | Conserved gene of unknown function              | 3  | 0  | 0  | 17 | 0  | 1 | 0 | 0 | 0 | 3  | 6  | 30 |
| PGSC0003DMG400015280 | Conserved gene of unknown function              | 5  | 4  | 0  | 9  | 0  | 0 | 0 | 0 | 0 | 7  | 5  | 30 |
| PGSC0003DMG400019853 | Sterile alpha motif domain-containing protein   | 1  | 4  | 0  | 0  | 0  | 0 | 0 | 0 | 0 | 16 | 9  | 30 |
| PGSC0003DMG400019852 | Translocon-associated protein, beta subunit     | 6  | 2  | 0  | 15 | 0  | 0 | 0 | 0 | 0 | 8  | 0  | 31 |
| PGSC0003DMG400015212 | Serine/threonine-protein phosphatase            | 2  | 1  | 13 | 7  | 3  | 0 | 0 | 0 | 0 | 4  | 1  | 31 |
| PGSC0003DMG400033689 | Conserved gene of unknown function              | 3  | 0  | 0  | 18 | 0  | 0 | 0 | 0 | 0 | 8  | 2  | 31 |

|                      |                                                            |    |    |    |    |    |   |   |   |   |    |    |    |
|----------------------|------------------------------------------------------------|----|----|----|----|----|---|---|---|---|----|----|----|
| PGSC0003DMG400019858 | Pentatricopeptide repeat-containing protein                | 11 | 2  | 0  | 2  | 0  | 1 | 0 | 0 | 0 | 15 | 0  | 31 |
| PGSC0003DMG400019522 | Heat shock protein binding protein                         | 4  | 1  | 18 | 7  | 0  | 0 | 0 | 0 | 0 | 1  | 0  | 31 |
| PGSC0003DMG400015188 | Auxin-independent growth promoter                          | 10 | 6  | 0  | 11 | 0  | 3 | 0 | 0 | 0 | 1  | 0  | 31 |
| PGSC0003DMG400018115 | ATP binding protein                                        | 5  | 1  | 0  | 0  | 0  | 0 | 1 | 0 | 0 | 20 | 4  | 31 |
| PGSC0003DMG400000635 | Longin                                                     | 0  | 1  | 0  | 22 | 0  | 0 | 0 | 0 | 0 | 7  | 1  | 31 |
| PGSC0003DMG400010151 | ARC6H                                                      | 6  | 2  | 0  | 18 | 4  | 0 | 0 | 0 | 0 | 0  | 1  | 31 |
| PGSC0003DMG400015167 | Zinc finger protein                                        | 3  | 1  | 0  | 21 | 0  | 0 | 0 | 0 | 0 | 0  | 6  | 31 |
| PGSC0003DMG400024613 | Protein ASC1                                               | 9  | 3  | 3  | 0  | 0  | 0 | 0 | 0 | 0 | 10 | 7  | 32 |
| PGSC0003DMG400024459 | HIPL1 protein                                              | 8  | 6  | 0  | 0  | 12 | 1 | 0 | 0 | 0 | 5  | 0  | 32 |
| PGSC0003DMG400024640 | Zinc ion binding protein                                   | 10 | 8  | 0  | 0  | 13 | 0 | 1 | 0 | 0 | 0  | 0  | 32 |
| PGSC0003DMG400024632 | Transcription factor                                       | 9  | 4  | 9  | 3  | 0  | 3 | 1 | 0 | 0 | 2  | 1  | 32 |
| PGSC0003DMG401024590 | Rac protein                                                | 1  | 3  | 0  | 24 | 0  | 4 | 0 | 0 | 0 | 0  | 0  | 32 |
| PGSC0003DMG400026492 | Protein kinase family protein                              | 4  | 5  | 0  | 17 | 0  | 0 | 0 | 0 | 0 | 5  | 1  | 32 |
| PGSC0003DMG400018178 | Histone deacetylase                                        | 5  | 5  | 0  | 15 | 0  | 0 | 0 | 0 | 0 | 1  | 6  | 32 |
| PGSC0003DMG401024463 | DNA binding protein                                        | 3  | 5  | 12 | 0  | 0  | 1 | 0 | 0 | 0 | 0  | 11 | 32 |
| PGSC0003DMG400019827 | Nucleic acid binding protein                               | 0  | 3  | 1  | 0  | 28 | 0 | 0 | 0 | 0 | 0  | 0  | 32 |
| PGSC0003DMG400015225 | Transposase                                                | 2  | 13 | 16 | 0  | 0  | 0 | 1 | 0 | 0 | 0  | 0  | 32 |
| PGSC0003DMG400031044 | MYB transcription factor                                   | 2  | 2  | 0  | 0  | 24 | 3 | 0 | 0 | 0 | 1  | 0  | 32 |
| PGSC0003DMG400024648 | Expansin                                                   | 1  | 3  | 11 | 0  | 17 | 0 | 0 | 0 | 0 | 0  | 0  | 32 |
| PGSC0003DMG400000612 | AP2 domain-containing protein AP29                         | 6  | 2  | 0  | 0  | 0  | 0 | 0 | 0 | 0 | 5  | 20 | 33 |
| PGSC0003DMG403014139 | WD-repeat protein                                          | 1  | 1  | 0  | 0  | 0  | 0 | 0 | 0 | 0 | 1  | 30 | 33 |
| PGSC0003DMG400018127 | Protein DEHYDRATION-INDUCED 19 homolog 6                   | 4  | 7  | 5  | 0  | 0  | 2 | 0 | 0 | 0 | 11 | 4  | 33 |
| PGSC0003DMG400024508 | Extracellular Ca2+ sensing receptor                        | 3  | 2  | 0  | 23 | 0  | 2 | 0 | 0 | 0 | 1  | 2  | 33 |
| PGSC0003DMG400024484 | BAH domain-containing protein                              | 15 | 5  | 3  | 0  | 0  | 0 | 0 | 0 | 0 | 9  | 1  | 33 |
| PGSC0003DMG400019824 | JA-induced WRKY protein                                    | 5  | 4  | 0  | 14 | 0  | 0 | 0 | 0 | 0 | 9  | 1  | 33 |
| PGSC0003DMG402024603 | DR1                                                        | 5  | 6  | 0  | 0  | 0  | 0 | 2 | 0 | 0 | 0  | 20 | 33 |
| PGSC0003DMG400024624 | Conserved gene of unknown function                         | 2  | 0  | 0  | 22 | 0  | 1 | 0 | 0 | 0 | 3  | 5  | 33 |
| PGSC0003DMG400015263 | Nodulin                                                    | 3  | 0  | 0  | 21 | 0  | 0 | 0 | 0 | 0 | 1  | 8  | 33 |
| PGSC0003DMG400015229 | BTB/POZ domain-containing protein                          | 11 | 3  | 10 | 5  | 0  | 2 | 0 | 0 | 0 | 2  | 1  | 34 |
| PGSC0003DMG400015270 | ATP-binding cassette transporter                           | 6  | 4  | 0  | 15 | 0  | 2 | 0 | 0 | 0 | 2  | 5  | 34 |
| PGSC0003DMG400010153 | ARF-GAP domain 15                                          | 0  | 0  | 1  | 0  | 26 | 4 | 0 | 0 | 0 | 3  | 0  | 34 |
| PGSC0003DMG400014123 | Aquaporin, MIP family, NIP subfamily                       | 0  | 0  | 14 | 0  | 0  | 2 | 0 | 0 | 0 | 15 | 3  | 34 |
| PGSC0003DMG400024573 | Pentatricopeptide repeat-containing protein, chloroplastic | 11 | 5  | 6  | 0  | 5  | 1 | 0 | 0 | 0 | 4  | 2  | 34 |
| PGSC0003DMG400024601 | Dead box ATP-dependent RNA helicase                        | 5  | 2  | 8  | 8  | 7  | 3 | 0 | 0 | 0 | 1  | 1  | 35 |
| PGSC0003DMG400024596 | Protein kinase atmrk1                                      | 2  | 2  | 0  | 27 | 0  | 1 | 0 | 0 | 0 | 1  | 2  | 35 |
| PGSC0003DMG400012025 | UPF0497 membrane protein 8                                 | 0  | 1  | 34 | 0  | 0  | 0 | 0 | 0 | 0 | 0  | 0  | 35 |
| PGSC0003DMG400000608 | Polygalacturonase                                          | 2  | 3  | 9  | 0  | 8  | 0 | 0 | 0 | 0 | 13 | 0  | 35 |



|                      |                                             |    |    |    |    |    |   |   |   |   |    |    |    |
|----------------------|---------------------------------------------|----|----|----|----|----|---|---|---|---|----|----|----|
| PGSC0003DMG400000632 | Pentatricopeptide repeat-containing protein | 4  | 17 | 0  | 0  | 0  | 0 | 0 | 0 | 0 | 13 | 2  | 36 |
| PGSC0003DMG400010156 | Small nuclear ribonucleoprotein polypeptide | 1  | 0  | 1  | 34 | 0  | 0 | 0 | 0 | 0 | 0  | 0  | 36 |
| PGSC0003DMG402024581 | Mannose-1-phosphate guanylttransferase      | 1  | 3  | 5  | 20 | 0  | 0 | 0 | 0 | 0 | 2  | 5  | 36 |
| PGSC0003DMG400010188 | Gene of unknown function                    | 5  | 8  | 0  | 0  | 0  | 0 | 1 | 0 | 0 | 3  | 19 | 36 |
| PGSC0003DMG402024610 | Conserved gene of unknown function          | 9  | 7  | 13 | 0  | 0  | 1 | 0 | 0 | 0 | 6  | 0  | 36 |
| PGSC0003DMG400019829 | Nucleic acid binding protein                | 1  | 7  | 0  | 7  | 20 | 0 | 0 | 0 | 0 | 0  | 2  | 37 |
| PGSC0003DMG400015208 | Ser/Thr protein phosphatase family          | 0  | 5  | 5  | 18 | 0  | 0 | 0 | 0 | 0 | 1  | 8  | 37 |
| PGSC0003DMG400018100 | Homeobox 9                                  | 1  | 1  | 0  | 35 | 0  | 0 | 0 | 0 | 0 | 0  | 0  | 37 |
| PGSC0003DMG400015283 | Receptor kinase                             | 13 | 24 | 0  | 0  | 0  | 0 | 0 | 0 | 0 | 0  | 0  | 37 |
| PGSC0003DMG400010173 | Avr9/Cf-9 rapidly elicited protein 140      | 1  | 1  | 35 | 0  | 0  | 0 | 0 | 0 | 0 | 0  | 0  | 37 |
| PGSC0003DMG400018171 | Receptor protein kinase                     | 12 | 6  | 0  | 16 | 0  | 0 | 0 | 0 | 0 | 0  | 3  | 37 |
| PGSC0003DMG401000617 | Conserved gene of unknown function          | 3  | 4  | 14 | 0  | 0  | 0 | 0 | 0 | 0 | 15 | 1  | 37 |
| PGSC0003DMG400014134 | Conserved gene of unknown function          | 4  | 3  | 0  | 0  | 19 | 0 | 0 | 0 | 0 | 6  | 5  | 37 |
| PGSC0003DMG400015207 | Conserved gene of unknown function          | 5  | 3  | 8  | 0  | 18 | 0 | 0 | 0 | 0 | 3  | 0  | 37 |
| PGSC0003DMG400015162 | Nodulation receptor kinase                  | 6  | 3  | 0  | 21 | 0  | 0 | 0 | 0 | 0 | 1  | 6  | 37 |
| PGSC0003DMG400024641 | 24 kDa seed maturation protein              | 2  | 2  | 8  | 0  | 25 | 0 | 0 | 0 | 0 | 0  | 0  | 37 |
| PGSC0003DMG400015189 | Aspartyl aminopeptidase                     | 2  | 3  | 14 | 8  | 4  | 1 | 0 | 0 | 0 | 0  | 5  | 37 |
| PGSC0003DMG400004333 | Conserved gene of unknown function          | 1  | 6  | 13 | 0  | 17 | 0 | 0 | 0 | 0 | 0  | 0  | 37 |
| PGSC0003DMG402015205 | Protein yrdA                                | 2  | 0  | 14 | 0  | 16 | 2 | 0 | 0 | 0 | 3  | 1  | 38 |
| PGSC0003DMG401015209 | Conserved gene of unknown function          | 2  | 6  | 9  | 16 | 0  | 1 | 0 | 0 | 0 | 4  | 0  | 38 |
| PGSC0003DMG400024474 | Gonadotropin beta chain                     | 1  | 2  | 2  | 0  | 22 | 2 | 0 | 0 | 0 | 5  | 4  | 38 |
| PGSC0003DMG400018139 | Cytochrome P450 71A4                        | 11 | 15 | 0  | 4  | 0  | 1 | 1 | 0 | 0 | 2  | 4  | 38 |
| PGSC0003DMG400010133 | Sexual organ expressed protein              | 0  | 4  | 33 | 0  | 0  | 0 | 1 | 0 | 0 | 0  | 0  | 38 |
| PGSC0003DMG400031054 | Transcription factor                        | 2  | 1  | 15 | 19 | 0  | 1 | 0 | 0 | 0 | 0  | 0  | 38 |
| PGSC0003DMG402019860 | Glycosyl transferase family 29 protein      | 6  | 4  | 12 | 1  | 0  | 1 | 0 | 0 | 0 | 1  | 13 | 38 |
| PGSC0003DMG400024552 | Synaptosomal associated protein             | 4  | 2  | 0  | 30 | 0  | 1 | 0 | 0 | 0 | 1  | 0  | 38 |
| PGSC0003DMG401015202 | Histone acetyltransferase                   | 3  | 3  | 19 | 0  | 7  | 2 | 0 | 0 | 0 | 3  | 1  | 38 |
| PGSC0003DMG400018089 | Chromosome structural maintenance protein   | 8  | 4  | 0  | 20 | 0  | 0 | 0 | 0 | 0 | 1  | 5  | 38 |
| PGSC0003DMG402018151 | ATP binding protein                         | 2  | 3  | 0  | 28 | 0  | 0 | 1 | 0 | 0 | 2  | 2  | 38 |
| PGSC0003DMG400000616 | Conserved gene of unknown function          | 0  | 0  | 8  | 2  | 26 | 0 | 0 | 0 | 0 | 0  | 3  | 39 |
| PGSC0003DMG400015154 | Hydrolase, hydrolyzing O-glycosyl compounds | 7  | 4  | 0  | 8  | 0  | 0 | 1 | 0 | 0 | 9  | 10 | 39 |
| PGSC0003DMG400024561 | Ser/Thr protein kinase                      | 3  | 4  | 17 | 4  | 0  | 1 | 0 | 0 | 0 | 7  | 3  | 39 |
| PGSC0003DMG400024547 | Diacylglycerol kinase, theta                | 8  | 5  | 14 | 4  | 0  | 0 | 0 | 0 | 0 | 1  | 7  | 39 |
| PGSC0003DMG401004334 | Pyruvate dehydrogenase                      | 3  | 0  | 16 | 1  | 0  | 0 | 0 | 0 | 0 | 18 | 1  | 39 |
| PGSC0003DMG400024520 | Conserved gene of unknown function          | 3  | 0  | 28 | 0  | 0  | 1 | 0 | 0 | 0 | 5  | 2  | 39 |
| PGSC0003DMG400024591 | Cyclic nucleotide-gated ion channel 16      | 8  | 0  | 16 | 11 | 0  | 0 | 0 | 0 | 0 | 4  | 0  | 39 |
| PGSC0003DMG400019512 | Membrane associated ring finger 1, 8        | 0  | 1  | 0  | 0  | 0  | 0 | 0 | 0 | 0 | 34 | 4  | 39 |
| PGSC0003DMG401024549 | ATP binding protein                         | 4  | 6  | 0  | 19 | 0  | 0 | 0 | 0 | 0 | 7  | 3  | 39 |
| PGSC0003DMG400004340 | DNA binding protein                         | 5  | 3  | 0  | 12 | 17 | 0 | 0 | 0 | 0 | 0  | 2  | 39 |
| PGSC0003DMG401024472 | Endonuclease III                            | 3  | 6  | 0  | 29 | 0  | 0 | 0 | 0 | 0 | 1  | 1  | 40 |
| PGSC0003DMG400000642 | ATP binding protein                         | 2  | 3  | 0  | 0  | 30 | 0 | 0 | 0 | 0 | 3  | 2  | 40 |
| PGSC0003DMG400025334 | Nitrate transporter                         | 4  | 4  | 0  | 5  | 0  | 1 | 0 | 0 | 0 | 11 | 15 | 40 |
| PGSC0003DMG400018187 | Pentatricopeptide repeat-containing protein | 6  | 4  | 0  | 23 | 0  | 0 | 0 | 0 | 0 | 7  | 0  | 40 |
| PGSC0003DMG400000601 | ZR1 protein                                 | 1  | 3  | 22 | 0  | 7  | 0 | 0 | 0 | 0 | 5  | 2  | 40 |

|                      |                                                          |    |    |    |    |    |   |   |   |   |    |    |    |
|----------------------|----------------------------------------------------------|----|----|----|----|----|---|---|---|---|----|----|----|
| PGSC0003DMG400015171 | ATP binding protein                                      | 13 | 6  | 0  | 0  | 0  | 0 | 1 | 0 | 0 | 17 | 3  | 40 |
| PGSC0003DMG403024620 | BSD domain containing protein                            | 5  | 6  | 3  | 1  | 0  | 0 | 1 | 0 | 0 | 18 | 6  | 40 |
| PGSC0003DMG400024578 | Type-A response regulator                                | 1  | 2  | 0  | 4  | 1  | 0 | 0 | 0 | 0 | 27 | 5  | 40 |
| PGSC0003DMG400025330 | BRASSINOSTEROID INSENSITIVE 1-associated receptor kinase | 5  | 2  | 0  | 25 | 0  | 1 | 0 | 0 | 0 | 2  | 5  | 40 |
| PGSC0003DMG400015218 | F-box protein interaction domain containing protein      | 10 | 13 | 0  | 17 | 0  | 0 | 0 | 0 | 0 | 0  | 0  | 40 |
| PGSC0003DMG400018103 | Carboxyl-terminal proteinase                             | 1  | 0  | 0  | 34 | 0  | 1 | 0 | 0 | 0 | 2  | 2  | 40 |
| PGSC0003DMG400033680 | Protein SSU72                                            | 2  | 0  | 0  | 26 | 7  | 0 | 0 | 0 | 0 | 4  | 2  | 41 |
| PGSC0003DMG400014207 | Calcineurin                                              | 3  | 0  | 0  | 31 | 0  | 0 | 0 | 0 | 0 | 5  | 2  | 41 |
| PGSC0003DMG402015159 | Protein tipD                                             | 3  | 4  | 0  | 11 | 16 | 4 | 0 | 0 | 0 | 2  | 1  | 41 |
| PGSC0003DMG400024545 | Gene of unknown function                                 | 2  | 2  | 0  | 0  | 0  | 0 | 0 | 0 | 0 | 3  | 34 | 41 |
| PGSC0003DMG400018148 | ATPANK2 (PANTOTHENATE KINASE 2)                          | 1  | 3  | 9  | 0  | 23 | 0 | 0 | 0 | 0 | 2  | 3  | 41 |
| PGSC0003DMG401015205 | TDR8 protein                                             | 2  | 2  | 0  | 35 | 0  | 1 | 0 | 0 | 0 | 0  | 1  | 41 |
| PGSC0003DMG400015200 | GDP-mannose transporter                                  | 8  | 4  | 18 | 0  | 0  | 1 | 0 | 0 | 0 | 8  | 2  | 41 |
| PGSC0003DMG400018153 | Gibberellin receptor GID1                                | 0  | 1  | 0  | 19 | 6  | 1 | 0 | 0 | 0 | 0  | 14 | 41 |
| PGSC0003DMG400015252 | Conserved gene of unknown function                       | 7  | 5  | 24 | 0  | 0  | 0 | 0 | 0 | 0 | 5  | 1  | 42 |
| PGSC0003DMG400018122 | Zinc ion binding protein                                 | 6  | 13 | 0  | 9  | 9  | 1 | 0 | 0 | 0 | 0  | 4  | 42 |
| PGSC0003DMG400000598 | Conserved gene of unknown function                       | 5  | 2  | 0  | 20 | 14 | 1 | 0 | 0 | 0 | 0  | 0  | 42 |
| PGSC0003DMG400017116 | Nodulin family protein                                   | 3  | 5  | 12 | 0  | 0  | 0 | 0 | 0 | 0 | 18 | 4  | 42 |
| PGSC0003DMG400025335 | Hypersensitive-induced reaction protein                  | 2  | 0  | 0  | 6  | 0  | 0 | 0 | 0 | 0 | 4  | 30 | 42 |
| PGSC0003DMG400014198 | Conserved gene of unknown function                       | 4  | 8  | 18 | 0  | 0  | 0 | 2 | 0 | 0 | 10 | 0  | 42 |
| PGSC0003DMG400024584 | Alpha-n-acetylglucosaminidase                            | 2  | 3  | 0  | 36 | 0  | 0 | 1 | 0 | 0 | 0  | 0  | 42 |
| PGSC0003DMG402024654 | Heparanase-2                                             | 1  | 9  | 0  | 27 | 0  | 0 | 0 | 0 | 0 | 0  | 5  | 42 |
| PGSC0003DMG400024532 | Multidrug resistance protein                             | 6  | 1  | 2  | 3  | 23 | 1 | 0 | 0 | 0 | 5  | 1  | 42 |
| PGSC0003DMG400019504 | Sand family protein                                      | 2  | 2  | 0  | 0  | 27 | 0 | 0 | 0 | 0 | 10 | 2  | 43 |
| PGSC0003DMG402015244 | EMB2746                                                  | 1  | 0  | 14 | 18 | 2  | 1 | 0 | 0 | 0 | 1  | 6  | 43 |
| PGSC0003DMG400010150 | Conserved gene of unknown function                       | 8  | 13 | 9  | 10 | 0  | 0 | 0 | 0 | 0 | 3  | 0  | 43 |
| PGSC0003DMG400024570 | 5-formyltetrahydrofolate cycloligase                     | 7  | 5  | 0  | 25 | 0  | 0 | 0 | 0 | 0 | 6  | 0  | 43 |
| PGSC0003DMG400024541 | Heat shock protein                                       | 11 | 13 | 9  | 0  | 0  | 1 | 0 | 0 | 0 | 10 | 0  | 44 |
| PGSC0003DMG400026478 | Transcription regulator                                  | 0  | 0  | 27 | 0  | 9  | 0 | 0 | 0 | 0 | 7  | 1  | 44 |
| PGSC0003DMG400018168 | Transcription factor                                     | 0  | 7  | 8  | 10 | 0  | 1 | 0 | 0 | 0 | 8  | 10 | 44 |
| PGSC0003DMG400024536 | Mitochondrial import receptor subunit TOM5 homolog       | 1  | 0  | 0  | 28 | 0  | 0 | 0 | 0 | 0 | 15 | 0  | 44 |
| PGSC0003DMG400024580 | Pyridoxamine 5-phosphate oxidase                         | 3  | 10 | 11 | 1  | 0  | 1 | 0 | 0 | 0 | 18 | 0  | 44 |
| PGSC0003DMG400024534 | Conserved gene of unknown function                       | 4  | 11 | 0  | 0  | 13 | 3 | 1 | 0 | 0 | 2  | 10 | 44 |
| PGSC0003DMG400024490 | Aldehyde dehydrogenase                                   | 3  | 5  | 0  | 7  | 22 | 0 | 0 | 0 | 0 | 5  | 2  | 44 |
| PGSC0003DMG401024473 | Mannosyl-oligosaccharide 1, 2-alpha-mannosidase IA       | 1  | 2  | 0  | 33 | 0  | 2 | 0 | 0 | 0 | 4  | 2  | 44 |
| PGSC0003DMG400024659 | Conserved gene of unknown function                       | 4  | 17 | 0  | 16 | 0  | 1 | 0 | 0 | 0 | 2  | 4  | 44 |
| PGSC0003DMG400015278 | Cytochrome P450                                          | 1  | 0  | 0  | 37 | 0  | 1 | 0 | 0 | 0 | 5  | 1  | 45 |
| PGSC0003DMG400010158 | Kinase interacting protein                               | 1  | 0  | 0  | 34 | 0  | 0 | 0 | 0 | 0 | 8  | 2  | 45 |
| PGSC0003DMG400014135 | Nodulin                                                  | 10 | 4  | 18 | 0  | 0  | 0 | 0 | 0 | 0 | 8  | 5  | 45 |
| PGSC0003DMG400015191 | Conserved gene of unknown function                       | 5  | 5  | 0  | 20 | 5  | 0 | 0 | 0 | 0 | 9  | 1  | 45 |
| PGSC0003DMG400019856 | Poly(A) polymerase                                       | 2  | 2  | 11 | 0  | 27 | 1 | 1 | 0 | 0 | 1  | 0  | 45 |
| PGSC0003DMG401004331 | Zinc finger protein                                      | 2  | 1  | 0  | 42 | 0  | 0 | 0 | 0 | 0 | 0  | 0  | 45 |
| PGSC0003DMG400015197 | Bromodomain-containing protein                           | 10 | 7  | 19 | 0  | 0  | 0 | 0 | 0 | 0 | 6  | 3  | 45 |
| PGSC0003DMG400013180 | Pentatricopeptide repeat-containing protein              | 8  | 5  | 0  | 24 | 0  | 0 | 0 | 0 | 0 | 7  | 1  | 45 |

|                      |                                                             |    |    |    |    |    |   |   |   |   |    |    |    |
|----------------------|-------------------------------------------------------------|----|----|----|----|----|---|---|---|---|----|----|----|
| PGSC0003DMG400024499 | Para-hydroxybenzoate--polyprenyltransferase                 | 4  | 6  | 15 | 2  | 0  | 2 | 0 | 0 | 0 | 16 | 0  | 45 |
| PGSC0003DMG403014197 | Serine/threonine-protein kinase PBS1                        | 4  | 5  | 0  | 8  | 0  | 1 | 0 | 0 | 0 | 27 | 1  | 46 |
| PGSC0003DMG403024509 | Cell growth defect factor                                   | 1  | 2  | 40 | 0  | 0  | 0 | 0 | 0 | 0 | 2  | 1  | 46 |
| PGSC0003DMG401015240 | Ubiquitin-activating enzyme E1 domain-containing protein    | 1  | 3  | 3  | 33 | 0  | 2 | 0 | 0 | 0 | 3  | 1  | 46 |
| PGSC0003DMG400015307 | Gene of unknown function                                    | 0  | 1  | 0  | 0  | 0  | 0 | 0 | 0 | 0 | 0  | 45 | 46 |
| PGSC0003DMG401014138 | WD-repeat protein                                           | 4  | 2  | 19 | 19 | 2  | 1 | 0 | 0 | 0 | 0  | 0  | 47 |
| PGSC0003DMG400015180 | Gamma tubulin                                               | 3  | 0  | 0  | 36 | 6  | 1 | 0 | 0 | 0 | 0  | 1  | 47 |
| PGSC0003DMG400018099 | Structure-specific recognition protein                      | 5  | 0  | 9  | 12 | 0  | 4 | 0 | 0 | 0 | 9  | 8  | 47 |
| PGSC0003DMG400024553 | Conserved gene of unknown function                          | 8  | 12 | 5  | 0  | 16 | 1 | 0 | 0 | 0 | 4  | 1  | 47 |
| PGSC0003DMG400018183 | ATP binding protein                                         | 4  | 3  | 0  | 0  | 0  | 0 | 0 | 0 | 0 | 6  | 34 | 47 |
| PGSC0003DMG400018175 | Nucleic acid binding                                        | 4  | 5  | 8  | 21 | 0  | 3 | 0 | 0 | 0 | 0  | 6  | 47 |
| PGSC0003DMG402018143 | ABC transporter A family member 2                           | 6  | 6  | 0  | 8  | 22 | 2 | 0 | 1 | 0 | 0  | 2  | 47 |
| PGSC0003DMG401018143 | Conserved gene of unknown function                          | 4  | 10 | 28 | 0  | 0  | 4 | 0 | 0 | 0 | 2  | 0  | 48 |
| PGSC0003DMG400024567 | Galactosyltransferase                                       | 6  | 5  | 0  | 24 | 0  | 1 | 0 | 0 | 0 | 12 | 0  | 48 |
| PGSC0003DMG400018080 | Conserved gene of unknown function                          | 1  | 2  | 13 | 7  | 0  | 1 | 0 | 0 | 0 | 4  | 20 | 48 |
| PGSC0003DMG400024497 | Zinc finger family protein                                  | 1  | 6  | 0  | 15 | 20 | 1 | 0 | 0 | 0 | 4  | 1  | 48 |
| PGSC0003DMG400031047 | Ornithine decarboxylase                                     | 4  | 11 | 0  | 0  | 32 | 1 | 0 | 0 | 0 | 0  | 0  | 48 |
| PGSC0003DMG400013184 | Zinc finger protein                                         | 13 | 9  | 7  | 0  | 13 | 1 | 0 | 0 | 0 | 6  | 0  | 49 |
| PGSC0003DMG400031041 | D-cysteine desulfhydrase                                    | 3  | 5  | 0  | 24 | 14 | 0 | 0 | 0 | 0 | 3  | 0  | 49 |
| PGSC0003DMG400014120 | Stromal cell-derived factor 2                               | 0  | 2  | 0  | 39 | 0  | 0 | 0 | 0 | 0 | 5  | 3  | 49 |
| PGSC0003DMG400010176 | Zinc finger protein                                         | 4  | 3  | 33 | 0  | 0  | 0 | 0 | 0 | 0 | 7  | 2  | 49 |
| PGSC0003DMG401024510 | Enolase                                                     | 5  | 4  | 21 | 12 | 0  | 2 | 0 | 0 | 0 | 3  | 2  | 49 |
| PGSC0003DMG400024575 | Microtubule-associated protein TORTIFOLIA1                  | 16 | 3  | 16 | 0  | 0  | 0 | 0 | 0 | 0 | 15 | 0  | 50 |
| PGSC0003DMG400015276 | Serine-threonine protein kinase, plant-type                 | 5  | 4  | 0  | 20 | 0  | 1 | 0 | 0 | 0 | 18 | 2  | 50 |
| PGSC0003DMG400024492 | Deleted in split hand/splt foot protein 1                   | 1  | 0  | 43 | 0  | 0  | 0 | 0 | 0 | 0 | 4  | 2  | 50 |
| PGSC0003DMG402000630 | Racemase and epimerase, acting on amino acids and derivativ | 6  | 2  | 0  | 15 | 0  | 1 | 0 | 0 | 0 | 9  | 17 | 50 |
| PGSC0003DMG400015241 | AMP-activated protein kinase, gamma regulatory subunit      | 7  | 0  | 0  | 0  | 29 | 2 | 0 | 0 | 0 | 10 | 2  | 50 |
| PGSC0003DMG400024626 | MADS-box protein 1                                          | 2  | 1  | 0  | 0  | 38 | 3 | 0 | 0 | 0 | 3  | 3  | 50 |
| PGSC0003DMG400018174 | Short-chain dehydrogenase                                   | 2  | 3  | 37 | 0  | 3  | 4 | 0 | 0 | 0 | 1  | 0  | 50 |
| PGSC0003DMG400018138 | Cytochrome P450 71A4                                        | 9  | 28 | 0  | 0  | 0  | 0 | 0 | 0 | 0 | 13 | 0  | 50 |
| PGSC0003DMG400018195 | Afc                                                         | 5  | 4  | 0  | 0  | 3  | 1 | 0 | 0 | 0 | 6  | 32 | 51 |
| PGSC0003DMG402015259 | CONSTANS interacting protein 2a                             | 0  | 0  | 0  | 45 | 3  | 0 | 0 | 0 | 0 | 2  | 1  | 51 |
| PGSC0003DMG400015231 | Ufm1-specific protease                                      | 6  | 4  | 20 | 0  | 15 | 3 | 0 | 0 | 0 | 3  | 0  | 51 |
| PGSC0003DMG400031053 | Tubulin-specific chaperone B                                | 0  | 0  | 0  | 6  | 37 | 0 | 0 | 0 | 0 | 7  | 1  | 51 |
| PGSC0003DMG400025332 | Integral membrane HPP family protein                        | 4  | 0  | 1  | 0  | 40 | 0 | 0 | 0 | 0 | 0  | 6  | 51 |
| PGSC0003DMG400017115 | Nodulin family protein                                      | 6  | 5  | 0  | 27 | 0  | 0 | 1 | 0 | 0 | 2  | 10 | 51 |
| PGSC0003DMG400031051 | Conserved gene of unknown function                          | 0  | 0  | 0  | 47 | 0  | 0 | 0 | 0 | 0 | 1  | 3  | 51 |
| PGSC0003DMG400024513 | Serine/threonine protein kinase                             | 11 | 3  | 27 | 0  | 0  | 0 | 0 | 0 | 0 | 10 | 1  | 52 |
| PGSC0003DMG400018193 | Hydrolase                                                   | 4  | 5  | 0  | 28 | 0  | 2 | 0 | 0 | 0 | 4  | 9  | 52 |
| PGSC0003DMG400014194 | Defective in cullin neddylation protein                     | 2  | 2  | 22 | 0  | 18 | 1 | 0 | 1 | 0 | 4  | 2  | 52 |
| PGSC0003DMG400024642 | Glucan endo-1, 3-beta-glucosidase 3                         | 1  | 3  | 0  | 9  | 34 | 0 | 0 | 0 | 0 | 1  | 5  | 53 |
| PGSC0003DMG400018117 | Leucine-rich repeat-containing protein                      | 6  | 7  | 0  | 29 | 0  | 1 | 0 | 0 | 0 | 9  | 1  | 53 |
| PGSC0003DMG400015153 | Tryptophan biosynthesis protein, trpc                       | 7  | 2  | 42 | 0  | 0  | 0 | 0 | 0 | 0 | 1  | 1  | 53 |
| PGSC0003DMG400015251 | Plastid RNA-binding protein                                 | 5  | 4  | 0  | 36 | 7  | 1 | 0 | 0 | 0 | 0  | 0  | 53 |

|                      |                                                 |    |    |    |    |    |   |   |   |   |    |    |    |
|----------------------|-------------------------------------------------|----|----|----|----|----|---|---|---|---|----|----|----|
| PGSC0003DMG400019819 | DNA-3-methyladenine glycosylase                 | 3  | 0  | 24 | 24 | 0  | 0 | 0 | 0 | 0 | 3  | 0  | 54 |
| PGSC0003DMG400024478 | Calmodulin-binding protein                      | 6  | 19 | 0  | 8  | 0  | 3 | 0 | 1 | 0 | 13 | 4  | 54 |
| PGSC0003DMG400018106 | Conserved gene of unknown function              | 2  | 5  | 19 | 4  | 0  | 0 | 0 | 0 | 0 | 17 | 8  | 55 |
| PGSC0003DMG400018130 | D-3-phosphoglycerate dehydrogenase              | 8  | 1  | 0  | 34 | 0  | 1 | 0 | 0 | 0 | 7  | 4  | 55 |
| PGSC0003DMG400014193 | Conserved gene of unknown function              | 0  | 1  | 0  | 37 | 0  | 0 | 0 | 0 | 0 | 3  | 14 | 55 |
| PGSC0003DMG400015155 | 28 kDa ribonucleoprotein, chloroplastic         | 4  | 0  | 44 | 0  | 0  | 0 | 0 | 0 | 0 | 7  | 0  | 55 |
| PGSC0003DMG400018079 | Nuclear ribonuclease Z                          | 4  | 5  | 0  | 39 | 0  | 0 | 0 | 0 | 0 | 8  | 0  | 56 |
| PGSC0003DMG400015281 | Conserved gene of unknown function              | 5  | 4  | 20 | 17 | 0  | 0 | 0 | 0 | 0 | 6  | 4  | 56 |
| PGSC0003DMG400024647 | Expansin                                        | 3  | 3  | 0  | 15 | 35 | 0 | 0 | 0 | 0 | 0  | 0  | 56 |
| PGSC0003DMG400024500 | HT1 protein kinase                              | 7  | 5  | 0  | 0  | 38 | 2 | 0 | 0 | 0 | 3  | 2  | 57 |
| PGSC0003DMG400015211 | Beta-galactosidase                              | 2  | 4  | 0  | 13 | 37 | 1 | 0 | 0 | 0 | 0  | 0  | 57 |
| PGSC0003DMG400015245 | Ribosomal protein PETRP                         | 4  | 1  | 0  | 24 | 20 | 1 | 0 | 0 | 0 | 5  | 2  | 57 |
| PGSC0003DMG402015209 | NPK2                                            | 6  | 5  | 1  | 4  | 0  | 1 | 0 | 0 | 0 | 34 | 6  | 57 |
| PGSC0003DMG400024635 | Conserved gene of unknown function              | 1  | 9  | 0  | 37 | 0  | 1 | 0 | 0 | 0 | 8  | 1  | 57 |
| PGSC0003DMG400024531 | Thylakoid lumenal 25.6 kDa protein, chloroplast | 0  | 0  | 0  | 0  | 57 | 0 | 0 | 0 | 0 | 0  | 0  | 57 |
| PGSC0003DMG400010174 | Peroxisomal membrane 22 kDa family protein      | 4  | 1  | 0  | 0  | 47 | 3 | 0 | 0 | 0 | 3  | 0  | 58 |
| PGSC0003DMG400024512 | H/ACA ribonucleoprotein complex subunit         | 3  | 2  | 17 | 0  | 0  | 1 | 0 | 0 | 0 | 25 | 10 | 58 |
| PGSC0003DMG400015265 | Phospholipase C 4                               | 11 | 2  | 0  | 39 | 0  | 0 | 0 | 0 | 0 | 3  | 3  | 58 |
| PGSC0003DMG400015238 | Kelch repeat protein                            | 4  | 2  | 0  | 7  | 45 | 0 | 0 | 0 | 0 | 0  | 0  | 58 |
| PGSC0003DMG400015165 | 2-deoxyglucose-6-phosphate phosphatase          | 2  | 2  | 29 | 0  | 24 | 1 | 0 | 0 | 0 | 1  | 0  | 59 |
| PGSC0003DMG401024603 | TATA-binding protein-associated phosphoprotein  | 8  | 8  | 0  | 17 | 0  | 1 | 2 | 0 | 0 | 0  | 23 | 59 |
| PGSC0003DMG400024582 | Aminoaldehyde dehydrogenase 2                   | 4  | 0  | 0  | 23 | 28 | 0 | 0 | 0 | 0 | 3  | 1  | 59 |
| PGSC0003DMG400015243 | SAP domain-containing protein                   | 2  | 2  | 33 | 0  | 18 | 1 | 0 | 0 | 0 | 3  | 0  | 59 |
| PGSC0003DMG400024571 | Conserved gene of unknown function              | 3  | 2  | 46 | 0  | 5  | 0 | 0 | 0 | 0 | 3  | 0  | 59 |
| PGSC0003DMG400031039 | Conserved gene of unknown function              | 0  | 2  | 24 | 5  | 18 | 1 | 1 | 0 | 0 | 8  | 0  | 59 |
| PGSC0003DMG400025336 | Nitrate transporter NRT1-5                      | 11 | 5  | 0  | 32 | 0  | 3 | 0 | 0 | 0 | 2  | 6  | 59 |
| PGSC0003DMG400014202 | 50S ribosomal protein L3                        | 2  | 0  | 0  | 52 | 0  | 1 | 0 | 0 | 0 | 4  | 1  | 60 |
| PGSC0003DMG400018110 | Alliin lyase                                    | 3  | 3  | 0  | 0  | 47 | 1 | 0 | 0 | 0 | 0  | 6  | 60 |
| PGSC0003DMG401031036 | Chalcone reductase                              | 13 | 8  | 0  | 17 | 0  | 0 | 0 | 0 | 0 | 21 | 1  | 60 |
| PGSC0003DMG400019521 | Ribulose-phosphate 3-epimerase, chloroplastic   | 3  | 1  | 7  | 26 | 9  | 0 | 0 | 0 | 0 | 8  | 7  | 61 |
| PGSC0003DMG400010175 | DNA-binding protein RHL1                        | 6  | 6  | 20 | 10 | 0  | 1 | 0 | 0 | 0 | 5  | 13 | 61 |
| PGSC0003DMG402024480 | Gene of unknown function                        | 3  | 5  | 0  | 0  | 0  | 0 | 0 | 0 | 0 | 51 | 2  | 61 |
| PGSC0003DMG400033685 | Calmodulin                                      | 0  | 0  | 0  | 0  | 47 | 0 | 0 | 0 | 0 | 11 | 3  | 61 |
| PGSC0003DMG400024609 | Conserved gene of unknown function              | 2  | 6  | 0  | 48 | 0  | 1 | 0 | 0 | 0 | 0  | 4  | 61 |
| PGSC0003DMG400018158 | Conserved gene of unknown function              | 8  | 8  | 0  | 19 | 13 | 0 | 0 | 0 | 0 | 2  | 11 | 61 |
| PGSC0003DMG400024625 | MADS box protein                                | 2  | 3  | 0  | 13 | 37 | 2 | 0 | 0 | 0 | 2  | 2  | 61 |
| PGSC0003DMG400039813 | Gene of unknown function                        | 1  | 2  | 0  | 0  | 55 | 1 | 1 | 1 | 0 | 0  | 0  | 61 |
| PGSC0003DMG400018185 | Conserved gene of unknown function              | 2  | 1  | 13 | 18 | 27 | 0 | 0 | 0 | 0 | 1  | 0  | 62 |
| PGSC0003DMG400024615 | WD-repeat protein                               | 10 | 11 | 0  | 36 | 4  | 1 | 0 | 0 | 0 | 0  | 0  | 62 |
| PGSC0003DMG400015273 | Alpha-galactosidase                             | 0  | 2  | 22 | 3  | 29 | 1 | 0 | 0 | 0 | 3  | 2  | 62 |
| PGSC0003DMG400025328 | Plasma membrane ATPase 1                        | 10 | 0  | 11 | 0  | 27 | 4 | 0 | 0 | 0 | 8  | 3  | 63 |
| PGSC0003DMG401024581 | Pyridoxamine 5-phosphate oxidase                | 3  | 2  | 29 | 19 | 0  | 3 | 0 | 0 | 0 | 5  | 2  | 63 |
| PGSC0003DMG400026493 | DNA-binding protein smubp-2                     | 5  | 7  | 22 | 0  | 17 | 0 | 0 | 0 | 0 | 8  | 4  | 63 |
| PGSC0003DMG400024524 | Microtubule-associated protein                  | 3  | 6  | 31 | 18 | 0  | 1 | 0 | 0 | 0 | 2  | 2  | 63 |

|                      |                                                             |    |    |    |    |    |   |   |   |   |    |    |    |
|----------------------|-------------------------------------------------------------|----|----|----|----|----|---|---|---|---|----|----|----|
| PGSC0003DMG400013181 | Ubiquitin thiolesterase/ zinc ion binding                   | 6  | 23 | 0  | 0  | 30 | 4 | 0 | 0 | 0 | 0  | 0  | 63 |
| PGSC0003DMG400024634 | 70 kDa subunit of replication protein A                     | 7  | 6  | 37 | 0  | 0  | 7 | 0 | 0 | 0 | 4  | 3  | 64 |
| PGSC0003DMG400024559 | ATP binding protein                                         | 9  | 5  | 0  | 19 | 14 | 0 | 0 | 0 | 0 | 10 | 7  | 64 |
| PGSC0003DMG400015190 | AMP dependent CoA ligase                                    | 7  | 6  | 48 | 0  | 0  | 0 | 0 | 0 | 0 | 1  | 2  | 64 |
| PGSC0003DMG400019518 | Pseudo response regulator                                   | 9  | 5  | 0  | 30 | 0  | 0 | 0 | 0 | 0 | 13 | 7  | 64 |
| PGSC0003DMG400018081 | WRKY72                                                      | 8  | 6  | 0  | 5  | 45 | 0 | 0 | 0 | 0 | 0  | 0  | 64 |
| PGSC0003DMG400013183 | Calcium-dependent protein kinase 1                          | 11 | 1  | 0  | 0  | 47 | 0 | 0 | 0 | 0 | 5  | 1  | 65 |
| PGSC0003DMG400018142 | Pectate lyase                                               | 4  | 5  | 0  | 37 | 0  | 1 | 0 | 0 | 0 | 17 | 1  | 65 |
| PGSC0003DMG400024523 | Transcription factor BIM1                                   | 1  | 8  | 25 | 24 | 0  | 1 | 0 | 0 | 0 | 0  | 6  | 65 |
| PGSC0003DMG400000602 | Conserved gene of unknown function                          | 5  | 6  | 6  | 33 | 7  | 2 | 0 | 0 | 0 | 3  | 3  | 65 |
| PGSC0003DMG400024623 | Glycosyltransferase QUASIMODO1                              | 9  | 0  | 10 | 32 | 0  | 0 | 0 | 0 | 0 | 3  | 11 | 65 |
| PGSC0003DMG400015268 | Ubiquitin activating enzyme                                 | 0  | 1  | 0  | 3  | 56 | 1 | 0 | 0 | 0 | 3  | 2  | 66 |
| PGSC0003DMG400031050 | Conserved gene of unknown function                          | 5  | 5  | 0  | 30 | 0  | 0 | 0 | 0 | 0 | 22 | 4  | 66 |
| PGSC0003DMG400026485 | Steroleosin                                                 | 4  | 5  | 0  | 56 | 0  | 1 | 0 | 0 | 0 | 0  | 0  | 66 |
| PGSC0003DMG400031730 | Protein DEK                                                 | 3  | 10 | 0  | 7  | 38 | 1 | 0 | 0 | 0 | 6  | 2  | 67 |
| PGSC0003DMG400018116 | C2 and GRAM domain-containing protein                       | 13 | 13 | 0  | 33 | 0  | 3 | 0 | 0 | 0 | 4  | 1  | 67 |
| PGSC0003DMG400010179 | Gene of unknown function                                    | 1  | 10 | 0  | 53 | 1  | 2 | 0 | 0 | 0 | 0  | 0  | 67 |
| PGSC0003DMG400024535 | Conserved gene of unknown function                          | 25 | 10 | 0  | 3  | 5  | 0 | 0 | 0 | 0 | 19 | 5  | 67 |
| PGSC0003DMG400015161 | Replication factor C / DNA polymerase III gamma-tau subunit | 9  | 13 | 0  | 39 | 0  | 0 | 0 | 0 | 0 | 6  | 0  | 67 |
| PGSC0003DMG400025349 | ATP-dependent Clp protease proteolytic subunit              | 3  | 2  | 32 | 5  | 5  | 1 | 0 | 0 | 0 | 7  | 12 | 67 |
| PGSC0003DMG400015210 | UPF0426 protein, chloroplastic                              | 0  | 5  | 0  | 0  | 61 | 2 | 0 | 0 | 0 | 0  | 0  | 68 |
| PGSC0003DMG400015226 | Protein-L-isoaspartate O-methyltransferase                  | 5  | 3  | 22 | 31 | 0  | 0 | 1 | 0 | 0 | 6  | 0  | 68 |
| PGSC0003DMG400018173 | Pentatricopeptide repeat-containing protein, mitochondrial  | 6  | 5  | 0  | 22 | 0  | 0 | 1 | 0 | 0 | 31 | 4  | 69 |
| PGSC0003DMG400024585 | Methyltransferase gidB                                      | 3  | 3  | 57 | 0  | 0  | 3 | 0 | 0 | 0 | 4  | 0  | 70 |
| PGSC0003DMG400031043 | DNA polymerase epsilon subunit B                            | 10 | 1  | 0  | 46 | 12 | 1 | 0 | 0 | 0 | 1  | 0  | 71 |
| PGSC0003DMG400024479 | Calmodulin-binding protein                                  | 3  | 6  | 0  | 0  | 61 | 1 | 0 | 0 | 0 | 0  | 0  | 71 |
| PGSC0003DMG400018107 | Notchless                                                   | 6  | 0  | 0  | 37 | 24 | 2 | 0 | 0 | 0 | 2  | 0  | 71 |
| PGSC0003DMG401015175 | B3 domain-containing protein Os01g0905400                   | 7  | 9  | 0  | 43 | 0  | 2 | 0 | 1 | 0 | 6  | 4  | 72 |
| PGSC0003DMG400024525 | Dead box ATP-dependent RNA helicase                         | 3  | 4  | 0  | 56 | 0  | 1 | 0 | 0 | 0 | 2  | 7  | 73 |
| PGSC0003DMG400015152 | Copine                                                      | 12 | 4  | 0  | 16 | 28 | 6 | 0 | 0 | 0 | 6  | 1  | 73 |
| PGSC0003DMG400024643 | Flavonoid 3'-monooxygenase                                  | 13 | 3  | 0  | 25 | 0  | 0 | 0 | 0 | 0 | 0  | 33 | 74 |
| PGSC0003DMG400018082 | Ubiquitin carrier protein                                   | 1  | 0  | 68 | 0  | 0  | 2 | 0 | 0 | 0 | 2  | 1  | 74 |
| PGSC0003DMG400015257 | Ribosome                                                    | 5  | 3  | 0  | 39 | 15 | 0 | 0 | 0 | 0 | 13 | 0  | 75 |
| PGSC0003DMG400024612 | Uridine cytidine kinase I                                   | 6  | 2  | 6  | 19 | 0  | 3 | 0 | 0 | 0 | 25 | 14 | 75 |
| PGSC0003DMG400024586 | PBng143                                                     | 4  | 7  | 11 | 0  | 0  | 0 | 0 | 0 | 0 | 51 | 3  | 76 |
| PGSC0003DMG401024480 | Conserved gene of unknown function                          | 10 | 14 | 0  | 0  | 51 | 1 | 0 | 0 | 0 | 0  | 0  | 76 |
| PGSC0003DMG400024505 | Chromosome-associated kinesin KIF4A                         | 14 | 8  | 0  | 39 | 0  | 4 | 0 | 0 | 0 | 11 | 1  | 77 |
| PGSC0003DMG401024509 | Acetyl-CoA synthetase                                       | 10 | 4  | 0  | 34 | 0  | 1 | 0 | 0 | 0 | 25 | 5  | 79 |
| PGSC0003DMG400018096 | U3 small nucleolar ribonucleoprotein protein mpp10          | 9  | 13 | 0  | 49 | 0  | 4 | 0 | 0 | 0 | 1  | 3  | 79 |
| PGSC0003DMG400015158 | Protein bem46                                               | 6  | 1  | 0  | 0  | 69 | 0 | 0 | 0 | 0 | 1  | 3  | 80 |
| PGSC0003DMG400024675 | Gene of unknown function                                    | 0  | 0  | 0  | 0  | 0  | 0 | 0 | 0 | 0 | 6  | 75 | 81 |
| PGSC0003DMG400014195 | Nucleoporin                                                 | 7  | 6  | 0  | 58 | 0  | 1 | 0 | 0 | 0 | 5  | 4  | 81 |
| PGSC0003DMG400033687 | Hydrolase, alpha/beta fold family protein                   | 7  | 4  | 19 | 0  | 41 | 0 | 0 | 0 | 0 | 7  | 4  | 82 |
| PGSC0003DMG400010180 | TPR domain containing protein                               | 2  | 8  | 33 | 0  | 0  | 1 | 0 | 0 | 0 | 35 | 3  | 82 |

|                      |                                                          |             |             |             |             |             |            |           |           |          |             |             |              |
|----------------------|----------------------------------------------------------|-------------|-------------|-------------|-------------|-------------|------------|-----------|-----------|----------|-------------|-------------|--------------|
| PGSC0003DMG400015215 | Asparaginyl-tRNA synthetase, chloroplastic/mitochondrial | 8           | 4           | 26          | 39          | 1           | 2          | 0         | 0         | 0        | 2           | 0           | 82           |
| PGSC0003DMG400024502 | AtPex14p                                                 | 7           | 15          | 13          | 33          | 4           | 3          | 0         | 1         | 0        | 4           | 3           | 83           |
| PGSC0003DMG400018191 | Kinase                                                   | 6           | 13          | 0           | 39          | 21          | 0          | 0         | 0         | 0        | 3           | 1           | 83           |
| PGSC0003DMG402014138 | WD-repeat protein                                        | 5           | 16          | 42          | 12          | 7           | 2          | 0         | 0         | 0        | 0           | 0           | 84           |
| PGSC0003DMG400018144 | Vacuolar protein sorting                                 | 10          | 0           | 71          | 0           | 0           | 0          | 0         | 0         | 0        | 2           | 1           | 84           |
| PGSC0003DMG400015239 | Coproporphyrinogen III oxidase                           | 16          | 9           | 0           | 33          | 0           | 1          | 0         | 0         | 0        | 12          | 14          | 85           |
| PGSC0003DMG400014140 | Prli-interacting factor I                                | 5           | 4           | 0           | 48          | 24          | 3          | 0         | 0         | 0        | 2           | 0           | 86           |
| PGSC0003DMG400015199 | Conserved gene of unknown function                       | 5           | 16          | 0           | 49          | 0           | 0          | 0         | 0         | 0        | 9           | 7           | 86           |
| PGSC0003DMG400024483 | Structural constituent of ribosome                       | 1           | 1           | 0           | 4           | 72          | 0          | 0         | 0         | 0        | 8           | 3           | 89           |
| PGSC0003DMG400018181 | DEAD-box ATP-dependent RNA helicase 30                   | 4           | 6           | 9           | 22          | 21          | 2          | 0         | 0         | 0        | 29          | 2           | 95           |
| PGSC0003DMG400024503 | 1-deoxy-D-xylulose-5-phosphate reductoisomerase          | 16          | 2           | 0           | 0           | 64          | 4          | 0         | 0         | 0        | 5           | 6           | 97           |
| PGSC0003DMG400035007 | Conserved gene of unknown function                       | 0           | 1           | 0           | 15          | 82          | 0          | 0         | 0         | 0        | 0           | 0           | 98           |
| PGSC0003DMG400018129 | High-affinity nitrate transport system component         | 3           | 5           | 64          | 0           | 19          | 2          | 0         | 0         | 0        | 2           | 3           | 98           |
| PGSC0003DMG400018172 | Conserved gene of unknown function                       | 0           | 0           | 30          | 0           | 68          | 1          | 0         | 0         | 0        | 0           | 1           | 100          |
| PGSC0003DMG400014136 | Prolyl-tRNA synthetase                                   | 1           | 3           | 20          | 67          | 0           | 4          | 0         | 0         | 0        | 5           | 0           | 100          |
| PGSC0003DMG400024588 | Permease I                                               | 4           | 4           | 0           | 0           | 85          | 4          | 0         | 0         | 0        | 2           | 3           | 102          |
| PGSC0003DMG400026490 | Glutamine-rich protein                                   | 12          | 3           | 0           | 0           | 65          | 0          | 0         | 0         | 0        | 23          | 1           | 104          |
| PGSC0003DMG400015266 | CBS domain containing protein                            | 7           | 4           | 0           | 88          | 0           | 0          | 0         | 0         | 0        | 2           | 4           | 105          |
| PGSC0003DMG402024590 | Rac protein                                              | 1           | 3           | 36          | 51          | 0           | 5          | 0         | 0         | 0        | 9           | 0           | 105          |
| PGSC0003DMG400024574 | Conserved gene of unknown function                       | 4           | 4           | 0           | 48          | 32          | 1          | 0         | 0         | 0        | 6           | 13          | 108          |
| PGSC0003DMG400019515 | SET protein, phosphatase 2A inhibitor                    | 7           | 3           | 2           | 59          | 28          | 2          | 1         | 0         | 0        | 7           | 0           | 109          |
| PGSC0003DMG400024465 | Conserved gene of unknown function                       | 4           | 5           | 35          | 38          | 18          | 1          | 0         | 0         | 0        | 6           | 2           | 109          |
| PGSC0003DMG400024560 | Formin 20                                                | 7           | 1           | 11          | 52          | 2           | 1          | 1         | 0         | 0        | 13          | 23          | 111          |
| PGSC0003DMG400046688 | Gene of unknown function                                 | 4           | 14          | 0           | 37          | 56          | 3          | 0         | 0         | 0        | 0           | 0           | 114          |
| PGSC0003DMG402024509 | Acetyl-CoA synthetase                                    | 8           | 6           | 35          | 52          | 0           | 0          | 0         | 0         | 0        | 3           | 17          | 121          |
| PGSC0003DMG400015168 | Nucleic acid binding protein                             | 2           | 2           | 58          | 0           | 51          | 2          | 0         | 0         | 0        | 10          | 0           | 125          |
| PGSC0003DMG400018194 | Conserved gene of unknown function                       | 14          | 11          | 61          | 0           | 29          | 4          | 0         | 0         | 0        | 6           | 2           | 127          |
| PGSC0003DMG400010157 | Forever young oxidoreductase                             | 4           | 6           | 72          | 36          | 3           | 2          | 1         | 0         | 0        | 2           | 2           | 128          |
| PGSC0003DMG400026491 | Sigma factor                                             | 9           | 13          | 27          | 33          | 14          | 2          | 0         | 0         | 0        | 10          | 29          | 137          |
| PGSC0003DMG400018108 | FKBP12-interacting protein of 37 kDa                     | 7           | 2           | 114         | 0           | 0           | 2          | 0         | 0         | 0        | 10          | 2           | 137          |
| PGSC0003DMG400024511 | MIS12 homologue                                          | 6           | 9           | 46          | 49          | 23          | 2          | 0         | 0         | 0        | 7           | 1           | 143          |
| PGSC0003DMG401014139 | WD-repeat protein                                        | 3           | 8           | 13          | 46          | 0           | 1          | 3         | 0         | 0        | 11          | 63          | 148          |
| PGSC0003DMG400031735 | Conserved gene of unknown function                       | 8           | 5           | 0           | 5           | 102         | 0          | 0         | 1         | 0        | 7           | 23          | 151          |
| PGSC0003DMG400015246 | Protein tyrosine phosphatase                             | 7           | 13          | 91          | 0           | 48          | 1          | 0         | 0         | 0        | 1           | 1           | 162          |
| PGSC0003DMG400031733 | Ribosomal pseudouridine synthase                         | 7           | 4           | 0           | 98          | 49          | 5          | 1         | 0         | 0        | 17          | 24          | 205          |
| PGSC0003DMG402024649 | EMB2733/ESP3 (EMBRYO DEFECTIVE 2733)                     | 36          | 17          | 89          | 97          | 24          | 12         | 2         | 0         | 0        | 6           | 10          | 293          |
| PGSC0003DMG400015233 | Transferase, transferring glycosyl groups                | 3           | 1           | 18          | 0           | 419         | 10         | 0         | 0         | 0        | 4           | 25          | 480          |
| <b>Sums</b>          |                                                          | <b>3114</b> | <b>3030</b> | <b>3716</b> | <b>5633</b> | <b>4172</b> | <b>404</b> | <b>71</b> | <b>13</b> | <b>1</b> | <b>3045</b> | <b>2006</b> | <b>25205</b> |

Table S5: Transcript data used for eQTL analysis in the F1 population A×R.

Normalised transcript data (2-ΔCt values) for 43 marker genes were used from two trials, MPI Goltm foil greenhouse [61711] and JKI shelter [68015], in the year 2014 measuring 95 A×R lines. For further details of the experiments see Haas et al. [38] and for details on the measurements see Sprenger *et al.* [14]. Missing data are presented by -99.

| Transcript ID  | PGSC0003       | Transcript ID | F1-Individuals |
|----------------|--------------|--------------|--------------|--------------|--------------|--------------|--------------|--------------|--------------|--------------|--------------|--------------|--------------|--------------|--------------|--------------|--------------|--------------|--------------|--------------|--------------|----------------|---------------|----------------|
| F1-Individuals | DMT400004539 | DMT400006231 | DMT400008092 | DMT400008278 | DMT400008547 | DMT400013094 | DMT400015224 | DMT400017633 | DMT400020366 | DMT400021019 | DMT400021608 | DMT400027201 | DMT400027792 | DMT400028434 | DMT400030682 | DMT400031370 | DMT400031714 | DMT400035714 | DMT400036026 | DMT400037483 | DMT400041989 | F1-Individuals |               |                |
| 1              | 2,23225215   | 0,24123314   | 0,26990058   | 0,47714511   | 0,32499738   | 0,49913432   | 9,09768826   | 1,18961933   | 0,05257424   | 0,01471570   | 0,02372415   | 0,08336005   | 0,00575687   | 0,03198413   | 0,99206049   | 0,80134756   | 0,09588839   | 0,02111629   | 0,05697607   | 1,36178599   | 0,05450378   | 1              |               |                |
| 2              | -99          | -99          | -99          | -99          | -99          | -99          | -99          | -99          | -99          | -99          | -99          | -99          | -99          | -99          | -99          | -99          | -99          | -99          | -99          | -99          | -99          | -99            | 2             |                |
| 3              | -99          | -99          | -99          | -99          | -99          | -99          | -99          | -99          | -99          | -99          | -99          | -99          | -99          | -99          | -99          | -99          | -99          | -99          | -99          | -99          | -99          | -99            | 3             |                |
| 4              | -99          | -99          | -99          | -99          | -99          | -99          | -99          | -99          | -99          | -99          | -99          | -99          | -99          | -99          | -99          | -99          | -99          | -99          | -99          | -99          | -99          | -99            | 4             |                |
| 5              | -99          | -99          | -99          | -99          | -99          | -99          | -99          | -99          | -99          | -99          | -99          | -99          | -99          | -99          | -99          | -99          | -99          | -99          | -99          | -99          | -99          | -99            | 5             |                |
| 6              | 0,06042335   | 0,10375480   | 0,10483919   | 0,29735330   | 0,13776201   | 0,46692088   | 10,39090927  | 4,88463242   | 0,15552841   | 0,02886070   | 0,01284410   | 0,03180175   | 0,00029526   | 0,43204395   | 1,54461790   | 0,67654134   | 0,04582409   | 0,03893604   | 0,02834523   | 0,56536325   | 0,19468991   | 6              |               |                |
| 7              | -99          | -99          | -99          | -99          | -99          | -99          | -99          | -99          | -99          | -99          | -99          | -99          | -99          | -99          | -99          | -99          | -99          | -99          | -99          | -99          | -99          | -99            | 7             |                |
| 8              | -99          | -99          | -99          | -99          | -99          | -99          | -99          | -99          | -99          | -99          | -99          | -99          | -99          | -99          | -99          | -99          | -99          | -99          | -99          | -99          | -99          | -99            | 8             |                |
| 9              | -99          | -99          | -99          | -99          | -99          | -99          | -99          | -99          | -99          | -99          | -99          | -99          | -99          | -99          | -99          | -99          | -99          | -99          | -99          | -99          | -99          | -99            | 9             |                |
| 10             | -99          | -99          | -99          | -99          | -99          | -99          | -99          | -99          | -99          | -99          | -99          | -99          | -99          | -99          | -99          | -99          | -99          | -99          | -99          | -99          | -99          | -99            | 10            |                |
| 11             | -99          | -99          | -99          | -99          | -99          | -99          | -99          | -99          | -99          | -99          | -99          | -99          | -99          | -99          | -99          | -99          | -99          | -99          | -99          | -99          | -99          | -99            | 11            |                |
| 12             | -99          | -99          | -99          | -99          | -99          | -99          | -99          | -99          | -99          | -99          | -99          | -99          | -99          | -99          | -99          | -99          | -99          | -99          | -99          | -99          | -99          | -99            | 12            |                |
| 13             | -99          | -99          | -99          | -99          | -99          | -99          | -99          | -99          | -99          | -99          | -99          | -99          | -99          | -99          | -99          | -99          | -99          | -99          | -99          | -99          | -99          | -99            | 13            |                |
| 14             | -99          | -99          | -99          | -99          | -99          | -99          | -99          | -99          | -99          | -99          | -99          | -99          | -99          | -99          | -99          | -99          | -99          | -99          | -99          | -99          | -99          | -99            | 14            |                |
| 15             | -99          | -99          | -99          | -99          | -99          | -99          | -99          | -99          | -99          | -99          | -99          | -99          | -99          | -99          | -99          | -99          | -99          | -99          | -99          | -99          | -99          | -99            | 15            |                |
| 16             | 5,83304822   | 0,32381686   | 0,21692226   | 0,57087627   | 0,43114648   | 0,27135436   | 25,05887948  | 3,08709526   | 0,21587229   | 0,22286624   | 0,03347551   | 0,11275396   | 0,00224239   | 1,19188910   | 1,79408718   | 0,66032584   | 0,19590824   | 0,01683083   | 0,01486692   | 0,75904115   | 0,30698711   | 16             |               |                |
| 17             | 5,36006316   | 0,24557745   | 0,25283183   | 0,49974014   | 0,40451076   | 3,55352291   | 0,32269654   | 7,21625340   | 0,09370371   | 0,01498071   | 0,06453609   | 0,37794547   | 0,00835728   | 0,53858651   | 1,64518520   | 0,52823434   | 0,09494593   | 0,03540876   | 0,02586688   | 0,62211362   | 0,31737271   | 17             |               |                |
| 18             | 0,41509113   | 0,48013100   | 0,25587303   | 0,61153204   | 0,16442482   | 1,81315216   | 9,80488018   | 5,38828071   | 0,29108250   | 0,02693265   | 0,06308759   | 0,38090417   | 0,01109843   | 0,60730788   | 2,36280407   | 0,45454656   | 0,20783348   | 0,04329967   | 0,02061017   | 0,64505765   | 0,26710891   | 18             |               |                |
| 19             | 2,96904714   | 0,26152123   | 0,21183311   | 0,32646495   | 0,18569412   | 0,35453051   | 21,28846466  | 2,83431479   | 0,08591179   | 0,02240555   | 0,02950289   | 0,03159850   | 0,00913107   | 0,78349719   | 1,17202228   | 0,77916458   | 0,25384153   | 0,01039476   | 0,16828751   | 0,20993287   | 0,04772867   | 19             |               |                |
| 20             | -99          | -99          | -99          | -99          | -99          | -99          | -99          | -99          | -99          | -99          | -99          | -99          | -99          | -99          | -99          | -99          | -99          | -99          | -99          | -99          | -99          | -99            | 20            |                |
| 21             | -99          | -99          | -99          | -99          | -99          | -99          | -99          | -99          | -99          | -99          | -99          | -99          | -99          | -99          | -99          | -99          | -99          | -99          | -99          | -99          | -99          | -99            | 21            |                |
| 22             | -99          | -99          | -99          | -99          | -99          | -99          | -99          | -99          | -99          | -99          | -99          | -99          | -99          | -99          | -99          | -99          | -99          | -99          | -99          | -99          | -99          | -99            | 22            |                |
| 23             | -99          | -99          | -99          | -99          | -99          | -99          | -99          | -99          | -99          | -99          | -99          | -99          | -99          | -99          | -99          | -99          | -99          | -99          | -99          | -99          | -99          | -99            | 23            |                |
| 24             | 3,95108806   | 0,26558582   | 0,26265665   | 0,52933392   | 0,13051160   | 0,23576898   | 20,70991892  | 1,47759409   | 0,08022802   | 0,02768503   | 0,00950070   | 0,03768802   | 0,00300223   | 0,21378759   | 0,79402151   | 0,29103206   | 0,05105691   | 0,02385193   | 0,04541303   | 0,42846522   | 0,08486127   | 24             |               |                |
| 25             | -99          | -99          | -99          | -99          | -99          | -99          | -99          | -99          | -99          | -99          | -99          | -99          | -99          | -99          | -99          | -99          | -99          | -99          | -99          | -99          | -99          | -99            | 25            |                |
| 26             | -99          | -99          | -99          | -99          | -99          | -99          | -99          | -99          | -99          | -99          | -99          | -99          | -99          | -99          | -99          | -99          | -99          | -99          | -99          | -99          | -99          | -99            | 26            |                |
| 27             | -99          | -99          | -99          | -99          | -99          | -99          | -99          | -99          | -99          | -99          | -99          | -99          | -99          | -99          | -99          | -99          | -99          | -99          | -99          | -99          | -99          | -99            | 27            |                |
| 28             | -99          | -99          | -99          | -99          | -99          | -99          | -99          | -99          | -99          | -99          | -99          | -99          | -99          | -99          | -99          | -99          | -99          | -99          | -99          | -99          | -99          | -99            | 28            |                |
| 29             | -99          | -99          | -99          | -99          | -99          | -99          | -99          | -99          | -99          | -99          | -99          | -99          | -99          | -99          | -99          | -99          | -99          | -99          | -99          | -99          | -99          | -99            | 29            |                |
| 30             | -99          | -99          | -99          | -99          | -99          | -99          | -99          | -99          | -99          | -99          | -99          | -99          | -99          | -99          | -99          | -99          | -99          | -99          | -99          | -99          | -99          | -99            | 30            |                |
| 31             | -99          | -99          | -99          | -99          | -99          | -99          | -99          | -99          | -99          | -99          | -99          | -99          | -99          | -99          | -99          | -99          | -99          | -99          | -99          | -99          | -99          | -99            | 31            |                |
| 32             | -99          | -99          | -99          | -99          | -99          | -99          | -99          | -99          | -99          | -99          | -99          | -99          | -99          | -99          | -99          | -99          | -99          | -99          | -99          | -99          | -99          | -99            | 32            |                |
| 33             | 3,68138848   | 0,22833913   | 0,18858019   | 0,70771971   | 0,35459645   | 1,09524225   | 14,75620672  | 4,23760760   | 0,00001997   | 0,02848310   | 0,02791627   | 0,01091070   | 0,00617755   | 0,63739076   | 2,07519945   | 0,26947998   | 0,06760389   | 0,02117125   | 0,04170170   | 0,36608486   | 0,57484703   | 33             |               |                |
| 34             | -99          | -99          | -99          | -99          | -99          | -99          | -99          | -99          | -99          | -99          | -99          | -99          | -99          | -99          | -99          | -99          | -99          | -99          | -99          | -99          | -99          | -99            | 34            |                |
| 35             | 1,91487471   | 0,28862136   | 0,23427095   | 0,20295756   | 0,18897273   | 0,08592668   | 17,62131885  | 2,70616536   | 0,01798889   | 0,01792665   | 0,01982205   | 0,07052360   | 0,00048432   | 0,56890119   | 1,11903100   | 0,55449640   | 0,10310956   | 0,00002118   | 0,08527402   | 0,71759911   | 0,19536582   | 35             |               |                |
| 36             | -99          | -99          | -99          | -99          | -99          | -99          | -99          | -99          | -99          | -99          | -99          | -99          | -99          | -99          | -99          | -99          | -99          | -99          | -99          | -99          | -99          | -99            | 36            |                |
| 37             | -99          | -99          | -99          | -99          | -99          | -99          | -99          | -99          | -99          | -99          | -99          | -99          | -99          | -99          | -99          | -99          | -99          | -99          | -99          | -99          | -99          | -99            | 37            |                |
| 38             | -99          | -99          | -99          | -99          | -99          | -99          | -99          | -99          | -99          | -99          | -99          | -99          | -99          | -99          | -99          | -99          | -99          | -99          | -99          | -99          | -99          | -99            | 38            |                |
| 39             | -99          | -99          | -99          | -99          | -99          | -99          | -99          | -99          | -99          | -99          | -99          | -99          | -99          | -99          | -99          | -99          | -99          | -99          | -99          | -99          | -99          | -99            | 39            |                |
| 40             | 1,55347605   | 0,01550095   | 0,17683797   | 0,49499985   | 0,34162844   | 0,74354914   | 5,85431348   | 4,22075182   | 0,15523223   | 0,04878225   | 0,03856671   | 0,17586009   | 0,01675227   | 0,48447697   | 1,58831824   | 1,18797131   | 0,09307258   | 0,02387261   | 0,03566122   | 1,19044420   | 0,20159056   | 40             |               |                |
| 41             | -99          | -99          | -99          | -99          | -99          | -99          | -99          | -99          | -99          | -99          | -99          | -99          | -99          | -99          | -99          | -99          | -99          | -99          | -99          |              |              |                |               |                |



[illegible]

[illegible]

|     |            |            |            |            |            |            |             |            |            |            |            |            |            |            |            |            |            |            |            |            |            |     |
|-----|------------|------------|------------|------------|------------|------------|-------------|------------|------------|------------|------------|------------|------------|------------|------------|------------|------------|------------|------------|------------|------------|-----|
| 237 | -99        | -99        | -99        | -99        | -99        | -99        | -99         | -99        | -99        | -99        | -99        | -99        | -99        | -99        | -99        | -99        | -99        | -99        | -99        | -99        | -99        | 237 |
| 238 | -99        | -99        | -99        | -99        | -99        | -99        | -99         | -99        | -99        | -99        | -99        | -99        | -99        | -99        | -99        | -99        | -99        | -99        | -99        | -99        | -99        | 238 |
| 239 | -99        | -99        | -99        | -99        | -99        | -99        | -99         | -99        | -99        | -99        | -99        | -99        | -99        | -99        | -99        | -99        | -99        | -99        | -99        | -99        | -99        | 239 |
| 240 | -99        | -99        | -99        | -99        | -99        | -99        | -99         | -99        | -99        | -99        | -99        | -99        | -99        | -99        | -99        | -99        | -99        | -99        | -99        | -99        | -99        | 240 |
| 241 | -99        | -99        | -99        | -99        | -99        | -99        | -99         | -99        | -99        | -99        | -99        | -99        | -99        | -99        | -99        | -99        | -99        | -99        | -99        | -99        | -99        | 241 |
| 242 | -99        | -99        | -99        | -99        | -99        | -99        | -99         | -99        | -99        | -99        | -99        | -99        | -99        | -99        | -99        | -99        | -99        | -99        | -99        | -99        | -99        | 242 |
| 243 | 2,98400510 | 0,10906424 | 0,22441640 | 0,38163093 | 0,13662089 | 0,47673188 | 17,63353725 | 4,02015186 | 0,00324684 | 0,00559848 | 0,02963098 | 0,08473470 | 0,00427236 | 0,55951550 | 2,37388492 | 0,34275509 | 0,14311532 | 0,01692442 | 0,01567110 | 0,02768503 | 0,28189895 | 243 |
| 244 | 3,14759517 | 0,25265664 | 0,29529933 | 0,60259057 | 0,27419041 | 0,07290947 | 9,06464173  | 3,04248468 | 0,14321455 | 0,01509537 | 0,02030882 | 0,03605267 | 0,01314128 | 1,07642664 | 1,44417943 | 0,40199515 | 0,14055922 | 0,01092858 | 0,03572926 | 0,51557349 | 0,18805805 | 244 |
| 245 | -99        | -99        | -99        | -99        | -99        | -99        | -99         | -99        | -99        | -99        | -99        | -99        | -99        | -99        | -99        | -99        | -99        | -99        | -99        | -99        | -99        | 245 |
| 246 | 4,23173710 | 0,32993415 | 0,09183895 | 0,50286742 | 0,08340340 | 0,15117065 | 6,02203044  | 4,93568389 | 0,08236927 | 0,02345843 | 0,02294383 | 0,14971078 | 0,00157903 | 0,04611085 | 1,36627699 | 0,59470660 | 0,16034486 | 0,01083806 | 0,07787208 | 0,63606672 | 0,20536326 | 246 |
| 247 | -99        | -99        | -99        | -99        | -99        | -99        | -99         | -99        | -99        | -99        | -99        | -99        | -99        | -99        | -99        | -99        | -99        | -99        | -99        | -99        | -99        | 247 |
| 248 | 2,82401940 | 0,42418044 | 0,27657641 | 0,43519986 | 0,12778142 | 0,19912552 | 9,35508006  | 3,29836258 | 0,00024802 | 0,35743430 | 0,02384367 | 0,05182349 | 0,00341654 | 0,02309541 | 1,22412425 | 0,69003909 | 0,16241424 | 0,01552514 | 0,00330473 | 0,39852717 | 0,08812835 | 248 |
| 249 | 0,69279480 | 0,33973930 | 0,26785052 | 0,39873441 | 0,15077823 | 0,27557177 | 7,33857526  | 4,50803901 | 0,09084179 | 0,01679878 | 0,00488814 | 0,19771579 | 0,00283095 | 0,62568135 | 1,92185568 | 0,49844285 | 0,09968360 | 0,00923610 | 0,00148482 | 0,31111072 | 0,07821017 | 249 |
| 250 | -99        | -99        | -99        | -99        | -99        | -99        | -99         | -99        | -99        | -99        | -99        | -99        | -99        | -99        | -99        | -99        | -99        | -99        | -99        | -99        | -99        | 250 |
| 251 | 2,46784195 | 0,32516638 | 0,24002390 | 0,37068098 | 0,19754456 | 0,02685343 | 0,67701045  | 2,63947317 | 0,07819662 | 0,06290201 | 0,02106877 | 0,04588766 | 0,02131850 | 0,62384088 | 1,33723220 | 0,98845692 | 0,18102364 | 0,02145191 | 0,01820212 | 0,43686214 | 0,10098760 | 251 |
| 252 | -99        | -99        | -99        | -99        | -99        | -99        | -99         | -99        | -99        | -99        | -99        | -99        | -99        | -99        | -99        | -99        | -99        | -99        | -99        | -99        | -99        | 252 |
| 253 | -99        | -99        | -99        | -99        | -99        | -99        | -99         | -99        | -99        | -99        | -99        | -99        | -99        | -99        | -99        | -99        | -99        | -99        | -99        | -99        | -99        | 253 |
| 254 | -99        | -99        | -99        | -99        | -99        | -99        | -99         | -99        | -99        | -99        | -99        | -99        | -99        | -99        | -99        | -99        | -99        | -99        | -99        | -99        | -99        | 254 |
| 255 | -99        | -99        | -99        | -99        | -99        | -99        | -99         | -99        | -99        | -99        | -99        | -99        | -99        | -99        | -99        | -99        | -99        | -99        | -99        | -99        | -99        | 255 |
| 256 | 1,63750578 | 0,16545376 | 0,17271916 | 0,27385801 | 0,07353118 | 0,02379002 | 0,91795797  | 2,54823795 | 0,16115267 | 0,23220968 | 0,03055389 | 0,02435733 | 0,00204243 | 0,18796032 | 1,02420180 | 0,51068302 | 0,14146333 | 0,00764377 | 0,02015805 | 0,19922906 | 0,03534133 | 256 |
| 257 | -99        | -99        | -99        | -99        | -99        | -99        | -99         | -99        | -99        | -99        | -99        | -99        | -99        | -99        | -99        | -99        | -99        | -99        | -99        | -99        | -99        | 257 |
| 258 | -99        | -99        | -99        | -99        | -99        | -99        | -99         | -99        | -99        | -99        | -99        | -99        | -99        | -99        | -99        | -99        | -99        | -99        | -99        | -99        | -99        | 258 |
| 259 | 3,81782242 | 0,25520880 | 0,24668639 | 0,75615296 | 0,10307383 | 0,08530357 | 15,93083521 | 1,93287722 | 0,09225366 | 0,35793016 | 0,08673451 | 0,37598578 | 0,01633092 | 1,75290766 | 1,04662890 | 1,05976912 | 0,14872819 | 0,02915223 | 0,03697644 | 0,42066684 | 0,29356462 | 259 |
| 260 | -99        | -99        | -99        | -99        | -99        | -99        | -99         | -99        | -99        | -99        | -99        | -99        | -99        | -99        | -99        | -99        | -99        | -99        | -99        | -99        | -99        | 260 |
| 261 | 0,61015598 | 0,20607623 | 0,16948741 | 0,24780033 | 0,23216944 | 0,44357501 | 16,50979155 | 3,09352137 | 0,04942038 | 0,02398456 | 0,03499397 | 0,07579518 | 0,01379462 | 0,52240840 | 1,40761227 | 0,91462357 | 0,10425945 | 0,00733112 | 0,07003646 | 0,10704208 | 0,25547429 | 261 |
| 262 | 3,04828966 | 0,14488699 | 0,24810109 | 0,35551935 | 0,24587552 | 0,31643915 | 5,44903214  | 3,46294626 | 0,08820474 | 0,02351948 | 0,03794359 | 0,12116123 | 0,01410157 | 1,09809281 | 1,86606598 | 0,41322516 | 0,07284632 | 0,02097770 | 0,07489431 | 0,29219431 | 0,31014182 | 262 |
| 263 | -99        | -99        | -99        | -99        | -99        | -99        | -99         | -99        | -99        | -99        | -99        | -99        | -99        | -99        | -99        | -99        | -99        | -99        | -99        | -99        | -99        | 263 |
| 264 | 2,22645739 | 0,14965890 | 0,15709945 | 0,32936291 | 0,20037161 | 0,20902538 | 17,16918913 | 1,08956329 | 0,08880286 | 0,01121637 | 0,00628335 | 0,02853250 | 0,00179942 | 0,51610982 | 1,31380394 | 0,44219358 | 0,23877935 | 0,01191357 | 0,00004168 | 0,37886348 | 0,13581832 | 264 |
| 265 | 3,51311304 | 0,21926539 | 0,23337954 | 0,34959344 | 0,17674606 | 0,24702860 | 5,08324582  | 1,57107276 | 0,13953994 | 0,03279796 | 0,01988397 | 0,02424364 | 0,00804189 | 0,07410681 | 1,43172062 | 0,39331306 | 0,09484727 | 0,01478984 | 0,03358009 | 0,01386652 | 0,17662360 | 265 |

| MPI_FGH_Co [61711] |                             |                        |                                                        |                                  |                                                     |                                     |                                         |                                   |                                                     |                                  |                             |                         |                                                       |                                        |                                                               |                                         |                                                         |             |              |                                        |                          |              |  |  |  |    | Location_<br>Treatment |
|--------------------|-----------------------------|------------------------|--------------------------------------------------------|----------------------------------|-----------------------------------------------------|-------------------------------------|-----------------------------------------|-----------------------------------|-----------------------------------------------------|----------------------------------|-----------------------------|-------------------------|-------------------------------------------------------|----------------------------------------|---------------------------------------------------------------|-----------------------------------------|---------------------------------------------------------|-------------|--------------|----------------------------------------|--------------------------|--------------|--|--|--|----|------------------------|
| 15                 | 4                           | 50                     | 32                                                     | 31                               | 28                                                  | 19                                  | 26                                      | 5                                 | 36                                                  | 20                               | 29                          | 14                      | 30                                                    | 9                                      | 13                                                            | 2                                       | 18                                                      | 16          | 10           | 7                                      | 34                       | Gene product |  |  |  |    | Transcript ID          |
| Kinase             | Receptor_<br>protein_kinase | Reticuline_<br>oxidase | Serine-<br>threonine_<br>protein_kinase<br>_plant-type | TMV_<br>resistance_<br>protein_N | Homoserine_d<br>ehydrogenase<br>_family_protei<br>n | Cc-nbs-lrr<br>resistance<br>protein | UDP-glucose:<br>glucosyltrans<br>ferase | Methionyl-<br>tRNA_<br>synthetase | 70_kDa_<br>subunit_of_<br>replication_<br>protein_A | Gene_of_<br>unknown_<br>function | RING_<br>finger_<br>protein | Flagellin-<br>sensing 2 | Serine-<br>threonine<br>protein kinase,<br>plant-type | TIR-NBS-<br>LRR_disease_<br>resistance | LRR receptor-<br>like serine/<br>threonine-<br>protein kinase | Poly(ADP-<br>ribose)_glyco<br>hydrolase | Bacterial_spot<br>_disease_<br>resistance_<br>protein_4 | Extensin    | Lipoxygenase | Betaine_<br>aldehyde_<br>dehydrogenase | Fatty_acid<br>desaturase | Ranking      |  |  |  |    | F1-Individuals         |
| PGSC0003           | PGSC0003                    | PGSC0003               | PGSC0003                                               | PGSC0003                         | PGSC0003                                            | PGSC0003                            | PGSC0003                                | PGSC0003                          | PGSC0003                                            | PGSC0003                         | PGSC0003                    | PGSC0003                | PGSC0003                                              | PGSC0003                               | PGSC0003                                                      | PGSC0003                                | PGSC0003                                                | PGSC0003    | PGSC0003     | PGSC0003                               | PGSC0003                 |              |  |  |  |    |                        |
| DMT400042362       | DMT400045689                | DMT40004630            | DMT40004644                                            | DMT40004689                      | DMT40004811                                         | DMT40004909                         | DMT40004912                             | DMT40004917                       | DMT40005251                                         | DMT40006237                      | DMT40006687                 | DMT40006877             | DMT40007114                                           | DMT40007188                            | DMT40007551                                                   | DMT40008081                             | DMT40008201                                             | DMT40008202 | DMT40008302  | DMT40008385                            |                          |              |  |  |  |    |                        |
| 0,08903399         | 0,023334893                 | 6,20529587             | 0,11970041                                             | 0,02870608                       | 0,11083612                                          | 0,48750874                          | 1,84228977                              | 0,06014131                        | 0,77405072                                          | 0,00051025                       | 1,15548618                  | 0,05943679              | 0,04564182                                            | 0,76923697                             | 0,14921867                                                    | 0,36920654                              | 0,19244259                                              | 8,95379942  | 3,63133493   | 0,75707073                             | 0,06686986               |              |  |  |  |    | 1                      |
| -99                | -99                         | -99                    | -99                                                    | -99                              | -99                                                 | -99                                 | -99                                     | -99                               | -99                                                 | -99                              | -99                         | -99                     | -99                                                   | -99                                    | -99                                                           | -99                                     | -99                                                     | -99         | -99          | -99                                    | -99                      |              |  |  |  |    | 2                      |
| -99                | -99                         | -99                    | -99                                                    | -99                              | -99                                                 | -99                                 | -99                                     | -99                               | -99                                                 | -99                              | -99                         | -99                     | -99                                                   | -99                                    | -99                                                           | -99                                     | -99                                                     | -99         | -99          | -99                                    | -99                      |              |  |  |  |    | 3                      |
| -99                | -99                         | -99                    | -99                                                    | -99                              | -99                                                 | -99                                 | -99                                     | -99                               | -99                                                 | -99                              | -99                         | -99                     | -99                                                   | -99                                    | -99                                                           | -99                                     | -99                                                     | -99         | -99          | -99                                    | -99                      |              |  |  |  |    | 4                      |
| -99                | -99                         | -99                    | -99                                                    | -99                              | -99                                                 | -99                                 | -99                                     | -99                               | -99                                                 | -99                              | -99                         | -99                     | -99                                                   | -99                                    | -99                                                           | -99                                     | -99                                                     | -99         | -99          | -99                                    | -99                      |              |  |  |  |    | 5                      |
| 0,05645519         | 0,04636725                  | 4,16480803             | 0,02318363                                             | 0,06059111                       | 0,03850661                                          | 0,26576997                          | 1,20936522                              | 0,08527402                        | 0,09966633                                          | 0,04344247                       | 2,04946876                  | 0,02514212              | 0,00964001                                            | 0,15824699                             | 0,08908029                                                    | 0,71859460                              | 0,03136393                                              | 2,58694611  | 3,02775821   | 0,32292029                             | 0,07475169               |              |  |  |  |    | 6                      |
| -99                | -99                         | -99                    | -99                                                    | -99                              | -99                                                 | -99                                 | -99                                     | -99                               | -99                                                 | -99                              | -99                         | -99                     | -99                                                   | -99                                    | -99                                                           | -99                                     | -99                                                     | -99         | -99          | -99                                    | -99                      |              |  |  |  |    | 7                      |
| -99                | -99                         | -99                    | -99                                                    | -99                              | -99                                                 | -99                                 | -99                                     | -99                               | -99                                                 | -99                              | -99                         | -99                     | -99                                                   | -99                                    | -99                                                           | -99                                     | -99                                                     | -99         | -99          | -99                                    | -99                      |              |  |  |  |    | 8                      |
| -99                | -99                         | -99                    | -99                                                    | -99                              | -99                                                 | -99                                 | -99                                     | -99                               | -99                                                 | -99                              | -99                         | -99                     | -99                                                   | -99                                    | -99                                                           | -99                                     | -99                                                     | -99         | -99          | -99                                    | -99                      |              |  |  |  |    | 9                      |
| -99                | -99                         | -99                    | -99                                                    | -99                              | -99                                                 | -99                                 | -99                                     | -99                               | -99                                                 | -99                              | -99                         | -99                     | -99                                                   | -99                                    | -99                                                           | -99                                     | -99                                                     | -99         | -99          | -99                                    | -99                      |              |  |  |  |    | 10                     |
| -99                | -99                         | -99                    | -99                                                    | -99                              | -99                                                 | -99                                 | -99                                     | -99                               | -99                                                 | -99                              | -99                         | -99                     | -99                                                   | -99                                    | -99                                                           | -99                                     | -99                                                     | -99         | -99          | -99                                    | -99                      |              |  |  |  |    | 11                     |
| -99                | -99                         | -99                    | -99                                                    | -99                              | -99                                                 | -99                                 | -99                                     | -99                               | -99                                                 | -99                              | -99                         | -99                     | -99                                                   | -99                                    | -99                                                           | -99                                     | -99                                                     | -99         | -99          | -99                                    | -99                      |              |  |  |  |    | 12                     |
| -99                | -99                         | -99                    | -99                                                    | -99                              | -99                                                 | -99                                 | -99                                     | -99                               | -99                                                 | -99                              | -99                         | -99                     | -99                                                   | -99                                    | -99                                                           | -99                                     | -99                                                     | -99         | -99          | -99                                    | -99                      |              |  |  |  |    | 13                     |
| -99                | -99                         | -99                    | -99                                                    | -99                              | -99                                                 | -99                                 | -99                                     | -99                               | -99                                                 | -99                              | -99                         | -99                     | -99                                                   | -99                                    | -99                                                           | -99                                     | -99                                                     | -99         | -99          | -99                                    | -99                      |              |  |  |  |    | 14                     |
| -99                | -99                         | -99                    | -99                                                    | -99                              | -99                                                 | -99                                 | -99                                     | -99                               | -99                                                 | -99                              | -99                         | -99                     | -99                                                   | -99                                    | -99                                                           | -99                                     | -99                                                     | -99         | -99          | -99                                    | -99                      |              |  |  |  |    | 15                     |
| 0,05423056         | 0,17173429                  | 3,01728296             | 0,00200143                                             | 0,05260158                       | 0,01802634                                          | 0,46692088                          | 0,37820753                              | 0,02872100                        | 0,02120062                                          | 0,01430305                       | 1,09448334                  | 0,04181748              | 0,04011401                                            | 1,01273028                             | 0,15748103                                                    | 0,47376713                              | 0,17619562                                              | 7,17634874  | 6,38749386   | 0,41617148                             | 0,06736999               |              |  |  |  |    | 16                     |
| 0,02619164         | 0,26411717                  | 1,96053854             | 0,15857640                                             | 0,06580085                       | 0,14981459                                          | 0,13087396                          | 1,01343250                              | 0,14877974                        | 0,00599614                                          | 0,03475225                       | 2,19656623                  | 0,10425945              | 0,10289537                                            | 0,91145921                             | 0,43444637                                                    | 0,93513723                              | 0,01744854                                              | 5,38613354  | 8,71348592   | 0,47180088                             | 0,24421945               |              |  |  |  |    | 17                     |
| 0,09588839         | 0,03967846                  | 3,36941936             | 0,26361420                                             | 0,05841570                       | 0,09709225                                          | 0,39873441                          | 0,95495192                              | 0,05435287                        | 0,00810765                                          | 0,01348501                       | 1,68587784                  | 0,15448086              | 0,0846097                                             | 0,15533986                             | 0,60815037                                                    | 0,65270364                              | 0,03965097                                              | 2,55177301  | 4,27670590   | 0,37125954                             | 0,23791201               |              |  |  |  |    | 18                     |
| 0,08759547         | 0,11825715                  | 5,39641014             | 0,05925169                                             | 0,03455408                       | 0,10562330                                          | 0,38050835                          | 0,95660816                              | 0,02905640                        | 0,50768305                                          | 0,01628853                       | 0,80162533                  | 0,04677884              | 0,03228482                                            | 0,19117953                             | 0,45313097                                                    | 0,07075618                              | 10,57070725                                             | 7,78123958  | 0,70072816   | 0,11336129                             |                          |              |  |  |  | 19 |                        |
| -99                | -99                         | -99                    | -99                                                    | -99                              | -99                                                 | -99                                 | -99                                     | -99                               | -99                                                 | -99                              | -99                         | -99                     | -99                                                   | -99                                    | -99                                                           | -99                                     | -99                                                     | -99         | -99          | -99                                    | -99                      |              |  |  |  |    | 20                     |
| -99                | -99                         | -99                    | -99                                                    | -99                              | -99                                                 | -99                                 | -99                                     | -99                               | -99                                                 | -99                              | -99                         | -99                     | -99                                                   | -99                                    | -99                                                           | -99                                     | -99                                                     | -99         | -99          | -99                                    | -99                      |              |  |  |  |    | 21                     |
| -99                | -99                         | -99                    | -99                                                    | -99                              | -99                                                 | -99                                 | -99                                     | -99                               | -99                                                 | -99                              | -99                         | -99                     | -99                                                   | -99                                    | -99                                                           | -99                                     | -99                                                     | -99         | -99          | -99                                    | -99                      |              |  |  |  |    | 22                     |
| -99                | -99                         | -99                    | -99                                                    | -99                              | -99                                                 | -99                                 | -99                                     | -99                               | -99                                                 | -99                              | -99                         | -99                     | -99                                                   | -99                                    | -99                                                           | -99                                     | -99                                                     | -99         | -99          | -99                                    | -99                      |              |  |  |  |    | 23                     |
| 0,06182139         | 0,05426817                  | 4,93568389             | 0,05066910                                             | 0,07874052                       | 0,11291038                                          | 0,15542064                          | 1,2809422                               | 0,03688684                        | 0,11043352                                          | 0,04158624                       | 0,70821043                  | 0,02797438              | 0,01480522                                            | 0,23362232                             | 0,26892019                                                    | 0,38136649                              | 0,12093050                                              | 5,05338466  | 1,84708467   | 0,44790044                             | 0,15033470               |              |  |  |  |    | 24                     |
| -99                | -99                         | -99                    | -99                                                    | -99                              | -99                                                 | -99                                 | -99                                     | -99                               | -99                                                 | -99                              | -99                         | -99                     | -99                                                   | -99                                    | -99                                                           | -99                                     | -99                                                     | -99         | -99          | -99                                    | -99                      |              |  |  |  |    | 25                     |
| -99                | -99                         | -99                    | -99                                                    | -99                              | -99                                                 | -99                                 | -99                                     | -99                               | -99                                                 | -99                              | -99                         | -99                     | -99                                                   | -99                                    | -99                                                           | -99                                     | -99                                                     | -99         | -99          | -99                                    | -99                      |              |  |  |  |    | 26                     |
| -99                | -99                         | -99                    | -99                                                    | -99                              | -99                                                 | -99                                 | -99                                     | -99                               | -99                                                 | -99                              | -99                         | -99                     | -99                                                   | -99                                    | -99                                                           | -99                                     | -99                                                     | -99         | -99          | -99                                    | -99                      |              |  |  |  |    | 27                     |
| -99                | -99                         | -99                    | -99                                                    | -99                              | -99                                                 | -99                                 | -99                                     | -99                               | -99                                                 | -99                              | -99                         | -99                     | -99                                                   | -99                                    | -99                                                           | -99                                     | -99                                                     | -99         | -99          | -99                                    | -99                      |              |  |  |  |    | 28                     |
| -99                | -99                         | -99                    | -99                                                    | -99                              | -99                                                 | -99                                 | -99                                     | -99                               | -99                                                 | -99                              | -99                         | -99                     | -99                                                   | -99                                    | -99                                                           | -99                                     | -99                                                     | -99         | -99          | -99                                    | -99                      |              |  |  |  |    | 29                     |
| -99                | -99                         | -99                    | -99                                                    | -99                              | -99                                                 | -99                                 | -99                                     | -99                               | -99                                                 | -99                              | -99                         | -99                     | -99                                                   | -99                                    | -99                                                           | -99                                     | -99                                                     | -99         | -99          | -99                                    | -99                      |              |  |  |  |    | 30                     |
| -99                | -99                         | -99                    | -99                                                    | -99                              | -99                                                 | -99                                 | -99                                     | -99                               | -99                                                 | -99                              | -99                         | -99                     | -99                                                   | -99                                    | -99                                                           | -99                                     | -99                                                     | -99         | -99          | -99                                    | -99                      |              |  |  |  |    | 31                     |
| -99                | -99                         | -99                    | -99                                                    | -99                              | -99                                                 | -99                                 | -99                                     | -99                               | -99                                                 | -99                              | -99                         | -99                     | -99                                                   | -99                                    | -99                                                           | -99                                     | -99                                                     | -99         | -99          | -99                                    | -99                      |              |  |  |  |    | 32                     |
| 0,08634461         | 0,08622500                  | 2,02546057             | 0,02996142                                             | 0,03233521                       | 0,11213045                                          | 0,28862136                          | 1,82039307                              | 0,03142921                        | 0,45478293                                          | 0,01551976                       | 0,95346375                  | 0,05525504              | 0,01169674                                            | 0,27840364                             | 0,21026054                                                    | 0,50671625                              | 0,08492011                                              | 2,75346830  | 4,85089180   | 0,26595425                             | 0,08456767               |              |  |  |  |    | 33                     |
| -99                | -99                         | -99                    | -99                                                    | -99                              | -99                                                 | -99                                 | -99                                     | -99                               | -99                                                 | -99                              | -99                         | -99                     | -99                                                   | -99                                    | -99                                                           | -99                                     | -99                                                     | -99         | -99          | -99                                    | -99                      |              |  |  |  |    | 34                     |
| 0,10556840         | 0,09455188                  | 2,84267664             | 0,04028119                                             | 0,09070023                       | 0,06484998                                          | 0,42110444                          | 1,37768876                              | 0,07658735                        | 0,14351267                                          | 0,00053146                       | 1,08016372                  | 0,04141365              | 0,03640423                                            | 0,57048071                             | 0,13399490                                                    | 0,30741298                              | 0,15033470                                              | 3,18490425  | 3,65849427   | 0,24797215                             | 0,08761065               |              |  |  |  |    | 35                     |
| -99                | -99                         | -99                    | -99                                                    | -99                              | -99                                                 | -99                                 | -99                                     | -99                               | -99                                                 | -99                              | -99                         | -99                     | -99                                                   | -99                                    | -99                                                           | -99                                     | -99                                                     | -99         | -99          | -99                                    | -99                      |              |  |  |  |    | 36                     |
| -99                | -99                         | -99                    | -99                                                    | -99                              | -99                                                 | -99                                 | -99                                     | -99                               | -99                                                 | -99                              | -99                         | -99                     | -99                                                   | -99                                    | -99                                                           | -99                                     | -99                                                     | -99         | -99          | -99                                    | -99                      |              |  |  |  |    | 37                     |
| -99                | -99                         | -99                    | -99                                                    | -99                              | -99                                                 | -99                                 | -99                                     | -99                               | -99                                                 | -99                              | -99                         | -99                     | -99                                                   | -99                                    | -99                                                           | -99                                     | -99                                                     | -99         | -99          | -99                                    | -99                      |              |  |  |  |    | 38                     |
| -99                | -99                         | -99                    | -99                                                    | -99                              | -99                                                 | -99                                 | -99                                     | -99                               | -99                                                 | -99                              | -99                         | -99                     | -99                                                   | -99                                    | -99                                                           | -99                                     | -99                                                     | -99         | -99          | -99                                    | -99                      |              |  |  |  |    | 39                     |
| 0,05473092         | 0,06747515                  | 1,31084763             | 0,07466107                                             | 0,07864506                       | 0,34091878                                          | 0,28233894                          | 1,42059962                              | 0,07034053                        | 0,21000564                                          | 0,02169490                       | 2,06837819                  | 0,06956474              | 0,05869982                                            | 0,22259607                             | 0,16916465                                                    | 0,48280081                              | 0,15151158                                              | 1,98825114  | 4,53310632   | 0,33529433                             | 0,11285170               |              |  |  |  |    | 40                     |
| -99                | -99                         | -99                    | -99                                                    | -99                              | -99                                                 | -99                                 | -99                                     | -99                               | -99                                                 | -99                              | -99                         | -99                     | -99                                                   | -99                                    | -99                                                           | -99                                     | -99                                                     | -99         | -99          | -99                                    | -99                      |              |  |  |  |    | 41                     |
| -99                | -99                         | -99                    | -99                                                    | -99                              | -99                                                 | -99                                 | -99                                     | -99                               | -99                                                 | -99                              | -99                         | -99                     | -99                                                   | -99                                    | -99                                                           | -99                                     | -99                                                     | -99         | -99          | -99                                    | -99                      |              |  |  |  |    | 42                     |
| 0,07376090         | 0,11999116                  | 2,16444929             | 0,00870464                                             | 0,05474989                       | 0,17640948                                          | 0,11574325                          | 1,23713248                              | 0,11858554                        | 0,19888412                                          | 0,02474018                       | 1,07251662                  |                         |                                                       |                                        |                                                               |                                         |                                                         |             |              |                                        |                          |              |  |  |  |    |                        |

[illegible]



[illegible]







[illegible]

[illegible]

| MPL_FGH_Ds [61711]      |                    |                                            |                          |                                          |                               |                                  |                           |                                         |                          |                     |                     |                                  |                                |                                                   |                                  |                                             |              |              |                                  |                       |                |               |    |  |  |  | Location_Treatment |  |
|-------------------------|--------------------|--------------------------------------------|--------------------------|------------------------------------------|-------------------------------|----------------------------------|---------------------------|-----------------------------------------|--------------------------|---------------------|---------------------|----------------------------------|--------------------------------|---------------------------------------------------|----------------------------------|---------------------------------------------|--------------|--------------|----------------------------------|-----------------------|----------------|---------------|----|--|--|--|--------------------|--|
| 4                       | 50                 | 32                                         | 31                       | 28                                       | 19                            | 26                               | 5                         | 36                                      | 20                       | 29                  | 14                  | 30                               | 9                              | 13                                                | 2                                | 18                                          | 16           | 10           | 7                                | 34                    | Ranking        | Gene product  | 11 |  |  |  |                    |  |
| Receptor_protein_kinase | Reticuline_oxidase | Serine-threonine_protein_kinase_plant-type | TMV_resistance_protein_N | Homoserine_dehydro_genase_family_protein | Cc-nbs-lrr_resistance_protein | UDP-glucose_glucosyltrans_ferase | Methionyl-tRNA_synthetase | 70_kDa_subunit_of_replication_protein_A | Gene_of_unknown_function | RING_finger_protein | Flagellin-sensing 2 | Serine-threonine_protein_kinase, | TIR-NBS-LRR_disease_resistance | LRR_receptor-like_serine-threonine_protein_kinase | Poly(ADP-ribose)_glyco_hydrolase | Bacterial_spot_disease_resistance_protein_4 | Extensin     | Lipoxygenase | Betalaine_aldehyde_dehydrogenase | Fatty_acid_desaturase |                |               |    |  |  |  |                    |  |
| PGSC0003                | PGSC0003           | PGSC0003                                   | PGSC0003                 | PGSC0003                                 | PGSC0003                      | PGSC0003                         | PGSC0003                  | PGSC0003                                | PGSC0003                 | PGSC0003            | PGSC0003            | PGSC0003                         | PGSC0003                       | PGSC0003                                          | PGSC0003                         | PGSC0003                                    | PGSC0003     | PGSC0003     | PGSC0003                         | PGSC0003              | Transcript ID  | PGSC0003      |    |  |  |  |                    |  |
| DMT140004568            | DMT140004630       | DMT140004644                               | DMT140004689             | DMT140004811                             | DMT140004909                  | DMT140004912                     | DMT140004917              | DMT140005251                            | DMT140006237             | DMT140006687        | DMT140006877        | DMT140006878                     | DMT140007144                   | DMT140007188                                      | DMT140007551                     | DMT140008081                                | DMT140008201 | DMT140008202 | DMT140008302                     | DMT140008385          | FI-Individuals | DMT1400004539 |    |  |  |  |                    |  |
| 0,02050330              | 4,66539748         | 0,10806715                                 | 0,04010706               | 0,20250087                               | 0,52340514                    | 1,80125196                       | 0,04152143                | 0,72648252                              | 0,04543664               | 0,97063447          | 0,05605551          | 0,02653426                       | 0,72146434                     | 0,16210494                                        | 0,55286533                       | 0,28204553                                  | 4,77003549   | 9,82869584   | 0,48903174                       | 0,07850890            | 1              | 12,81933927   |    |  |  |  |                    |  |
| -99                     | -99                | -99                                        | -99                      | -99                                      | -99                           | -99                              | -99                       | -99                                     | -99                      | -99                 | -99                 | -99                              | -99                            | -99                                               | -99                              | -99                                         | -99          | -99          | -99                              | -99                   | 2              | -99           |    |  |  |  |                    |  |
| -99                     | -99                | -99                                        | -99                      | -99                                      | -99                           | -99                              | -99                       | -99                                     | -99                      | -99                 | -99                 | -99                              | -99                            | -99                                               | -99                              | -99                                         | -99          | -99          | -99                              | -99                   | 3              | -99           |    |  |  |  |                    |  |
| -99                     | -99                | -99                                        | -99                      | -99                                      | -99                           | -99                              | -99                       | -99                                     | -99                      | -99                 | -99                 | -99                              | -99                            | -99                                               | -99                              | -99                                         | -99          | -99          | -99                              | -99                   | 4              | -99           |    |  |  |  |                    |  |
| -99                     | -99                | -99                                        | -99                      | -99                                      | -99                           | -99                              | -99                       | -99                                     | -99                      | -99                 | -99                 | -99                              | -99                            | -99                                               | -99                              | -99                                         | -99          | -99          | -99                              | -99                   | 5              | -99           |    |  |  |  |                    |  |
| 0,06940820              | 5,31935013         | 0,06530105                                 | 0,04924940               | 0,04362352                               | 0,11552284                    | 0,56262673                       | 0,03856003                | 0,37873220                              | 0,03171370               | 2,93070956          | 0,03802916          | 0,02745571                       | 0,36659271                     | 0,16235796                                        | 0,68124706                       | 0,05260158                                  | 4,14464920   | 5,50312081   | 0,30150420                       | 0,16738591            | 6              | 9,56490076    |    |  |  |  |                    |  |
| -99                     | -99                | -99                                        | -99                      | -99                                      | -99                           | -99                              | -99                       | -99                                     | -99                      | -99                 | -99                 | -99                              | -99                            | -99                                               | -99                              | -99                                         | -99          | -99          | -99                              | -99                   | 7              | -99           |    |  |  |  |                    |  |
| -99                     | -99                | -99                                        | -99                      | -99                                      | -99                           | -99                              | -99                       | -99                                     | -99                      | -99                 | -99                 | -99                              | -99                            | -99                                               | -99                              | -99                                         | -99          | -99          | -99                              | -99                   | 8              | -99           |    |  |  |  |                    |  |
| -99                     | -99                | -99                                        | -99                      | -99                                      | -99                           | -99                              | -99                       | -99                                     | -99                      | -99                 | -99                 | -99                              | -99                            | -99                                               | -99                              | -99                                         | -99          | -99          | -99                              | -99                   | 9              | -99           |    |  |  |  |                    |  |
| -99                     | -99                | -99                                        | -99                      | -99                                      | -99                           | -99                              | -99                       | -99                                     | -99                      | -99                 | -99                 | -99                              | -99                            | -99                                               | -99                              | -99                                         | -99          | -99          | -99                              | -99                   | 10             | -99           |    |  |  |  |                    |  |
| -99                     | -99                | -99                                        | -99                      | -99                                      | -99                           | -99                              | -99                       | -99                                     | -99                      | -99                 | -99                 | -99                              | -99                            | -99                                               | -99                              | -99                                         | -99          | -99          | -99                              | -99                   | 11             | -99           |    |  |  |  |                    |  |
| -99                     | -99                | -99                                        | -99                      | -99                                      | -99                           | -99                              | -99                       | -99                                     | -99                      | -99                 | -99                 | -99                              | -99                            | -99                                               | -99                              | -99                                         | -99          | -99          | -99                              | -99                   | 12             | -99           |    |  |  |  |                    |  |
| -99                     | -99                | -99                                        | -99                      | -99                                      | -99                           | -99                              | -99                       | -99                                     | -99                      | -99                 | -99                 | -99                              | -99                            | -99                                               | -99                              | -99                                         | -99          | -99          | -99                              | -99                   | 13             | -99           |    |  |  |  |                    |  |
| -99                     | -99                | -99                                        | -99                      | -99                                      | -99                           | -99                              | -99                       | -99                                     | -99                      | -99                 | -99                 | -99                              | -99                            | -99                                               | -99                              | -99                                         | -99          | -99          | -99                              | -99                   | 14             | -99           |    |  |  |  |                    |  |
| -99                     | -99                | -99                                        | -99                      | -99                                      | -99                           | -99                              | -99                       | -99                                     | -99                      | -99                 | -99                 | -99                              | -99                            | -99                                               | -99                              | -99                                         | -99          | -99          | -99                              | -99                   | 15             | -99           |    |  |  |  |                    |  |
| 0,17918230              | 1,45750416         | 0,01095323                                 | 0,06513153               | 0,01307994                               | 0,35050332                    | 0,52358657                       | 0,05545649                | 0,01209454                              | 0,00003735               |                     |                     |                                  |                                |                                                   |                                  |                                             |              |              |                                  |                       |                |               |    |  |  |  |                    |  |

[illegible]

[illegible]

|            |            |            |            |            |            |            |            |            |            |            |            |            |            |            |            |            |             |             |            |            |     |     |              |     |
|------------|------------|------------|------------|------------|------------|------------|------------|------------|------------|------------|------------|------------|------------|------------|------------|------------|-------------|-------------|------------|------------|-----|-----|--------------|-----|
| -99        | -99        | -99        | -99        | -99        | -99        | -99        | -99        | -99        | -99        | -99        | -99        | -99        | -99        | -99        | -99        | -99        | -99         | -99         | -99        | -99        | -99 | -99 | 237          | -99 |
| -99        | -99        | -99        | -99        | -99        | -99        | -99        | -99        | -99        | -99        | -99        | -99        | -99        | -99        | -99        | -99        | -99        | -99         | -99         | -99        | -99        | -99 | -99 | 238          | -99 |
| -99        | -99        | -99        | -99        | -99        | -99        | -99        | -99        | -99        | -99        | -99        | -99        | -99        | -99        | -99        | -99        | -99        | -99         | -99         | -99        | -99        | -99 | -99 | 239          | -99 |
| -99        | -99        | -99        | -99        | -99        | -99        | -99        | -99        | -99        | -99        | -99        | -99        | -99        | -99        | -99        | -99        | -99        | -99         | -99         | -99        | -99        | -99 | -99 | 240          | -99 |
| -99        | -99        | -99        | -99        | -99        | -99        | -99        | -99        | -99        | -99        | -99        | -99        | -99        | -99        | -99        | -99        | -99        | -99         | -99         | -99        | -99        | -99 | -99 | 241          | -99 |
| -99        | -99        | -99        | -99        | -99        | -99        | -99        | -99        | -99        | -99        | -99        | -99        | -99        | -99        | -99        | -99        | -99        | -99         | -99         | -99        | -99        | -99 | -99 | 242          | -99 |
| 0,01661926 | 3,13398875 | 0,12648165 | 0,08567393 | 0,08875671 | 0,48229909 | 1,66324420 | 0,06219748 | 0,05628912 | 0,00291154 | 1,32684514 | 0,07668031 | 0,04629499 | 0,65975396 | 0,30020086 | 0,54601027 | 0,18646800 | 11,53543097 | 15,54091993 | 0,44782284 | 0,21330652 |     | 243 | 2,10489753   |     |
| 0,12015762 | 3,41053957 | 0,05787163 | 0,09638818 | 0,04450157 | 0,31035687 | 0,70417211 | 0,12107727 | 0,02174760 | 0,02436578 | 1,07103082 | 0,04066693 | 0,01306635 | 0,20761751 | 0,17134785 | 0,36475509 | 0,06003718 | 9,08823412  | 6,78806321  | 0,39584293 | 0,16585564 |     | 244 | 15,46837779  |     |
| -99        | -99        | -99        | -99        | -99        | -99        | -99        | -99        | -99        | -99        | -99        | -99        | -99        | -99        | -99        | -99        | -99        | -99         | -99         | -99        | -99        | -99 | 245 | -99          |     |
| 0,13956412 | 3,01466982 | 0,18225117 | 0,10791744 | 0,11502346 | 0,00005222 | 1,25962998 | 0,08579278 | 0,75838377 | 0,02960531 | 1,63353798 | 0,09565605 | 0,07971527 | 0,51548416 | 0,13378609 | 0,47041305 | 0,04979001 | 3,89601707  | 8,20782516  | 0,21286343 | 0,23948380 |     | 246 | 7,76911356   |     |
| -99        | -99        | -99        | -99        | -99        | -99        | -99        | -99        | -99        | -99        | -99        | -99        | -99        | -99        | -99        | -99        | -99        | -99         | -99         | -99        | -99        | -99 | 247 | -99          |     |
| 0,01978087 | 5,07444486 | 0,09114138 | 0,15531295 | 0,03753161 | 0,19094777 | 1,48169653 | 0,19536582 | 0,52640679 | 0,00674601 | 1,30789797 | 0,07250629 | 0,06503003 | 0,54383843 | 0,14652817 | 0,56418883 | 0,15802777 | 18,28070748 | 6,94151227  | 0,72812094 | 0,09133110 |     | 248 | 10,56997457  |     |
| 0,08136206 | 2,04698425 | 0,09015179 | 0,06352640 | 0,09065309 | 0,27883818 | 1,39522713 | 0,17561646 | 0,02124843 | 0,01193630 | 1,14432750 | 0,06396826 | 0,02676516 | 0,85826793 | 0,07591349 | 0,48146406 | 0,08364946 | 11,15408295 | 7,37938200  | 0,50575129 | 0,18550115 |     | 249 | 12,35908472  |     |
| -99        | -99        | -99        | -99        | -99        | -99        | -99        | -99        | -99        | -99        | -99        | -99        | -99        | -99        | -99        | -99        | -99        | -99         | -99         | -99        | -99        | -99 | 250 | -99          |     |
| 0,06867839 | 4,45368647 | 0,07850890 | 0,08561456 | 0,02308341 | 0,20877198 | 1,76051803 | 0,06206828 | 0,83335321 | 0,01275317 | 2,22530024 | 0,03129335 | 0,05486386 | 0,90877812 | 0,09585517 | 0,34868592 | 0,05664137 | 8,33972609  | 4,86014717  | 0,42249319 | 0,09284706 |     | 251 | 7,80690114   |     |
| -99        | -99        | -99        | -99        | -99        | -99        | -99        | -99        | -99        | -99        | -99        | -99        | -99        | -99        | -99        | -99        | -99        | -99         | -99         | -99        | -99        | -99 | 252 | -99          |     |
| -99        | -99        | -99        | -99        | -99        | -99        | -99        | -99        | -99        | -99        | -99        | -99        | -99        | -99        | -99        | -99        | -99        | -99         | -99         | -99        | -99        | -99 | 253 | -99          |     |
| -99        | -99        | -99        | -99        | -99        | -99        | -99        | -99        | -99        | -99        | -99        | -99        | -99        | -99        | -99        | -99        | -99        | -99         | -99         | -99        | -99        | -99 | 254 | -99          |     |
| -99        | -99        | -99        | -99        | -99        | -99        | -99        | -99        | -99        | -99        | -99        | -99        | -99        | -99        | -99        | -99        | -99        | -99         | -99         | -99        | -99        | -99 | 255 | -99          |     |
| 0,02933466 | 2,47898579 | 0,01523729 | 0,09901219 | 0,01802009 | 0,23811823 | 1,51755626 | 0,05100385 | 0,39385869 | 0,01512155 | 3,02670905 | 0,03757065 | 0,03728528 | 0,26752581 | 0,06678880 | 0,31485293 | 0,02873096 | 4,14321303  | 1,63892519  | 0,53061965 | 0,09751379 |     | 256 | 19,34347381  |     |
| -99        | -99        | -99        | -99        | -99        | -99        | -99        | -99        | -99        | -99        | -99        | -99        | -99        | -99        | -99        | -99        | -99        | -99         | -99         | -99        | -99        | -99 | 257 | -99          |     |
| -99        | -99        | -99        | -99        | -99        | -99        | -99        | -99        | -99        | -99        | -99        | -99        | -99        | -99        | -99        | -99        | -99        | -99         | -99         | -99        | -99        | -99 | 258 | -99          |     |
| 0,07241839 | 3,62630432 | 0,04454786 | 0,09033945 | 0,03811493 | 0,14932214 | 0,84469359 | 0,07777768 | 0,26508005 | 0,01008601 | 2,83529726 | 0,05492094 | 0,03292894 | 0,70539341 | 0,24613129 | 0,63090732 | 0,14818795 | 5,27986119  | 10,25673749 | 0,33552682 | 0,17271916 |     | 259 | 10,14537298  |     |
| -99        | -99        | -99        | -99        | -99        | -99        | -99        | -99        | -99        | -99        | -99        | -99        | -99        | -99        | -99        | -99        | -99        | -99         | -99         | -99        | -99        | -99 | 260 | -99          |     |
| 0,06198230 | 3,77636968 | 0,10125043 | 0,14670602 | 0,04626292 | 0,12824727 | 0,83393104 | 0,09558977 | 0,30608410 | 0,00980002 | 2,78369278 | 0,02324397 | 0,01501970 | 0,10323471 | 0,13792922 | 0,51799138 | 0,04407181 | 4,96570997  | 7,51618199  | 0,09106244 | 0,18263055 |     | 261 | 6,47306953   |     |
| 0,03737584 | 4,15615656 | 0,03768802 | 0,05563937 | 0,05820351 | 0,32113460 | 1,31608257 | 0,01166435 | 0,42521076 | 0,03538422 | 1,18447685 | 0,02741767 | 0,03732407 | 0,60762368 | 0,14281803 | 0,37119521 | 0,10652397 | 7,91313845  | 5,49549715  | 0,55757972 | 0,13343879 |     | 262 | 9,53346060   |     |
| -99        | -99        | -99        | -99        | -99        | -99        | -99        | -99        | -99        | -99        | -99        | -99        | -99        | -99        | -99        | -99        | -99        | -99         | -99         | -99        | -99        | -99 | 263 | -99          |     |
| 0,10795485 | 3,47858362 | 0,06486122 | 0,07363319 | 0,18939892 | 0,28233894 | 2,23689882 | 0,11075932 | 0,04751412 | 0,04542090 | 3,03669076 | 0,04915561 | 0,03108797 | 0,72522472 | 0,08928119 | 0,23140629 | 0,20725804 | 17,69782299 | 16,84793651 | 0,29740483 | 0,03956860 |     | 264 | 5,73482714   |     |
| 0,01570916 | 4,70681125 | 0,09035511 | 0,07045032 | 0,06244587 | 0,30987322 | 0,52150392 | 0,05762146 | 0,39932744 | 0,03066528 | 1,10477303 | 0,02100316 | 0,04333721 | 0,61845906 | 0,13752349 | 0,35226914 | 0,05936474 | 6,48789288  | 7,74223447  | 0,21654669 | 0,05093319 |     | 265 | -99,00000000 |     |

| JKI Shelter_Co [68015]                      |                                               |                           |                        |                       |                            |                       |                            |                       |                            |                                    |                      |                                             |                                            |                       |                                                      |                                       |                                   |                                       |                                   |                              |                      |                         |  |  |  |  |  |  |  |  |  |  | Location_Treatment |  |
|---------------------------------------------|-----------------------------------------------|---------------------------|------------------------|-----------------------|----------------------------|-----------------------|----------------------------|-----------------------|----------------------------|------------------------------------|----------------------|---------------------------------------------|--------------------------------------------|-----------------------|------------------------------------------------------|---------------------------------------|-----------------------------------|---------------------------------------|-----------------------------------|------------------------------|----------------------|-------------------------|--|--|--|--|--|--|--|--|--|--|--------------------|--|
| 12                                          | 27                                            | 47                        | 38                     | 23                    | 25                         | 54                    | 45                         | 1                     | 66                         | 22                                 | 35                   | 17                                          | 57                                         | 21                    | 6                                                    | 8                                     | 3                                 | 24                                    | 33                                | Ranking                      | 15                   | 4                       |  |  |  |  |  |  |  |  |  |  |                    |  |
| Bacterial_spot_disease_resistance_protein_4 | Glutamyl-tRNA(Gln)_amidotransferase_subunit_A | (S)-norcloaurine synthase | Cytochrome_P450        | PR1_protein           | Beta-D-glucan-oxohydrolase | SBT4B_protein         | Ethylene-inducing_xylanase | Glucosyltrans ferase  | Nbs-Irr_resistance_protein | Acidic_class_II_1_3-beta-glucanase | Hcr9-OR2A            | Serine-threonine protein kinase, plant-type | Gamma-amino butyrate_transaminase Isoform1 | O-methyl transferase  | Multidrug_resistance_protein_ABC_trans porter_family | BED_finger-nbs-Irr_resistance_protein | S-locus-specific_glyco protein_S6 | NADPH-dependent_cocodeinone_reductase | Desacetoxyl ndoline_4-hydroxylase | Gene product                 | Kinase               | Receptor_protein_kinase |  |  |  |  |  |  |  |  |  |  |                    |  |
| PGSC0003 DMT400006231                       | PGSC0003 DMT400000809                         | PGSC0003 DMT4000008278    | PGSC0003 DMT4000008547 | PGSC0003 DMT400013094 | PGSC0003 DMT400015224      | PGSC0003 DMT400017633 | PGSC0003 DMT400020366      | PGSC0003 DMT400022019 | PGSC0003 DMT40002160       | PGSC0003 DMT400027201              | PGSC0003 DMT40002779 | PGSC0003 DMT40002843                        | PGSC0003 DMT400030682                      | PGSC0003 DMT400031370 | PGSC0003 DMT400031714                                | PGSC0003 DMT400035714                 | PGSC0003 DMT400036026             | PGSC0003 DMT400037483                 | PGSC0003 DMT40004198              | Transcript ID F1-Individuals | PGSC0003 DMT40004236 | PGSC0003 DMT40004568    |  |  |  |  |  |  |  |  |  |  |                    |  |
| 0.49217729                                  | 0.56654011                                    | 0.22739146                | 5.42735772             | 0.45195467            | 21.17441197                | 0.60259057            | 0.00487714                 | 0.00396421            | 0.02814944                 | 0.51343374                         | 0.00206056           | 0.11512316                                  | 5.35263768                                 | 0.87433012            | 0.01752126                                           | 0.02874092                            | 0.16034486                        | 0.49835648                            | 1.46433942                        | 1                            | 0.33016292           | 0.20938790              |  |  |  |  |  |  |  |  |  |  |                    |  |
| -99                                         | -99                                           | -99                       | -99                    | -99                   | -99                        | -99                   | -99                        | -99                   | -99                        | -99                                | -99                  | -99                                         | -99                                        | -99                   | -99                                                  | -99                                   | -99                               | -99                                   | -99                               | 2                            | -99                  | -99                     |  |  |  |  |  |  |  |  |  |  |                    |  |
| -99                                         | -99                                           | -99                       | -99                    | -99                   | -99                        | -99                   | -99                        | -99                   | -99                        | -99                                | -99                  | -99                                         | -99                                        | -99                   | -99                                                  | -99                                   | -99                               | -99                                   | -99                               | 3                            | -99                  | -99                     |  |  |  |  |  |  |  |  |  |  |                    |  |
| -99                                         | -99                                           | -99                       | -99                    | -99                   | -99                        | -99                   | -99                        | -99                   | -99                        | -99                                | -99                  | -99                                         | -99                                        | -99                   | -99                                                  | -99                                   | -99                               | -99                                   | -99                               | 4                            | -99                  | -99                     |  |  |  |  |  |  |  |  |  |  |                    |  |
| -99                                         | -99                                           | -99                       | -99                    | -99                   | -99                        | -99                   | -99                        | -99                   | -99                        | -99                                | -99                  | -99                                         | -99                                        | -99                   | -99                                                  | -99                                   | -99                               | -99                                   | -99                               | 5                            | -99                  | -99                     |  |  |  |  |  |  |  |  |  |  |                    |  |
| 0.03641685                                  | 0.64293732                                    | 0.15482926                | 12.17415724            | 0.03569213            | 8.10465065                 | 0.80874119            | 0.10827334                 | 0.00418299            | 0.02322383                 | 0.32936291                         | 0.00347626           | 0.17822233                                  | 4.40075178                                 | 2.97471200            | 0.04845368                                           | 0.04285924                            | 0.04654435                        | 0.91454061                            | 1.18078803                        | 6                            | 0.44311406           | 0.11980417              |  |  |  |  |  |  |  |  |  |  |                    |  |
| -99                                         | -99                                           | -99                       | -99                    | -99                   | -99                        | -99                   | -99                        | -99                   | -99                        | -99                                | -99                  | -99                                         | -99                                        | -99                   | -99                                                  | -99                                   | -99                               | -99                                   | -99                               | 7                            | -99                  | -99                     |  |  |  |  |  |  |  |  |  |  |                    |  |
| -99                                         | -99                                           | -99                       | -99                    | -99                   | -99                        | -99                   | -99                        | -99                   | -99                        | -99                                | -99                  | -99                                         | -99                                        | -99                   | -99                                                  | -99                                   | -99                               | -99                                   | -99                               | 8                            | -99                  | -99                     |  |  |  |  |  |  |  |  |  |  |                    |  |
| -99                                         | -99                                           | -99                       | -99                    | -99                   | -99                        | -99                   | -99                        | -99                   | -99                        | -99                                | -99                  | -99                                         | -99                                        | -99                   | -99                                                  | -99                                   | -99                               | -99                                   | -99                               | 9                            | -99                  | -99                     |  |  |  |  |  |  |  |  |  |  |                    |  |
| -99                                         | -99                                           | -99                       | -99                    | -99                   | -99                        | -99                   | -99                        | -99                   | -99                        | -99                                | -99                  | -99                                         | -99                                        | -99                   | -99                                                  | -99                                   | -99                               | -99                                   | -99                               | 10                           | -99                  | -99                     |  |  |  |  |  |  |  |  |  |  |                    |  |
| -99                                         | -99                                           | -99                       | -99                    | -99                   | -99                        | -99                   | -99                        | -99                   | -99                        | -99                                | -99                  | -99                                         | -99                                        | -99                   | -99                                                  | -99                                   | -99                               | -99                                   | -99                               | 11                           | -99                  | -99                     |  |  |  |  |  |  |  |  |  |  |                    |  |
| -99                                         | -99                                           | -99                       | -99                    | -99                   | -99                        | -99                   | -99                        | -99                   | -99                        | -99                                | -99                  | -99                                         | -99                                        | -99                   | -99                                                  | -99                                   | -99                               | -99                                   | -99                               | 12                           | -99                  | -99                     |  |  |  |  |  |  |  |  |  |  |                    |  |
| -99                                         | -99                                           | -99                       | -99                    | -99                   | -99                        | -99                   | -99                        | -99                   | -99                        | -99                                | -99                  | -99                                         | -99                                        | -99                   | -99                                                  | -99                                   | -99                               | -99                                   | -99                               | 13                           | -99                  | -99                     |  |  |  |  |  |  |  |  |  |  |                    |  |
| -99                                         | -99                                           | -99                       | -99                    | -99                   | -99                        | -99                   | -99                        | -99                   | -99                        | -99                                | -99                  | -99                                         | -99                                        | -99                   | -99                                                  | -99                                   | -99                               | -99                                   | -99                               | 14                           | -99                  | -99                     |  |  |  |  |  |  |  |  |  |  |                    |  |
| -99                                         | -99                                           | -99                       | -99                    | -99                   | -99                        | -99                   | -99                        | -99                   | -99                        | -99                                | -99                  | -99                                         | -99                                        | -99                   | -99                                                  | -99                                   | -99                               | -99                                   | -99                               | 15                           | -99                  | -99                     |  |  |  |  |  |  |  |  |  |  |                    |  |
| 0.20173034                                  | 0.34233958                                    | 0.31501665                | 5.84620330             | 0.19909101            | 11.51545890                | 0.29947345            | 0.23012665                 | 0.00004205            | 0.01231448                 | 0.97299210                         | 0.00390490           | 0.07287158                                  | 5.19995811                                 | 4.42139001            | 0.01560876                                           | 0.03017505                            | 0.03910                           |                                       |                                   |                              |                      |                         |  |  |  |  |  |  |  |  |  |  |                    |  |





[illegible]

|              |              |              |              |              |              |              |              |              |              |              |              |              |              |              |              |              |              |              |              |     |              |              |     |     |
|--------------|--------------|--------------|--------------|--------------|--------------|--------------|--------------|--------------|--------------|--------------|--------------|--------------|--------------|--------------|--------------|--------------|--------------|--------------|--------------|-----|--------------|--------------|-----|-----|
| -99          | -99          | -99          | -99          | -99          | -99          | -99          | -99          | -99          | -99          | -99          | -99          | -99          | -99          | -99          | -99          | -99          | -99          | -99          | -99          | -99 | -99          | 237          | -99 | -99 |
| -99          | -99          | -99          | -99          | -99          | -99          | -99          | -99          | -99          | -99          | -99          | -99          | -99          | -99          | -99          | -99          | -99          | -99          | -99          | -99          | -99 | -99          | -99          | -99 | -99 |
| -99          | -99          | -99          | -99          | -99          | -99          | -99          | -99          | -99          | -99          | -99          | -99          | -99          | -99          | -99          | -99          | -99          | -99          | -99          | -99          | -99 | -99          | -99          | -99 | -99 |
| -99          | -99          | -99          | -99          | -99          | -99          | -99          | -99          | -99          | -99          | -99          | -99          | -99          | -99          | -99          | -99          | -99          | -99          | -99          | -99          | -99 | -99          | -99          | -99 | -99 |
| -99          | -99          | -99          | -99          | -99          | -99          | -99          | -99          | -99          | -99          | -99          | -99          | -99          | -99          | -99          | -99          | -99          | -99          | -99          | -99          | -99 | -99          | -99          | -99 | -99 |
| 0,16919396   | 0,35693914   | 0,09597151   | 5,27711711   | 0,01297385   | 4,23613921   | 0,07714679   | 0,00000894   | 0,00896022   | 0,02024557   | 0,21729848   | 0,00102565   | 0,13302322   | 4,58127765   | 0,34121430   | 0,13055684   | 0,02451400   | 0,01857814   | 0,02508120   | 0,69387611   | 243 | 0,20902538   | 0,04007232   |     |     |
| 0,26706263   | 0,53412525   | 0,38375302   | 15,63004471  | 0,02193305   | 19,81127739  | 0,41329677   | 0,25283183   | 0,01408448   | 0,01671457   | 0,20408612   | 0,00095464   | 0,23573698   | 6,57162428   | 0,64405241   | 0,07521947   | 0,02284861   | 0,05533170   | 0,78689879   | 1,55967993   | 244 | 0,41415709   | 0,12597855   |     |     |
| -99          | -99          | -99          | -99          | -99          | -99          | -99          | -99          | -99          | -99          | -99          | -99          | -99          | -99          | -99          | -99          | -99          | -99          | -99          | -99          | -99 | -99          | -99          | -99 | -99 |
| 0,42713085   | 0,59946607   | 0,32822340   | 12,44720570  | 0,10502102   | 8,39046054   | 0,36875896   | 0,10685675   | 0,00375167   | 0,01414808   | 0,30286568   | 0,00607774   | 0,00855362   | 6,05761547   | 0,37729111   | 0,06646552   | 0,01799513   | 0,16399799   | 0,27985472   | 1,46687913   | 246 | 0,30223654   | 0,44434433   |     |     |
| -99          | -99          | -99          | -99          | -99          | -99          | -99          | -99          | -99          | -99          | -99          | -99          | -99          | -99          | -99          | -99          | -99          | -99          | -99          | -99          | -99 | -99          | -99          | -99 | -99 |
| 0,33394907   | 0,31264557   | 0,27027500   | 4,08858037   | 0,01220317   | 7,07877637   | 0,32583195   | 0,00001161   | 0,32268535   | 0,05346357   | 0,29027656   | 0,00901411   | 0,16999922   | 2,09812408   | 1,01557726   | 0,06570286   | 0,02746237   | 0,02247710   | 0,28530956   | 0,63437156   | 248 | 0,52631558   | 0,09177214   |     |     |
| 0,17500888   | 0,32342430   | 0,14685863   | 6,05656585   | 0,04595928   | 2,04840360   | 0,33022014   | 0,04922381   | 0,01005112   | 0,03954119   | 0,35367594   | 0,00347565   | 0,08249783   | 4,21490467   | 0,55305697   | 0,02236676   | 0,03032182   | 0,00498048   | 0,20243070   | 0,53905336   | 249 | 0,37332396   | 0,12882638   |     |     |
| -99          | -99          | -99          | -99          | -99          | -99          | -99          | -99          | -99          | -99          | -99          | -99          | -99          | -99          | -99          | -99          | -99          | -99          | -99          | -99          | -99 | -99          | -99          | -99 | -99 |
| 0,68717526   | 0,42742702   | 0,14021863   | 8,72859833   | 0,00366683   | 0,01836051   | 0,47360296   | 0,12867021   | 0,02643787   | 0,01956949   | 0,12911692   | 0,01055266   | 0,03286623   | 4,72642709   | 1,76021298   | 0,09887503   | 0,05096851   | 0,09004250   | 0,50865170   | 1,12955146   | 251 | 0,41143887   | 0,38709243   |     |     |
| -99          | -99          | -99          | -99          | -99          | -99          | -99          | -99          | -99          | -99          | -99          | -99          | -99          | -99          | -99          | -99          | -99          | -99          | -99          | -99          | -99 | -99          | -99          | -99 | -99 |
| -99          | -99          | -99          | -99          | -99          | -99          | -99          | -99          | -99          | -99          | -99          | -99          | -99          | -99          | -99          | -99          | -99          | -99          | -99          | -99          | -99 | -99          | -99          | -99 | -99 |
| -99          | -99          | -99          | -99          | -99          | -99          | -99          | -99          | -99          | -99          | -99          | -99          | -99          | -99          | -99          | -99          | -99          | -99          | -99          | -99          | -99 | -99          | -99          | -99 | -99 |
| -99          | -99          | -99          | -99          | -99          | -99          | -99          | -99          | -99          | -99          | -99          | -99          | -99          | -99          | -99          | -99          | -99          | -99          | -99          | -99          | -99 | -99          | -99          | -99 | -99 |
| 0,07048573   | 0,38039627   | 0,33921574   | 5,78122411   | 0,03639477   | 0,02249542   | 0,11494973   | 0,19466629   | 0,19549112   | 0,02386558   | 0,79398024   | 0,00983523   | 0,08334705   | 7,98601067   | 3,26385055   | 0,00204112   | 0,01761411   | 0,04568534   | 0,40971000   | 0,72035252   | 256 | 0,42518865   | 0,18480491   |     |     |
| -99          | -99          | -99          | -99          | -99          | -99          | -99          | -99          | -99          | -99          | -99          | -99          | -99          | -99          | -99          | -99          | -99          | -99          | -99          | -99          | -99 | -99          | -99          | -99 | -99 |
| -99          | -99          | -99          | -99          | -99          | -99          | -99          | -99          | -99          | -99          | -99          | -99          | -99          | -99          | -99          | -99          | -99          | -99          | -99          | -99          | -99 | -99          | -99          | -99 | -99 |
| 0,47755871   | 0,54478164   | 0,31376362   | 6,82935817   | 0,02913203   | 16,87423274  | 0,15742647   | 0,09367124   | 0,13790532   | 0,03884170   | 0,59039401   | 0,00897887   | 0,20571943   | 5,22977906   | 0,70698426   | 0,10993708   | 0,03919328   | 0,06048621   | 0,16399799   | 1,45372058   | 259 | 0,37390664   | 0,14566741   |     |     |
| -99          | -99          | -99          | -99          | -99          | -99          | -99          | -99          | -99          | -99          | -99          | -99          | -99          | -99          | -99          | -99          | -99          | -99          | -99          | -99          | -99 | -99          | -99          | -99 | -99 |
| 0,16391843   | 0,28119639   | 0,22635358   | 8,52884275   | 0,03263242   | 12,53986577  | 0,66298586   | 0,20240965   | 0,01188141   | 0,02919267   | 0,26037268   | 0,01416083   | 0,12846524   | 2,98028438   | 3,64608956   | 0,00791854   | 0,01281387   | 0,13900898   | 0,07770493   | 1,22616234   | 261 | 0,37575130   | 0,39328580   |     |     |
| 0,17899609   | 0,46716367   | 0,52558645   | 7,63696811   | 0,02399704   | 10,83779982  | 0,83973149   | 0,40276215   | 0,03417298   | 0,01737311   | 0,18633880   | 0,00569930   | 0,17924441   | 5,74776071   | 0,96861819   | 0,02293985   | 0,04313492   | 0,23667841   | 0,33962157   | 3,15141554   | 262 | 0,35330841   | 0,17111048   |     |     |
| -99          | -99          | -99          | -99          | -99          | -99          | -99          | -99          | -99          | -99          | -99          | -99          | -99          | -99          | -99          | -99          | -99          | -99          | -99          | -99          | -99 | -99          | -99          | -99 | -99 |
| 0,17262939   | 0,22294349   | 0,22048463   | 1,51440387   | 0,07472579   | 6,99706552   | 0,20643364   | 0,13228762   | 0,01256670   | 0,01307314   | 0,08818946   | 0,00210167   | 0,09136276   | 2,28588052   | 0,59822081   | 0,07915092   | 0,01872033   | 0,03825388   | 0,12663517   | 0,66792129   | 264 | 0,13155610   | 0,09819205   |     |     |
| -99,00000000 | -99,00000000 | -99,00000000 | -99,00000000 | -99,00000000 | -99,00000000 | -99,00000000 | -99,00000000 | -99,00000000 | -99,00000000 | -99,00000000 | -99,00000000 | -99,00000000 | -99,00000000 | -99,00000000 | -99,00000000 | -99,00000000 | -99,00000000 | -99,00000000 | -99,00000000 | 265 | -99,00000000 | -99,00000000 |     |     |

JKI Shelter\_Co [68015]

| 50                 | 32                                         | 31                       | 28                                      | 19                            | 26                               | 5                         | 36                                      | 20                       | 29                  | 14                  | 30                                         | 9                              | 13                                                | 2                                | 18                                          | 16          | 10           | 7                               | 34                    |
|--------------------|--------------------------------------------|--------------------------|-----------------------------------------|-------------------------------|----------------------------------|---------------------------|-----------------------------------------|--------------------------|---------------------|---------------------|--------------------------------------------|--------------------------------|---------------------------------------------------|----------------------------------|---------------------------------------------|-------------|--------------|---------------------------------|-----------------------|
| Reticuline_oxidase | Serine-threonine_protein_kinase_plant-type | TMV_resistance_protein_N | Homoserine_dehydrog_nase_family_protein | Cc-nbs-lrr_resistance_protein | UDP-glucose:glucosyltransfe_rase | Methionyl-trNA_synthetase | 70_kDa_subunit_of_replication_protein_A | Gene_of_unknown_function | RING_finger_protein | Flagellin-sensing 2 | Serine-threonine_protein kinase_plant-type | TIR-NBS-LRR_disease_resistance | LRR receptor-like serine/threonine-protein kinase | Poly(ADP-ribose)_glyco_hydrolase | Bacterial_spot_disease_resistance_protein_4 | Extensin    | Lipoxygenase | Betaine_aldeh_yde_dehydrogenase | Fatty_acid_desaturase |
| PGSC0003           | PGSC0003                                   | PGSC0003                 | PGSC0003                                | PGSC0003                      | PGSC0003                         | PGSC0003                  | PGSC0003                                | PGSC0003                 | PGSC0003            | PGSC0003            | PGSC0003                                   | PGSC0003                       | PGSC0003                                          | PGSC0003                         | PGSC0003                                    | PGSC0003    | PGSC0003     | PGSC0003                        | PGSC0003              |
| DMT40004630        | DMT40004644                                | DMT40004689              | DMT40004811                             | DMT40004909                   | DMT40004912                      | DMT40004917               | DMT40005251                             | DMT40006237              | DMT40006687         | DMT40006877         | DMT40006878                                | DMT40007144                    | DMT40007188                                       | DMT40007551                      | DMT40008081                                 | DMT40008201 | DMT40008202  | DMT40008302                     | DMT40008385           |
| 4,80071736         | 0,06080147                                 | 0,10808588               | 0,11058672                              | 0,15127547                    | 3,01101522                       | 0,16202069                | 0,14898614                              | 0,00001309               | 1,14969406          | 0,04207917          | 0,01984955                                 | 0,84337724                     | 0,17902711                                        | 1,00643221                       | 0,15509779                                  | 2,23496153  | 3,68394111   | 0,57285821                      | 0,16247053            |
| -99                | -99                                        | -99                      | -99                                     | -99                           | -99                              | -99                       | -99                                     | -99                      | -99                 | -99                 | -99                                        | -99                            | -99                                               | -99                              | -99                                         | -99         | -99          | -99                             | -99                   |
| -99                | -99                                        | -99                      | -99                                     | -99                           | -99                              | -99                       | -99                                     | -99                      | -99                 | -99                 | -99                                        | -99                            | -99                                               | -99                              | -99                                         | -99         | -99          | -99                             | -99                   |
| -99                | -99                                        | -99                      | -99                                     | -99                           | -99                              | -99                       | -99                                     | -99                      | -99                 | -99                 | -99                                        | -99                            | -99                                               | -99                              | -99                                         | -99         | -99          | -99                             | -99                   |
| -99                | -99                                        | -99                      | -99                                     | -99                           | -99                              | -99                       | -99                                     | -99                      | -99                 | -99                 | -99                                        | -99                            | -99                                               | -99                              | -99                                         | -99         | -99          | -99                             | -99                   |
| 1,50707373         | 0,05128746                                 | 0,06688145               | 0,06541431                              | 0,22921129                    | 4,17492419                       | 0,10745094                | 0,12602222                              | 0,02296770               | 1,09258839          | 0,03223451          | 0,03651796                                 | 0,17334883                     | 0,15185328                                        | 1,13504540                       | 0,12929604                                  | 2,62396777  | 2,74679644   | 0,92066614                      | 0,03754462            |
| -99                | -99                                        | -99                      | -99                                     | -99                           | -99                              | -99                       | -99                                     | -99                      | -99                 | -99                 | -99                                        | -99                            | -99                                               | -99                              | -99                                         | -99         | -99          | -99                             | -99                   |
| -99                | -99                                        | -99                      | -99                                     | -99                           | -99                              | -99                       | -99                                     | -99                      | -99                 | -99                 | -99                                        | -99                            | -99                                               | -99                              | -99                                         | -99         | -99          | -99                             | -99                   |
| -99                | -99                                        | -99                      | -99                                     | -99                           | -99                              | -99                       | -99                                     | -99                      | -99                 | -99                 | -99                                        | -99                            | -99                                               | -99                              | -99                                         | -99         | -99          | -99                             | -99                   |
| -99                | -99                                        | -99                      | -99                                     | -99                           | -99                              | -99                       | -99                                     | -99                      | -99                 | -99                 | -99                                        | -99                            | -99                                               | -99                              | -99                                         | -99         | -99          | -99                             | -99                   |
| -99                | -99                                        | -99                      | -99                                     | -99                           | -99                              | -99                       | -99                                     | -99                      | -99                 | -99                 | -99                                        | -99                            | -99                                               | -99                              | -99                                         | -99         | -99          | -99                             | -99                   |
| -99                | -99                                        | -99                      | -99                                     | -99                           | -99                              | -99                       | -99                                     | -99                      | -99                 | -99                 | -99                                        | -99                            | -99                                               | -99                              | -99                                         | -99         | -99          | -99                             | -99                   |
| -99                | -99                                        | -99                      | -99                                     | -99                           | -99                              | -99                       | -99                                     | -99                      | -99                 | -99                 | -99                                        | -99                            | -99                                               | -99                              | -99                                         | -99         | -99          | -99                             | -99                   |
| -99                | -99                                        | -99                      | -99                                     | -99                           | -99                              | -99                       | -99                                     | -99                      | -99                 | -99                 | -99                                        | -99                            | -99                                               | -99                              | -99                                         | -99         | -99          | -99                             | -99                   |
| -99                | -99                                        | -99                      | -99                                     | -99                           | -99                              | -99                       | -99                                     | -99                      | -99                 | -99                 | -99                                        | -99                            | -99                                               | -99                              | -99                                         | -99         | -99          | -99                             | -99                   |
| -99                | -99                                        | -99                      | -99                                     | -99                           | -99                              | -99                       | -99                                     | -99                      | -99                 | -99                 | -99                                        | -99                            | -99                                               | -99                              | -99                                         | -99         | -99          | -99                             | -99                   |
| -99                | -99                                        | -99                      | -99                                     | -99                           | -99                              | -99                       | -99                                     | -99                      | -99                 | -99                 | -99                                        | -99                            | -99                                               | -99                              | -99                                         | -99         | -99          | -99                             | -99                   |
| 3,67183187         | 0,04984180                                 | 0,05163525               | 0,14849641                              | 0,22151864                    | 4,08829698                       | 0,16718299                | 0,11928628                              | 0,03808852               | 1,40883241          | 0,01056546          | 0,01386412                                 | 0,23285439                     | 0,19458872                                        | 1,42849897                       | 0,20215027                                  | 4,64120686  | 6,05236922   | 1,47171672                      | 0,06153282            |
| 1,93656510         | 0,15109209                                 | 0,06295654               | 0,05634768                              | 0,16741492                    | 3,94083132                       | 0,09430643                | 0,37487980                              | 0,00687941               | 1,18632558          | 0,07538911          | 0,04912155                                 | 0,20131129                     | 0,43062381                                        | 0,70686176                       | 0,25112891                                  | 6,09446677  | 10,14361508  | 0,63794325                      | 0,03042709            |
| 3,67246820         | 0,05269281                                 | 0,03068654               | 0,04835303                              | 0,18579068                    | 6,46992954                       | 0,09491303                | 0,05750176                              | 0,01514253               | 2,79480960          | 0,01219768          | 0,00959002                                 | 0,73293136                     | 0,29254896                                        | 0,69243473                       | 0,45588758                                  | 14,86399483 | 5,37680817   | 0,34959344                      | 0,19584036            |
| 5,06302638         | 0,01327633                                 | 0,04812732               | 0,06497371                              | 0,17361939                    | 1,03168318                       | 0,12090954                | 0,35551935                              | 0,32331223               | 1,19499210          | 0,03224010          | 0,02122635                                 | 0,62243712                     | 0,23915204                                        | 0,93238649                       | 0,03922755                                  | 3,90683412  | 2,94649537   | 0,99102956                      | 0,03700849            |
| -99                | -99                                        | -99                      | -99                                     | -99                           | -99                              | -99                       | -99                                     | -99                      | -99                 | -99                 | -99                                        | -99                            | -99                                               | -99                              | -99                                         | -99         | -99          | -99                             | -99                   |
| -99                | -99                                        | -99                      | -99                                     | -99                           | -99                              | -99                       | -99                                     | -99                      | -99                 | -99                 | -99                                        | -99                            | -99                                               | -99                              | -99                                         | -99         | -99          | -99                             | -99                   |
| -99                | -99                                        | -99                      | -99                                     | -99                           | -99                              | -99                       | -99                                     | -99                      | -99                 | -99                 | -99                                        | -99                            | -99                                               | -99                              | -99                                         | -99         | -99          | -99                             | -99                   |
| -99                | -99                                        | -99                      | -99                                     | -99                           | -99                              | -99                       | -99                                     | -99                      | -99                 | -99                 | -99                                        | -99                            | -99                                               | -99                              | -99                                         | -99         | -99          | -99                             | -99                   |
| -99                | -99                                        | -99                      | -99                                     | -99                           | -99                              | -99                       | -99                                     | -99                      | -99                 | -99                 | -99                                        | -99                            | -99                                               | -99                              | -99                                         | -99         | -99          | -99                             | -99                   |
| -99                | -99                                        | -99                      | -99                                     | -99                           | -99                              | -99                       | -99                                     | -99                      | -99                 | -99                 | -99                                        | -99                            | -99                                               | -99                              | -99                                         | -99         | -99          | -99                             | -99                   |
| 2,06981238         | 0,06650009                                 | 0,14706237               | 0,00001498                              | 0,09824311                    | 2,55000487                       | 0,14058358                | 1,40785622                              | 0,10878111               | 3,91089824          | 0,03970598          | 0,06187498                                 | 0,40937645                     | 0,11183937                                        | 0,40262258                       | 0,16465292                                  | 2,71414914  | 2,93731909   | 0,00001498                      | 0,00837033            |
| -99                | -99                                        | -99                      | -99                                     | -99                           | -99                              | -99                       | -99                                     | -99                      | -99                 | -99                 | -99                                        | -99                            | -99                                               | -99                              | -99                                         | -99         | -99          | -99                             | -99                   |
| -99                | -99                                        | -99                      | -99                                     | -99                           | -99                              | -99                       | -99                                     | -99                      | -99                 | -99                 | -99                                        | -99                            | -99                                               | -99                              | -99                                         | -99         | -99          | -99                             | -99                   |
| -99                | -99                                        | -99                      | -99                                     | -99                           | -99                              | -99                       | -99                                     | -99                      | -99                 | -99                 | -99                                        | -99                            | -99                                               | -99                              | -99                                         | -99         | -99          | -99                             | -99                   |
| -99                | -99                                        | -99                      | -99                                     | -99                           | -99                              | -99                       | -99                                     | -99                      | -99                 | -99                 | -99                                        | -99                            | -99                                               | -99                              | -99                                         | -99         | -99          | -99                             | -99                   |
| -99                | -99                                        | -99                      | -99                                     | -99                           | -99                              | -99                       | -99                                     | -99                      | -99                 | -99                 | -99                                        | -99                            | -99                                               | -99                              | -99                                         | -99         | -99          | -99                             | -99                   |
| -99                | -99                                        | -99                      | -99                                     | -99                           | -99                              | -99                       | -99                                     | -99                      | -99                 | -99                 | -99                                        | -99                            | -99                                               | -99                              | -99                                         | -99         | -99          | -99                             | -99                   |
| -99                | -99                                        | -99                      | -99                                     | -99                           | -99                              | -99                       | -99                                     | -99                      | -99                 | -99                 | -99                                        | -99                            | -99                                               | -99                              | -99                                         | -99         | -99          | -99                             | -99                   |
| -99                | -99                                        | -99                      | -99                                     | -99                           | -99                              | -99                       | -99                                     | -99                      | -99                 | -99                 | -99                                        | -99                            | -99                                               | -99                              | -99                                         | -99         | -99          | -99                             | -99                   |
| -99                | -99                                        | -99                      | -99                                     | -99                           | -99                              | -99                       | -99                                     | -99                      | -99                 | -99                 | -99                                        | -99                            | -99                                               | -99                              | -99                                         | -99         | -99          | -99                             | -99                   |
| 2,71414914         | 0,04685998                                 | 0,14314012               | 0,04153582                              | 0,04653629                    | 2,41579829                       | 0,08266956                | 0,62741851                              | 0,02840916               | 2,03848876          | 0,04387369          | 0,02876583                                 | 0,57137111                     | 0,16261137                                        | 0,60941630                       | 0,19164390                                  | 0,97164418  | 1,94733353   | 0,66411270                      | 0,03027981            |
| -99                | -99                                        | -99                      | -99                                     | -99                           | -99                              | -99                       | -99                                     | -99                      | -99                 | -99                 | -99                                        | -99                            | -99                                               | -99                              | -99                                         | -99         | -99          | -99                             | -99                   |
| 3,73601436         | 0,25801020                                 | 0,03926806               | 0,06265181                              | 0,30260338                    | 4,01527834                       | 0,05382798                | 0,31414445                              | 0,03292894               | 0,89161945          | 0,05371616          | 0,04424015                                 | 0,76710714                     | 1,14195041                                        | 2,51141422                       | 0,76817132                                  | 33,30114783 | 26,88072231  | 1,74291233                      | 0,06517669            |
| -99                | -99                                        | -99                      | -99                                     | -99                           | -99                              | -99                       | -99                                     | -99                      | -99                 | -99                 | -99                                        | -99                            | -99                                               | -99                              | -99                                         | -99         | -99          | -99                             | -99                   |
| -99                | -99                                        | -99                      | -99                                     | -99                           | -99                              | -99                       | -99                                     | -99                      | -99                 | -99                 | -99                                        | -99                            | -99                                               | -99                              | -99                                         | -99         | -99          | -99                             | -99                   |
| -99                | -99                                        | -99                      | -99                                     | -99                           | -99                              | -99                       | -99                                     | -99                      | -99                 | -99                 | -99                                        | -99                            | -99                                               | -99                              | -99                                         | -99         | -99          | -99                             | -99                   |
| -99                | -99                                        | -99                      | -99                                     | -99                           | -99                              | -99                       | -99                                     | -99                      | -99                 | -99                 | -99                                        | -99                            | -99                                               | -99                              | -99                                         | -99         | -99          | -99                             | -99                   |
| -99                | -99                                        | -99                      | -99                                     | -99                           | -99                              | -99                       | -99                                     | -99                      | -99                 | -99                 | -99                                        | -99                            | -99                                               | -99                              | -99                                         | -99         | -99          | -99                             | -99                   |
| -99                | -99                                        | -99                      | -99                                     | -99                           | -99                              | -99                       | -99                                     | -99                      | -99                 | -99                 | -99                                        | -99                            | -99                                               | -99                              | -99                                         | -99         | -99          | -99                             | -99                   |
| 1,26137741         | 0,05683802                                 | 0,05194037               | 0,03340019                              | 0,19533197                    | 2,84021472                       | 0,12560798                | 0,13276990                              | 0,01803571               | 1,33329868          | 0,00468414          | 0,00875304                                 | 0,09239765                     | 0,45691573                                        | 3,98339901                       | 0,14299137                                  | 5,63337691  | 11,69645959  | 1,02740144                      | 0,13378609            |
| -99                | -99                                        | -99                      | -99                                     | -99                           | -99                              | -99                       | -99                                     | -99                      | -99                 | -99                 | -99                                        | -99                            | -99                                               | -99                              | -99                                         | -99         | -99          | -99                             | -99                   |
| -99                | -99                                        | -99                      | -99                                     | -99                           | -99                              | -99                       | -99                                     | -99                      | -99                 | -99                 | -99                                        | -99                            | -99                                               | -99                              | -99                                         | -99         | -99          | -99                             | -99                   |
| -99                | -99                                        | -99                      | -99                                     | -99                           | -99                              | -99                       | -99                                     | -99                      | -99                 | -99                 | -99                                        | -99                            | -99                                               | -99                              | -99                                         | -99         | -99          | -99                             | -99                   |
| -99                | -99                                        | -99                      | -99                                     | -99                           | -99                              | -99                       | -99                                     | -99                      | -99                 | -99                 | -99                                        | -99                            | -99                                               | -99                              | -99                                         | -99         | -99          | -99                             | -99                   |
| 2,12027295         | 0,02484759                                 | 0,05544688               | 0,02884070                              | 0,28862136                    | 2,02686500                       | 0,03675922                | 0,00072399                              | 0,00277605               | 0,52677179          | 0,01887015          | 0,01441036                                 | 0,41301040                     | 0,33546868                                        | 1,27213343                       | 0,23985759                                  | 8,31231312  | 12,73078963  | 0,81295646                      | 0,04773694            |
| -99                | -99                                        | -99                      | -99                                     | -99                           | -99                              | -99                       | -99                                     | -99                      | -99                 | -99                 | -99                                        | -99                            | -99                                               | -99                              | -99                                         | -99         | -99          | -99                             | -99                   |
| -99                | -99                                        | -99                      | -99                                     | -99                           | -99                              | -99                       | -99                                     | -99                      | -99                 | -99                 | -99                                        | -99                            | -99                                               | -99                              | -99                                         | -99         | -99          | -99                             | -99                   |
| -99                | -99                                        | -99                      | -99                                     | -99                           | -99                              | -99                       | -99                                     | -99                      | -99                 | -99                 | -99                                        | -99                            | -99                                               | -99                              | -99                                         | -99         | -99          | -99                             | -99                   |
| -99                | -99                                        | -99                      | -99                                     | -99                           | -99                              | -99                       | -99                                     | -99                      | -99                 | -99                 | -99                                        | -99                            | -99                                               | -99                              | -99                                         | -99         | -99          | -99                             | -99                   |
| 2,32543401         | 0,06481628                                 | 0,10370088               | 0,11253924                              | 0,12722905                    | 4,28857990                       | 0,18042861                | 0,00704346                              | 0,09668930               | 1,12466864          | 0,01547947          | 0,02572830                                 | 0,53384765                     | 1,17242855                                        | 3,11557835                       | 0,19580642                                  | 23,62921834 | 20,48505697  | 1,54274541                      | 0,34615738            |
| -99                | -99                                        | -99                      | -99                                     | -99                           | -99                              | -99                       | -99                                     | -99                      | -99                 | -99                 | -99                                        | -99                            | -99                                               | -99                              | -99                                         | -99         | -99          | -99                             | -99                   |
| -99                | -99                                        | -99                      | -99                                     | -99                           | -99                              | -99                       | -99                                     | -99                      | -99                 | -99                 | -99                                        | -99                            | -99                                               | -99                              | -99                                         | -99         | -99          | -99                             | -99                   |
| -99                | -99                                        | -99                      | -99                                     | -99                           | -99                              | -99                       | -99                                     | -99                      | -99                 | -99                 | -99                                        | -99                            | -99                                               | -99                              | -99                                         | -99         | -99          | -99                             | -99                   |
| 3,74833527         | 0,07121130                                 | 0,13872022               | 0,10303811                              | 0,40704212                    | 2,34770315                       | 0,07972909                | 0,23152662                              | 0,07978437               | 0,91970941          | 0,01158378          | 0,00683070                                 | 0,34156925                     | 0,47508251                                        | 1,54354763                       | 0,11600428                                  | 11,22971960 | 7,95162654   | 1,97691385                      | 0,12185607            |
| 3,39167986         | 0,08071608                                 | 0,05900578               | 0,08338895                              | 0,19546741                    | 2,45547137                       | 0,07796660                | 0,03711124                              | 0,02520755               | 0,66434291          | 0,01487465          | 0,01448798                                 | 0,21975989                     | 0,29730178                                        | 0,93952275                       | 0,41812320                                  | 9,78112222  | 4,03061504   | 1,19333574                      | 0,08863375            |
| 1,72010901         | 0,05729289                                 | 0,06119256               | 0,05188639                              | 0,07848169                    | 2,07555908                       | 0,03437492                | 0,26489637                              | 0,00834137               | 1,01501426          | 0,03216198          | 0,01039836                                 | 0,395980                       |                                                   |                                  |                                             |             |              |                                 |                       |



[illegible]

|              |              |              |              |              |              |              |              |              |              |              |              |              |              |              |              |              |              |              |              |     |              |            |
|--------------|--------------|--------------|--------------|--------------|--------------|--------------|--------------|--------------|--------------|--------------|--------------|--------------|--------------|--------------|--------------|--------------|--------------|--------------|--------------|-----|--------------|------------|
| -99          | -99          | -99          | -99          | -99          | -99          | -99          | -99          | -99          | -99          | -99          | -99          | -99          | -99          | -99          | -99          | -99          | -99          | -99          | -99          | 237 | -99          | -99        |
| -99          | -99          | -99          | -99          | -99          | -99          | -99          | -99          | -99          | -99          | -99          | -99          | -99          | -99          | -99          | -99          | -99          | -99          | -99          | -99          | -99 | -99          | -99        |
| -99          | -99          | -99          | -99          | -99          | -99          | -99          | -99          | -99          | -99          | -99          | -99          | -99          | -99          | -99          | -99          | -99          | -99          | -99          | -99          | -99 | -99          | -99        |
| -99          | -99          | -99          | -99          | -99          | -99          | -99          | -99          | -99          | -99          | -99          | -99          | -99          | -99          | -99          | -99          | -99          | -99          | -99          | -99          | -99 | -99          | -99        |
| -99          | -99          | -99          | -99          | -99          | -99          | -99          | -99          | -99          | -99          | -99          | -99          | -99          | -99          | -99          | -99          | -99          | -99          | -99          | -99          | -99 | -99          | -99        |
| 2,49277039   | 0,02703084   | 0,02562596   | 0,08782345   | 0,10465767   | 4,43136143   | 0,06532369   | 0,05899555   | 0,00295372   | 0,78336143   | 0,03022215   | 0,02744620   | 0,44836638   | 0,14168412   | 0,85307826   | 0,30858717   | 3,93332664   | 7,61450366   | 0,70210076   | 0,05383730   | 243 | 4,99159194   | 0,13932248 |
| 4,99072704   | 0,03389579   | 0,07511527   | 0,04959196   | 0,27667228   | 2,92462165   | 0,11552284   | 0,02319970   | 0,03195643   | 0,72208972   | 0,01657612   | 0,01274654   | 0,25004333   | 0,17964865   | 0,90893561   | 0,03923405   | 3,70185914   | 2,15583984   | 0,68313850   | 0,01122804   | 244 | 5,88278781   | 0,16637378 |
| -99          | -99          | -99          | -99          | -99          | -99          | -99          | -99          | -99          | -99          | -99          | -99          | -99          | -99          | -99          | -99          | -99          | -99          | -99          | -99          | -99 | -99          | -99        |
| 3,49610860   | 0,11271489   | 0,06141564   | 0,14997043   | 0,00003339   | 2,10489753   | 0,05738232   | 0,19652027   | 0,01686002   | 0,78881014   | 0,03474020   | 0,03952064   | 0,36978279   | 0,17589056   | 1,18160677   | 0,01865557   | 0,00003339   | 1,67220300   | 0,34838393   | 0,07339115   | 246 | 3,62441963   | 0,25362168 |
| -99          | -99          | -99          | -99          | -99          | -99          | -99          | -99          | -99          | -99          | -99          | -99          | -99          | -99          | -99          | -99          | -99          | -99          | -99          | -99          | -99 | -99          | -99        |
| 3,27342290   | 0,24732843   | 0,08071608   | 0,10353568   | 0,17547045   | 4,75056794   | 0,09625465   | 0,23569613   | 0,01696141   | 0,71251881   | 0,06446232   | 0,07098215   | 0,43627206   | 0,59687470   | 0,70495350   | 0,29594480   | 8,47844682   | 6,10165242   | 1,05870452   | 0,04805399   | 248 | 6,30173899   | 0,38070621 |
| 1,59936586   | 0,15642034   | 0,21278967   | 0,02082557   | 0,20668420   | 1,23071781   | 0,11546280   | 0,02382302   | 0,04185373   | 2,28706917   | 0,01804196   | 0,05257424   | 0,41250971   | 0,09509412   | 0,89100164   | 0,04874844   | 1,67191326   | 3,05569384   | 0,70344035   | 0,06898851   | 249 | 2,40077467   | 0,16003951 |
| -99          | -99          | -99          | -99          | -99          | -99          | -99          | -99          | -99          | -99          | -99          | -99          | -99          | -99          | -99          | -99          | -99          | -99          | -99          | -99          | -99 | -99          | -99        |
| 4,18361473   | 0,21209022   | 0,09901219   | 0,05075698   | 0,10465767   | 3,80989173   | 0,07283370   | 0,28141088   | 0,01572005   | 1,07307432   | 0,08583739   | 0,04139929   | 0,54101856   | 0,30181784   | 1,00329788   | 0,05928250   | 1,94902149   | 2,93579249   | 0,56634379   | 0,04412530   | 251 | 4,13174151   | 0,18221959 |
| -99          | -99          | -99          | -99          | -99          | -99          | -99          | -99          | -99          | -99          | -99          | -99          | -99          | -99          | -99          | -99          | -99          | -99          | -99          | -99          | -99 | -99          | -99        |
| -99          | -99          | -99          | -99          | -99          | -99          | -99          | -99          | -99          | -99          | -99          | -99          | -99          | -99          | -99          | -99          | -99          | -99          | -99          | -99          | -99 | -99          | -99        |
| -99          | -99          | -99          | -99          | -99          | -99          | -99          | -99          | -99          | -99          | -99          | -99          | -99          | -99          | -99          | -99          | -99          | -99          | -99          | -99          | -99 | -99          | -99        |
| -99          | -99          | -99          | -99          | -99          | -99          | -99          | -99          | -99          | -99          | -99          | -99          | -99          | -99          | -99          | -99          | -99          | -99          | -99          | -99          | -99 | -99          | -99        |
| 1,58950219   | 0,07748039   | 0,09513203   | 0,01936473   | 0,27631293   | 3,53564886   | 0,05295736   | 0,21188818   | 0,01982102   | 1,51306608   | 0,05561335   | 0,02851125   | 0,22197591   | 0,08382794   | 1,47383498   | 0,01388311   | 1,53068243   | 1,42037808   | 0,91635277   | 0,09500024   | 256 | 6,19992172   | 0,07600562 |
| -99          | -99          | -99          | -99          | -99          | -99          | -99          | -99          | -99          | -99          | -99          | -99          | -99          | -99          | -99          | -99          | -99          | -99          | -99          | -99          | -99 | -99          | -99        |
| -99          | -99          | -99          | -99          | -99          | -99          | -99          | -99          | -99          | -99          | -99          | -99          | -99          | -99          | -99          | -99          | -99          | -99          | -99          | -99          | -99 | -99          | -99        |
| 3,72373395   | 0,06331758   | 0,18158916   | 0,06433511   | 0,10932915   | 1,29123358   | 0,11685165   | 0,39714837   | 0,01744249   | 0,95843334   | 0,03626571   | 0,01750305   | 0,68242859   | 0,26457525   | 0,70502680   | 0,19167711   | 3,34672498   | 5,95354926   | 0,63938198   | 0,06446903   | 259 | 3,23496477   | 0,19502757 |
| -99          | -99          | -99          | -99          | -99          | -99          | -99          | -99          | -99          | -99          | -99          | -99          | -99          | -99          | -99          | -99          | -99          | -99          | -99          | -99          | -99 | -99          | -99        |
| 4,76987018   | 0,12987089   | 0,06553230   | 0,04299313   | 0,08690904   | 2,41990431   | 0,11643123   | 0,48874370   | 0,03931844   | 1,07754640   | 0,05362130   | 0,07109786   | 0,17143695   | 0,31851870   | 1,05602940   | 0,08244924   | 7,94556604   | 4,39861704   | 0,14788524   | 0,07919483   | 261 | 1,86833091   | 0,07904127 |
| 4,15255708   | 0,09645501   | 0,03450621   | 0,06712528   | 0,27376312   | 4,34693945   | 0,09665579   | 0,24299525   | 0,08808255   | 1,12661923   | 0,02463751   | 0,03550091   | 0,81620305   | 0,35650643   | 1,12272142   | 0,09453550   | 5,63337691   | 3,80000153   | 1,60213976   | 0,06973371   | 262 | 5,67157725   | 0,13394847 |
| -99          | -99          | -99          | -99          | -99          | -99          | -99          | -99          | -99          | -99          | -99          | -99          | -99          | -99          | -99          | -99          | -99          | -99          | -99          | -99          | -99 | -99          | -99        |
| 1,57543475   | 0,07385042   | 0,08436275   | 0,06057012   | 0,25134659   | 2,36813282   | 0,03641685   | 0,02027365   | 0,00466713   | 0,59697814   | 0,01879835   | 0,00770361   | 0,26789694   | 1,21230272   | 3,23945249   | 0,59615112   | 32,08328586  | 13,09323782  | 0,52331445   | 0,06509768   | 264 | 4,01249613   | 0,07419676 |
| -99,00000000 | -99,00000000 | -99,00000000 | -99,00000000 | -99,00000000 | -99,00000000 | -99,00000000 | -99,00000000 | -99,00000000 | -99,00000000 | -99,00000000 | -99,00000000 | -99,00000000 | -99,00000000 | -99,00000000 | -99,00000000 | -99,00000000 | -99,00000000 | -99,00000000 | -99,00000000 | 265 | -99,00000000 | 0,30939033 |

| JKI Shelter_Ds [68015]                                    |                               |                     |              |                                |               |                                    |                         |                                    |                                            |              |                                                       |                                                       |                         |                                                             |                                               |                                          |                                                  |                                         |               |                                 |                        |            |  |  |  |  | Location_<br>Treatment |
|-----------------------------------------------------------|-------------------------------|---------------------|--------------|--------------------------------|---------------|------------------------------------|-------------------------|------------------------------------|--------------------------------------------|--------------|-------------------------------------------------------|-------------------------------------------------------|-------------------------|-------------------------------------------------------------|-----------------------------------------------|------------------------------------------|--------------------------------------------------|-----------------------------------------|---------------|---------------------------------|------------------------|------------|--|--|--|--|------------------------|
| 27                                                        | 47                            | 38                  | 23           | 25                             | 54            | 45                                 | 1                       | 66                                 | 22                                         | 35           | 17                                                    | 57                                                    | 21                      | 6                                                           | 8                                             | 3                                        | 24                                               | 33                                      | 15            | 4                               | 50                     |            |  |  |  |  |                        |
| Glutamyl-<br>tRNA(Gln)_amido<br>transferase_subu<br>nit_A | (S)-norcoclaurine<br>synthase | Cytochrome_<br>P450 | PR1_protein  | Beta-D-glucan_<br>exohydrolase | SBT4B_protein | Ethylene-<br>inducing_<br>xylanase | Glucosyltrans<br>ferase | Nbs-<br>lrr_resistance_<br>protein | Acidic_class_II<br>_1_3-beta-<br>glucanase | Hcr9-OR2A    | Serine-<br>threonine<br>protein kinase,<br>plant-type | Gamma_<br>aminobutyrate<br>_transaminase<br>_isomorf1 | O-methyltrans<br>ferase | Multidrug_resistance<br>_protein_ABC_trans<br>porter_family | BED_finger-nbs-<br>lrr_resistance_<br>protein | S-locus-<br>specific_glyco<br>protein_S6 | NADPH-<br>dependent_<br>doline_4-<br>hydroxylase | Desacetoxyn<br>doline_4-<br>hydroxylase | Ranking       | Receptor_<br>protein_<br>kinase | Reticuline_<br>oxidase |            |  |  |  |  |                        |
| PGSC0003                                                  | PGSC0003                      | PGSC0003            | PGSC0003     | PGSC0003                       | PGSC0003      | PGSC0003                           | PGSC0003                | PGSC0003                           | PGSC0003                                   | PGSC0003     | PGSC0003                                              | PGSC0003                                              | PGSC0003                | PGSC0003                                                    | PGSC0003                                      | PGSC0003                                 | PGSC0003                                         | PGSC0003                                | Transcript ID | PGSC0003                        | PGSC0003               | PGSC0003   |  |  |  |  |                        |
| DMT400008092                                              | DMT400008278                  | DMT400008547        | DMT400013094 | DMT400015224                   | DMT400017633  | DMT400020366                       | DMT400021019            | DMT400021608                       | DMT400022720                               | DMT400022779 | DMT400002843                                          | DMT400030368                                          | DMT400031370            | DMT400031714                                                | DMT400033714                                  | DMT40003602                              | DMT40003748                                      | DMT400041989                            | DMT40004236   | DMT40004568                     | DMT40004630            |            |  |  |  |  |                        |
| 0,03836674                                                | 0,08777780                    | 0,60248616          | 0,01256017   | 0,05831456                     | 1,98068574    | 0,02580868                         | 0,05675928              | 0,00888754                         | 0,01254277                                 | 0,00172762   | 0,03481855                                            | 3,57266341                                            | 0,51978972              | 0,15410654                                                  | 0,01917008                                    | 0,20632635                               | 0,96259444                                       | 0,24861754                              | 1             | 0,26407141                      | 0,00082119             | 2,59008600 |  |  |  |  |                        |
| -99                                                       | -99                           | -99                 | -99          | -99                            | -99           | -99                                | -99                     | -99                                | -99                                        | -99          | -99                                                   | -99                                                   | -99                     | -99                                                         | -99                                           | -99                                      | -99                                              | -99                                     | 2             | -99                             | -99                    | -99        |  |  |  |  |                        |
| -99                                                       | -99                           | -99                 | -99          | -99                            | -99           | -99                                | -99                     | -99                                | -99                                        | -99          | -99                                                   | -99                                                   | -99                     | -99                                                         | -99                                           | -99                                      | -99                                              | -99                                     | 3             | -99                             | -99                    | -99        |  |  |  |  |                        |
| -99                                                       | -99                           | -99                 | -99          | -99                            | -99           | -99                                | -99                     | -99                                | -99                                        | -99          | -99                                                   | -99                                                   | -99                     | -99                                                         | -99                                           | -99                                      | -99                                              | -99                                     | 4             | -99                             | -99                    | -99        |  |  |  |  |                        |
| -99                                                       | -99                           | -99                 | -99          | -99                            | -99           | -99                                | -99                     | -99                                | -99                                        | -99          | -99                                                   | -99                                                   | -99                     | -99                                                         | -99                                           | -99                                      | -99                                              | -99                                     | 5             | -99                             | -99                    | -99        |  |  |  |  |                        |
| 0,26261114                                                | 0,14141431                    | 0,92466328          | 0,01042362   | 0,09106244                     | 2,23302592    | 0,05908763                         | 0,05904669              | 0,02812506                         | 0,03855335                                 | 0,00247561   | 0,19737347                                            | 4,16986304                                            | 0,57038186              | 0,04575268                                                  | 0,02927880                                    | 0,08161624                               | 0,66434291                                       | 0,61132014                              | 6             | 0,20518540                      | 0,01655029             | 3,93946577 |  |  |  |  |                        |
| -99                                                       | -99                           | -99                 | -99          | -99                            | -99           | -99                                | -99                     | -99                                | -99                                        | -99          | -99                                                   | -99                                                   | -99                     | -99                                                         | -99                                           | -99                                      | -99                                              | -99                                     | 7             | -99                             | -99                    | -99        |  |  |  |  |                        |
| -99                                                       | -99                           | -99                 | -99          | -99                            | -99           | -99                                | -99                     | -99                                | -99                                        | -99          | -99                                                   | -99                                                   | -99                     | -99                                                         | -99                                           | -99                                      | -99                                              | -99                                     | 8             | -99                             | -99                    | -99        |  |  |  |  |                        |
| -99                                                       | -99                           | -99                 | -99          | -99                            | -99           | -99                                | -99                     | -99                                | -99                                        | -99          | -99                                                   | -99                                                   | -99                     | -99                                                         | -99                                           | -99                                      | -99                                              | -99                                     | 9             | -99                             | -99                    | -99        |  |  |  |  |                        |
| -99                                                       | -99                           | -99                 | -99          | -99                            | -99           | -99                                | -99                     | -99                                | -99                                        | -99          | -99                                                   | -99                                                   | -99                     | -99                                                         | -99                                           | -99                                      | -99                                              | -99                                     | 10            | -99                             | -99                    | -99        |  |  |  |  |                        |
| -99                                                       | -99                           | -99                 | -99          | -99                            | -99           | -99                                | -99                     | -99                                | -99                                        | -99          | -99                                                   | -99                                                   | -99                     | -99                                                         | -99                                           | -99                                      | -99                                              | -99                                     | 11            | -99                             | -99                    | -99        |  |  |  |  |                        |
| -99                                                       | -99                           | -99                 | -99          | -99                            | -99           | -99                                | -99                     | -99                                | -99                                        | -99          | -99                                                   | -99                                                   | -99                     | -99                                                         | -99                                           | -99                                      | -99                                              | -99                                     | 12            | -99                             | -99                    | -99        |  |  |  |  |                        |
| -99                                                       | -99                           | -99                 | -99          | -99                            | -99           | -99                                | -99                     | -99                                | -99                                        | -99          | -99                                                   | -99                                                   | -99                     | -99                                                         | -99                                           | -99                                      | -99                                              | -99                                     | 13            | -99                             | -99                    | -99        |  |  |  |  |                        |
| -99                                                       | -99                           | -99                 | -99          | -99                            | -99           | -99                                | -99                     | -99                                | -99                                        | -99          | -99                                                   | -99                                                   | -99                     | -99                                                         | -99                                           | -99                                      | -99                                              | -99                                     | 14            | -99                             | -99                    | -99        |  |  |  |  |                        |
| -99                                                       | -99                           | -99                 | -99          | -99                            | -99           | -99                                | -99                     | -99                                | -99                                        | -99          | -99                                                   | -99                                                   | -99                     | -99                                                         | -99                                           | -99                                      | -99                                              | -99                                     | 15            | -99                             | -99                    | -99        |  |  |  |  |                        |
| 0,06782684                                                | 0,25278802                    | 0,57315609          | 0,01061317   | 0,02653426                     | 1,55078641    | 0,02221996                         | 0,22877479              | 0,01797331                         | 0,05695633                                 | 0,00041546   | 0,42750109                                            | 4,55042091                                            | 0,16098520              | 0,21538654                                                  | 0,02270258                                    | 0,13985464                               | 0,74123350                                       | 0,99792272                              | 16            | 0,26535580                      | 0,02791143             | 2,26419780 |  |  |  |  |                        |
| 0,20479466                                                | 0,12109826                    | 0,57285821          | 0,01808892   | 0,04806898                     | 6,35657662    | 0,00212879                         | 0,09802204              | 0,00344627                         | 0,02046426                                 | 0,00183914   | 0,26211104                                            | 3,58568810                                            | 0,16451032              | 0,06625853                                                  | 0,01123583                                    | 0,19947087                               | 0,70821043                                       | 0,67607256                              | 17            | 0,33338244                      | 0,02256530             | 2,00034660 |  |  |  |  |                        |
| 0,10433174                                                | 0,12321502                    | 0,98230980          | 0,04786948   | 0,01433090                     | 3,29493499    | 0,03470410                         | 0,09870384              | 0,02319970                         | 0,00908215                                 | 0,00115351   | 0,23040597                                            | 6,26906375                                            | 0,02256530              | 0,27286325                                                  | 0,01624624                                    | 0,11005145                               | 1,02331478                                       | 0,68836708                              | 18            | 0,30066941                      | 0,00041640             | 3,68138848 |  |  |  |  |                        |
| 0,05431521                                                | 0,11411023                    | 0,66595657          | 0,00427014   | 0,05353032                     | 1,70941182    | 0,00002661                         | 0,11308061              | 0,01298959                         | 0,00461485                                 | 0,00002016   | 0,10788005                                            | 3,36009029                                            | 0,35613595              | 0,26215646                                                  | 0,00397866                                    | 0,28390890                               | 0,19730508                                       | 0,31589128                              | 19            | 0,18498754                      | 0,00033385             | 4,22367843 |  |  |  |  |                        |
| -99                                                       | -99                           | -99                 | -99          | -99                            | -99           | -99                                | -99                     | -99                                | -99                                        | -99          | -99                                                   | -99                                                   | -99                     | -99                                                         | -99                                           | -99                                      | -99                                              | -99                                     | 20            | -99                             | -99                    | -99        |  |  |  |  |                        |
| -99                                                       | -99                           | -99                 | -99          | -99                            | -99           | -99                                | -99                     | -99                                | -99                                        | -99          | -99                                                   | -99                                                   | -99                     | -99                                                         | -99                                           | -99                                      | -99                                              | -99                                     | 21            | -99                             | -99                    | -99        |  |  |  |  |                        |
| -99                                                       | -99                           | -99                 | -99          | -99                            | -99           | -99                                | -99                     | -99                                | -99                                        | -99          | -99                                                   | -99                                                   | -99                     | -99                                                         | -99                                           | -99                                      | -99                                              | -99                                     | 22            | -99                             | -99                    | -99        |  |  |  |  |                        |
| -99                                                       | -99                           | -99                 | -99          | -99                            | -99           | -99                                | -99                     | -99                                | -99                                        | -99          | -99                                                   | -99                                                   | -99                     | -99                                                         | -99                                           | -99                                      | -99                                              | -99                                     | 23            | -99                             | -99                    | -99        |  |  |  |  |                        |
| 0,25818910                                                | 0,12767076                    | 0,38971733          | 0,01667118   | 0,02374060                     | 1,62957980    | 0,01871709                         | 0,08102439              | 0,01675227                         | 0,00401746                                 | 0,00177557   | 0,15288301                                            | 4,55515454                                            | 0,08720170              | 0,06365863                                                  | 0,01750002                                    | 0,10065565                               | 0,62092891                                       | 0,49878846                              | 24            | 0,31111072                      | 0,00241544             | 2,01460919 |  |  |  |  |                        |
| -99                                                       | -99                           | -99                 | -99          | -99                            | -99           | -99                                | -99                     | -99                                | -99                                        | -99          | -99                                                   | -99                                                   | -99                     | -99                                                         | -99                                           | -99                                      | -99                                              | -99                                     | 25            | -99                             | -99                    | -99        |  |  |  |  |                        |
| -99                                                       | -99                           | -99                 | -99          | -99                            | -99           | -99                                | -99                     | -99                                | -99                                        | -99          | -99                                                   | -99                                                   | -99                     | -99                                                         | -99                                           | -99                                      | -99                                              | -99                                     | 26            | -99                             | -99                    | -99        |  |  |  |  |                        |
| -99                                                       | -99                           | -99                 | -99          | -99                            | -99           | -99                                | -99                     | -99                                | -99                                        | -99          | -99                                                   | -99                                                   | -99                     | -99                                                         | -99                                           | -99                                      | -99                                              | -99                                     | 27            | -99                             | -99                    | -99        |  |  |  |  |                        |
| -99                                                       | -99                           | -99                 | -99          | -99                            | -99           | -99                                | -99                     | -99                                | -99                                        | -99          | -99                                                   | -99                                                   | -99                     | -99                                                         | -99                                           | -99                                      | -99                                              | -99                                     | 28            | -99                             | -99                    | -99        |  |  |  |  |                        |
| -99                                                       | -99                           | -99                 | -99          | -99                            | -99           | -99                                | -99                     | -99                                | -99                                        | -99          | -99                                                   | -99                                                   | -99                     | -99                                                         | -99                                           | -99                                      | -99                                              | -99                                     | 29            | -99                             | -99                    | -99        |  |  |  |  |                        |
| -99                                                       | -99                           | -99                 | -99          | -99                            | -99           | -99                                | -99                     | -99                                | -99                                        | -99          | -99                                                   | -99                                                   | -99                     | -99                                                         | -99                                           | -99                                      | -99                                              | -99                                     | 30            | -99                             | -99                    | -99        |  |  |  |  |                        |
| -99                                                       | -99                           | -99                 | -99          | -99                            | -99           | -99                                | -99                     | -99                                | -99                                        | -99          | -99                                                   | -99                                                   | -99                     | -99                                                         | -99                                           | -99                                      | -99                                              | -99                                     | 31            | -99                             | -99                    | -99        |  |  |  |  |                        |
| -99                                                       | -99                           | -99                 | -99          | -99                            | -99           | -99                                | -99                     | -99                                | -99                                        | -99          | -99                                                   | -99                                                   | -99                     | -99                                                         | -99                                           | -99                                      | -99                                              | -99                                     | 32            | -99                             | -99                    | -99        |  |  |  |  |                        |
| 0,09792018                                                | 0,13237935                    | 0,21790180          | 0,00877582   | 0,01606150                     | 2,56996729    | 0,00001546                         | 0,07597929              | 0,01357174                         | 0,00594441                                 | 0,00159277   | 0,12038687                                            | 5,35820582                                            | 0,09478155              | 0,05527420                                                  | 0,00360884                                    | 0,03137480                               | 0,64115719                                       | 1,86315797                              | 33            | 0,20009403                      | 0,00156540             | 3,28695111 |  |  |  |  |                        |
| -99                                                       | -99                           | -99                 | -99          | -99                            | -99           | -99                                | -99                     | -99                                | -99                                        | -99          | -99                                                   | -99                                                   | -99                     | -99                                                         | -99                                           | -99                                      | -99                                              | -99                                     | 34            | -99                             | -99                    | -99        |  |  |  |  |                        |
| 0,26471283                                                | 0,11253924                    | 0,49706279          | 0,01067589   | 0,03119589                     | 1,42059962    | 0,00024832                         | 0,07450598              | 0,01953899                         | 0,02868619                                 | 0,00087314   | 0,18966166                                            | 4,17999148                                            | 0,17843864              | 0,09844761                                                  | 0,01722324                                    | 0,17319870                               | 0,92370239                                       | 0,61195607                              | 35            | 0,26933992                      | 0,01737913             | 2,91500832 |  |  |  |  |                        |
| -99                                                       | -99                           | -99                 | -99          | -99                            | -99           | -99                                | -99                     | -99                                | -99                                        | -99          | -99                                                   | -99                                                   | -99                     | -99                                                         | -99                                           | -99                                      | -99                                              | -99                                     | 36            | -99                             | -99                    | -99        |  |  |  |  |                        |
| -99                                                       | -99                           | -99                 | -99          | -99                            | -99           | -99                                | -99                     | -99                                | -99                                        | -99          | -99                                                   | -99                                                   | -99                     | -99                                                         | -99                                           | -99                                      | -99                                              | -99                                     | 37            | -99                             | -99                    | -99        |  |  |  |  |                        |
| -99                                                       | -99                           | -99                 | -99          | -99                            | -99           | -99                                | -99                     | -99                                | -99                                        | -99          | -99                                                   | -99                                                   | -99                     | -99                                                         | -99                                           | -99                                      | -99                                              | -99                                     | 38            | -99                             | -99                    | -99        |  |  |  |  |                        |
| -99                                                       | -99                           | -99                 | -99          | -99                            | -99           | -99                                | -99                     | -99                                | -99                                        | -99          | -99                                                   | -99                                                   | -99                     | -99                                                         | -99                                           | -99                                      | -99                                              | -99                                     | 39            | -99                             | -99                    | -99        |  |  |  |  |                        |
| 0,28977399                                                | 0,07314952                    | 0,66388258          | 0,01532467   | 0,04010706                     | 2,13465068    | 0,01231022                         | 0,08310044              | 0,01275317                         | 0,00638101                                 | 0,00053469   | 0,17158555                                            | 3,47978941                                            | 0,36729216              | 0,20949678                                                  | 0,03755113                                    | 0,07609788                               | 0,79498525                                       | 0,34340906                              | 40            | 0,25720668                      | 0,00974582             | 0,93692145 |  |  |  |  |                        |
| -99                                                       | -99                           | -99                 | -99          | -99                            | -99           | -99                                | -99                     | -99                                | -99                                        | -99          | -99                                                   | -99                                                   | -99                     | -99                                                         | -99                                           | -99                                      | -99                                              | -99                                     | 41            | -99                             | -99                    | -99        |  |  |  |  |                        |
| -99                                                       | -99                           | -99                 | -99          | -99                            | -99           | -99                                | -99                     | -99                                | -99                                        | -99          | -99                                                   | -99                                                   | -99                     | -99                                                         | -99                                           | -99                                      | -99                                              | -99                                     | 42            | -99                             | -99                    | -99        |  |  |  |  |                        |
| 0,21941742                                                | 0,12454595                    | 1,10860852          | 0,01136507   | 0,04032309                     | 1,56238500    | 0,02546660                         | 0,07203041              | 0,01774738                         | 0,00489237                                 | 0,00331161   | 0,13647892                                            | 4,15471639                                            | 0,42742702              | 0,10207843                                                  | 0,00897887                                    | 0,06491744                               | 0,27182499                                       | 0,51646769                              | 43            | 0,35619767                      | 0,00377777             | 3,06258524 |  |  |  |  |                        |
| -99                                                       | -99                           | -99                 | -99          | -99                            | -99           | -99                                | -99                     | -99                                | -99                                        | -99          | -99                                                   | -99                                                   | -99                     | -99                                                         | -99                                           | -99                                      | -99                                              | -99                                     | 44            | -99                             | -99                    | -99        |  |  |  |  |                        |
| -99                                                       | -99                           | -99                 | -99          | -99                            | -99           | -99                                | -99                     | -99                                | -99                                        | -99          | -99                                                   | -99                                                   | -99                     | -99                                                         | -99                                           | -99                                      | -99                                              | -99                                     | 45            | -99                             | -99                    | -99        |  |  |  |  |                        |
| 0,07926073                                                | 0,07313724                    | 0,78553638          | 0,00607774   | 0,08285600                     | 1,69202396    | 0,00261994                         | 0,10264605              | 0,01357174                         | 0,06628150                                 | 0,00266204   | 0,21004204                                            | 2,89939120                                            | 0,26789694              | 0,08613539                                                  | 0,01349670                                    | 0,13516092                               | 0,75983075                                       | 0,60909957                              | 46            | 0,19747610                      | 0,01180670             | 1,50081900 |  |  |  |  |                        |
| -99                                                       | -99                           | -99                 | -99          | -99                            | -99           | -99                                | -99                     | -99                                | -99                                        | -99          | -99                                                   | -99                                                   | -99                     | -99                                                         | -99                                           | -99                                      | -99                                              | -99                                     | 47            | -99                             | -99                    | -99        |  |  |  |  |                        |
| -99                                                       | -99                           | -99                 | -99          | -99                            | -99           | -99                                | -99                     | -99                                | -99                                        | -99          | -99                                                   | -99                                                   | -99                     | -99                                                         | -99                                           | -99                                      | -99                                              | -99                                     | 48            | -99                             | -99                    | -99        |  |  |  |  |                        |
| 0,13130557                                                | 0,36984688                    | 0,26061644          | 0,02631447   | 0,03377267                     | 2,11403608    | 0,00002061                         | 0,24114955              | 0,01420950                         | 0,00613381                                 | 0,00113822   | 0,28361387                                            | 5,00718583                                            | 0,02849791              | 0,18111777                                                  | 0,03629715                                    | 0,03328463                               | 1,24142749                                       | 1,39958587                              | 49            | 0,24587552                      | 0,00157329             | 3,28069164 |  |  |  |  |                        |
| 0,28628024                                                | 0,16893030                    | 0,78105704          | 0,00429389   | 0,01072038                     | 2,10307456    | 0,00001563                         | 0,05420238              | 0,02365846                         | 0,01187030                                 | 0,00337827   | 0,18874365                                            | 4,81488053                                            | 0,03401936              | 0,21726083                                                  | 0,02323591                                    | 0,19716837                               | 1,41274394                                       | 0,78648982                              | 50            | 0,27710411                      | 0,01770745             | 2,81811773 |  |  |  |  |                        |
| 0,08254073                                                | 0,12641591                    | 0,44265358          | 0,01148783   | 0,02216228                     | 0,59141798    | 0,01413338                         | 0,18521207              | 0,01262345                         | 0,00477015                                 | 0,00016312   | 0,12067929                                            | 4,46992306                                            | 0,01690997              | 0,08236927                                                  | 0,03274118                                    | 0,                                       |                                                  |                                         |               |                                 |                        |            |  |  |  |  |                        |





[illegible]

[illegible]

| JKI Shelter_Ds [68015]                                 |                                  |                                                     |                                     |                                         |                                   |                                                     |                                  |                         |                         |                                                       |                                        |                                                               |                                         |                                                         |             |              |                                        |                           |          |
|--------------------------------------------------------|----------------------------------|-----------------------------------------------------|-------------------------------------|-----------------------------------------|-----------------------------------|-----------------------------------------------------|----------------------------------|-------------------------|-------------------------|-------------------------------------------------------|----------------------------------------|---------------------------------------------------------------|-----------------------------------------|---------------------------------------------------------|-------------|--------------|----------------------------------------|---------------------------|----------|
| 32                                                     | 31                               | 28                                                  | 19                                  | 26                                      | 5                                 | 36                                                  | 20                               | 29                      | 14                      | 30                                                    | 9                                      | 13                                                            | 2                                       | 18                                                      | 16          | 10           | 7                                      | 34                        |          |
| Serine-<br>threonine_pro<br>tein_kinase_<br>plant-type | TMV_<br>resistance_<br>protein_N | Homoserine_<br>dehydrogen<br>ase_family_<br>protein | Cc-nbs-lrr<br>resistance<br>protein | UDP-glucose:<br>glucosyltrans<br>ferase | Methionyl-<br>tRNA_<br>synthetase | 70_kDa_<br>subunit_of_<br>replication_<br>protein_A | Gene_of_<br>unknown_<br>function | RING_finger_<br>protein | Flagellin-<br>sensing 2 | Serine-<br>threonine<br>protein kinase,<br>plant-type | TIR-NBS-<br>LRR_disease_<br>resistance | LRR receptor-<br>like serine/<br>threonine-<br>protein kinase | Poly(ADP-<br>ribose)_glyco<br>hydrolase | Bacterial_spot<br>_disease_<br>resistance_<br>protein_4 | Extensin    | Lipoxygenase | Betaine_<br>aldehyde_<br>dehydrogenase | Fatty_acid_<br>desaturase |          |
| GSC0003                                                | PGSC0003                         | PGSC0003                                            | PGSC0003                            | PGSC0003                                | PGSC0003                          | PGSC0003                                            | PGSC0003                         | PGSC0003                | PGSC0003                | PGSC0003                                              | PGSC0003                               | PGSC0003                                                      | PGSC0003                                | PGSC0003                                                | PGSC0003    | PGSC0003     | PGSC0003                               | PGSC0003                  | PGSC0003 |
| DMT40004644                                            | DMT40004689                      | DMT40004811                                         | DMT40004909                         | DMT40004912                             | DMT40004917                       | DMT40005251                                         | DMT40006237                      | DMT40006687             | DMT40006877             | DMT40006878                                           | DMT40007144                            | DMT40007188                                                   | DMT40007551                             | DMT40008081                                             | DMT40008201 | DMT40008202  | DMT40008302                            | DMT40008385               |          |
| 0,04484217                                             | 0,11454608                       | 0,06796802                                          | 0,10995613                          | 1,61552156                              | 0,12639401                        | 0,60541654                                          | 0,23229017                       | 1,86218964              | 0,02332466              | 0,13231055                                            | 0,31753775                             | 0,09793715                                                    | 0,50208377                              | 0,24502485                                              | 1,13366941  | 2,87778616   | 0,53218509                             | 0,00186838                |          |
| -99                                                    | -99                              | -99                                                 | -99                                 | -99                                     | -99                               | -99                                                 | -99                              | -99                     | -99                     | -99                                                   | -99                                    | -99                                                           | -99                                     | -99                                                     | -99         | -99          | -99                                    | -99                       |          |
| -99                                                    | -99                              | -99                                                 | -99                                 | -99                                     | -99                               | -99                                                 | -99                              | -99                     | -99                     | -99                                                   | -99                                    | -99                                                           | -99                                     | -99                                                     | -99         | -99          | -99                                    | -99                       |          |
| -99                                                    | -99                              | -99                                                 | -99                                 | -99                                     | -99                               | -99                                                 | -99                              | -99                     | -99                     | -99                                                   | -99                                    | -99                                                           | -99                                     | -99                                                     | -99         | -99          | -99                                    | -99                       |          |
| -99                                                    | -99                              | -99                                                 | -99                                 | -99                                     | -99                               | -99                                                 | -99                              | -99                     | -99                     | -99                                                   | -99                                    | -99                                                           | -99                                     | -99                                                     | -99         | -99          | -99                                    | -99                       |          |
| 0,02871603                                             | 0,22988751                       | 0,01147788                                          | 0,11711518                          | 2,67214816                              | 0,25000000                        | 0,80496614                                          | 0,09565605                       | 2,54382601              | 0,08127751              | 0,11383373                                            | 0,23536962                             | 0,04948037                                                    | 0,55133458                              | 0,04478005                                              | 0,68634222  | 4,48155686   | 0,35898613                             | 0,00794355                |          |
| -99                                                    | -99                              | -99                                                 | -99                                 | -99                                     | -99                               | -99                                                 | -99                              | -99                     | -99                     | -99                                                   | -99                                    | -99                                                           | -99                                     | -99                                                     | -99         | -99          | -99                                    | -99                       |          |
| -99                                                    | -99                              | -99                                                 | -99                                 | -99                                     | -99                               | -99                                                 | -99                              | -99                     | -99                     | -99                                                   | -99                                    | -99                                                           | -99                                     | -99                                                     | -99         | -99          | -99                                    | -99                       |          |
| -99                                                    | -99                              | -99                                                 | -99                                 | -99                                     | -99                               | -99                                                 | -99                              | -99                     | -99                     | -99                                                   | -99                                    | -99                                                           | -99                                     | -99                                                     | -99         | -99          | -99                                    | -99                       |          |
| -99                                                    | -99                              | -99                                                 | -99                                 | -99                                     | -99                               | -99                                                 | -99                              | -99                     | -99                     | -99                                                   | -99                                    | -99                                                           | -99                                     | -99                                                     | -99         | -99          | -99                                    | -99                       |          |
| -99                                                    | -99                              | -99                                                 | -99                                 | -99                                     | -99                               | -99                                                 | -99                              | -99                     | -99                     | -99                                                   | -99                                    | -99                                                           | -99                                     | -99                                                     | -99         | -99          | -99                                    | -99                       |          |
| -99                                                    | -99                              | -99                                                 | -99                                 | -99                                     | -99                               | -99                                                 | -99                              | -99                     | -99                     | -99                                                   | -99                                    | -99                                                           | -99                                     | -99                                                     | -99         | -99          | -99                                    | -99                       |          |
| -99                                                    | -99                              | -99                                                 | -99                                 | -99                                     | -99                               | -99                                                 | -99                              | -99                     | -99                     | -99                                                   | -99                                    | -99                                                           | -99                                     | -99                                                     | -99         | -99          | -99                                    | -99                       |          |
| -99                                                    | -99                              | -99                                                 | -99                                 | -99                                     | -99                               | -99                                                 | -99                              | -99                     | -99                     | -99                                                   | -99                                    | -99                                                           | -99                                     | -99                                                     | -99         | -99          | -99                                    | -99                       |          |
| -99                                                    | -99                              | -99                                                 | -99                                 | -99                                     | -99                               | -99                                                 | -99                              | -99                     | -99                     | -99                                                   | -99                                    | -99                                                           | -99                                     | -99                                                     | -99         | -99          | -99                                    | -99                       |          |
| -99                                                    | -99                              | -99                                                 | -99                                 | -99                                     | -99                               | -99                                                 | -99                              | -99                     | -99                     | -99                                                   | -99                                    | -99                                                           | -99                                     | -99                                                     | -99         | -99          | -99                                    | -99                       |          |
| 0,02189887                                             | 0,22221067                       | 0,02701679                                          | 0,27018135                          | 3,13398875                              | 0,16009498                        | 0,04100660                                          | 0,08573333                       | 2,05480288              | 0,10555011              | 0,15854892                                            | 0,37500975                             | 0,05823378                                                    | 0,47302882                              | 0,14701141                                              | 0,67501899  | 1,27987241   | 0,34796160                             | 0,00329844                |          |
| 0,04196266                                             | 0,28229001                       | 0,10491188                                          | 0,09120457                          | 3,14977767                              | 0,28722436                        | 0,01337099                                          | 0,58045253                       | 2,58336232              | 0,17233050              | 0,27840364                                            | 0,50671625                             | 0,11143312                                                    | 0,52422207                              | 0,05922089                                              | 0,48506500  | 1,98377719   | 0,59511897                             | 0,00003912                |          |
| 0,04763778                                             | 0,15054326                       | 0,05614300                                          | 0,22739146                          | 2,57442457                              | 0,21542387                        | 0,02092324                                          | 0,01813914                       | 3,50703055              | 0,09481440              | 0,09640488                                            | 0,17364948                             | 0,09273450                                                    | 0,52531329                              | 0,05625987                                              | 0,30719997  | 1,87416763   | 0,47838697                             | 0,00004245                |          |
| 0,04702266                                             | 0,17905814                       | 0,01819266                                          | 0,10202233                          | 2,69540115                              | 0,19045209                        | 0,88853469                                          | 0,02652506                       | 2,65093262              | 0,29596531              | 0,33459783                                            | 0,22398903                             | 0,07853611                                                    | 0,29658139                              | 0,03126083                                              | 0,68278345  | 1,49019384   | 0,46281258                             | 0,00318057                |          |
| -99                                                    | -99                              | -99                                                 | -99                                 | -99                                     | -99                               | -99                                                 | -99                              | -99                     | -99                     | -99                                                   | -99                                    | -99                                                           | -99                                     | -99                                                     | -99         | -99          | -99                                    | -99                       |          |
| -99                                                    | -99                              | -99                                                 | -99                                 | -99                                     | -99                               | -99                                                 | -99                              | -99                     | -99                     | -99                                                   | -99                                    | -99                                                           | -99                                     | -99                                                     | -99         | -99          | -99                                    | -99                       |          |
| -99                                                    | -99                              | -99                                                 | -99                                 | -99                                     | -99                               | -99                                                 | -99                              | -99                     | -99                     | -99                                                   | -99                                    | -99                                                           | -99                                     | -99                                                     | -99         | -99          | -99                                    | -99                       |          |
| -99                                                    | -99                              | -99                                                 | -99                                 | -99                                     | -99                               | -99                                                 | -99                              | -99                     | -99                     | -99                                                   | -99                                    | -99                                                           | -99                                     | -99                                                     | -99         | -99          | -99                                    | -99                       |          |
| -99                                                    | -99                              | -99                                                 | -99                                 | -99                                     | -99                               | -99                                                 | -99                              | -99                     | -99                     | -99                                                   | -99                                    | -99                                                           | -99                                     | -99                                                     | -99         | -99          | -99                                    | -99                       |          |
| 0,03956860                                             | 0,27442808                       | 0,06627001                                          | 0,05541806                          | 2,20152008                              | 0,16963432                        | 0,69858133                                          | 0,20187022                       | 2,41747337              | 0,12539050              | 0,15620364                                            | 0,16092942                             | 0,09122638                                                    | 0,31392678                              | 0,06860702                                              | 1,61608155  | 1,92318827   | 0,51637820                             | 0,00323168                |          |
| -99                                                    | -99                              | -99                                                 | -99                                 | -99                                     | -99                               | -99                                                 | -99                              | -99                     | -99                     | -99                                                   | -99                                    | -99                                                           | -99                                     | -99                                                     | -99         | -99          | -99                                    | -99                       |          |
| -99                                                    | -99                              | -99                                                 | -99                                 | -99                                     | -99                               | -99                                                 | -99                              | -99                     | -99                     | -99                                                   | -99                                    | -99                                                           | -99                                     | -99                                                     | -99         | -99          | -99                                    | -99                       |          |
| -99                                                    | -99                              | -99                                                 | -99                                 | -99                                     | -99                               | -99                                                 | -99                              | -99                     | -99                     | -99                                                   | -99                                    | -99                                                           | -99                                     | -99                                                     | -99         | -99          | -99                                    | -99                       |          |
| -99                                                    | -99                              | -99                                                 | -99                                 | -99                                     | -99                               | -99                                                 | -99                              | -99                     | -99                     | -99                                                   | -99                                    | -99                                                           | -99                                     | -99                                                     | -99         | -99          | -99                                    | -99                       |          |
| -99                                                    | -99                              | -99                                                 | -99                                 | -99                                     | -99                               | -99                                                 | -99                              | -99                     | -99                     | -99                                                   | -99                                    | -99                                                           | -99                                     | -99                                                     | -99         | -99          | -99                                    | -99                       |          |
| -99                                                    | -99                              | -99                                                 | -99                                 | -99                                     | -99                               | -99                                                 | -99                              | -99                     | -99                     | -99                                                   | -99                                    | -99                                                           | -99                                     | -99                                                     | -99         | -99          | -99                                    | -99                       |          |
| -99                                                    | -99                              | -99                                                 | -99                                 | -99                                     | -99                               | -99                                                 | -99                              | -99                     | -99                     | -99                                                   | -99                                    | -99                                                           | -99                                     | -99                                                     | -99         | -99          | -99                                    | -99                       |          |
| -99                                                    | -99                              | -99                                                 | -99                                 | -99                                     | -99                               | -99                                                 | -99                              | -99                     | -99                     | -99                                                   | -99                                    | -99                                                           | -99                                     | -99                                                     | -99         | -99          | -99                                    | -99                       |          |
| 0,04815235                                             | 0,14945157                       | 0,03358009                                          | 0,14012148                          | 1,12876879                              | 0,10737649                        | 0,57624331                                          | 0,03490917                       | 2,16107629              | 0,11201393              | 0,15558232                                            | 0,13896081                             | 0,01430586                                                    | 0,31748273                              | 0,07904127                                              | 0,22294349  | 0,64115719   | 0,28199666                             | 0,00190466                |          |
| -99                                                    | -99                              | -99                                                 | -99                                 | -99                                     | -99                               | -99                                                 | -99                              | -99                     | -99                     | -99                                                   | -99                                    | -99                                                           | -99                                     | -99                                                     | -99         | -99          | -99                                    | -99                       |          |
| 0,03816780                                             | 0,29719876                       | 0,07019441                                          | 0,20826611                          | 2,32865998                              | 0,26952668                        | 0,45612464                                          | 0,07297267                       | 2,53942172              | 0,09191856              | 0,09940760                                            | 0,32567390                             | 0,03684212                                                    | 0,31786807                              | 0,11748105                                              | 0,51423510  | 1,16756268   | 0,32703116                             | 0,00001211                |          |
| -99                                                    | -99                              | -99                                                 | -99                                 | -99                                     | -99                               | -99                                                 | -99                              | -99                     | -99                     | -99                                                   | -99                                    | -99                                                           | -99                                     | -99                                                     | -99         | -99          | -99                                    | -99                       |          |
| -99                                                    | -99                              | -99                                                 | -99                                 | -99                                     | -99                               | -99                                                 | -99                              | -99                     | -99                     | -99                                                   | -99                                    | -99                                                           | -99                                     | -99                                                     | -99         | -99          | -99                                    | -99                       |          |
| -99                                                    | -99                              | -99                                                 | -99                                 | -99                                     | -99                               | -99                                                 | -99                              | -99                     | -99                     | -99                                                   | -99                                    | -99                                                           | -99                                     | -99                                                     | -99         | -99          | -99                                    | -99                       |          |
| -99                                                    | -99                              | -99                                                 | -99                                 | -99                                     | -99                               | -99                                                 | -99                              | -99                     | -99                     | -99                                                   | -99                                    | -99                                                           | -99                                     | -99                                                     | -99         | -99          | -99                                    | -99                       |          |
| 0,04893464                                             | 0,20320390                       | 0,05719370                                          | 0,10576982                          | 2,93020175                              | 0,10547697                        | 0,12430877                                          | 0,07259430                       | 2,77213977              | 0,08925025              | 0,10445837                                            | 0,18985896                             | 0,03823400                                                    | 0,59666787                              | 0,14640127                                              | 0,33891608  | 1,06363267   | 0,28048587                             | 0,00305418                |          |
| -99                                                    | -99                              | -99                                                 | -99                                 | -99                                     | -99                               | -99                                                 | -99                              | -99                     | -99                     | -99                                                   | -99                                    | -99                                                           | -99                                     | -99                                                     | -99         | -99          | -99                                    | -99                       |          |
| -99                                                    | -99                              | -99                                                 | -99                                 | -99                                     | -99                               | -99                                                 | -99                              | -99                     | -99                     | -99                                                   | -99                                    | -99                                                           | -99                                     | -99                                                     | -99         | -99          | -99                                    | -99                       |          |
| -99                                                    | -99                              | -99                                                 | -99                                 | -99                                     | -99                               | -99                                                 | -99                              | -99                     | -99                     | -99                                                   | -99                                    | -99                                                           | -99                                     | -99                                                     | -99         | -99          | -99                                    | -99                       |          |
| 0,04391172                                             | 0,25186979                       | 0,07113730                                          | 0,07730738                          | 2,04167043                              | 0,26752581                        | 0,38789820                                          | 0,08542191                       | 2,27323999              | 0,30987322              | 0,37912618                                            | 0,28932241                             | 0,09771677                                                    | 0,46675908                              | 0,15775416                                              | 0,36041976  | 2,47555156   | 0,36901465                             | 0,00486195                |          |
| -99                                                    | -99                              | -99                                                 | -99                                 | -99                                     | -99                               | -99                                                 | -99                              | -99                     | -99                     | -99                                                   | -99                                    | -99                                                           | -99                                     | -99                                                     | -99         | -99          | -99                                    | -99                       |          |
| -99                                                    | -99                              | -99                                                 | -99                                 | -99                                     | -99                               | -99                                                 | -99                              | -99                     | -99                     | -99                                                   | -99                                    | -99                                                           | -99                                     | -99                                                     | -99         | -99          | -99                                    | -99                       |          |
| -99                                                    | -99                              | -99                                                 | -99                                 | -99                                     | -99                               | -99                                                 | -99                              | -99                     | -99                     | -99                                                   | -99                                    | -99                                                           | -99                                     | -99                                                     | -99         | -99          | -99                                    | -99                       |          |
| 0,03785821                                             | 0,16028930                       | 0,04218138                                          | 0,08199899                          | 2,46527741                              | 0,16721197                        | 0,82573456                                          | 0,01081180                       | 2,81229902              | 0,02454801              | 0,03488498                                            | 0,26057128                             | 0,03113649                                                    | 0,38978487                              | 0,16286517                                              | 2,88136015  | 5,82294907   | 0,39195230                             | 0,00479834                |          |
| -99                                                    | -99                              | -99                                                 | -99                                 | -99                                     | -99                               | -99                                                 | -99                              | -99                     | -99                     | -99                                                   | -99                                    | -99                                                           | -99                                     | -99                                                     | -99         | -99          | -99                                    | -99                       |          |
| -99                                                    | -99                              | -99                                                 | -99                                 | -99                                     | -99                               | -99                                                 | -99                              | -99                     | -99                     | -99                                                   | -99                                    | -99                                                           | -99                                     | -99                                                     | -99         | -99          | -99                                    | -99                       |          |
| -99                                                    | -99                              | -99                                                 | -99                                 | -99                                     | -99                               | -99                                                 | -99                              | -99                     | -99                     | -99                                                   | -99                                    | -99                                                           | -99                                     | -99                                                     | -99         | -99          | -99                                    | -99                       |          |
| 0,04005150                                             | 0,13946742                       | 0,02231256                                          | 0,05987095                          | 1,97794183                              | 0,22484458                        | 1,13288389                                          | 0,40248307                       | 1,99446250              | 0,05094202              | 0,04349520                                            | 0,40053494                             | 0,04866404                                                    | 0,45501941                              | 0,02335702                                              | 0,18288390  | 0,26134003   | 0,21212698                             | 0,00186320                |          |
| 0,04390412                                             | 0,17464533                       | 0,03449426                                          | 0,10691232                          | 2,53414662                              | 0,20383872                        | 0,08063221                                          | 0,09040209                       | 2,56063212              | 0,03397224              | 0,03218428                                            | 0,16431089                             | 0,06423485                                                    | 0,44797807                              | 0,16294986                                              | 0,24291105  | 0,26785052   | 0,44922185                             | 0,00225212                |          |
| 0,03615277                                             | 0,24455824                       | 0,02433624                                          | 0,06195008                          | 2,50055788                              | 0,06489495                        | 0,54233268                                          | 0,03683574                       | 2,43555405              | 0,03691242              | 0,03080375                                            | 0,40507192                             | 0,07301061                                                    | 0,52204642                              | 0,06493995                                              | 0,18805805  | 0,39646076   | 0,18152624                             | 0,00002213                |          |
| -99                                                    | -99                              | -99                                                 | -99                                 | -99                                     | -99                               | -99                                                 | -99                              | -99                     | -99                     | -99                                                   | -99                                    | -99                                                           | -99                                     | -99                                                     | -99         | -99          | -99                                    | -99                       |          |
| -99                                                    | -99                              | -99                                                 | -99                                 | -99                                     | -99                               | -99                                                 | -99                              | -99                     | -99                     | -99                                                   | -99                                    | -99                                                           | -99                                     | -99                                                     | -99         | -99          | -99                                    | -99                       |          |
| -99                                                    | -99                              | -99                                                 | -99                                 | -99                                     | -99                               | -99                                                 | -99                              | -99                     | -99                     | -99                                                   | -99                                    | -99                                                           | -99                                     | -99                                                     | -99         | -99          | -99                                    | -99                       |          |
| -99                                                    | -99                              | -99                                                 | -99                                 | -99                                     | -99                               | -99                                                 | -99                              | -99                     | -99                     | -99                                                   | -99                                    | -99                                                           | -99                                     | -99                                                     | -99         | -99          | -99                                    | -99                       |          |
| -99                                                    | -99                              | -99                                                 | -99                                 | -99                                     | -99                               | -99                                                 | -99                              | -99                     | -99                     | -99                                                   | -99                                    | -99                                                           | -99                                     | -99                                                     | -99         | -99          | -99                                    | -99                       |          |
| 0,06783859                                             | 0,14341323                       | 0,03874758                                          | 0,06203602                          | 1,88197831                              | 0,15596022                        | 0,09925269                                          | 0,23104568                       | 1,81158186              | 0,10368291              | 0,09822608                                            | 0,23836594                             | 0,04420183                                                    | 0,37507474                              | 0,04585586                                              | 3,42772175  | 7,97370372   | 0,36710127                             | 0,                        |          |



[illegible]

|            |            |            |            |            |            |            |            |            |            |            |            |            |            |            |            |            |            |            |
|------------|------------|------------|------------|------------|------------|------------|------------|------------|------------|------------|------------|------------|------------|------------|------------|------------|------------|------------|
| -99        | -99        | -99        | -99        | -99        | -99        | -99        | -99        | -99        | -99        | -99        | -99        | -99        | -99        | -99        | -99        | -99        | -99        | -99        |
| -99        | -99        | -99        | -99        | -99        | -99        | -99        | -99        | -99        | -99        | -99        | -99        | -99        | -99        | -99        | -99        | -99        | -99        | -99        |
| -99        | -99        | -99        | -99        | -99        | -99        | -99        | -99        | -99        | -99        | -99        | -99        | -99        | -99        | -99        | -99        | -99        | -99        | -99        |
| -99        | -99        | -99        | -99        | -99        | -99        | -99        | -99        | -99        | -99        | -99        | -99        | -99        | -99        | -99        | -99        | -99        | -99        | -99        |
| -99        | -99        | -99        | -99        | -99        | -99        | -99        | -99        | -99        | -99        | -99        | -99        | -99        | -99        | -99        | -99        | -99        | -99        | -99        |
| 0,03437492 | 0,17647663 | 0,03653695 | 0,23060569 | 0,83422011 | 0,15871386 | 0,12003275 | 0,01404792 | 2,47855625 | 0,08113679 | 0,09002690 | 0,44211697 | 0,16340228 | 0,47417779 | 0,11395215 | 0,25747424 | 0,97704709 | 0,49603025 | 0,00572503 |
| 0,03989910 | 0,23659640 | 0,04491995 | 0,07902758 | 3,06205458 | 0,29270109 | 0,04888379 | 0,15256543 | 2,53239070 | 0,06339443 | 0,09090478 | 0,17659299 | 0,02196728 | 0,36462869 | 0,03302037 | 0,25287565 | 0,72673435 | 0,45234643 | 0,00245085 |
| -99        | -99        | -99        | -99        | -99        | -99        | -99        | -99        | -99        | -99        | -99        | -99        | -99        | -99        | -99        | -99        | -99        | -99        | -99        |
| 0,07860419 | 0,34669766 | 0,06895266 | 0,00001243 | 1,94227839 | 0,17896508 | 1,10784036 | 0,07168177 | 1,75290766 | 0,03124459 | 0,05928250 | 0,44557803 | 0,12283129 | 0,56752270 | 0,03783198 | 0,23927640 | 0,64785821 | 0,46514422 | 0,00337885 |
| -99        | -99        | -99        | -99        | -99        | -99        | -99        | -99        | -99        | -99        | -99        | -99        | -99        | -99        | -99        | -99        | -99        | -99        | -99        |
| 0,07953590 | 0,35496532 | 0,05569725 | 0,08691506 | 1,89047661 | 0,27523770 | 0,70649439 | 0,29458380 | 1,43768738 | 0,08583739 | 0,07975673 | 0,36167104 | 0,24430410 | 0,75092983 | 0,23549201 | 0,48894700 | 0,60405424 | 0,61036748 | 0,00002541 |
| 0,04345000 | 0,22869552 | 0,05345616 | 0,11191691 | 1,85639022 | 0,38196173 | 0,04605495 | 0,13903307 | 2,10016110 | 0,02051041 | 0,03915933 | 0,46409755 | 0,10044656 | 0,48447697 | 0,06590355 | 0,25729583 | 1,51834538 | 0,72976304 | 0,00451049 |
| -99        | -99        | -99        | -99        | -99        | -99        | -99        | -99        | -99        | -99        | -99        | -99        | -99        | -99        | -99        | -99        | -99        | -99        | -99        |
| 0,03614024 | 0,21415837 | 0,01620688 | 0,12822505 | 3,07748111 | 0,15143284 | 0,90862065 | 0,04798575 | 2,93172544 | 0,02831578 | 0,02104688 | 0,47294686 | 0,04071629 | 0,48422518 | 0,07258172 | 0,72635665 | 1,61524163 | 0,40046554 | 0,00002740 |
| -99        | -99        | -99        | -99        | -99        | -99        | -99        | -99        | -99        | -99        | -99        | -99        | -99        | -99        | -99        | -99        | -99        | -99        | -99        |
| -99        | -99        | -99        | -99        | -99        | -99        | -99        | -99        | -99        | -99        | -99        | -99        | -99        | -99        | -99        | -99        | -99        | -99        | -99        |
| -99        | -99        | -99        | -99        | -99        | -99        | -99        | -99        | -99        | -99        | -99        | -99        | -99        | -99        | -99        | -99        | -99        | -99        | -99        |
| -99        | -99        | -99        | -99        | -99        | -99        | -99        | -99        | -99        | -99        | -99        | -99        | -99        | -99        | -99        | -99        | -99        | -99        | -99        |
| 0,02340970 | 0,20621912 | 0,02465886 | 0,14242260 | 2,07376153 | 0,14222530 | 0,86289086 | 0,13105552 | 3,45395671 | 0,19294345 | 0,22944973 | 0,18740742 | 0,10084769 | 0,63960362 | 0,04843689 | 0,19028714 | 0,56850699 | 0,45541383 | 0,00643096 |
| -99        | -99        | -99        | -99        | -99        | -99        | -99        | -99        | -99        | -99        | -99        | -99        | -99        | -99        | -99        | -99        | -99        | -99        | -99        |
| -99        | -99        | -99        | -99        | -99        | -99        | -99        | -99        | -99        | -99        | -99        | -99        | -99        | -99        | -99        | -99        | -99        | -99        | -99        |
| 0,05496854 | 0,26093276 | 0,03157114 | 0,11209159 | 1,85285502 | 0,16825835 | 0,49132515 | 0,10307383 | 1,53023158 | 0,01737010 | 0,02332062 | 0,28494394 | 0,08075806 | 0,54705205 | 0,14416072 | 3,30293825 | 6,24088229 | 0,39358578 | 0,00197730 |
| -99        | -99        | -99        | -99        | -99        | -99        | -99        | -99        | -99        | -99        | -99        | -99        | -99        | -99        | -99        | -99        | -99        | -99        | -99        |
| 0,04007232 | 0,22873515 | 0,04950610 | 0,07431257 | 2,64221891 | 0,20815787 | 0,57784321 | 0,11532283 | 3,04987476 | 0,01780900 | 0,02492522 | 0,15386639 | 0,01904756 | 0,55123905 | 0,04590356 | 1,02722342 | 2,19124379 | 0,37416590 | 0,00512139 |
| 0,05604580 | 0,26202021 | 0,06309852 | 0,14316493 | 1,90362592 | 0,21744915 | 0,71387827 | 0,06336149 | 2,01216693 | 0,02727551 | 0,06137309 | 0,49680445 | 0,14759850 | 0,70307476 | 0,03085718 | 1,19644162 | 0,92899968 | 0,70210076 | 0,00233680 |
| -99        | -99        | -99        | -99        | -99        | -99        | -99        | -99        | -99        | -99        | -99        | -99        | -99        | -99        | -99        | -99        | -99        | -99        | -99        |
| 0,05841570 | 0,19111329 | 0,03341176 | 0,17140725 | 1,82197100 | 0,18118055 | 0,03959604 | 0,04402601 | 2,41747337 | 0,08091214 | 0,07171904 | 0,49465686 | 0,14215138 | 0,44426734 | 0,14304094 | 0,65861168 | 1,07885427 | 0,42943152 | 0,00510278 |
| 0,04442452 | 0,19867744 | 0,03267883 | 0,13411105 | 0,97772456 | 0,16442482 | 1,02207425 | 0,07633561 | 1,53954069 | 0,12145552 | 0,20061481 | 0,37254846 | 0,06889294 | 0,38064024 | 0,02483468 | 0,20327434 | 0,75812098 | 0,32680456 | 0,00314113 |

**Table S6 Transcripts derived from a set of marker candidates for drought tolerance [14] and respective eQTL overlapping with DRYM QTL.**

| Gene product <sup>1</sup>                           | Transcript ID        | LG1 <sup>2</sup> |          | LG2 |          | LG3      |    | LG4 |     | LG5 |    | LG6      |    | LG7      |          | LG8 |          | LG9 |    | LG10 |     | LG11 |          | LG12     |          | Number of overlaps |
|-----------------------------------------------------|----------------------|------------------|----------|-----|----------|----------|----|-----|-----|-----|----|----------|----|----------|----------|-----|----------|-----|----|------|-----|------|----------|----------|----------|--------------------|
|                                                     |                      | 1A               | 1R       | 2A  | 2R       | 3A       | 3R | 4A  | 4R  | 5A  | 5R | 6A       | 6R | 7A       | 7R       | 8A  | 8R       | 9A  | 9R | 10A  | 10R | 11A  | 11R      | 12A      | 12R      |                    |
| Ethylene-inducing xylanase                          | PGSC0003DMT400020366 |                  |          |     |          | 1Ds, 1Co |    | 1Co |     |     |    |          |    |          |          |     |          |     |    |      |     |      |          | 2Ds, 2Co | 2Ds, 1Co | 10                 |
| Bacterial spot disease resistance protein 4         | PGSC0003DMT400080813 |                  |          |     |          |          |    |     |     |     |    |          |    | 1Ds, 1Co |          |     |          |     |    |      |     |      | 2Ds      | 2Co      |          | 6                  |
| Cytochrome P450                                     | PGSC0003DMT400008547 |                  | 1Ds      |     |          |          |    | 1Ds | 1Co |     |    | 1Co      |    | 1Co      |          |     |          |     |    |      |     |      |          |          |          | 5                  |
| Desacetoxymyristic acid 4-hydroxylase               | PGSC0003DMT400041989 |                  |          |     |          |          |    |     |     |     |    | 2Ds, 1Co |    |          |          |     |          |     |    |      |     |      | 1Ds, 1Co |          |          | 5                  |
| Reticuline oxidase                                  | PGSC0003DMT400046308 |                  |          |     | 1Ds, 1Co | 1Ds, 1Co |    |     |     |     |    | 1Co      |    |          |          |     |          |     |    |      |     |      |          |          |          | 5                  |
| UDP-glucose:glucosyltransferase                     | PGSC0003DMT400049125 |                  | 1Ds      |     |          |          |    |     |     |     |    |          |    |          |          |     |          |     |    |      |     |      | 2Ds, 1Co | 1Ds      |          | 5                  |
| O-methyltransferase                                 | PGSC0003DMT400031370 |                  |          |     |          | 1Ds, 2Co |    |     |     |     |    |          |    |          |          |     | 1Ds, 1Co |     |    |      |     |      |          |          |          | 5                  |
| Acidic class II 1,3-beta-glucanase                  | PGSC0003DMT400027201 |                  | 1Ds, 1Co |     |          |          |    |     |     |     |    | 1Ds      |    | 1Ds      |          |     |          |     |    |      |     |      |          | 1Ds      |          | 5                  |
| Beta-D-glucan exohydrolase                          | PGSC0003DMT400015224 |                  |          |     |          |          |    |     |     |     |    | 1Ds, 2Co |    |          |          |     | 1Ds      |     |    |      |     |      |          |          |          | 4                  |
| Cc-nbs-lrr resistance protein                       | PGSC0003DMT400049097 |                  |          |     |          |          |    |     |     |     |    | 2Ds      |    |          |          |     | 1Co      |     |    |      |     |      |          |          | 1Co      | 4                  |
| Lipoxygenase                                        | PGSC0003DMT400082023 | 1Co              |          |     | 1Co      |          |    |     |     |     |    | 1Ds, 1Co |    |          |          |     |          |     |    |      |     |      |          |          |          | 4                  |
| (S)-norococlaurine synthase                         | PGSC0003DMT400008278 |                  |          |     |          |          |    |     | 1Co |     |    |          |    |          | 1Ds, 1Co | 1Co |          |     |    |      |     |      |          |          |          | 4                  |
| Kinase                                              | PGSC0003DMT400042362 | 1Ds, 1Co         | 1Co      |     | 1Co      |          |    |     |     |     |    |          |    |          |          |     |          |     |    |      |     |      |          |          |          | 4                  |
| NADPH-dependent codeinone reductase                 | PGSC0003DMT400037483 |                  |          |     |          |          |    |     |     |     |    |          |    |          |          |     |          |     |    |      |     |      |          | 2Ds, 2Co |          | 4                  |
| Poly(ADP-ribose) glycohydrolase                     | PGSC0003DMT400075512 | 1Co              |          |     |          | 1Co      |    | 1Ds |     |     |    |          |    |          |          |     | 1Co      |     |    |      |     |      |          |          |          | 4                  |
| TIR-NBS-LRR disease resistance                      | PGSC0003DMT400071445 |                  |          |     |          |          |    |     |     |     |    |          |    |          |          |     |          |     |    |      |     |      | 2Ds, 2Co |          |          | 4                  |
| Glutathione s-transferase                           | PGSC0003DMT400004539 |                  | 2Ds, 1Co |     |          |          |    |     |     |     |    |          |    |          |          |     |          |     |    |      |     |      |          |          |          | 3                  |
| PR1 protein                                         | PGSC0003DMT400013094 |                  | 1Ds      |     |          |          |    | 1Ds |     |     |    |          |    |          | 1Ds      |     |          |     |    |      |     |      |          |          |          | 3                  |
| BED finger-nbs-lrr resistance protein               | PGSC0003DMT400035714 |                  |          |     |          |          |    |     | 1Ds |     |    |          |    |          |          |     |          |     |    |      |     |      |          |          | 1Ds, 1Co | 3                  |
| Betaine aldehyde dehydrogenase                      | PGSC0003DMT400083025 |                  |          |     |          |          |    |     |     |     |    | 2Ds, 1Co |    |          |          |     |          |     |    |      |     |      |          |          |          | 3                  |
| Glucosyltransferase                                 | PGSC0003DMT400021019 |                  | 1Ds      |     |          |          |    | 1Co |     |     |    |          |    |          |          |     |          |     |    |      |     |      |          | 1Co      |          | 3                  |
| LRR receptor-like serine/threonine-protein kinase   | PGSC0003DMT400071885 |                  |          |     |          |          |    | 1Ds | 1Ds |     |    |          |    |          |          |     |          |     |    |      |     |      |          | 1Co      |          | 3                  |
| Receptor protein kinase                             | PGSC0003DMT400045689 |                  |          |     | 1Co      |          |    |     |     |     |    |          |    |          |          |     | 1Ds, 1Co |     |    |      |     |      |          |          |          | 3                  |
| S-locus-specific glycoprotein S6                    | PGSC0003DMT400036026 |                  |          |     | 1Ds, 2Co |          |    |     |     |     |    |          |    |          |          |     |          |     |    |      |     |      |          |          |          | 3                  |
| SBT4B protein                                       | PGSC0003DMT400017633 | 1Co              | 1Ds, 1Co |     |          |          |    |     |     |     |    |          |    |          |          |     |          |     |    |      |     |      |          |          |          | 3                  |
| Fatty acid desaturase                               | PGSC0003DMT400083859 |                  |          |     |          |          |    |     |     |     |    |          |    |          |          |     |          |     |    |      | 1Ds |      | 1Co      |          |          | 2                  |
| Glutaryl-tRNA(Gln) amidotransferase subunit A       | PGSC0003DMT400008092 |                  |          |     |          |          |    |     |     |     |    |          |    |          |          |     | 1Co      |     |    |      |     |      | 1Ds      |          |          | 2                  |
| Extensin                                            | PGSC0003DMT400082012 |                  | 1Ds, 1Co |     |          |          |    |     |     |     |    |          |    |          |          |     |          |     |    |      |     |      |          |          |          | 2                  |
| Gamma aminobutyrate transaminase isoform1           | PGSC0003DMT400030682 |                  |          |     | 1Co      |          |    |     |     |     |    |          |    |          | 1Ds      |     |          |     |    |      |     |      |          |          |          | 2                  |
| Hcr9-OR2A                                           | PGSC0003DMT400027792 |                  |          |     | 1Co      |          |    |     | 1Co |     |    |          |    |          |          |     |          |     |    |      |     |      |          |          |          | 2                  |
| Homoserine dehydrogenase family protein             | PGSC0003DMT400048114 |                  |          |     |          |          |    |     |     |     |    | 1Ds      |    |          |          |     |          |     |    |      |     |      | 1Co      |          |          | 2                  |
| TMV resistance protein N                            | PGSC0003DMT400046899 |                  | 1Co      |     |          |          |    |     |     |     |    |          |    |          |          |     |          |     |    |      |     |      |          | 1Ds      |          | 2                  |
| Gene of unknown function                            | PGSC0003DMT400062379 |                  |          |     | 1Co      |          |    |     |     |     |    |          |    |          |          |     |          |     |    |      |     |      |          |          |          | 1                  |
| Multidrug resistance protein ABC transporter family | PGSC0003DMT400031714 |                  |          |     | 1Co      |          |    |     |     |     |    |          |    |          |          |     |          |     |    |      |     |      |          |          |          | 1                  |
| Serine-threonine protein kinase, plant-type         | PGSC0003DMT400068787 |                  |          |     | 1Co      |          |    |     |     |     |    |          |    |          |          |     |          |     |    |      |     |      |          |          |          | 1                  |
| RING finger protein                                 | PGSC0003DMT400066873 | 1Co              |          |     |          |          |    |     |     |     |    |          |    |          |          |     |          |     |    |      |     |      |          |          |          | 1                  |
| Methionyl-tRNA synthetase                           | PGSC0003DMT400049172 |                  |          |     |          |          |    |     |     |     |    |          |    |          | 1Co      |     |          |     |    |      |     |      |          |          |          | 1                  |
| Nbs-lrr resistance protein                          | PGSC0003DMT400021608 |                  |          |     | 1Co      |          |    |     |     |     |    |          |    |          |          |     |          |     |    |      |     |      |          |          |          | 1                  |
| 70 kDa subunit of replication protein A             | PGSC0003DMT400052517 |                  |          |     |          |          |    |     |     |     |    | 1Co      |    |          |          |     |          |     |    |      |     |      |          |          |          | 1                  |
| Serine-threonine protein kinase plant-type          | PGSC0003DMT400046445 |                  |          |     |          |          |    |     |     |     |    | 1Ds      |    |          |          |     |          |     |    |      |     |      |          |          |          | 1                  |
| Flagellin-sensing 2                                 | PGSC0003DMT400068776 |                  |          |     |          |          |    |     |     |     |    |          |    |          |          |     |          |     |    |      |     |      |          |          |          | 0                  |
| Bacterial spot disease resistance protein 4         | PGSC0003DMT400006231 |                  |          |     |          |          |    |     |     |     |    |          |    |          |          |     |          |     |    |      |     |      |          |          |          | 0                  |
| Serine-threonine protein kinase, plant-type         | PGSC0003DMT400028434 |                  |          |     |          |          |    |     |     |     |    |          |    |          |          |     |          |     |    |      |     |      |          |          |          | 0                  |

<sup>1</sup>Gene products are sorted according to the number of eQTL overlapping with DRYM QTL in descending order.

<sup>2</sup>grey, no DRYM QTL on the linkage group (LG); Co, overlapping eQTL under control conditions; Ds, overlapping eQTL under drought stress



Normalised metabolite data for 15 metabolites were used from two trials, 61711 (MPI Golm foil green house) and 68015 (JKI shelter), in the year 2014 measuring 95 A×R lines. For details of the drought experiments : Haas et al. [38].

Original intensities of each metabolite were normalized to the average original intensity (response) of all annotated analytes in a sample and log10-transformed.

Transformed data were corrected for analytical batch and sequence effects according to the procedure described in the methods section (missing data are given as -99).

[illegible]

|     |             |           |           |           |           |           |           |             |           |           |           |           |             |             |            |     |     |
|-----|-------------|-----------|-----------|-----------|-----------|-----------|-----------|-------------|-----------|-----------|-----------|-----------|-------------|-------------|------------|-----|-----|
| 101 | -99         | -99       | -99       | -99       | -99       | -99       | -99       | -99         | -99       | -99       | -99       | -99       | -99         | -99         | -99        | -99 | -99 |
| 102 | -99         | -99       | -99       | -99       | -99       | -99       | -99       | -99         | -99       | -99       | -99       | -99       | -99         | -99         | -99        | -99 | -99 |
| 103 | 3,335924142 | 4,6473429 | 5,257595  | 4,2773728 | 5,8041601 | 3,2107132 | 5,3799425 | 3,989020474 | 5,5062068 | 3,9591663 | 3,7720372 | 4,2293269 | 5,301134366 | 4,316421536 | 2,94437523 |     |     |
| 104 | 3,322616125 | 3,8575792 | 4,4960506 | 4,3387206 | 5,7966975 | 3,4646745 | 5,3801303 | 3,931994424 | 5,4218568 | 3,865661  | 3,8887974 | 4,367985  | 5,306263497 | 4,345089767 |            |     |     |
| 105 | -99         | -99       | -99       | -99       | -99       | -99       | -99       | -99         | -99       | -99       | -99       | -99       | -99         | -99         | -99        | -99 | -99 |
| 106 | 3,164727642 | 4,1547038 | 5,299735  | 4,4827227 | 5,786179  | 3,3957903 | 5,3568847 | 3,947809644 | 5,4668342 | 4,0893887 | 3,9950486 | 4,5172982 | 5,391691893 | 4,098864192 | 3,56320235 |     |     |
| 107 | 3,415108207 | 3,7095619 | 4,4325006 | 4,4346545 | 5,5059917 | 3,4994427 | 5,3257735 | 3,821911012 | 5,5153768 | 4,355747  | 4,0231203 | 4,2378283 | 5,246668358 | 4,437085832 |            |     |     |
| 108 | -99         | -99       | -99       | -99       | -99       | -99       | -99       | -99         | -99       | -99       | -99       | -99       | -99         | -99         | -99        | -99 | -99 |
| 109 | -99         | -99       | -99       | -99       | -99       | -99       | -99       | -99         | -99       | -99       | -99       | -99       | -99         | -99         | -99        | -99 | -99 |
| 110 | 3,171889745 | 4,307831  | 5,0416063 | 4,2000434 | 5,8586566 | 3,5848386 | 5,3695177 | 4,067579913 | 5,5099989 | 4,085688  | 3,7865163 | 4,0820957 | 4,94393268  | 4,846288179 |            |     |     |
| 111 | -99         | -99       | -99       | -99       | -99       | -99       | -99       | -99         | -99       | -99       | -99       | -99       | -99         | -99         | -99        | -99 | -99 |
| 112 | -99         | -99       | -99       | -99       | -99       | -99       | -99       | -99         | -99       | -99       | -99       | -99       | -99         | -99         | -99        | -99 | -99 |
| 113 | -99         | -99       | -99       | -99       | -99       | -99       | -99       | -99         | -99       | -99       | -99       | -99       | -99         | -99         | -99        | -99 | -99 |
| 114 | 3,368895856 | 4,7680973 | 5,2964623 | 4,2132201 | 4,8660619 | 3,3324041 | 5,3855052 | 3,728178244 | 5,5220253 | 4,0787261 | 3,8705312 | 4,0543796 | 5,10331184  | 4,685233872 |            |     |     |
| 115 | -99         | -99       | -99       | -99       | -99       | -99       | -99       | -99         | -99       | -99       | -99       | -99       | -99         | -99         | -99        | -99 | -99 |
| 116 | -99         | -99       | -99       | -99       | -99       | -99       | -99       | -99         | -99       | -99       | -99       | -99       | -99         | -99         | -99        | -99 | -99 |
| 117 | -99         | -99       | -99       | -99       | -99       | -99       | -99       | -99         | -99       | -99       | -99       | -99       | -99         | -99         | -99        | -99 | -99 |
| 118 | -99         | -99       | -99       | -99       | -99       | -99       | -99       | -99         | -99       | -99       | -99       | -99       | -99         | -99         | -99        | -99 | -99 |
| 119 | -99         | -99       | -99       | -99       | -99       | -99       | -99       | -99         | -99       | -99       | -99       | -99       | -99         | -99         | -99        | -99 | -99 |
| 120 | 3,139981412 | 4,2695812 | 5,432275  | 4,4618399 | 5,569986  | 3,1379769 | 5,3557609 | 3,871615956 | 5,5461124 | 3,9886065 | 3,8751159 | 4,0219113 | 5,236201497 | 4,659759877 |            |     |     |
| 121 | 3,454096086 | 3,7341455 | 4,3596895 | 4,2906419 | 4,4304326 | 3,5925022 | 5,365223  | 3,129258489 | 5,5429745 | 4,2038059 | 4,0724186 | 4,1213319 | 5,118476742 | 4,940908969 |            |     |     |
| 122 | 3,370344418 | 3,6974609 | 4,2527541 | 4,4889638 | 5,5183541 | 3,5676726 | 5,4052929 | 4,184719472 | 5,5412994 | 4,0496262 | 3,8936796 | 3,9649635 | 5,159619999 | 4,984928624 | 3,05503151 |     |     |
| 123 | -99         | -99       | -99       | -99       | -99       | -99       | -99       | -99         | -99       | -99       | -99       | -99       | -99         | -99         | -99        | -99 | -99 |
| 124 | -99         | -99       | -99       | -99       | -99       | -99       | -99       | -99         | -99       | -99       | -99       | -99       | -99         | -99         | -99        | -99 | -99 |
| 125 | -99         | -99       | -99       | -99       | -99       | -99       | -99       | -99         | -99       | -99       | -99       | -99       | -99         | -99         | -99        | -99 | -99 |
| 126 | -99         | -99       | -99       | -99       | -99       | -99       | -99       | -99         | -99       | -99       | -99       | -99       | -99         | -99         | -99        | -99 | -99 |
| 127 | 3,310204106 | 3,8493481 | 4,4779168 | 4,4899371 | 5,6269581 | 4,1380639 | 5,4039669 | 3,990285978 | 5,4812085 | 4,253975  | 4,0144062 | 4,375973  | 5,327738594 | 5,025123577 | 3,75980532 |     |     |
| 128 | -99         | -99       | -99       | -99       | -99       | -99       | -99       | -99         | -99       | -99       | -99       | -99       | -99         | -99         | -99        | -99 | -99 |
| 129 | -99         | -99       | -99       | -99       | -99       | -99       | -99       | -99         | -99       | -99       | -99       | -99       | -99         | -99         | -99        | -99 | -99 |
| 130 | -99         | -99       | -99       | -99       | -99       | -99       | -99       | -99         | -99       | -99       | -99       | -99       | -99         | -99         | -99        | -99 | -99 |
| 131 | -99         | -99       | -99       | -99       | -99       | -99       | -99       | -99         | -99       | -99       | -99       | -99       | -99         | -99         | -99        | -99 | -99 |
| 132 | -99         | -99       | -99       | -99       | -99       | -99       | -99       | -99         | -99       | -99       | -99       | -99       | -99         | -99         | -99        | -99 | -99 |
| 133 | -99         | -99       | -99       | -99       | -99       | -99       | -99       | -99         | -99       | -99       | -99       | -99       | -99         | -99         | -99        | -99 | -99 |
| 134 | -99         | -99       | -99       | -99       | -99       | -99       | -99       | -99         | -99       | -99       | -99       | -99       | -99         | -99         | -99        | -99 | -99 |
| 135 | -99         | -99       | -99       | -99       | -99       | -99       | -99       | -99         | -99       | -99       | -99       | -99       | -99         | -99         | -99        | -99 | -99 |
| 136 | -99         | -99       | -99       | -99       | -99       | -99       | -99       | -99         | -99       | -99       | -99       | -99       | -99         | -99         | -99        | -99 | -99 |
| 137 | -99         | -99       | -99       | -99       | -99       | -99       | -99       | -99         | -99       | -99       | -99       | -99       | -99         | -99         | -99        | -99 | -99 |
| 138 | 3,150927165 | 3,8358259 | 4,4543878 | 4,3816931 | 5,5516825 | 3,2465476 | 5,3645658 | 3,659941424 | 5,5408311 | 4,1566629 | 3,9920728 | 4,3681638 | 5,220395111 | 4,291003235 | 2,61815315 |     |     |
| 139 | -99         | -99       | -99       | -99       | -99       | -99       | -99       | -99         | -99       | -99       | -99       | -99       | -99         | -99         | -99        | -99 | -99 |
| 140 | 3,314702938 | 4,0451884 | 4,6284762 | 4,5019653 | 5,6013301 | 3,3077173 | 5,3873922 | 3,802434302 | 5,4816311 | 4,1811453 | 3,977501  | 4,2415683 | 5,305123785 | 3,84318608  |            |     |     |
| 141 | 3,275195686 | 3,8820694 | 4,585837  | 4,466272  | 5,6790723 | 3,7222403 | 5,4501951 | 3,928194156 | 5,5008984 | 4,1294978 | 4,0301605 | 4,2098273 | 5,28191258  | 4,678230452 | 3,08327994 |     |     |
| 142 | 3,271733551 | 4,3056262 | 4,8303676 | 4,2083791 | 5,8181161 | 3,5011082 | 5,2693744 | 4,313297797 | 5,5300876 | 4,1584028 | 3,8333687 | 4,0494431 | 5,070497539 | 4,578249989 | 3,00181321 |     |     |
| 143 | 3,545212812 | 3,9069518 | 5,2254301 | 4,3143792 | 5,4233427 | 3,7513277 | 5,3295191 | 3,619695433 | 5,5596415 | 4,2007048 | 3,9380451 | 4,0101329 | 5,229938423 | 4,673462961 | 2,88337758 |     |     |
| 144 | -99         | -99       | -99       | -99       | -99       | -99       | -99       | -99         | -99       | -99       | -99       | -99       | -99         | -99         | -99        | -99 | -99 |
| 145 | 3,361702474 | 3,8770323 | 5,2715368 | 4,3290978 | 5,4463383 | 3,0913819 | 5,2977928 | 3,922970687 | 5,558937  | 4,3595084 | 3,8385072 | 4,1865306 | 5,276227089 | 4,509725641 | 3,29162860 |     |     |
| 146 | -99         | -99       | -99       | -99       | -99       | -99       | -99       | -99         | -99       | -99       | -99       | -99       | -99         | -99         | -99        | -99 | -99 |
| 147 | 3,636216267 | 3,7200794 | 4,397921  | 4,3267793 | 5,4059028 | 3,8979266 | 5,392359  | 3,774414924 | 5,5590624 | 4,2184296 | 4,0813786 | 4,4589511 | 5,29225381  | 4,786818228 | 3,00678045 |     |     |
| 148 | -99         | -99       | -99       | -99       | -99       | -99       | -99       | -99         | -99       | -99       | -99       | -99       | -99         | -99         | -99        | -99 | -99 |
| 149 | -99         | -99       | -99       | -99       | -99       | -99       | -99       | -99         | -99       | -99       | -99       | -99       | -99         | -99         | -99        | -99 | -99 |
| 150 | -99         | -99       | -99       | -99       | -99       | -99       | -99       | -99         | -99       | -99       | -99       | -99       | -99         | -99         | -99        | -99 | -99 |
| 151 | -99         | -99       | -99       | -99       | -99       | -99       | -99       | -99         | -99       | -99       | -99       | -99       | -99         | -99         | -99        | -99 | -99 |
| 152 | 3,462413194 | 3,8834366 | 4,5064244 | 4,5484998 | 5,5684606 | 3,3514492 | 5,4071637 | 3,643498412 | 5,4718797 | 3,9566544 | 3,908802  | 4,3769515 | 5,382322444 | 4,993270399 | 3,41534741 |     |     |
| 153 | -99         | -99       | -99       | -99       | -99       | -99       | -99       | -99         | -99       | -99       | -99       | -99       | -99         | -99         | -99        | -99 | -99 |
| 154 | -99         | -99       | -99       | -99       | -99       | -99       | -99       | -99         | -99       | -99       | -99       | -99       | -99         | -99         | -99        | -99 | -99 |
| 155 | -99         | -99       | -99       | -99       | -99       | -99       | -99       | -99         | -99       | -99       | -99       | -99       | -99         | -99         | -99        | -99 | -99 |
| 156 | -99         | -99       | -99       | -99       | -99       | -99       | -99       | -99         | -99       | -99       | -99       | -99       | -99         | -99         | -99        | -99 | -99 |
| 157 | -99         | -99       | -99       | -99       | -99       | -99       | -99       | -99         | -99       | -99       | -99       | -99       | -99         | -99         | -99        | -99 | -99 |
| 158 | -99         | -99       | -99       | -99       | -99       | -99       | -99       | -99         | -99       | -99       | -99       | -99       | -99         | -99         | -99        | -99 | -99 |
| 159 | 2,995730962 | 3,7825018 | 4,5123864 | 4,3094735 | 5,6088083 | 3,8812505 | 5,5213115 | 4,021563743 | 5,4080689 | 4,1217575 | 3,9701374 | 4,5271375 | 5,310169314 | 3,736050125 |            |     |     |
| 160 | 3,12729086  | 3,8984296 | 4,4772618 | 4,3345203 | 5,6388229 | 3,5198289 | 5,3229988 | 3,821314919 | 5,5442442 | 4,0396407 | 3,9660218 | 4,2348822 | 5,224773476 | 4,526845113 | 3,18604876 |     |     |
| 161 | 3,126039729 | 3,785164  | 4,4873587 | 4,26575   | 5,6613618 | 3,9014824 | 5,477934  | 3,904471768 | 5,4039814 | 4,1215059 | 3,9516945 | 4,4245419 | 5,364213144 | 3,623701931 | 3,02576258 |     |     |
| 162 | -99         | -99       | -99       | -99       | -99       | -99       | -99       | -99         | -99       | -99       | -99       | -99       | -99         | -99         | -99        | -99 | -99 |
| 163 | -99         | -99       | -99       | -99       | -99       | -99       | -99       | -99         | -99       | -99       | -99       | -99       | -99         | -99         | -99        | -99 | -99 |
| 164 | 2,957733044 | 4,3704959 | 5,2232396 | 4,46271   | 5,6771251 | 3,5366991 | 5,6332198 | 4,022172366 | 5,4045708 | 4,0915288 | 4,0997591 | 4,5716238 | 5,304186692 | 4,647406287 |            |     |     |
| 165 | -99         | -99       | -99       | -99       | -99       | -99       | -99       | -99         | -99       | -99       | -99       | -99       | -99         | -99         | -99        | -99 | -99 |
| 166 | -99         | -99       | -99       | -99       | -99       | -99       | -99       | -99         | -99       | -99       | -99       | -99       | -99         | -99         | -99        | -99 | -99 |
| 167 | 3,571837264 | 3,5175489 | 4,1764295 | 4,4398689 | 5,7111955 | 3,7249945 | 5,3353071 | 3,770576005 | 5,5286252 | 4,1045397 | 3,9708921 | 4,2256288 | 5,235805798 | 4,675575802 |            |     |     |
| 168 | -99         | -99       | -99       | -99       | -99       | -99       | -99       | -99         | -99       | -99       | -99       | -99       | -99         | -99         | -99        | -99 | -99 |
| 169 | -99         | -99       | -99       | -99       | -99       | -99       | -99       | -99         | -99       | -99       | -99       | -99       | -99         | -99         | -99        | -99 | -99 |
| 170 | -99         | -99       | -99       | -99       | -99       | -99       | -99       | -99         | -99       | -99       | -99       | -99       | -99         | -99         | -99        | -99 | -99 |
| 171 | 3,41622904  | 4,1505211 | 5,4733447 | 4,2732363 | 5,1382239 | 3,6828404 | 5,4007937 | 3,592051354 | 5,5602813 | 4,382389  | 3,8886958 | 4,1936768 | 5,300669426 | 4,6064409   |            |     |     |
| 172 | 3,129621501 | 3,8782891 | 4,6394444 | 4,4267202 | 4,3556476 | 3,6124403 | 5,3051203 | -99         | 5,5942263 | 4,0483086 | 3,5405124 | 4,1556868 | 5,286574639 | 5,155068478 | 2,57466098 |     |     |
| 173 | -99         | -99       | -99       | -99       | -99       | -99       | -99       | -99         | -99       | -99       | -99       | -99       | -99         | -99         | -99        | -99 | -99 |
| 174 | 3,417789288 | 3,9481231 | 5,4476514 | 4,3471643 | 4,7918331 | 3,6494968 | 5,3287994 | 3,013931286 | 5,5613926 | 4,1113678 | 3,9665895 | 3,8040312 | 5,08704518  | 4,851544167 |            |     |     |
| 175 | 3,482890905 | 4,059     |           |           |           |           |           |             |           |           |           |           |             |             |            |     |     |

[illegible]

[illegible]

[illegible]

[illegible]



| Catation       | MPI_FGH_14_Ds_M1 | MPI_FGH_14_Ds_M2 | MPI_FGH_14_Ds_M3 | MPI_FGH_14_Ds_M4 | MPI_FGH_14_Ds_M5 | MPI_FGH_14_Ds_M6 | MPI_FGH_14_Ds_M7 | MPI_FGH_14_Ds_M8 | MPI_FGH_14_Ds_M9 | MPI_FGH_14_Ds_M10 | MPI_FGH_14_Ds_M11 | MPI_FGH_14_Ds_M12 | MPI_FGH_14_Ds_M13 | MPI_FGH_14_Ds_M14 | MPI_FGH_14_Ds_M15 |
|----------------|------------------|------------------|------------------|------------------|------------------|------------------|------------------|------------------|------------------|-------------------|-------------------|-------------------|-------------------|-------------------|-------------------|
| Treatment      | Salicylic acid   | 4-Os_M2          | 4-Os_M3          | 4-Os_M4          | 4-Os_M5          | 4-Os_M6          | 4-Os_M7          | 4-Os_M8          | 4-Os_M9          | 4-Os_M10          | 4-Os_M11          | 4-Os_M12          | 4-Os_M13          | 4-Os_M14          | 4-Os_M15          |
| Metabolites    | Salicylic acid   | 4-Os_M2          | 4-Os_M3          | 4-Os_M4          | 4-Os_M5          | 4-Os_M6          | 4-Os_M7          | 4-Os_M8          | 4-Os_M9          | 4-Os_M10          | 4-Os_M11          | 4-Os_M12          | 4-Os_M13          | 4-Os_M14          | 4-Os_M15          |
| F1 individuals | Salicylic acid   | 4-Os_M2          | 4-Os_M3          | 4-Os_M4          | 4-Os_M5          | 4-Os_M6          | 4-Os_M7          | 4-Os_M8          | 4-Os_M9          | 4-Os_M10          | 4-Os_M11          | 4-Os_M12          | 4-Os_M13          | 4-Os_M14          | 4-Os_M15          |
| 1              | 3,51116504       | 4,0119402        | 4,8565168        | 4,2899107        | 5,5234485        | 3,7732879        | 4,9278128        | 4,195149717      | 5,5351733        | 4,6051398         | 4,0257236         | 4,4897449         | 5,324675082       | -99               | 3,78593774        |
| 2              | -99              | -99              | -99              | -99              | -99              | -99              | -99              | -99              | -99              | -99               | -99               | -99               | -99               | -99               | -99               |
| 3              | -99              | -99              | -99              | -99              | -99              | -99              | -99              | -99              | -99              | -99               | -99               | -99               | -99               | -99               | -99               |
| 4              | -99              | -99              | -99              | -99              | -99              | -99              | -99              | -99              | -99              | -99               | -99               | -99               | -99               | -99               | -99               |
| 5              | -99              | -99              | -99              | -99              | -99              | -99              | -99              | -99              | -99              | -99               | -99               | -99               | -99               | -99               | -99               |
| 6              | 3,523589509      | 3,8984781        | 4,5847575        | 4,2194599        | 5,4193692        | 3,601984         | 5,5535198        | 3,747968725      | 5,5051128        | 4,2676627         | 3,9553938         | 4,5292834         | 5,281702747       | 4,59257987        | 3,31127415        |
| 7              | -99              | -99              | -99              | -99              | -99              | -99              | -99              | -99              | -99              | -99               | -99               | -99               | -99               | -99               | -99               |
| 8              | -99              | -99              | -99              | -99              | -99              | -99              | -99              | -99              | -99              | -99               | -99               | -99               | -99               | -99               | -99               |
| 9              | -99              | -99              | -99              | -99              | -99              | -99              | -99              | -99              | -99              | -99               | -99               | -99               | -99               | -99               | -99               |
| 10             | -99              | -99              | -99              | -99              | -99              | -99              | -99              | -99              | -99              | -99               | -99               | -99               | -99               | -99               | -99               |
| 11             | -99              | -99              | -99              | -99              | -99              | -99              | -99              | -99              | -99              | -99               | -99               | -99               | -99               | -99               | -99               |
| 12             | -99              | -99              | -99              | -99              | -99              | -99              | -99              | -99              | -99              | -99               | -99               | -99               | -99               | -99               | -99               |
| 13             | -99              | -99              | -99              | -99              | -99              | -99              | -99              | -99              | -99              | -99               | -99               | -99               | -99               | -99               | -99               |
| 14             | -99              | -99              | -99              | -99              | -99              | -99              | -99              | -99              | -99              | -99               | -99               | -99               | -99               | -99               | -99               |
| 15             | -99              | -99              | -99              | -99              | -99              | -99              | -99              | -99              | -99              | -99               | -99               | -99               | -99               | -99               | -99               |
| 16             | 3,21310603       | 4,0273861        | 4,8483912        | 4,428754         | 5,5128248        | 2,8092407        | 5,613643         | 3,995672463      | 5,4880632        | 4,3173835         | 3,9927629         | 4,7000014         | 5,440427383       | 4,54570430        | 3,20750705        |
| 17             | 3,506656176      | 4,2179059        | 5,4032752        | 3,9965275        | 5,4858171        | 3,8874505        | 4,7777511        | 3,891492516      | 5,5193795        | 4,0976881         | 3,9445254         | 4,4554776         | 5,34433477        | -99               | 3,06453673        |
| 18             | 3,350299289      | 3,9477419        | 4,8838132        | 4,2831213        | 5,5225065        | 3,863018         | 5,2448826        | 4,30352169       | 5,5237169        | 4,1996778         | 4,0637462         | 4,5815909         | 5,329034875       | -99               | 3,65072187        |
| 19             | 3,261985467      | 4,2712769        | 5,2267541        | 4,1765363        | 5,4322091        | 3,7775509        | 5,2006086        | 3,761402505      | 5,5131349        | 4,2772907         | 4,0184912         | 4,3818459         | 5,328302762       | -99               | 3,12380525        |
| 20             | -99              | -99              | -99              | -99              | -99              | -99              | -99              | -99              | -99              | -99               | -99               | -99               | -99               | -99               | -99               |
| 21             | -99              | -99              | -99              | -99              | -99              | -99              | -99              | -99              | -99              | -99               | -99               | -99               | -99               | -99               | -99               |
| 22             | -99              | -99              | -99              | -99              | -99              | -99              | -99              | -99              | -99              | -99               | -99               | -99               | -99               | -99               | -99               |
| 23             | -99              | -99              | -99              | -99              | -99              | -99              | -99              | -99              | -99              | -99               | -99               | -99               | -99               | -99               | -99               |
| 24             | 3,275550401      | 4,1355961        | 4,946058         | 4,5161191        | 5,5243164        | 3,4683004        | 5,6014044        | 4,060871203      | 5,4572908        | 3,8975905         | 4,0993386         | 4,7071205         | 5,317654756       | 4,97156786        | 3,26661673        |
| 25             | -99              | -99              | -99              | -99              | -99              | -99              | -99              | -99              | -99              | -99               | -99               | -99               | -99               | -99               | -99               |
| 26             | -99              | -99              | -99              | -99              | -99              | -99              | -99              | -99              | -99              | -99               | -99               | -99               | -99               | -99               | -99               |
| 27             | -99              | -99              | -99              | -99              | -99              | -99              | -99              | -99              | -99              | -99               | -99               | -99               | -99               | -99               | -99               |
| 28             | -99              | -99              | -99              | -99              | -99              | -99              | -99              | -99              | -99              | -99               | -99               | -99               | -99               | -99               | -99               |
| 29             | -99              | -99              | -99              | -99              | -99              | -99              | -99              | -99              | -99              | -99               | -99               | -99               | -99               | -99               | -99               |
| 30             | -99              | -99              | -99              | -99              | -99              | -99              | -99              | -99              | -99              | -99               | -99               | -99               | -99               | -99               | -99               |
| 31             | -99              | -99              | -99              | -99              | -99              | -99              | -99              | -99              | -99              | -99               | -99               | -99               | -99               | -99               | -99               |
| 32             | -99              | -99              | -99              | -99              | -99              | -99              | -99              | -99              | -99              | -99               | -99               | -99               | -99               | -99               | -99               |
| 33             | 3,099115661      | 4,1702574        | 4,9045736        | 3,8983949        | 5,4882763        | 3,8412616        | 5,5475465        | 3,965919365      | 5,5186838        | 4,3319032         | 3,9751213         | 4,5706803         | 5,306917861       | 4,77943273        | 3,37552029        |
| 34             | -99              | -99              | -99              | -99              | -99              | -99              | -99              | -99              | -99              | -99               | -99               | -99               | -99               | -99               | -99               |
| 35             | 3,277267952      | 4,0790838        | 4,9142355        | 4,4713232        | 5,4168989        | 3,1569579        | 5,534671         | 3,662326126      | 5,4757534        | 4,4295271         | 4,0984109         | 4,4830211         | 5,489546519       | 5,02286943        | 3,27541223        |
| 36             | -99              | -99              | -99              | -99              | -99              | -99              | -99              | -99              | -99              | -99               | -99               | -99               | -99               | -99               | -99               |
| 37             | -99              | -99              | -99              | -99              | -99              | -99              | -99              | -99              | -99              | -99               | -99               | -99               | -99               | -99               | -99               |
| 38             | -99              | -99              | -99              | -99              | -99              | -99              | -99              | -99              | -99              | -99               | -99               | -99               | -99               | -99               | -99               |
| 39             | -99              | -99              | -99              | -99              | -99              | -99              | -99              | -99              | -99              | -99               | -99               | -99               | -99               | -99               | -99               |
| 40             | 3,23365029       | 4,2459187        | 4,8632294        | 4,2973352        | 5,4718618        | 3,6514157        | 5,5248927        | 3,999179199      | 5,486333         | 4,5565543         | 3,9519437         | 4,6047529         | 5,25723111        | 5,12168155        | 3,06751977        |
| 41             | -99              | -99              | -99              | -99              | -99              | -99              | -99              | -99              | -99              | -99               | -99               | -99               | -99               | -99               | -99               |
| 42             | -99              | -99              | -99              | -99              | -99              | -99              | -99              | -99              | -99              | -99               | -99               | -99               | -99               | -99               | -99               |
| 43             | 3,483904338      | 4,0891451        | 5,0394542        | 4,3305294        | 5,4112355        | 3,5113634        | 5,2336331        | 3,960618436      | 5,5014927        | 4,187427          | 3,9671741         | 4,3402317         | 5,331336636       | 4,04299431        | 3,42767888        |
| 44             | -99              | -99              | -99              | -99              | -99              | -99              | -99              | -99              | -99              | -99               | -99               | -99               | -99               | -99               | -99               |
| 45             | -99              | -99              | -99              | -99              | -99              | -99              | -99              | -99              | -99              | -99               | -99               | -99               | -99               | -99               | -99               |
| 46             | 3,300513752      | 4,1295941        | 5,1146006        | 4,2492492        | 5,4984619        | 3,3179214        | 5,5191509        | 3,838744606      | 5,485793         | 4,2291745         | 4,0726368         | 4,6136534         | 5,400788695       | 4,84642045        | 3,00777712        |
| 47             | -99              | -99              | -99              | -99              | -99              | -99              | -99              | -99              | -99              | -99               | -99               | -99               | -99               | -99               | -99               |
| 48             | -99              | -99              | -99              | -99              | -99              | -99              | -99              | -99              | -99              | -99               | -99               | -99               | -99               | -99               | -99               |
| 49             | 3,41221975       | 3,9241241        | 4,8448086        | 4,3099138        | 5,3769707        | 3,6230314        | 5,6166522        | 3,757915907      | 5,4907545        | 4,1194013         | 4,0267193         | 4,4802231         | 5,3515033         | 4,40002317        | 3,68056443        |
| 50             | 3,302825191      | 4,2000947        | 4,9658441        | 4,1889221        | 5,5565948        | -99              | 4,6194299        | 4,279503923      | 5,5280623        | 4,3035571         | 3,8569099         | 4,4995375         | 4,990129174       | -99               | 3,03021903        |
| 51             | 3,473348546      | 4,2792344        | 4,9959516        | 4,1488862        | 5,5250504        | 3,5798134        | 5,1954727        | 4,183028014      | 5,5006274        | 4,2456566         | 4,1291596         | 4,5900469         | 5,412582048       | 4,46898110        | 2,88471840        |
| 52             | -99              | -99              | -99              | -99              | -99              | -99              | -99              | -99              | -99              | -99               | -99               | -99               | -99               | -99               | -99               |
| 53             | -99              | -99              | -99              | -99              | -99              | -99              | -99              | -99              | -99              | -99               | -99               | -99               | -99               | -99               | -99               |
| 54             | -99              | -99              | -99              | -99              | -99              | -99              | -99              | -99              | -99              | -99               | -99               | -99               | -99               | -99               | -99               |
| 55             | -99              | -99              | -99              | -99              | -99              | -99              | -99              | -99              | -99              | -99               | -99               | -99               | -99               | -99               | -99               |
| 56             | -99              | -99              | -99              | -99              | -99              | -99              | -99              | -99              | -99              | -99               | -99               | -99               | -99               | -99               | -99               |
| 57             | 3,677509846      | 4,1449954        | 4,8366926        | 4,0787546        | 5,5329271        | 3,6097268        | 5,5038536        | 3,781742993      | 5,4929678        | 4,4508956         | 3,9552331         | 4,4468379         | 5,302595788       | 3,87861972        | 3,82373032        |
| 58             | 3,513961668      | 4,0509145        | 5,118089         | 3,9700406        | 5,5424475        | 3,5098829        | 5,4709302        | 4,023024973      | 5,5216542        | 4,1789177         | 3,8928676         | 4,2778063         | 5,172766263       | 5,02086957        | 2,88878344        |
| 59             | -99              | -99              | -99              | -99              | -99              | -99              | -99              | -99              | -99              | -99               | -99               | -99               | -99               | -99               | -99               |
| 60             | -99              | -99              | -99              | -99              | -99              | -99              | -99              | -99              | -99              | -99               | -99               | -99               | -99               | -99               | -99               |
| 61             | 3,433109607      | 4,1922882        | 4,8711209        | 4,1414335        | 5,3481227        | 3,8351657        | 5,5419852        | 3,939575193      | 5,4779268        | 4,6277815         | 4,0287924         | 4,5170957         | 5,387316186       | 4,11414037        | 3,40003116        |
| 62             | -99              | -99              | -99              | -99              | -99              | -99              | -99              | -99              | -99              | -99               | -99               | -99               | -99               | -99               | -99               |
| 63             | -99              | -99              | -99              | -99              | -99              | -99              | -99              | -99              | -99              | -99               | -99               | -99               | -99               | -99               | -99               |
| 64             | -99              | -99              | -99              | -99              | -99              | -99              | -99              | -99              | -99              | -99               | -99               | -99               | -99               | -99               | -99               |
| 65             | 3,293322661      | 3,8696872        | 4,8639421        | 4,2810426        | 5,4536909        | 3,5921968        | 5,5416442        | 3,81683214       | 5,5066723        | 4,3210135         | 3,9659888         | 4,3438938         | 5,319445882       | 4,81393582        | 3,05834636        |
| 66             | -99              | -99              | -99              | -99              | -99              | -99              | -99              | -99              | -99              | -99               | -99               | -99               | -99               | -99               | -99               |
| 67             | -99              | -99              | -99              | -99              | -99              | -99              | -99              | -99              | -99              | -99               | -99               | -99               | -99               | -99               | -99               |
| 68             | -99              | -99              | -99              | -99              | -99              | -99              | -99              | -99              | -99              | -99               | -99               | -99               | -99               | -99               | -99               |



|     |             |           |           |           |           |           |           |             |           |           |           |           |             |            |            |     |     |
|-----|-------------|-----------|-----------|-----------|-----------|-----------|-----------|-------------|-----------|-----------|-----------|-----------|-------------|------------|------------|-----|-----|
| 69  | -99         | -99       | -99       | -99       | -99       | -99       | -99       | -99         | -99       | -99       | -99       | -99       | -99         | -99        | -99        | -99 | -99 |
| 70  | -99         | -99       | -99       | -99       | -99       | -99       | -99       | -99         | -99       | -99       | -99       | -99       | -99         | -99        | -99        | -99 | -99 |
| 71  | -99         | -99       | -99       | -99       | -99       | -99       | -99       | -99         | -99       | -99       | -99       | -99       | -99         | -99        | -99        | -99 | -99 |
| 72  | -99         | -99       | -99       | -99       | -99       | -99       | -99       | -99         | -99       | -99       | -99       | -99       | -99         | -99        | -99        | -99 | -99 |
| 73  | -99         | -99       | -99       | -99       | -99       | -99       | -99       | -99         | -99       | -99       | -99       | -99       | -99         | -99        | -99        | -99 | -99 |
| 74  | -99         | -99       | -99       | -99       | -99       | -99       | -99       | -99         | -99       | -99       | -99       | -99       | -99         | -99        | -99        | -99 | -99 |
| 75  | 3,395949784 | 4,0338307 | 4,799828  | 4,3815193 | 5,5349701 | 3,65979   | 5,5586173 | 4,129980425 | 5,4897333 | 4,4199527 | 3,9968545 | 4,6746438 | 5,434030439 | 4,45988563 | 3,15266895 |     |     |
| 76  | -99         | -99       | -99       | -99       | -99       | -99       | -99       | -99         | -99       | -99       | -99       | -99       | -99         | -99        | -99        | -99 | -99 |
| 77  | -99         | -99       | -99       | -99       | -99       | -99       | -99       | -99         | -99       | -99       | -99       | -99       | -99         | -99        | -99        | -99 | -99 |
| 78  | -99         | -99       | -99       | -99       | -99       | -99       | -99       | -99         | -99       | -99       | -99       | -99       | -99         | -99        | -99        | -99 | -99 |
| 79  | -99         | -99       | -99       | -99       | -99       | -99       | -99       | -99         | -99       | -99       | -99       | -99       | -99         | -99        | -99        | -99 | -99 |
| 80  | -99         | -99       | -99       | -99       | -99       | -99       | -99       | -99         | -99       | -99       | -99       | -99       | -99         | -99        | -99        | -99 | -99 |
| 81  | -99         | -99       | -99       | -99       | -99       | -99       | -99       | -99         | -99       | -99       | -99       | -99       | -99         | -99        | -99        | -99 | -99 |
| 82  | -99         | -99       | -99       | -99       | -99       | -99       | -99       | -99         | -99       | -99       | -99       | -99       | -99         | -99        | -99        | -99 | -99 |
| 83  | -99         | -99       | -99       | -99       | -99       | -99       | -99       | -99         | -99       | -99       | -99       | -99       | -99         | -99        | -99        | -99 | -99 |
| 84  | 3,104011225 | 4,0836456 | 5,0706441 | 4,3779312 | 5,5392851 | 3,8095334 | 5,5141217 | 4,046017282 | 5,4923337 | 4,1333179 | 4,1472508 | 4,7471997 | 5,439666027 | 4,22675426 | 3,23582128 |     |     |
| 85  | -99         | -99       | -99       | -99       | -99       | -99       | -99       | -99         | -99       | -99       | -99       | -99       | -99         | -99        | -99        | -99 | -99 |
| 86  | -99         | -99       | -99       | -99       | -99       | -99       | -99       | -99         | -99       | -99       | -99       | -99       | -99         | -99        | -99        | -99 | -99 |
| 87  | 3,22022164  | 4,2310402 | 5,1176211 | 4,2486862 | 5,3796709 | 3,4120601 | 5,4794131 | 3,751276474 | 5,4846502 | 4,1876158 | 4,0089173 | 4,5082596 | 5,384061418 | 4,81350864 | 3,09052433 |     |     |
| 88  | 3,364018348 | 4,0672226 | 4,8618941 | 3,9860945 | 5,5296711 | 3,851498  | 5,0017225 | 4,22044655  | 5,5248455 | 4,3000334 | 3,8948642 | 4,3100188 | 5,146689707 | 4,39054493 | 3,39054493 |     |     |
| 89  | 3,109466166 | 4,1419045 | 5,1232722 | 4,2055967 | 5,5014274 | 3,7094984 | 5,4234606 | 3,971041178 | 5,5227958 | 4,371644  | 4,0008877 | 4,5268326 | 5,261931479 | 3,79766696 | 3,09464367 |     |     |
| 90  | -99         | -99       | -99       | -99       | -99       | -99       | -99       | -99         | -99       | -99       | -99       | -99       | -99         | -99        | -99        | -99 | -99 |
| 91  | -99         | -99       | -99       | -99       | -99       | -99       | -99       | -99         | -99       | -99       | -99       | -99       | -99         | -99        | -99        | -99 | -99 |
| 92  | -99         | -99       | -99       | -99       | -99       | -99       | -99       | -99         | -99       | -99       | -99       | -99       | -99         | -99        | -99        | -99 | -99 |
| 93  | -99         | -99       | -99       | -99       | -99       | -99       | -99       | -99         | -99       | -99       | -99       | -99       | -99         | -99        | -99        | -99 | -99 |
| 94  | -99         | -99       | -99       | -99       | -99       | -99       | -99       | -99         | -99       | -99       | -99       | -99       | -99         | -99        | -99        | -99 | -99 |
| 95  | -99         | -99       | -99       | -99       | -99       | -99       | -99       | -99         | -99       | -99       | -99       | -99       | -99         | -99        | -99        | -99 | -99 |
| 96  | -99         | -99       | -99       | -99       | -99       | -99       | -99       | -99         | -99       | -99       | -99       | -99       | -99         | -99        | -99        | -99 | -99 |
| 97  | -99         | -99       | -99       | -99       | -99       | -99       | -99       | -99         | -99       | -99       | -99       | -99       | -99         | -99        | -99        | -99 | -99 |
| 98  | -99         | -99       | -99       | -99       | -99       | -99       | -99       | -99         | -99       | -99       | -99       | -99       | -99         | -99        | -99        | -99 | -99 |
| 99  | 3,186969802 | 4,0127806 | 5,0378679 | 4,2501671 | 5,4770334 | 2,9230318 | 5,2704413 | 3,843532284 | 5,4943221 | 4,3307436 | 4,0433169 | 4,4782367 | 5,421839664 | 3,74822378 | 3,25635078 |     |     |
| 100 | 3,462977289 | 4,1494795 | 5,1124558 | 4,1446822 | 5,4042925 | 3,6748065 | 5,5795847 | 3,587535585 | 5,4782822 | 4,1865866 | 4,0157251 | 4,247168  | 5,303403614 | 4,86655088 | 2,78467559 |     |     |
| 101 | -99         | -99       | -99       | -99       | -99       | -99       | -99       | -99         | -99       | -99       | -99       | -99       | -99         | -99        | -99        | -99 | -99 |
| 102 | -99         | -99       | -99       | -99       | -99       | -99       | -99       | -99         | -99       | -99       | -99       | -99       | -99         | -99        | -99        | -99 | -99 |
| 103 | 3,240980367 | 4,3206979 | 5,297958  | 4,0648338 | 5,4763779 | 2,9606106 | 5,2429456 | 4,251178208 | 5,5088105 | 4,0274789 | 3,853016  | 4,2401229 | 5,219542934 | 4,31204244 | 3,20570117 |     |     |
| 104 | 3,309400266 | 4,2210683 | 5,0442089 | 4,3121573 | 5,4074973 | 3,8595947 | 5,5828545 | 3,849818573 | 5,4740094 | 4,3106339 | 4,0827752 | 4,6340761 | 5,467954694 | 4,88933899 | 2,89112552 |     |     |
| 105 | -99         | -99       | -99       | -99       | -99       | -99       | -99       | -99         | -99       | -99       | -99       | -99       | -99         | -99        | -99        | -99 | -99 |
| 106 | 3,382125055 | 4,2061543 | 5,0412456 | 4,5444238 | 5,4299914 | 3,6659253 | 5,5276996 | 3,988171767 | 5,4636636 | 4,2517964 | 3,9759057 | 4,5935753 | 5,388067645 | 4,12842659 | 3,69052290 |     |     |
| 107 | 3,056620433 | 3,9258735 | 5,0265182 | 4,2665482 | 5,4868664 | 3,8898065 | 5,4563521 | 4,27396298  | 5,4483928 | 4,2207391 | 3,9832706 | 4,7116037 | 5,174862417 | 4,61762605 | 3,05257463 |     |     |
| 108 | -99         | -99       | -99       | -99       | -99       | -99       | -99       | -99         | -99       | -99       | -99       | -99       | -99         | -99        | -99        | -99 | -99 |
| 109 | -99         | -99       | -99       | -99       | -99       | -99       | -99       | -99         | -99       | -99       | -99       | -99       | -99         | -99        | -99        | -99 | -99 |
| 110 | 3,386082736 | 4,1567712 | 5,0206427 | 4,2052441 | 5,5459401 | 3,9438581 | 5,0146137 | 4,070403147 | 5,5053519 | 4,4558054 | 3,9489414 | 4,7166021 | 5,320724173 | 3,67750326 | 3,15356861 |     |     |
| 111 | -99         | -99       | -99       | -99       | -99       | -99       | -99       | -99         | -99       | -99       | -99       | -99       | -99         | -99        | -99        | -99 | -99 |
| 112 | -99         | -99       | -99       | -99       | -99       | -99       | -99       | -99         | -99       | -99       | -99       | -99       | -99         | -99        | -99        | -99 | -99 |
| 113 | -99         | -99       | -99       | -99       | -99       | -99       | -99       | -99         | -99       | -99       | -99       | -99       | -99         | -99        | -99        | -99 | -99 |
| 114 | 3,36624276  | 3,9022287 | 4,888185  | 3,9713174 | 5,5234052 | 3,7035595 | 4,5583189 | 4,157120459 | 5,5384008 | 4,2283235 | 3,987737  | 4,2431245 | 5,098646973 | -99        | 2,35173911 |     |     |
| 115 | -99         | -99       | -99       | -99       | -99       | -99       | -99       | -99         | -99       | -99       | -99       | -99       | -99         | -99        | -99        | -99 | -99 |
| 116 | -99         | -99       | -99       | -99       | -99       | -99       | -99       | -99         | -99       | -99       | -99       | -99       | -99         | -99        | -99        | -99 | -99 |
| 117 | -99         | -99       | -99       | -99       | -99       | -99       | -99       | -99         | -99       | -99       | -99       | -99       | -99         | -99        | -99        | -99 | -99 |
| 118 | -99         | -99       | -99       | -99       | -99       | -99       | -99       | -99         | -99       | -99       | -99       | -99       | -99         | -99        | -99        | -99 | -99 |
| 119 | -99         | -99       | -99       | -99       | -99       | -99       | -99       | -99         | -99       | -99       | -99       | -99       | -99         | -99        | -99        | -99 | -99 |
| 120 | 3,07468469  | 4,1279206 | 5,0887208 | 4,3843572 | 5,5281065 | 2,9556499 | 5,3575139 | 3,912883393 | 5,4964998 | 4,1126827 | 3,9371451 | 4,4200985 | 5,307866988 | 4,37080420 | 2,24439685 |     |     |
| 121 | 3,397620003 | 4,2227075 | 5,0369368 | 3,9781195 | 5,4966901 | 3,582305  | 5,4259771 | 3,9484659   | 5,5096079 | 4,3121744 | 3,926471  | 4,4427753 | 5,233556869 | 4,38933354 | 2,86197148 |     |     |
| 122 | 3,388578269 | 4,0118853 | 4,9116347 | 4,313064  | 5,5126284 | 3,6786216 | 5,2556059 | 4,142849212 | 5,527473  | 4,1734165 | 3,8914474 | 4,4264288 | 5,179872627 | 4,38348186 | 3,46342746 |     |     |
| 123 | -99         | -99       | -99       | -99       | -99       | -99       | -99       | -99         | -99       | -99       | -99       | -99       | -99         | -99        | -99        | -99 | -99 |
| 124 | -99         | -99       | -99       | -99       | -99       | -99       | -99       | -99         | -99       | -99       | -99       | -99       | -99         | -99        | -99        | -99 | -99 |
| 125 | -99         | -99       | -99       | -99       | -99       | -99       | -99       | -99         | -99       | -99       | -99       | -99       | -99         | -99        | -99        | -99 | -99 |
| 126 | -99         | -99       | -99       | -99       | -99       | -99       | -99       | -99         | -99       | -99       | -99       | -99       | -99         | -99        | -99        | -99 | -99 |
| 127 | 3,476538648 | 4,0966717 | 4,8410875 | 4,4889152 | 5,4224656 | 4,27338   | 5,5794453 | 3,809188346 | 5,5120842 | 4,2305323 | 4,0122063 | 4,6193506 | 5,398574585 | 4,88957469 | 3,70842410 |     |     |
| 128 | -99         | -99       | -99       | -99       | -99       | -99       | -99       | -99         | -99       | -99       | -99       | -99       | -99         | -99        | -99        | -99 | -99 |
| 129 | -99         | -99       | -99       | -99       | -99       | -99       | -99       | -99         | -99       | -99       | -99       | -99       | -99         | -99        | -99        | -99 | -99 |
| 130 | -99         | -99       | -99       | -99       | -99       | -99       | -99       | -99         | -99       | -99       | -99       | -99       | -99         | -99        | -99        | -99 | -99 |
| 131 | -99         | -99       | -99       | -99       | -99       | -99       | -99       | -99         | -99       | -99       | -99       | -99       | -99         | -99        | -99        | -99 | -99 |
| 132 | -99         | -99       | -99       | -99       | -99       | -99       | -99       | -99         | -99       | -99       | -99       | -99       | -99         | -99        | -99        | -99 | -99 |
| 133 | -99         | -99       | -99       | -99       | -99       | -99       | -99       | -99         | -99       | -99       | -99       | -99       | -99         | -99        | -99        | -99 | -99 |
| 134 | -99         | -99       | -99       | -99       | -99       | -99       | -99       | -99         | -99       | -99       | -99       | -99       | -99         | -99        | -99        | -99 | -99 |
| 135 | -99         | -99       | -99       | -99       | -99       | -99       | -99       | -99         | -99       | -99       | -99       | -99       | -99         | -99        | -99        | -99 | -99 |
| 136 | -99         | -99       | -99       | -99       | -99       | -99       | -99       | -99         | -99       | -99       | -99       | -99       | -99         | -99        | -99        | -99 | -99 |
| 137 | -99         | -99       | -99       | -99       | -99       | -99       | -99       | -99         | -99       | -99       | -99       | -99       | -99         | -99        | -99        | -99 | -99 |
| 138 | 3,006804882 | 4,1345163 | 4,9395293 | 4,1307654 | 5,4038313 | 3,4519918 | 5,676644  | 3,89310837  | 5,5105945 | 4,2774861 | 4,0019116 | 4,5830859 | 5,244075668 | 4,86372515 | 3,33194617 |     |     |
| 139 | -99         | -99       | -99       | -99       | -99       | -99       | -99       | -99         | -99       | -99       | -99       | -99       | -99         | -99        | -99        | -99 | -99 |
| 140 | 3,394721735 | 4,3044615 | 5,0451975 | 4,3170877 | 5,4012522 | 3,5584017 | 5,3987534 | 3,681639714 | 5,508489  | 4,5437976 | 4,0459783 | 4,4093499 | 5,427336307 | -99        | 3,11430083 |     |     |
| 141 | 3,273912022 | 4,1456413 | 5,0101674 | 4,0886943 | 5,4593251 | 3,9792657 | 5,5281488 | 3,829532069 | 5,5240606 | 4,3136371 | 3,9618191 | 4,5173963 | 5,323843786 | 4,63991091 | 3,17757824 |     |     |
| 142 | 3,434288597 | 4,0809964 | 4,620527  | 4,0250496 | 5,4395877 | 3,9547672 | 5,3605002 | 3,630407849 | 5,5123689 | 4,7546356 | 4,034036  | 4,713349  | 5,493949335 | -99        | 3,35939906 |     |     |
| 143 | 3,528398854 | 4,0042298 | 4,9617927 | 4,2832106 | 5,4827293 | 3,9817566 | 5,53607   | 3,987967297 | 5,4791954 | 4,3085815 | 4,0846718 | 4,5588445 | 5,400905951 | 4,72128250 | 3,22130948 |     |     |
| 144 | -99         | -99       | -99       | -99       | -99       | -99       | -99       | -99         | -99       | -99       | -99       | -99       | -99         | -99        | -99        | -99 | -99 |
| 145 | 3,195493017 | 4,210412  | 5,0868412 | 4,2820094 | 5,4771931 | 3,035611  | 5,0249947 | 4,025381724 | 5,48054   |           |           |           |             |            |            |     |     |

[illegible]

**Table S8** Selected metabolites previously identified as drought responsive [13] and respective mQTL overlapping with DRYM QTL.

| Metabolite <sup>1</sup>          | LG1 <sup>2</sup> |          | LG2 |          | LG3 |    | LG4 |    | LG5 |    | LG6 |    | LG7      |    | LG8 |    | LG9 |    | LG10 |     | LG11 |     | LG12 |     | Number of overlaps |
|----------------------------------|------------------|----------|-----|----------|-----|----|-----|----|-----|----|-----|----|----------|----|-----|----|-----|----|------|-----|------|-----|------|-----|--------------------|
|                                  | 1A               | 1R       | 2A  | 2R       | 3A  | 3R | 4A  | 4R | 5A  | 5R | 6A  | 6R | 7A       | 7R | 8A  | 8R | 9A  | 9R | 10A  | 10R | 11A  | 11R | 12A  | 12R |                    |
| Ribitol                          | 2Ds, 2Co         | 1Ds, 1Co |     |          |     |    |     |    |     |    |     |    |          |    |     |    |     |    |      |     |      |     |      |     | 6                  |
| A217004-101                      |                  | 1Ds      |     |          |     |    |     |    |     |    |     |    | 1Ds, 1Co |    | 1Ds |    |     |    |      |     |      |     |      |     | 4                  |
| Fumaric acid                     | 1Co              |          |     | 1Co      |     |    |     |    |     |    |     |    |          |    | 1Co |    |     |    |      |     | 1Ds  |     |      |     | 4                  |
| Salicylic acid-glucopyranoside   |                  |          |     | 1Ds, 1Co | 1Ds |    |     |    |     |    |     |    |          |    |     |    |     |    |      |     |      |     | 1Ds  |     | 4                  |
| Malic acid                       |                  |          |     |          |     |    |     |    |     |    |     |    |          |    | 1Co |    |     |    |      |     | 1Co  |     | 1Ds  |     | 3                  |
| A197007-101                      |                  | 1Co      |     |          |     |    | 1Ds |    |     |    |     |    |          |    | 1Co |    |     |    |      |     |      |     |      |     | 3                  |
| A237001-101                      |                  |          |     | 1Ds      |     |    |     |    |     |    |     |    |          |    |     |    |     |    |      |     |      |     | 1Ds  |     | 2                  |
| Quinic acid, 3-caffeoyl-, trans- |                  |          |     |          |     |    |     |    |     |    |     |    |          |    |     |    |     |    |      |     | 1Co  | 1Co |      |     | 2                  |
| Galactaric acid                  |                  | 1Ds      |     |          |     |    |     |    |     |    |     |    |          |    |     |    |     |    |      |     |      |     |      |     | 1                  |
| Galactinol                       |                  |          |     |          |     |    |     |    |     |    |     |    | 1Co      |    |     |    |     |    |      |     |      |     |      |     | 1                  |
| Threonic acid                    |                  |          |     |          |     |    |     |    |     |    |     |    |          |    |     |    |     |    |      |     |      |     | 1Co  |     | 1                  |
| Raffinose                        |                  |          |     |          |     |    |     |    |     |    |     |    |          |    |     |    |     |    |      |     |      |     |      |     | 0                  |
| A148006-101                      |                  |          |     |          |     |    |     |    |     |    |     |    |          |    |     |    |     |    |      |     |      |     |      |     | 0                  |
| A174001-101                      |                  |          |     |          |     |    |     |    |     |    |     |    |          |    |     |    |     |    |      |     |      |     |      |     | 0                  |
| A250002-101                      |                  |          |     |          |     |    |     |    |     |    |     |    |          |    |     |    |     |    |      |     |      |     |      |     | 0                  |

<sup>1</sup>Metabolites are sorted according to the descending number of mQTL overlapping with DRYM QTL.

<sup>2</sup>grey, no DRYM QTL on the linkage group (LG); Co, overlapping mQTL under control conditions; Ds, overlapping mQTL under drought stress

**Table S9: AFLP primer pairs used for the development of the genetic maps.**

| E-name | E-primer | M-name | M-primer |
|--------|----------|--------|----------|
| E32    | E-AAC    | M47    | M-CAA    |
| E32    | E-AAC    | M48    | M-CAC    |
| E32    | E-AAC    | M49    | M-CAG    |
| E32    | E-AAC    | M50    | M-CAT    |
| E32    | E-AAC    | M60    | M-CTC    |
| E32    | E-AAC    | M61    | M-CTG    |
| E32    | E-AAC    | M62    | M-CTT    |
| E33    | E-AAG    | M47    | M-CAA    |
| E33    | E-AAG    | M48    | M-CAC    |
| E33    | E-AAG    | M49    | M-CAG    |
| E33    | E-AAG    | M50    | M-CAT    |
| E33    | E-AAG    | M60    | M-CTC    |
| E33    | E-AAG    | M61    | M-CTG    |
| E33    | E-AAG    | M62    | M-CTT    |
| E35    | E-ACA    | M47    | M-CAA    |
| E35    | E-ACA    | M48    | M-CAC    |
| E35    | E-ACA    | M49    | M-CAG    |
| E35    | E-ACA    | M50    | M-CAT    |
| E35    | E-ACA    | M60    | M-CTC    |
| E35    | E-ACA    | M61    | M-CTG    |
| E35    | E-ACA    | M62    | M-CTT    |
| E36    | E-ACC    | M47    | M-CAA    |
| E36    | E-ACC    | M50    | M-CAT    |
| E36    | E-ACC    | M59    | M-CTA    |
| E36    | E-ACC    | M62    | M-CTT    |
| E37    | E-ACG    | M47    | M-CAA    |
| E37    | E-ACG    | M50    | M-CAT    |
| E38    | E-ACT    | M48    | M-CAC    |
| E38    | E-ACT    | M49    | M-CAG    |
| E38    | E-ACT    | M50    | M-CAT    |
| E38    | E-ACT    | M61    | M-CTG    |
| E38    | E-ACT    | M62    | M-CTT    |
| E39    | E-AGA    | M49    | M-CAG    |
| E39    | E-AGA    | M50    | M-CAT    |
| E39    | E-AGA    | M60    | M-CTC    |
| E40    | E-AGC    | M47    | M-CAA    |
| E40    | E-AGC    | M59    | M-CTA    |
| E40    | E-AGC    | M61    | M-CTG    |
| E40    | E-AGC    | M62    | M-CTT    |
| E41    | E-AGG    | M47    | M-CAA    |
| E41    | E-AGG    | M48    | M-CAC    |
| E41    | E-AGG    | M49    | M-CAG    |
| E41    | E-AGG    | M61    | M-CTG    |
| E41    | E-AGG    | M62    | M-CTT    |
| E42    | E-AGT    | M49    | M-CAG    |
| E45    | E-ATG    | M59    | M-CTA    |
| E45    | E-ATG    | M60    | M-CTC    |
